# Supplementary material for: Wild and zoo-housed orangutans differ in how they explore objects
Source: Sci Rep. 2025 Apr 30;15:14853. doi: 10.1038/s41598-025-97926-z (PMC12044031; doi:10.1038/s41598-025-97926-z)
Supplement: Supplementary file 1 — Supplementary Information 1. [file 41598_2025_97926_MOESM1_ESM.xlsx]

## Sheet: model 1a
NrExplorationEvents_ALL_CS_NEWEST	AgeAtThatTime_CS	Wild_Zoo	VisibleObsTime	Wild_Zoo.zoo	z.log.AgeAtThatTime_CS	FocalName
0	64.5147	wild	9.53	0	1.76282	ID.34
0	2.09993	wild	7.9	0	-1.37328	ID.21
0	8.35318	wild	6.88	0	-0.109001	ID.28
0	20.0684	wild	2.06	0	0.693574	ID.71
0	6.4011	wild	2.36	0	-0.352724	ID.9
0	20.0712	wild	8.66	0	0.693698	ID.71
0	6.40383	wild	8.54	0	-0.352332	ID.9
0	20.0027	wild	9.4	0	0.690571	ID.63
0	20.0055	wild	8.76	0	0.690696	ID.63
0	20.0082	wild	8.18	0	0.690821	ID.63
0	14.9979	wild	3.14	0	0.426903	ID.62
0	8.46817	wild	2.96	0	-0.0964825	ID.28
0	20.1369	wild	7.71	0	0.696691	ID.71
0	6.46954	wild	7.44	0	-0.342985	ID.9
0	15.0007	wild	9.53	0	0.42707	ID.62
0	20.0192	wild	7.41	0	0.691322	ID.63
0	20.1396	wild	10.69	0	0.696816	ID.71
0	6.47228	wild	10.64	0	-0.342597	ID.9
0	20.1451	wild	10.52	0	0.697065	ID.71
0	6.47775	wild	10.58	0	-0.341823	ID.9
0	34.653	wild	6.71	0	1.19373	ID.4
3	1.65366	wild	2.8	0	-1.59204	ID.27
0	9.65366	wild	2.96	0	0.0234886	ID.83
0	9.56879	wild	1.03	0	0.0154028	ID.17
0	34.6557	wild	10.74	0	1.19381	ID.4
12	1.6564	wild	8.21	0	-1.59052	ID.27
0	34.6585	wild	9.83	0	1.19388	ID.4
22	1.65914	wild	7.52	0	-1.58901	ID.27
0	34.6639	wild	10.07	0	1.19402	ID.4
15	1.66461	wild	10.85	0	-1.58599	ID.27
0	34.6667	wild	9.58	0	1.1941	ID.4
3	1.66735	wild	7.28	0	-1.58449	ID.27
0	29.9986	wild	6.09	0	1.06167	ID.64
0	30.0014	wild	10.43	0	1.06175	ID.64
0	30.0041	wild	11.2	0	1.06184	ID.64
0	9.72485	wild	0.73	0	0.0302157	ID.83
0	30.0068	wild	10.71	0	1.06192	ID.64
0	30.0096	wild	9.97	0	1.062	ID.64
0	30.0233	wild	5.26	0	1.06242	ID.64
0	30.0287	wild	6.54	0	1.06259	ID.64
0	20.2601	wild	7.94	0	0.702276	ID.71
1	6.59274	wild	7.8	0	-0.325712	ID.9
0	34.8008	wild	0.68	0	1.19763	ID.4
0	1.80151	wild	0.52	0	-1.51363	ID.27
0	34.8036	wild	8.9	0	1.19771	ID.4
0	1.80424	wild	6.76	0	-1.51224	ID.27
0	64.8268	wild	7.08	0	1.76724	ID.34
13	2.41205	wild	5.9	0	-1.24639	ID.21
0	64.8296	wild	9.9	0	1.76728	ID.34
24	2.41478	wild	8.25	0	-1.24536	ID.21
0	64.835	wild	9.89	0	1.76736	ID.34
5	2.42026	wild	8.24	0	-1.24328	ID.21
0	64.8378	wild	9.43	0	1.7674	ID.34
4	2.423	wild	7.86	0	-1.24225	ID.21
0	64.8433	wild	5.52	0	1.76747	ID.34
3	2.42847	wild	4.6	0	-1.24018	ID.21
0	6.69952	wild	4.48	0	-0.311	ID.9
0	14.9979	wild	2.41	0	0.426903	ID.22
0	47.4168	wild	4.24	0	1.48088	ID.3
0	1.41821	wild	3.22	0	-1.73268	ID.48
0	20.4244	wild	9.76	0	0.709671	ID.71
16	6.75702	wild	9.6	0	-0.303176	ID.9
0	30.204	wild	4.57	0	1.06791	ID.64
0	30.2259	wild	8.99	0	1.06858	ID.64
0	8.8104	wild	1.9	0	-0.0602057	ID.28
3	8.81314	wild	9.62	0	-0.0599212	ID.28
1	8.81862	wild	10.18	0	-0.0593525	ID.28
0	8.82136	wild	9.88	0	-0.0590682	ID.28
9	5.03491	wild	4.16	0	-0.572548	ID.8
0	35.0363	wild	4.75	0	1.20381	ID.4
19	2.03696	wild	3.95	0	-1.40116	ID.27
0	30.3217	wild	7.33	0	1.07148	ID.64
0	30.3244	wild	10.85	0	1.07156	ID.64
0	32.5503	wild	3.05	0	1.13642	ID.59
0	0.550308	wild	1.72	0	-2.5995	ID.87
0	30.1684	wild	4.41	0	1.06684	ID.1
0	30.1711	wild	3.06	0	1.06692	ID.1
0	35.0801	wild	3.36	0	1.20495	ID.4
9	2.08077	wild	2.8	0	-1.38167	ID.27
0	20.4736	wild	8.63	0	0.711877	ID.89
9	6.94045	wild	7.35	0	-0.27865	ID.9
14	6.94593	wild	10.27	0	-0.277927	ID.9
26	2.69952	wild	4.75	0	-1.14329	ID.21
0	8.95551	wild	9.82	0	-0.0452479	ID.28
36	2.70226	wild	8.66	0	-1.14237	ID.21
3	8.95825	wild	10.38	0	-0.044968	ID.28
0	65.1198	wild	7.22	0	1.77137	ID.34
15	2.705	wild	6.02	0	-1.14144	ID.21
0	65.1225	wild	10.4	0	1.77141	ID.34
9	2.70773	wild	8.66	0	-1.14051	ID.21
18	2.71047	wild	8.62	0	-1.13959	ID.21
0	65.128	wild	9.81	0	1.77148	ID.34
16	2.71321	wild	8.21	0	-1.13866	ID.21
0	65.1307	wild	10.19	0	1.77152	ID.34
16	2.71595	wild	8.49	0	-1.13774	ID.21
0	43.1403	wild	3.35	0	1.39433	ID.23
2	5.14168	wild	2.99	0	-0.553333	ID.8
14	5.14442	wild	8.49	0	-0.552845	ID.8
0	30.2423	wild	9.4	0	1.06908	ID.1
0	43.1485	wild	10.68	0	1.39451	ID.23
6	5.1499	wild	9.27	0	-0.551871	ID.8
0	30.245	wild	9.68	0	1.06916	ID.1
0	43.1513	wild	10.7	0	1.39456	ID.23
9	5.15264	wild	9.29	0	-0.551385	ID.8
0	30.4586	wild	0.33	0	1.0756	ID.64
0	30.4613	wild	6.86	0	1.07568	ID.64
0	7.02259	wild	0.5	0	-0.267877	ID.9
8	7.02533	wild	6.19	0	-0.26752	ID.9
0	30.0041	wild	8.49	0	1.06184	ID.73
0	10.204	wild	3.27	0	0.074252	ID.83
0	10.2067	wild	8.98	0	0.0744976	ID.83
0	30.1054	wild	10.36	0	1.06492	ID.18
0	10.2122	wild	5.09	0	0.0749887	ID.83
11	7.0527	wild	9.69	0	-0.263959	ID.9
0	35.2307	wild	4.38	0	1.20887	ID.4
5	2.23135	wild	3.65	0	-1.3177	ID.27
1	7.06913	wild	4.51	0	-0.261828	ID.9
0	20.7365	wild	3.58	0	0.723557	ID.71
0	30.5216	wild	1.44	0	1.07749	ID.64
0	30.5243	wild	9.92	0	1.07757	ID.64
0	10.256	wild	4.62	0	0.0789081	ID.83
0	31.2252	wild	9.41	0	1.09836	ID.44
0	31.2827	wild	4.92	0	1.10005	ID.44
22	2.97604	wild	7.63	0	-1.054	ID.21
0	15.5318	wild	3.64	0	0.458931	ID.22
6	2.987	wild	1.48	0	-1.05064	ID.21
38	2.98973	wild	8.47	0	-1.0498	ID.21
0	31.3155	wild	4.26	0	1.10101	ID.44
4	10.4476	wild	10.49	0	0.0958606	ID.83
16	4.96646	wild	5.23	0	-0.585081	ID.88
0	1.14168	wild	0.69	0	-1.93128	ID.14
0	31.0144	wild	3.88	0	1.09216	ID.64
0	31.0171	wild	9.49	0	1.09224	ID.64
0	31.0198	wild	10.33	0	1.09232	ID.64
5	5.77139	wild	2.5	0	-0.447545	ID.8
6	5.77413	wild	8.25	0	-0.447111	ID.8
0	30.0123	wild	8.84	0	1.06209	ID.19
0	30.0151	wild	8.99	0	1.06217	ID.19
0	30.0178	wild	8.57	0	1.06225	ID.19
0	21.3251	wild	1.31	0	0.749188	ID.71
2	7.66324	wild	9.89	0	-0.187937	ID.9
1	7.66598	wild	10.64	0	-0.18761	ID.9
1	7.66872	wild	10.41	0	-0.187283	ID.9
0	7.6961	wild	9.45	0	-0.18402	ID.9
0	21.3662	wild	8.58	0	0.750949	ID.71
0	21.3689	wild	9.73	0	0.751066	ID.71
0	31.1814	wild	5.48	0	1.09708	ID.64
0	10.9049	wild	1.64	0	0.13508	ID.83
0	31.1841	wild	9.26	0	1.09716	ID.64
0	65.9083	wild	5.89	0	1.78239	ID.34
0	3.4935	wild	4.62	0	-0.907212	ID.21
1	10.9131	wild	9.33	0	0.13577	ID.83
0	10.924	wild	3.21	0	0.136688	ID.83
0	10.9268	wild	7.45	0	0.136918	ID.83
0	17.3826	wild	1.72	0	0.562014	ID.58
5	9.86174	wild	5.18	0	0.0430151	ID.28
0	66.026	wild	9.98	0	1.78402	ID.34
0	17.3854	wild	2.41	0	0.562158	ID.58
4	3.61396	wild	8.19	0	-0.87617	ID.21
13	3.6167	wild	12.23	0	-0.875476	ID.21
8	3.61944	wild	7.93	0	-0.874783	ID.21
7	3.62218	wild	7.58	0	-0.874091	ID.21
0	9.87543	wild	4.41	0	0.0442852	ID.28
7	3.62491	wild	7.2	0	-0.873399	ID.21
0	20.2136	wild	0.31	0	0.70017	ID.65
3	7.91239	wild	5.93	0	-0.158642	ID.9
0	21.5825	wild	8.69	0	0.760172	ID.71
2	7.9206	wild	8.47	0	-0.157692	ID.9
0	21.4648	wild	3.29	0	0.755163	ID.89
0	3.10198	wild	7.74	0	-1.01605	ID.14
0	3.10472	wild	7.41	0	-1.01524	ID.14
0	3.10746	wild	7.63	0	-1.01443	ID.14
0	3.1102	wild	0.88	0	-1.01363	ID.14
0	3.19507	wild	3.99	0	-0.988974	ID.36
0	3.70705	wild	6.21	0	-0.852883	ID.21
0	3.70979	wild	8.12	0	-0.852207	ID.21
0	3.71253	wild	8.34	0	-0.851532	ID.21
0	3.718	wild	7.62	0	-0.850182	ID.21
0	3.72074	wild	7.49	0	-0.849508	ID.21
0	3.72348	wild	8.27	0	-0.848835	ID.21
0	3.14579	wild	7.19	0	-1.00321	ID.14
0	66.0424	wild	1.13	0	1.78425	ID.34
0	30.0014	wild	6.25	0	1.06175	ID.26
0	21.3114	wild	6.2	0	0.7486	ID.77
0	21.7933	wild	0.75	0	0.769072	ID.71
0	21.3936	wild	3.38	0	0.752122	ID.77
0	21.3963	wild	9.01	0	0.752239	ID.77
0	21.4045	wild	1.21	0	0.75259	ID.77
0	21.4073	wild	8.93	0	0.752707	ID.77
0	21.41	wild	9.39	0	0.752825	ID.77
1	10.1547	wild	4.11	0	0.069819	ID.28
2	10.1574	wild	9.92	0	0.0700658	ID.28
0	10.1602	wild	2.14	0	0.0703126	ID.28
0	31.2142	wild	7.04	0	1.09804	ID.18
0	20.6023	wild	8.42	0	0.717614	ID.65
0	3.62765	wild	0.88	0	-0.872708	ID.21
0	33.0705	wild	6.38	0	1.15094	ID.64
0	18.245	wild	4.62	0	0.606353	ID.62
0	11.7262	wild	9	0	0.201574	ID.28
2	11.729	wild	10.21	0	0.201787	ID.28
0	11.7317	wild	2.7	0	0.202001	ID.28
0	12.8186	wild	3.13	0	0.283132	ID.17
0	12.8214	wild	9.37	0	0.283328	ID.17
1	11.7536	wild	4.34	0	0.203709	ID.28
1	11.7563	wild	10.34	0	0.203922	ID.28
0	11.7591	wild	9.82	0	0.204135	ID.28
0	12.8487	wild	1.65	0	0.285281	ID.17
3	7.93703	wild	8.85	0	-0.155795	ID.8
1	7.93977	wild	9.14	0	-0.155479	ID.8
0	12.8597	wild	7.44	0	0.286061	ID.17
2	12.8624	wild	10.28	0	0.286256	ID.17
0	11.7892	wild	5.93	0	0.206477	ID.28
0	67.9562	wild	1.1	0	1.81041	ID.34
0	67.9589	wild	10.31	0	1.81045	ID.34
8	5.54415	wild	9.21	0	-0.484327	ID.21
0	67.9617	wild	10.51	0	1.81048	ID.34
16	5.54689	wild	9.54	0	-0.483875	ID.21
13	5.54962	wild	7.59	0	-0.483423	ID.21
0	67.9699	wild	7.54	0	1.81059	ID.34
6	5.5551	wild	6.64	0	-0.48252	ID.21
0	67.9726	wild	10.74	0	1.81063	ID.34
16	5.55784	wild	9.52	0	-0.482069	ID.21
0	50.4832	wild	2.31	0	1.53826	ID.3
0	4.48734	wild	8.83	0	-0.677972	ID.48
0	18.152	wild	2.83	0	0.601669	ID.22
0	18.1547	wild	8.78	0	0.601807	ID.22
1	11.8658	wild	9.31	0	0.212412	ID.28
2	11.8686	wild	9.46	0	0.212624	ID.28
1	8.03285	wild	9.48	0	-0.144806	ID.8
0	11.8741	wild	1.23	0	0.213046	ID.28
1	11.8768	wild	7.28	0	0.213257	ID.28
0	68.0383	wild	2.74	0	1.81151	ID.34
5	5.62355	wild	2.44	0	-0.471307	ID.21
20	5.62628	wild	9.16	0	-0.470861	ID.21
8	5.62902	wild	8.93	0	-0.470416	ID.21
3	5.63176	wild	4.16	0	-0.469971	ID.21
0	8.04654	wild	5.01	0	-0.143247	ID.8
11	8.04928	wild	9.31	0	-0.142935	ID.8
2	8.05202	wild	7.19	0	-0.142624	ID.8
0	46.0507	wild	1.4	0	1.45411	ID.23
0	5.05133	wild	5.05	0	-0.569566	ID.27
0	32.95	wild	4.93	0	1.14759	ID.66
0	13.0568	wild	3.21	0	0.299991	ID.83
0	13.0595	wild	11.96	0	0.300183	ID.83
1	12.9747	wild	8.95	0	0.294212	ID.17
0	13.0623	wild	9.58	0	0.300374	ID.83
2	12.9774	wild	9.99	0	0.294406	ID.17
3	12.9856	wild	9.08	0	0.294985	ID.17
0	5.15537	wild	10.97	0	-0.550898	ID.36
0	12.9884	wild	0.67	0	0.295178	ID.17
1	11.9151	wild	7.47	0	0.216207	ID.28
0	11.9179	wild	8.67	0	0.216418	ID.28
5	11.9233	wild	9.92	0	0.216838	ID.28
1	11.9288	wild	4.36	0	0.217259	ID.28
0	32.9856	wild	7.4	0	1.14858	ID.66
0	18.2286	wild	4.47	0	0.605528	ID.22
0	20	wild	2.01	0	0.690445	ID.37
0	20.0027	wild	9.08	0	0.690571	ID.37
0	23.6057	wild	1.38	0	0.842222	ID.71
0	0.520192	wild	0.78	0	-2.65104	ID.29
0	23.6085	wild	9.07	0	0.842328	ID.71
9	0.52293	wild	5.12	0	-2.64623	ID.29
0	23.6112	wild	9.32	0	0.842434	ID.71
31	0.525667	wild	5.27	0	-2.64145	ID.29
14	0.528405	wild	5.23	0	-2.63669	ID.29
0	23.614	wild	9.25	0	0.842541	ID.71
5	0.531143	wild	5.19	0	-2.63196	ID.29
0	23.6167	wild	9.18	0	0.842647	ID.71
1	9.94935	wild	10.32	0	0.0511138	ID.9
27	0.533881	wild	5.36	0	-2.62725	ID.29
0	23.6222	wild	9.01	0	0.842859	ID.71
53	0.539357	wild	5.57	0	-2.61791	ID.29
20	0.542094	wild	5.73	0	-2.61327	ID.29
0	23.6277	wild	10.14	0	0.843071	ID.71
0	23.6304	wild	8.47	0	0.843177	ID.71
31	0.544832	wild	4.79	0	-2.60866	ID.29
0	23.6331	wild	8.74	0	0.843283	ID.71
13	0.54757	wild	4.94	0	-2.60407	ID.29
8	9.97125	wild	4.62	0	0.0531273	ID.9
4	9.97399	wild	10.18	0	0.0533787	ID.9
0	13.0541	wild	3.76	0	0.299799	ID.17
31	5.73032	wild	9.84	0	-0.454084	ID.21
26	5.73306	wild	8.89	0	-0.453647	ID.21
0	13.1554	wild	0.08	0	0.306877	ID.83
0	13.1581	wild	10.49	0	0.307067	ID.83
0	13.1608	wild	10.46	0	0.307258	ID.83
0	12.0411	wild	1.43	0	0.225835	ID.28
0	13.117	wild	0.23	0	0.304205	ID.17
4	13.1198	wild	10.07	0	0.304396	ID.17
3	13.1225	wild	9.82	0	0.304587	ID.17
0	13.2156	wild	9.71	0	0.311059	ID.83
6	10.0561	wild	8.84	0	0.0608882	ID.9
0	10.0589	wild	9.79	0	0.0611374	ID.9
6	10.0616	wild	9.88	0	0.0613866	ID.9
5	10.0643	wild	8.79	0	0.0616357	ID.9
6	8.22998	wild	9.37	0	-0.122607	ID.8
2	8.23272	wild	9.65	0	-0.122303	ID.8
0	10.0726	wild	2.92	0	0.0623827	ID.9
0	46.2669	wild	5.23	0	1.4584	ID.23
0	23.6441	wild	0.95	0	0.843708	ID.89
0	5.2731	wild	1.54	0	-0.530224	ID.14
0	18.653	wild	2.95	0	0.6266	ID.62
1	12.1287	wild	6.27	0	0.232473	ID.28
0	27.8795	wild	0.54	0	0.994589	ID.47
0	7.7974	wild	2.47	0	-0.172046	ID.88
14	0.536619	wild	5.09	0	-2.62257	ID.29
0	22.7105	wild	1.65	0	0.806819	ID.7
0	30.0014	wild	5.32	0	1.06175	ID.86
34	2.83915	wild	4.63	0	-1.09712	ID.29
60	2.84189	wild	6.68	0	-1.09623	ID.29
87	2.84463	wild	8.63	0	-1.09535	ID.29
14	2.8501	wild	7.47	0	-1.09359	ID.29
91	2.85284	wild	7.06	0	-1.09271	ID.29
77	2.85558	wild	6.88	0	-1.09183	ID.29
42	0.865161	wild	4	0	-2.18523	ID.5
43	0.867899	wild	4.6	0	-2.18233	ID.5
29	0.873374	wild	2.17	0	-2.17658	ID.5
41	0.876112	wild	3.43	0	-2.17371	ID.5
79	0.87885	wild	7.8	0	-2.17085	ID.5
76	0.881588	wild	7.15	0	-2.168	ID.5
64	0.887064	wild	8.04	0	-2.16233	ID.5
63	0.889802	wild	5.23	0	-2.15951	ID.5
66	0.892539	wild	6.9	0	-2.1567	ID.5
37	2.91307	wild	2.92	0	-1.07358	ID.29
93	2.91581	wild	8.36	0	-1.07272	ID.29
47	2.91855	wild	5.07	0	-1.07186	ID.29
0	0.944559	wild	7.64	0	-2.10483	ID.5
73	1.58248	wild	6.86	0	-1.63233	ID.33
72	1.58522	wild	7.03	0	-1.63074	ID.33
48	1.59069	wild	6.35	0	-1.62759	ID.33
72	1.59343	wild	5.28	0	-1.62601	ID.33
77	1.59617	wild	7.75	0	-1.62444	ID.33
110	1.60164	wild	8.07	0	-1.6213	ID.33
103	1.60438	wild	8.25	0	-1.61974	ID.33
103	1.60712	wild	8.15	0	-1.61818	ID.33
0	7.96167	wild	6.03	0	-0.152956	ID.36
0	23.3812	wild	3.17	0	0.833472	ID.7
0	1.13073	wild	5.1	0	-1.9401	ID.45
0	10.9049	wild	0.45	0	0.13508	ID.8
1	12.7502	wild	6.76	0	0.27823	ID.9
0	12.7584	wild	9	0	0.27882	ID.9
0	70.9377	wild	6.33	0	1.84973	ID.34
47	1.36071	wild	5.03	0	-1.77058	ID.5
99	0.91718	wild	6.11	0	-2.13176	ID.11
93	0.919918	wild	7.2	0	-2.12903	ID.11
91	0.925394	wild	7.4	0	-2.1236	ID.11
93	0.928131	wild	5.76	0	-2.1209	ID.11
0	29.0924	wild	10.21	0	1.03358	ID.75
0	3.52088	wild	7.53	0	-0.900064	ID.29
8	8.69541	wild	5.83	0	-0.0722351	ID.21
11	3.55373	wild	0.94	0	-0.891559	ID.29
32	3.55921	wild	3.17	0	-0.890149	ID.29
63	3.62218	wild	4.87	0	-0.874091	ID.29
0	26.7105	wild	5.93	0	0.955365	ID.71
36	0.681725	wild	4.73	0	-2.40342	ID.30
54	0.687201	wild	4.3	0	-2.39609	ID.30
44	0.692676	wild	4.47	0	-2.38883	ID.30
38	0.695414	wild	3.2	0	-2.38521	ID.30
0	18.8583	wild	2.84	0	0.636625	ID.28
1	6.26968	wild	1.62	0	-0.371718	ID.29
76	4.27652	wild	5.43	0	-0.722033	ID.5
87	4.27926	wild	6.4	0	-0.721447	ID.5
19	4.282	wild	4.6	0	-0.720861	ID.5
45	4.28747	wild	4.8	0	-0.719691	ID.5
33	4.29021	wild	5.13	0	-0.719107	ID.5
9	4.30938	wild	1.77	0	-0.715025	ID.5
60	4.31211	wild	6.26	0	-0.714444	ID.5
76	4.31485	wild	5.67	0	-0.713863	ID.5
0	4.66804	wild	0.94	0	-0.641824	ID.33
52	4.67077	wild	6.17	0	-0.641287	ID.33
5	6.36003	wild	1.3	0	-0.358617	ID.29
8	6.36277	wild	4.17	0	-0.358223	ID.29
0	10.0287	wild	1.51	0	0.0583918	ID.49
45	4.82136	wild	4.26	0	-0.612233	ID.33
35	4.82409	wild	3.1	0	-0.611713	ID.33
18	6.49418	wild	9.93	0	-0.339504	ID.29
31	6.49692	wild	6.04	0	-0.339118	ID.29
27	2.24778	wild	10.4	0	-1.31098	ID.53
33	6.49966	wild	6.87	0	-0.338732	ID.29
22	2.25325	wild	7.07	0	-1.30875	ID.53
53	6.50513	wild	7.77	0	-0.337961	ID.29
68	6.50787	wild	7.23	0	-0.337576	ID.29
24	2.25599	wild	10	0	-1.30764	ID.53
32	6.51061	wild	7.17	0	-0.337191	ID.29
12	6.51335	wild	7.43	0	-0.336806	ID.29
40	2.26146	wild	9.23	0	-1.30542	ID.53
8	2.2642	wild	1.97	0	-1.30431	ID.53
30	6.51882	wild	10.93	0	-0.336036	ID.29
69	2.26694	wild	7.97	0	-1.30321	ID.53
66	2.26968	wild	8.6	0	-1.3021	ID.53
27	6.5243	wild	8.28	0	-0.335268	ID.29
38	2.27242	wild	7.89	0	-1.301	ID.53
47	6.52704	wild	11.5	0	-0.334883	ID.29
22	6.52977	wild	12.16	0	-0.334499	ID.29
14	2.27789	wild	2.13	0	-1.29879	ID.53
19	4.86242	wild	6.22	0	-0.604466	ID.33
55	4.86516	wild	9.14	0	-0.603951	ID.33
40	4.8679	wild	9.74	0	-0.603436	ID.33
39	6.53525	wild	10.74	0	-0.333732	ID.29
39	4.87064	wild	10.67	0	-0.602921	ID.33
60	4.87337	wild	9.01	0	-0.602406	ID.33
33	4.87611	wild	11.33	0	-0.601892	ID.33
84	2.29158	wild	9.07	0	-1.29331	ID.53
80	2.29432	wild	10.04	0	-1.29221	ID.53
33	4.87885	wild	9.7	0	-0.601378	ID.33
39	2.29706	wild	9.17	0	-1.29112	ID.53
59	2.29979	wild	10.07	0	-1.29003	ID.53
47	4.8898	wild	8.53	0	-0.599325	ID.33
28	4.89254	wild	7.06	0	-0.598812	ID.33
40	4.89528	wild	9.81	0	-0.5983	ID.33
0	29.6537	wild	8.8	0	1.05108	ID.71
29	4.90349	wild	5.07	0	-0.596765	ID.33
46	4.90623	wild	10.43	0	-0.596254	ID.33
6	10.6913	wild	11.97	0	0.116971	ID.68
0	29.6646	wild	6.74	0	1.05142	ID.71
32	6.58179	wild	10.67	0	-0.327234	ID.29
16	6.58453	wild	8.07	0	-0.326853	ID.29
0	25.5825	wild	1.35	0	0.915856	ID.58
43	2.39288	wild	11.16	0	-1.2537	ID.53
24	4.64613	wild	9.93	0	-0.64613	ID.5
0	23.8084	wild	6.2	0	0.850047	ID.39
37	6.65572	wild	11.6	0	-0.317007	ID.29
24	4.99384	wild	5.86	0	-0.580047	ID.33
31	4.99658	wild	10.52	0	-0.579546	ID.33
29	5.00205	wild	10.57	0	-0.578543	ID.33
22	5.00479	wild	11.2	0	-0.578042	ID.33
12	2.2642	wild	5.95	0	-1.30431	ID.61
50	2.26694	wild	8.25	0	-1.30321	ID.61
0	2.77618	wild	1.23	0	-1.11765	ID.15
0	2.77892	wild	10.37	0	-1.11675	ID.15
0	10.7817	wild	3.78	0	0.124676	ID.68
0	44.282	wild	10.59	0	1.41825	ID.4
5	5.32786	wild	4.3	0	-0.520764	ID.5
0	34.601	wild	3.36	0	1.19236	ID.86
0	44.9418	wild	0.73	0	1.43179	ID.4
3	4.94456	wild	2.8	0	-0.589128	ID.31
0	34.6174	wild	5.06	0	1.19279	ID.86
0	15.7153	wild	0.59	0	0.469682	ID.51
0	24.1342	wild	1.13	0	0.862492	ID.50
1	11.0116	wild	8.87	0	0.144002	ID.49
0	34.6858	wild	1.7	0	1.1946	ID.86
0	18.9432	wild	7.57	0	0.640737	ID.28
0	7.53183	wild	7.5	0	-0.203776	ID.29
1	18.9541	wild	7.1	0	0.641266	ID.28
0	11.1814	wild	5.67	0	0.15801	ID.49
8	11.1841	wild	6.12	0	0.158234	ID.49
0	11.1869	wild	6.2	0	0.158458	ID.49
40	5.60712	wild	6.92	0	-0.473986	ID.5
1	11.1896	wild	3.77	0	0.158682	ID.49
22	5.60986	wild	8.95	0	-0.473539	ID.5
0	11.1923	wild	4.73	0	0.158906	ID.49
2	11.1978	wild	6.73	0	0.159354	ID.49
24	5.61807	wild	4.65	0	-0.472199	ID.5
2	11.2005	wild	4.8	0	0.159578	ID.49
1	11.2033	wild	8.3	0	0.159802	ID.49
33	5.62355	wild	6.52	0	-0.471307	ID.5
30	5.62628	wild	7.39	0	-0.470861	ID.5
24	5.63176	wild	5.6	0	-0.469971	ID.5
3	7.70431	wild	4.6	0	-0.183043	ID.29
0	11.3183	wild	4.76	0	0.169152	ID.49
2	11.321	wild	9.8	0	0.169373	ID.49
1	11.499	wild	9.17	0	0.183655	ID.49
0	28.052	wild	3.37	0	1.00024	ID.7
0	28.0548	wild	8.64	0	1.00033	ID.7
0	4.06297	wild	5.48	0	-0.768938	ID.15
29	6.50787	wild	7.8	0	-0.337576	ID.33
0	6.51061	wild	8.07	0	-0.337191	ID.33
35	6.51335	wild	7.83	0	-0.336806	ID.33
23	6.51608	wild	6.84	0	-0.336421	ID.33
29	6.52156	wild	7.26	0	-0.335652	ID.33
35	6.5243	wild	5.9	0	-0.335268	ID.33
26	6.52704	wild	7	0	-0.334883	ID.33
0	6.67762	wild	1.27	0	-0.313999	ID.33
4	8.34771	wild	10.43	0	-0.109602	ID.29
0	31.4387	wild	1.37	0	1.1046	ID.71
0	31.447	wild	8.4	0	1.10484	ID.71
0	8.3614	wild	8.97	0	-0.108102	ID.29
0	8.36413	wild	5.13	0	-0.107802	ID.29
27	6.705	wild	6.77	0	-0.310252	ID.33
8	6.37098	wild	6.03	0	-0.357042	ID.5
11	6.70773	wild	11.61	0	-0.309879	ID.33
0	19.8001	wild	3.38	0	0.681249	ID.28
5	4.12868	wild	2.74	0	-0.754248	ID.53
14	4.13142	wild	10.78	0	-0.753641	ID.53
13	2.81177	wild	6.75	0	-1.10599	ID.20
0	8.45175	wild	8.94	0	-0.0982605	ID.29
0	31.54	wild	9.8	0	1.10755	ID.71
0	8.45448	wild	9.87	0	-0.0979639	ID.29
0	76.063	wild	5.97	0	1.9136	ID.34
18	6.48597	wild	9.73	0	-0.340663	ID.5
7	6.48871	wild	11.87	0	-0.340276	ID.5
4	6.49418	wild	5.2	0	-0.339504	ID.5
7	2.91307	wild	6	0	-1.07358	ID.20
0	12.104	wild	7.15	0	0.230611	ID.49
0	76.1177	wild	11.2	0	1.91426	ID.34
2	6.53799	wild	11.13	0	-0.333348	ID.5
0	17.9658	wild	7.4	0	0.592229	ID.9
4	2.96783	wild	9.03	0	-1.05653	ID.20
0	12.6516	wild	3.87	0	0.271124	ID.68
1	12.6543	wild	10.05	0	0.271322	ID.68
1	4.67077	wild	0.57	0	-0.641287	ID.15
0	16.8925	wild	3.53	0	0.535828	ID.51
0	76.1834	wild	2.8	0	1.91505	ID.34
0	76.1862	wild	9.47	0	1.91508	ID.34
5	6.60643	wild	10.6	0	-0.323812	ID.5
0	76.1916	wild	8.53	0	1.91515	ID.34
0	12.7064	wild	11.4	0	0.275079	ID.68
0	76.2081	wild	7.49	0	1.91535	ID.34
0	31.7481	wild	0.67	0	1.11357	ID.71
0	31.7509	wild	10.21	0	1.11365	ID.71
0	31.7563	wild	10.13	0	1.11381	ID.71
0	31.7591	wild	9.42	0	1.11389	ID.71
0	31.7618	wild	9.85	0	1.11396	ID.71
1	8.67625	wild	6.37	0	-0.0742554	ID.29
0	16.9829	wild	5.76	0	0.540712	ID.51
5	7.03628	wild	6.33	0	-0.266094	ID.33
0	54.2861	wild	8.27	0	1.60476	ID.23
0	54.2888	wild	8.05	0	1.6048	ID.23
14	7.04175	wild	7.23	0	-0.265382	ID.33
2	7.04449	wild	6.67	0	-0.265026	ID.33
0	31.8084	wild	9.45	0	1.1153	ID.71
0	8.72279	wild	8.05	0	-0.0693566	ID.29
0	12.8104	wild	0.75	0	0.282545	ID.68
0	41.6044	wild	6.14	0	1.36114	ID.64
0	31.0445	wild	2.57	0	1.09305	ID.74
2	6.7707	wild	0.9	0	-0.301323	ID.5
5	6.77344	wild	9.97	0	-0.300953	ID.5
0	41.2485	wild	4.3	0	1.35327	ID.18
7	6.77618	wild	10.7	0	-0.300582	ID.5
0	41.2512	wild	6.16	0	1.35333	ID.18
11	4.52841	wild	8.64	0	-0.669631	ID.53
0	41.2567	wild	9.68	0	1.35345	ID.18
0	20.2026	wild	9.9	0	0.699674	ID.28
13	4.53114	wild	10.41	0	-0.669077	ID.53
0	20.2053	wild	10.18	0	0.699798	ID.28
0	20.2108	wild	5.44	0	0.700046	ID.28
4	4.54209	wild	8.03	0	-0.666867	ID.53
1	31.8877	wild	3.89	0	1.11759	ID.71
0	41.6756	wild	5.1	0	1.3627	ID.64
0	8.86516	wild	3.92	0	-0.0545325	ID.29
3	4.62149	wild	5.63	0	-0.650999	ID.53
2	4.62423	wild	9.35	0	-0.650457	ID.53
0	41.744	wild	2.17	0	1.3642	ID.64
0	12.4873	wild	3.4	0	0.259157	ID.49
0	25.3936	wild	5.02	0	0.90907	ID.52
0	20.3368	wild	5.73	0	0.705734	ID.28
0	4.6653	wild	5.42	0	-0.642361	ID.53
1	20.3395	wild	8.45	0	0.705858	ID.28
0	6.94319	wild	10.38	0	-0.278288	ID.5
2	6.94593	wild	9.87	0	-0.277927	ID.5
1	76.5366	wild	4.73	0	1.91928	ID.34
0	4.70363	wild	4.17	0	-0.634868	ID.53
0	32.0876	wild	2.76	0	1.12331	ID.71
0	9.00753	wild	9.64	0	-0.0399446	ID.29
0	9.01027	wild	6.38	0	-0.0396663	ID.29
0	27.1047	wild	5.79	0	0.968781	ID.70
0	27.1075	wild	10.9	0	0.968874	ID.70
1	27.1102	wild	10.59	0	0.968966	ID.70
0	6.62834	wild	7.93	0	-0.320782	ID.31
2	6.63107	wild	8.3	0	-0.320403	ID.31
0	25.5003	wild	2.57	0	0.912912	ID.13
0	25.5031	wild	11.25	0	0.91301	ID.13
0	13.1417	wild	7.9	0	0.305923	ID.68
0	31.3648	wild	7.67	0	1.10245	ID.74
0	32.1506	wild	0.3	0	1.1251	ID.71
1	32.1561	wild	2.23	0	1.12526	ID.71
1	26.7871	wild	5.33	0	0.957989	ID.22
0	4.82957	wild	9.85	0	-0.610674	ID.53
4	4.83231	wild	9.3	0	-0.610155	ID.53
3	4.83504	wild	7.33	0	-0.609637	ID.53
0	25.9466	wild	5.8	0	0.928798	ID.40
1	9.11978	wild	0.42	0	-0.0286042	ID.29
2	13.2047	wild	4.3	0	0.3103	ID.68
2	13.2074	wild	11.32	0	0.31049	ID.68
3	9.13895	wild	5.71	0	-0.026682	ID.29
2	9.14442	wild	11.12	0	-0.0261336	ID.29
15	7.15674	wild	7.27	0	-0.25055	ID.5
1	76.7447	wild	0.27	0	1.92177	ID.34
8	7.16496	wild	7.63	0	-0.2495	ID.5
0	76.7529	wild	3.98	0	1.92187	ID.34
0	27.2717	wild	6.64	0	0.974406	ID.70
14	4.94182	wild	5.85	0	-0.589635	ID.53
0	20	wild	2.21	0	0.690445	ID.35
0	32.2957	wild	0.1	0	1.12923	ID.71
0	20.0027	wild	3.73	0	0.690571	ID.35
0	20.6407	wild	4.98	0	0.719316	ID.28
0	20.6434	wild	4.8	0	0.719438	ID.28
0	17.525	wild	2.76	0	0.569483	ID.51
0	17.5359	wild	5.34	0	0.570055	ID.51
0	20.6571	wild	6.85	0	0.720045	ID.28
0	17.5387	wild	8.44	0	0.570198	ID.51
0	20.6598	wild	10.03	0	0.720166	ID.28
0	17.5414	wild	6.16	0	0.570341	ID.51
0	26.3765	wild	2.07	0	0.943842	ID.25
0	20.6982	wild	0.57	0	0.721863	ID.28
1	5.02943	wild	7.28	0	-0.573544	ID.53
0	26.9979	wild	6.4	0	0.965167	ID.22
0	27.0007	wild	0.3	0	0.96526	ID.22
0	76.8652	wild	1.07	0	1.92321	ID.34
1	5.03217	wild	6.55	0	-0.573046	ID.53
0	36.4517	wild	11.24	0	1.24007	ID.47
4	5.03765	wild	7.64	0	-0.57205	ID.53
2	5.05407	wild	4.73	0	-0.569069	ID.53
0	36.4736	wild	1.5	0	1.24062	ID.47
0	27.0226	wild	2.93	0	0.966002	ID.22
0	27.0253	wild	3.5	0	0.966095	ID.22
4	5.05681	wild	7.93	0	-0.568574	ID.53
0	9.30869	wild	2.9	0	-0.00983073	ID.29
2	7.31554	wild	5.91	0	-0.230456	ID.5
2	7.64956	wild	2.34	0	-0.189574	ID.33
0	30.6858	wild	0.77	0	1.08241	ID.69
0	30.6886	wild	4.8	0	1.08249	ID.69
0	7.65229	wild	7.72	0	-0.189247	ID.33
0	30.6913	wild	2.23	0	1.08257	ID.69
0	27.0445	wild	3.27	0	0.966744	ID.22
0	9.32786	wild	2.3	0	-0.0079475	ID.29
2	9.3306	wild	6.26	0	-0.00767879	ID.29
0	27.0472	wild	4.1	0	0.966837	ID.22
0	30.705	wild	0.79	0	1.08298	ID.69
0	6.94319	wild	0.27	0	-0.278288	ID.31
0	17.692	wild	1.8	0	0.578168	ID.51
0	42.2669	wild	11.18	0	1.3756	ID.64
1	20.846	wild	9.9	0	0.72838	ID.28
0	27.1567	wild	6.26	0	0.970537	ID.22
1	77.0376	wild	1.57	0	1.92526	ID.34
0	26.2916	wild	2.93	0	0.940891	ID.40
0	26.2943	wild	2.8	0	0.940987	ID.40
2	59.5483	wild	7.93	0	1.68947	ID.3
0	20.8843	wild	3.83	0	0.730062	ID.28
3	20.8871	wild	11.89	0	0.730183	ID.28
0	25.9165	wild	7.95	0	0.927734	ID.13
0	26.3135	wild	1.34	0	0.941654	ID.40
0	27.5729	wild	10.49	0	0.984462	ID.70
0	26.3354	wild	2.96	0	0.942416	ID.79
0	26.3381	wild	3.97	0	0.942511	ID.79
0	26.3409	wild	7.37	0	0.942606	ID.79
0	33.9439	wild	4.75	0	1.1748	ID.12
0	20.4517	wild	1.8	0	0.710897	ID.60
0	42.3929	wild	9.3	0	1.37833	ID.64
0	13.629	wild	7.03	0	0.339264	ID.68
0	13.6318	wild	2.28	0	0.339448	ID.68
2	9.56879	wild	2.67	0	0.0154028	ID.29
8	9.57153	wild	6.39	0	0.0156647	ID.29
1	27.2882	wild	3.7	0	0.974957	ID.22
10	9.57426	wild	6.73	0	0.0159266	ID.29
2	13.6646	wild	1.18	0	0.341652	ID.68
0	9.59069	wild	5.52	0	0.0174963	ID.29
1	9.60164	wild	6.03	0	0.0185413	ID.29
4	9.62081	wild	4.7	0	0.0203671	ID.29
1	30.9952	wild	4.05	0	1.09159	ID.69
47	7.48889	zoo	6.2	1	-0.209011	ID.55
45	5.48889	zoo	5.37	1	-0.493499	ID.2
38	7.48611	zoo	4.83	1	-0.209351	ID.55
47	5.48611	zoo	5.36	1	-0.493963	ID.2
31	7.48333	zoo	5.36	1	-0.209691	ID.55
100	2.83889	zoo	4.63	1	-1.0972	ID.80
8	20.1889	zoo	5.83	1	0.699053	ID.10
20	5.425	zoo	4.23	1	-0.50422	ID.2
60	2.78056	zoo	4.73	1	-1.11621	ID.80
22	49.3861	zoo	6	1	1.51814	ID.16
10	26.3861	zoo	5.04	1	0.944178	ID.24
18	31.5833	zoo	7.64	1	1.1088	ID.54
141	7.24444	zoo	5.86	1	-0.239397	ID.81
15	49.3833	zoo	3.97	1	1.51809	ID.16
0	26.3833	zoo	5.27	1	0.944081	ID.24
19	31.5806	zoo	7.6	1	1.10872	ID.54
88	7.24167	zoo	7.43	1	-0.239749	ID.81
1	49.3806	zoo	2.07	1	1.51803	ID.16
13	26.3806	zoo	4.86	1	0.943985	ID.24
21	31.5778	zoo	7.47	1	1.10864	ID.54
31	7.23889	zoo	7.33	1	-0.2401	ID.81
34	19.0111	zoo	7.03	1	0.644014	ID.72
57	1.10833	zoo	6.47	1	-1.95842	ID.56
51	5.15278	zoo	8.3	1	-0.551359	ID.76
7	19.0083	zoo	6.87	1	0.64388	ID.72
64	1.10556	zoo	6.54	1	-1.96072	ID.56
68	5.15	zoo	7.17	1	-0.551853	ID.76
4	19.0056	zoo	5.83	1	0.643746	ID.72
48	1.10278	zoo	4.77	1	-1.96302	ID.56
68	5.14722	zoo	6.67	1	-0.552347	ID.76
2	27.8583	zoo	5.63	1	0.993892	ID.82
45	10.4444	zoo	5.96	1	0.0955806	ID.46
0	27.8556	zoo	7.17	1	0.993801	ID.82
6	46.8111	zoo	7.37	1	1.46911	ID.32
37	10.4417	zoo	6.87	1	0.095337	ID.46
0	27.8528	zoo	7.46	1	0.99371	ID.82
2	46.8083	zoo	6.5	1	1.46905	ID.32
15	10.4389	zoo	7.5	1	0.0950934	ID.46
44	9.98056	zoo	6.36	1	0.0539812	ID.41
83	2.51944	zoo	5.73	1	-1.20651	ID.80
60	9.97778	zoo	7.5	1	0.0537263	ID.41
76	2.51667	zoo	7.53	1	-1.20752	ID.80
49	9.975	zoo	5.83	1	0.0534713	ID.41
77	2.51389	zoo	6.3	1	-1.20853	ID.80
45	5.26389	zoo	6.37	1	-0.531825	ID.78
46	5.26111	zoo	6.27	1	-0.532308	ID.78
51	5.25833	zoo	4.2	1	-0.532791	ID.78
61	0.772222	zoo	5.2	1	-2.28928	ID.56
69	4.81667	zoo	6.83	1	-0.613123	ID.76
50	0.769444	zoo	4.8	1	-2.29258	ID.56
74	4.81389	zoo	7.07	1	-0.613652	ID.76
52	6.84444	zoo	7.67	1	-0.291404	ID.81
80	6.84167	zoo	7.4	1	-0.291776	ID.81
50	6.83889	zoo	6.84	1	-0.292148	ID.81
56	4.66944	zoo	7.2	1	-0.641547	ID.76
28	0.625	zoo	4.94	1	-2.48296	ID.56
64	4.66667	zoo	6.66	1	-0.642092	ID.76
25	0.622222	zoo	5.2	1	-2.48704	ID.56
22	13.9806	zoo	5.47	1	0.362582	ID.42
27	9.675	zoo	5.9	1	0.0255103	ID.46
49	9.30833	zoo	5.17	1	-0.00986608	ID.41
24	13.9778	zoo	6.4	1	0.3624	ID.42
42	9.67222	zoo	5.87	1	0.0252474	ID.46
26	9.30556	zoo	5.73	1	-0.0101394	ID.41
21	13.975	zoo	6.6	1	0.362218	ID.42
33	9.66944	zoo	5	1	0.0249844	ID.46
49	9.30278	zoo	5.8	1	-0.0104127	ID.41
0	19.1444	zoo	2.91	1	0.650413	ID.10
60	6.38056	zoo	5.67	1	-0.355667	ID.55
66	4.38056	zoo	6.36	1	-0.700025	ID.2
44	1.73611	zoo	6.27	1	-1.54749	ID.80
54	6.37778	zoo	6	1	-0.356065	ID.55
68	4.37778	zoo	6.53	1	-0.700606	ID.2
61	1.73333	zoo	7.44	1	-1.54895	ID.80
0	19.1389	zoo	5.44	1	0.650147	ID.10
49	6.375	zoo	6.5	1	-0.356464	ID.55
62	4.375	zoo	6.43	1	-0.701187	ID.2
97	1.73056	zoo	6.4	1	-1.55042	ID.80
14	17.275	zoo	6.37	1	0.556328	ID.6
48	3.12778	zoo	6.9	1	-1.00846	ID.85
18	13.7944	zoo	5.17	1	0.350311	ID.84
56	8.55556	zoo	7.6	1	-0.0870823	ID.43
33	21.275	zoo	6.6	1	0.747033	ID.38
5	17.2722	zoo	6.04	1	0.556181	ID.6
39	3.125	zoo	5.7	1	-1.00928	ID.85
2	13.7917	zoo	6.43	1	0.350127	ID.84
78	8.55278	zoo	6.24	1	-0.0873797	ID.43
24	21.2722	zoo	6.26	1	0.746913	ID.38
12	17.2694	zoo	4.37	1	0.556033	ID.6
66	3.12222	zoo	4.93	1	-1.01009	ID.85
5	13.7889	zoo	6.6	1	0.349942	ID.84
41	8.55	zoo	7.59	1	-0.0876771	ID.43
14	21.2694	zoo	6.9	1	0.746794	ID.38
33	8.5	zoo	6.83	1	-0.0930475	ID.43
25	21.2194	zoo	8.53	1	0.744639	ID.38
58	8.49722	zoo	7.2	1	-0.0933468	ID.43
0	21.2167	zoo	6.57	1	0.744519	ID.38
67	8.49444	zoo	8.57	1	-0.0936462	ID.43
6	21.2139	zoo	7.1	1	0.744399	ID.38
184	3.98056	zoo	8.56	1	-0.787702	ID.76
27	23.6944	zoo	9.03	1	0.845656	ID.57
153	3.97778	zoo	8.73	1	-0.788342	ID.76
46	23.6917	zoo	8.37	1	0.845549	ID.57
99	3.975	zoo	8.06	1	-0.788981	ID.76
36	23.6889	zoo	8.7	1	0.845441	ID.57
40	29.5694	zoo	7.78	1	1.04847	ID.67
15	30.3	zoo	8.3	1	1.07082	ID.54
280	5.96111	zoo	10.04	1	-0.417929	ID.81
61	29.5667	zoo	7.76	1	1.04839	ID.67
85	30.2972	zoo	8.22	1	1.07074	ID.54
160	5.95833	zoo	10.16	1	-0.418356	ID.81
9	29.5639	zoo	7.68	1	1.0483	ID.67
19	30.2944	zoo	7.93	1	1.07065	ID.54
209	5.95556	zoo	10.03	1	-0.418783	ID.81
9	30.2917	zoo	2.36	1	1.07057	ID.54
74	5.99722	zoo	6.86	1	-0.412399	ID.55
0	3.99722	zoo	6.83	1	-0.783877	ID.2
0	1.35	zoo	6.26	1	-1.77781	ID.80
90	5.99444	zoo	7.33	1	-0.412824	ID.55
121	3.99444	zoo	8.2	1	-0.784513	ID.2
63	5.99167	zoo	6.7	1	-0.413248	ID.55
98	1.34722	zoo	6.3	1	-1.7797	ID.80
107	3.98889	zoo	7.36	1	-0.785788	ID.2
106	1.34444	zoo	6.47	1	-1.78159	ID.80
169	5.85	zoo	10.33	1	-0.435158	ID.81
169	5.84722	zoo	9.74	1	-0.435593	ID.81
220	5.84444	zoo	10.06	1	-0.436028	ID.81
13	30.1806	zoo	1.38	1	1.0672	ID.54
140	3.79444	zoo	7.26	1	-0.831547	ID.76
77	3.79167	zoo	8.2	1	-0.832218	ID.76
69	3.78889	zoo	3.4	1	-0.832889	ID.76
6	23.5028	zoo	4.33	1	0.838219	ID.57
8	23.5	zoo	4.07	1	0.838111	ID.57
60	4.64722	zoo	5.87	1	-0.645915	ID.85
44	4.64444	zoo	6.37	1	-0.646463	ID.85
59	4.64167	zoo	4.2	1	-0.647011	ID.85
45	5.55278	zoo	6.63	1	-0.482903	ID.76
58	1.50833	zoo	7.36	1	-1.67627	ID.56
31	5.55	zoo	5.93	1	-0.483361	ID.76
35	1.50556	zoo	6.96	1	-1.67795	ID.56
27	5.54722	zoo	5.67	1	-0.483819	ID.76
58	1.50278	zoo	6.2	1	-1.67965	ID.56

## Sheet: model 1b
FollowNr	AgeAtThatTime	Duration	Wild_Zoo	log.Duration	z.log.AgeAtThatTime	follow.in.subj	FocalName
2895	59.5483	30	wild	3.4012	3.23309	ID.24.2895	ID.24
2895	59.5483	120	wild	4.78749	3.23309	ID.24.2895	ID.24
658	5.54689	180	wild	5.19296	0.376728	ID.34. 658	ID.34
659	5.54962	10	wild	2.30259	0.377322	ID.34. 659	ID.34
662	5.5551	120	wild	4.78749	0.378509	ID.34. 662	ID.34
662	5.5551	120	wild	4.78749	0.378509	ID.34. 662	ID.34
1036	0.889802	15	wild	2.70805	-1.82551	ID.11.1036	ID.11
664	5.55784	120	wild	4.78749	0.379102	ID.34. 664	ID.34
686	5.62628	120	wild	4.78749	0.393832	ID.34. 686	ID.34
686	5.62628	120	wild	4.78749	0.393832	ID.34. 686	ID.34
686	5.62628	120	wild	4.78749	0.393832	ID.34. 686	ID.34
686	5.62628	120	wild	4.78749	0.393832	ID.34. 686	ID.34
692	8.04928	120	wild	4.78749	0.824814	ID.31. 692	ID.31
692	8.04928	90	wild	4.49981	0.824814	ID.31. 692	ID.31
721	11.9233	45	wild	3.80666	1.29765	ID.18. 721	ID.18
2745	27.1102	60	wild	4.09434	2.28615	ID.21.2745	ID.21
2764	26.7871	60	wild	4.09434	2.27172	ID.42.2764	ID.42
2946	27.2882	20	wild	2.99573	2.29402	ID.42.2946	ID.42
1864	6.65571	40	wild	3.68888	0.596037	ID.41.1864	ID.41
999	2.8501	15	wild	2.70805	-0.424601	ID.41. 999	ID.41
1036	0.889802	15	wild	2.70805	-1.82551	ID.11.1036	ID.11
739	0.525667	60	wild	4.09434	-2.4589	ID.41. 739	ID.41
739	0.525667	90	wild	4.49981	-2.4589	ID.41. 739	ID.41
739	0.525667	120	wild	4.78749	-2.4589	ID.41. 739	ID.41
739	0.525667	120	wild	4.78749	-2.4589	ID.41. 739	ID.41
742	0.528405	120	wild	4.78749	-2.45265	ID.41. 742	ID.41
747	0.533881	211	wild	5.35186	-2.44024	ID.41. 747	ID.41
747	0.533881	120	wild	4.78749	-2.44024	ID.41. 747	ID.41
747	0.533881	120	wild	4.78749	-2.44024	ID.41. 747	ID.41
747	0.533881	60	wild	4.09434	-2.44024	ID.41. 747	ID.41
747	0.533881	480	wild	6.17379	-2.44024	ID.41. 747	ID.41
747	0.533881	480	wild	6.17379	-2.44024	ID.41. 747	ID.41
747	0.533881	120	wild	4.78749	-2.44024	ID.41. 747	ID.41
747	0.533881	360	wild	5.8861	-2.44024	ID.41. 747	ID.41
747	0.533881	120	wild	4.78749	-2.44024	ID.41. 747	ID.41
747	0.533881	360	wild	5.8861	-2.44024	ID.41. 747	ID.41
747	0.533881	300	wild	5.70378	-2.44024	ID.41. 747	ID.41
747	0.533881	120	wild	4.78749	-2.44024	ID.41. 747	ID.41
747	0.533881	120	wild	4.78749	-2.44024	ID.41. 747	ID.41
747	0.533881	120	wild	4.78749	-2.44024	ID.41. 747	ID.41
750	0.539357	120	wild	4.78749	-2.42796	ID.41. 750	ID.41
750	0.539357	30	wild	3.4012	-2.42796	ID.41. 750	ID.41
750	0.539357	30	wild	3.4012	-2.42796	ID.41. 750	ID.41
750	0.539357	120	wild	4.78749	-2.42796	ID.41. 750	ID.41
750	0.539357	15	wild	2.70805	-2.42796	ID.41. 750	ID.41
750	0.539357	15	wild	2.70805	-2.42796	ID.41. 750	ID.41
750	0.539357	120	wild	4.78749	-2.42796	ID.41. 750	ID.41
750	0.539357	120	wild	4.78749	-2.42796	ID.41. 750	ID.41
750	0.539357	120	wild	4.78749	-2.42796	ID.41. 750	ID.41
750	0.539357	120	wild	4.78749	-2.42796	ID.41. 750	ID.41
750	0.539357	120	wild	4.78749	-2.42796	ID.41. 750	ID.41
1038	0.892539	60	wild	4.09434	-1.82181	ID.11.1038	ID.11
750	0.539357	120	wild	4.78749	-2.42796	ID.41. 750	ID.41
752	0.542094	120	wild	4.78749	-2.42187	ID.41. 752	ID.41
752	0.542094	120	wild	4.78749	-2.42187	ID.41. 752	ID.41
752	0.542094	121	wild	4.79579	-2.42187	ID.41. 752	ID.41
755	0.544832	120	wild	4.78749	-2.41581	ID.41. 755	ID.41
755	0.544832	180	wild	5.19296	-2.41581	ID.41. 755	ID.41
755	0.544832	180	wild	5.19296	-2.41581	ID.41. 755	ID.41
755	0.544832	120	wild	4.78749	-2.41581	ID.41. 755	ID.41
755	0.544832	120	wild	4.78749	-2.41581	ID.41. 755	ID.41
755	0.544832	120	wild	4.78749	-2.41581	ID.41. 755	ID.41
755	0.544832	120	wild	4.78749	-2.41581	ID.41. 755	ID.41
758	9.97125	45	wild	3.80666	1.08249	ID.39. 758	ID.39
758	9.97125	15	wild	2.70805	1.08249	ID.39. 758	ID.39
758	9.97125	150	wild	5.01064	1.08249	ID.39. 758	ID.39
758	9.97125	10	wild	2.30259	1.08249	ID.39. 758	ID.39
760	9.97399	92	wild	4.52179	1.08282	ID.39. 760	ID.39
766	5.73032	30	wild	3.4012	0.415882	ID.34. 766	ID.34
768	5.73306	360	wild	5.8861	0.416456	ID.34. 768	ID.34
768	5.73306	180	wild	5.19296	0.416456	ID.34. 768	ID.34
768	5.73306	180	wild	5.19296	0.416456	ID.34. 768	ID.34
768	5.73306	20	wild	2.99573	0.416456	ID.34. 768	ID.34
1038	0.892539	15	wild	2.70805	-1.82181	ID.11.1038	ID.11
793	10.0561	30	wild	3.4012	1.09269	ID.39. 793	ID.39
793	10.0561	10	wild	2.30259	1.09269	ID.39. 793	ID.39
793	10.0561	90	wild	4.49981	1.09269	ID.39. 793	ID.39
1038	0.892539	15	wild	2.70805	-1.82181	ID.11.1038	ID.11
797	10.0616	120	wild	4.78749	1.09335	ID.39. 797	ID.39
803	8.22998	180	wild	5.19296	0.851531	ID.31. 803	ID.31
826	0.536619	120	wild	4.78749	-2.43408	ID.41. 826	ID.41
826	0.536619	120	wild	4.78749	-2.43408	ID.41. 826	ID.41
991	2.83915	20	wild	2.99573	-0.429234	ID.41. 991	ID.41
991	2.83915	10	wild	2.30259	-0.429234	ID.41. 991	ID.41
991	2.83915	5	wild	1.60944	-0.429234	ID.41. 991	ID.41
991	2.83915	30	wild	3.4012	-0.429234	ID.41. 991	ID.41
991	2.83915	20	wild	2.99573	-0.429234	ID.41. 991	ID.41
991	2.83915	10	wild	2.30259	-0.429234	ID.41. 991	ID.41
991	2.83915	10	wild	2.30259	-0.429234	ID.41. 991	ID.41
991	2.83915	190	wild	5.24702	-0.429234	ID.41. 991	ID.41
991	2.83915	10	wild	2.30259	-0.429234	ID.41. 991	ID.41
991	2.83915	20	wild	2.99573	-0.429234	ID.41. 991	ID.41
991	2.83915	15	wild	2.70805	-0.429234	ID.41. 991	ID.41
991	2.83915	30	wild	3.4012	-0.429234	ID.41. 991	ID.41
991	2.83915	120	wild	4.78749	-0.429234	ID.41. 991	ID.41
991	2.83915	10	wild	2.30259	-0.429234	ID.41. 991	ID.41
991	2.83915	20	wild	2.99573	-0.429234	ID.41. 991	ID.41
991	2.83915	60	wild	4.09434	-0.429234	ID.41. 991	ID.41
991	2.83915	5	wild	1.60944	-0.429234	ID.41. 991	ID.41
991	2.83915	20	wild	2.99573	-0.429234	ID.41. 991	ID.41
991	2.83915	20	wild	2.99573	-0.429234	ID.41. 991	ID.41
991	2.83915	15	wild	2.70805	-0.429234	ID.41. 991	ID.41
991	2.83915	360	wild	5.8861	-0.429234	ID.41. 991	ID.41
991	2.83915	15	wild	2.70805	-0.429234	ID.41. 991	ID.41
991	2.83915	10	wild	2.30259	-0.429234	ID.41. 991	ID.41
991	2.83915	10	wild	2.30259	-0.429234	ID.41. 991	ID.41
991	2.83915	10	wild	2.30259	-0.429234	ID.41. 991	ID.41
991	2.83915	30	wild	3.4012	-0.429234	ID.41. 991	ID.41
993	2.84189	20	wild	2.99573	-0.428074	ID.41. 993	ID.41
993	2.84189	30	wild	3.4012	-0.428074	ID.41. 993	ID.41
993	2.84189	20	wild	2.99573	-0.428074	ID.41. 993	ID.41
993	2.84189	15	wild	2.70805	-0.428074	ID.41. 993	ID.41
993	2.84189	5	wild	1.60944	-0.428074	ID.41. 993	ID.41
993	2.84189	5	wild	1.60944	-0.428074	ID.41. 993	ID.41
993	2.84189	30	wild	3.4012	-0.428074	ID.41. 993	ID.41
993	2.84189	20	wild	2.99573	-0.428074	ID.41. 993	ID.41
993	2.84189	30	wild	3.4012	-0.428074	ID.41. 993	ID.41
993	2.84189	15	wild	2.70805	-0.428074	ID.41. 993	ID.41
993	2.84189	10	wild	2.30259	-0.428074	ID.41. 993	ID.41
993	2.84189	20	wild	2.99573	-0.428074	ID.41. 993	ID.41
993	2.84189	20	wild	2.99573	-0.428074	ID.41. 993	ID.41
993	2.84189	15	wild	2.70805	-0.428074	ID.41. 993	ID.41
993	2.84189	15	wild	2.70805	-0.428074	ID.41. 993	ID.41
993	2.84189	40	wild	3.68888	-0.428074	ID.41. 993	ID.41
993	2.84189	20	wild	2.99573	-0.428074	ID.41. 993	ID.41
993	2.84189	30	wild	3.4012	-0.428074	ID.41. 993	ID.41
993	2.84189	15	wild	2.70805	-0.428074	ID.41. 993	ID.41
993	2.84189	10	wild	2.30259	-0.428074	ID.41. 993	ID.41
993	2.84189	5	wild	1.60944	-0.428074	ID.41. 993	ID.41
993	2.84189	30	wild	3.4012	-0.428074	ID.41. 993	ID.41
993	2.84189	20	wild	2.99573	-0.428074	ID.41. 993	ID.41
993	2.84189	30	wild	3.4012	-0.428074	ID.41. 993	ID.41
993	2.84189	20	wild	2.99573	-0.428074	ID.41. 993	ID.41
993	2.84189	30	wild	3.4012	-0.428074	ID.41. 993	ID.41
993	2.84189	5	wild	1.60944	-0.428074	ID.41. 993	ID.41
993	2.84189	20	wild	2.99573	-0.428074	ID.41. 993	ID.41
993	2.84189	30	wild	3.4012	-0.428074	ID.41. 993	ID.41
993	2.84189	15	wild	2.70805	-0.428074	ID.41. 993	ID.41
993	2.84189	30	wild	3.4012	-0.428074	ID.41. 993	ID.41
993	2.84189	90	wild	4.49981	-0.428074	ID.41. 993	ID.41
993	2.84189	10	wild	2.30259	-0.428074	ID.41. 993	ID.41
993	2.84189	20	wild	2.99573	-0.428074	ID.41. 993	ID.41
993	2.84189	60	wild	4.09434	-0.428074	ID.41. 993	ID.41
993	2.84189	30	wild	3.4012	-0.428074	ID.41. 993	ID.41
993	2.84189	120	wild	4.78749	-0.428074	ID.41. 993	ID.41
993	2.84189	30	wild	3.4012	-0.428074	ID.41. 993	ID.41
993	2.84189	120	wild	4.78749	-0.428074	ID.41. 993	ID.41
993	2.84189	60	wild	4.09434	-0.428074	ID.41. 993	ID.41
993	2.84189	30	wild	3.4012	-0.428074	ID.41. 993	ID.41
993	2.84189	30	wild	3.4012	-0.428074	ID.41. 993	ID.41
993	2.84189	15	wild	2.70805	-0.428074	ID.41. 993	ID.41
993	2.84189	60	wild	4.09434	-0.428074	ID.41. 993	ID.41
993	2.84189	10	wild	2.30259	-0.428074	ID.41. 993	ID.41
993	2.84189	20	wild	2.99573	-0.428074	ID.41. 993	ID.41
993	2.84189	10	wild	2.30259	-0.428074	ID.41. 993	ID.41
993	2.84189	300	wild	5.70378	-0.428074	ID.41. 993	ID.41
993	2.84189	60	wild	4.09434	-0.428074	ID.41. 993	ID.41
993	2.84189	10	wild	2.30259	-0.428074	ID.41. 993	ID.41
993	2.84189	30	wild	3.4012	-0.428074	ID.41. 993	ID.41
993	2.84189	60	wild	4.09434	-0.428074	ID.41. 993	ID.41
993	2.84189	10	wild	2.30259	-0.428074	ID.41. 993	ID.41
993	2.84189	30	wild	3.4012	-0.428074	ID.41. 993	ID.41
993	2.84189	10	wild	2.30259	-0.428074	ID.41. 993	ID.41
993	2.84189	20	wild	2.99573	-0.428074	ID.41. 993	ID.41
993	2.84189	10	wild	2.30259	-0.428074	ID.41. 993	ID.41
993	2.84189	300	wild	5.70378	-0.428074	ID.41. 993	ID.41
993	2.84189	30	wild	3.4012	-0.428074	ID.41. 993	ID.41
993	2.84189	5	wild	1.60944	-0.428074	ID.41. 993	ID.41
995	2.84463	30	wild	3.4012	-0.426916	ID.41. 995	ID.41
995	2.84463	15	wild	2.70805	-0.426916	ID.41. 995	ID.41
995	2.84463	20	wild	2.99573	-0.426916	ID.41. 995	ID.41
995	2.84463	120	wild	4.78749	-0.426916	ID.41. 995	ID.41
995	2.84463	50	wild	3.91202	-0.426916	ID.41. 995	ID.41
995	2.84463	10	wild	2.30259	-0.426916	ID.41. 995	ID.41
995	2.84463	30	wild	3.4012	-0.426916	ID.41. 995	ID.41
995	2.84463	20	wild	2.99573	-0.426916	ID.41. 995	ID.41
995	2.84463	60	wild	4.09434	-0.426916	ID.41. 995	ID.41
995	2.84463	10	wild	2.30259	-0.426916	ID.41. 995	ID.41
995	2.84463	120	wild	4.78749	-0.426916	ID.41. 995	ID.41
995	2.84463	120	wild	4.78749	-0.426916	ID.41. 995	ID.41
995	2.84463	15	wild	2.70805	-0.426916	ID.41. 995	ID.41
995	2.84463	20	wild	2.99573	-0.426916	ID.41. 995	ID.41
995	2.84463	10	wild	2.30259	-0.426916	ID.41. 995	ID.41
995	2.84463	10	wild	2.30259	-0.426916	ID.41. 995	ID.41
995	2.84463	20	wild	2.99573	-0.426916	ID.41. 995	ID.41
995	2.84463	60	wild	4.09434	-0.426916	ID.41. 995	ID.41
995	2.84463	60	wild	4.09434	-0.426916	ID.41. 995	ID.41
995	2.84463	60	wild	4.09434	-0.426916	ID.41. 995	ID.41
995	2.84463	15	wild	2.70805	-0.426916	ID.41. 995	ID.41
995	2.84463	30	wild	3.4012	-0.426916	ID.41. 995	ID.41
995	2.84463	30	wild	3.4012	-0.426916	ID.41. 995	ID.41
995	2.84463	20	wild	2.99573	-0.426916	ID.41. 995	ID.41
995	2.84463	420	wild	6.04025	-0.426916	ID.41. 995	ID.41
995	2.84463	360	wild	5.8861	-0.426916	ID.41. 995	ID.41
995	2.84463	60	wild	4.09434	-0.426916	ID.41. 995	ID.41
995	2.84463	5	wild	1.60944	-0.426916	ID.41. 995	ID.41
995	2.84463	360	wild	5.8861	-0.426916	ID.41. 995	ID.41
995	2.84463	20	wild	2.99573	-0.426916	ID.41. 995	ID.41
995	2.84463	10	wild	2.30259	-0.426916	ID.41. 995	ID.41
995	2.84463	30	wild	3.4012	-0.426916	ID.41. 995	ID.41
995	2.84463	15	wild	2.70805	-0.426916	ID.41. 995	ID.41
995	2.84463	5	wild	1.60944	-0.426916	ID.41. 995	ID.41
995	2.84463	10	wild	2.30259	-0.426916	ID.41. 995	ID.41
995	2.84463	7	wild	1.94591	-0.426916	ID.41. 995	ID.41
995	2.84463	15	wild	2.70805	-0.426916	ID.41. 995	ID.41
995	2.84463	120	wild	4.78749	-0.426916	ID.41. 995	ID.41
995	2.84463	15	wild	2.70805	-0.426916	ID.41. 995	ID.41
995	2.84463	20	wild	2.99573	-0.426916	ID.41. 995	ID.41
995	2.84463	5	wild	1.60944	-0.426916	ID.41. 995	ID.41
995	2.84463	60	wild	4.09434	-0.426916	ID.41. 995	ID.41
995	2.84463	20	wild	2.99573	-0.426916	ID.41. 995	ID.41
995	2.84463	120	wild	4.78749	-0.426916	ID.41. 995	ID.41
995	2.84463	20	wild	2.99573	-0.426916	ID.41. 995	ID.41
995	2.84463	15	wild	2.70805	-0.426916	ID.41. 995	ID.41
995	2.84463	20	wild	2.99573	-0.426916	ID.41. 995	ID.41
995	2.84463	60	wild	4.09434	-0.426916	ID.41. 995	ID.41
995	2.84463	60	wild	4.09434	-0.426916	ID.41. 995	ID.41
995	2.84463	30	wild	3.4012	-0.426916	ID.41. 995	ID.41
995	2.84463	15	wild	2.70805	-0.426916	ID.41. 995	ID.41
995	2.84463	60	wild	4.09434	-0.426916	ID.41. 995	ID.41
995	2.84463	30	wild	3.4012	-0.426916	ID.41. 995	ID.41
995	2.84463	15	wild	2.70805	-0.426916	ID.41. 995	ID.41
995	2.84463	25	wild	3.21888	-0.426916	ID.41. 995	ID.41
995	2.84463	25	wild	3.21888	-0.426916	ID.41. 995	ID.41
995	2.84463	120	wild	4.78749	-0.426916	ID.41. 995	ID.41
995	2.84463	20	wild	2.99573	-0.426916	ID.41. 995	ID.41
995	2.84463	5	wild	1.60944	-0.426916	ID.41. 995	ID.41
995	2.84463	60	wild	4.09434	-0.426916	ID.41. 995	ID.41
995	2.84463	20	wild	2.99573	-0.426916	ID.41. 995	ID.41
995	2.84463	10	wild	2.30259	-0.426916	ID.41. 995	ID.41
995	2.84463	15	wild	2.70805	-0.426916	ID.41. 995	ID.41
995	2.84463	5	wild	1.60944	-0.426916	ID.41. 995	ID.41
995	2.84463	15	wild	2.70805	-0.426916	ID.41. 995	ID.41
995	2.84463	20	wild	2.99573	-0.426916	ID.41. 995	ID.41
995	2.84463	5	wild	1.60944	-0.426916	ID.41. 995	ID.41
995	2.84463	330	wild	5.79909	-0.426916	ID.41. 995	ID.41
995	2.84463	120	wild	4.78749	-0.426916	ID.41. 995	ID.41
995	2.84463	60	wild	4.09434	-0.426916	ID.41. 995	ID.41
995	2.84463	10	wild	2.30259	-0.426916	ID.41. 995	ID.41
995	2.84463	30	wild	3.4012	-0.426916	ID.41. 995	ID.41
995	2.84463	10	wild	2.30259	-0.426916	ID.41. 995	ID.41
995	2.84463	60	wild	4.09434	-0.426916	ID.41. 995	ID.41
995	2.84463	20	wild	2.99573	-0.426916	ID.41. 995	ID.41
995	2.84463	30	wild	3.4012	-0.426916	ID.41. 995	ID.41
995	2.84463	60	wild	4.09434	-0.426916	ID.41. 995	ID.41
995	2.84463	90	wild	4.49981	-0.426916	ID.41. 995	ID.41
995	2.84463	60	wild	4.09434	-0.426916	ID.41. 995	ID.41
995	2.84463	120	wild	4.78749	-0.426916	ID.41. 995	ID.41
995	2.84463	30	wild	3.4012	-0.426916	ID.41. 995	ID.41
995	2.84463	20	wild	2.99573	-0.426916	ID.41. 995	ID.41
995	2.84463	20	wild	2.99573	-0.426916	ID.41. 995	ID.41
999	2.8501	15	wild	2.70805	-0.424601	ID.41. 999	ID.41
999	2.8501	10	wild	2.30259	-0.424601	ID.41. 999	ID.41
999	2.8501	15	wild	2.70805	-0.424601	ID.41. 999	ID.41
999	2.8501	10	wild	2.30259	-0.424601	ID.41. 999	ID.41
999	2.8501	10	wild	2.30259	-0.424601	ID.41. 999	ID.41
1044	2.91307	20	wild	2.99573	-0.398302	ID.41.1044	ID.41
999	2.8501	20	wild	2.99573	-0.424601	ID.41. 999	ID.41
999	2.8501	10	wild	2.30259	-0.424601	ID.41. 999	ID.41
999	2.8501	25	wild	3.21888	-0.424601	ID.41. 999	ID.41
999	2.8501	15	wild	2.70805	-0.424601	ID.41. 999	ID.41
999	2.8501	20	wild	2.99573	-0.424601	ID.41. 999	ID.41
999	2.8501	20	wild	2.99573	-0.424601	ID.41. 999	ID.41
999	2.8501	15	wild	2.70805	-0.424601	ID.41. 999	ID.41
999	2.8501	20	wild	2.99573	-0.424601	ID.41. 999	ID.41
1001	2.85284	30	wild	3.4012	-0.423446	ID.41.1001	ID.41
1001	2.85284	15	wild	2.70805	-0.423446	ID.41.1001	ID.41
1001	2.85284	20	wild	2.99573	-0.423446	ID.41.1001	ID.41
1001	2.85284	15	wild	2.70805	-0.423446	ID.41.1001	ID.41
1001	2.85284	20	wild	2.99573	-0.423446	ID.41.1001	ID.41
1001	2.85284	15	wild	2.70805	-0.423446	ID.41.1001	ID.41
1001	2.85284	20	wild	2.99573	-0.423446	ID.41.1001	ID.41
1001	2.85284	20	wild	2.99573	-0.423446	ID.41.1001	ID.41
1001	2.85284	15	wild	2.70805	-0.423446	ID.41.1001	ID.41
1001	2.85284	10	wild	2.30259	-0.423446	ID.41.1001	ID.41
1001	2.85284	10	wild	2.30259	-0.423446	ID.41.1001	ID.41
1001	2.85284	20	wild	2.99573	-0.423446	ID.41.1001	ID.41
1001	2.85284	40	wild	3.68888	-0.423446	ID.41.1001	ID.41
1001	2.85284	30	wild	3.4012	-0.423446	ID.41.1001	ID.41
1001	2.85284	15	wild	2.70805	-0.423446	ID.41.1001	ID.41
1001	2.85284	60	wild	4.09434	-0.423446	ID.41.1001	ID.41
1001	2.85284	20	wild	2.99573	-0.423446	ID.41.1001	ID.41
1001	2.85284	30	wild	3.4012	-0.423446	ID.41.1001	ID.41
1001	2.85284	20	wild	2.99573	-0.423446	ID.41.1001	ID.41
1001	2.85284	20	wild	2.99573	-0.423446	ID.41.1001	ID.41
1001	2.85284	10	wild	2.30259	-0.423446	ID.41.1001	ID.41
1001	2.85284	60	wild	4.09434	-0.423446	ID.41.1001	ID.41
1001	2.85284	10	wild	2.30259	-0.423446	ID.41.1001	ID.41
1001	2.85284	20	wild	2.99573	-0.423446	ID.41.1001	ID.41
1001	2.85284	60	wild	4.09434	-0.423446	ID.41.1001	ID.41
1001	2.85284	10	wild	2.30259	-0.423446	ID.41.1001	ID.41
1001	2.85284	30	wild	3.4012	-0.423446	ID.41.1001	ID.41
1001	2.85284	15	wild	2.70805	-0.423446	ID.41.1001	ID.41
1001	2.85284	30	wild	3.4012	-0.423446	ID.41.1001	ID.41
1001	2.85284	15	wild	2.70805	-0.423446	ID.41.1001	ID.41
1001	2.85284	20	wild	2.99573	-0.423446	ID.41.1001	ID.41
1001	2.85284	30	wild	3.4012	-0.423446	ID.41.1001	ID.41
1001	2.85284	15	wild	2.70805	-0.423446	ID.41.1001	ID.41
1001	2.85284	15	wild	2.70805	-0.423446	ID.41.1001	ID.41
1001	2.85284	40	wild	3.68888	-0.423446	ID.41.1001	ID.41
1001	2.85284	30	wild	3.4012	-0.423446	ID.41.1001	ID.41
1001	2.85284	15	wild	2.70805	-0.423446	ID.41.1001	ID.41
1001	2.85284	15	wild	2.70805	-0.423446	ID.41.1001	ID.41
1001	2.85284	20	wild	2.99573	-0.423446	ID.41.1001	ID.41
1001	2.85284	15	wild	2.70805	-0.423446	ID.41.1001	ID.41
1001	2.85284	120	wild	4.78749	-0.423446	ID.41.1001	ID.41
1001	2.85284	10	wild	2.30259	-0.423446	ID.41.1001	ID.41
1001	2.85284	20	wild	2.99573	-0.423446	ID.41.1001	ID.41
1001	2.85284	90	wild	4.49981	-0.423446	ID.41.1001	ID.41
1001	2.85284	180	wild	5.19296	-0.423446	ID.41.1001	ID.41
1001	2.85284	10	wild	2.30259	-0.423446	ID.41.1001	ID.41
1001	2.85284	15	wild	2.70805	-0.423446	ID.41.1001	ID.41
1001	2.85284	300	wild	5.70378	-0.423446	ID.41.1001	ID.41
1001	2.85284	10	wild	2.30259	-0.423446	ID.41.1001	ID.41
1001	2.85284	15	wild	2.70805	-0.423446	ID.41.1001	ID.41
1001	2.85284	20	wild	2.99573	-0.423446	ID.41.1001	ID.41
1001	2.85284	15	wild	2.70805	-0.423446	ID.41.1001	ID.41
1001	2.85284	10	wild	2.30259	-0.423446	ID.41.1001	ID.41
1001	2.85284	20	wild	2.99573	-0.423446	ID.41.1001	ID.41
1001	2.85284	30	wild	3.4012	-0.423446	ID.41.1001	ID.41
1001	2.85284	30	wild	3.4012	-0.423446	ID.41.1001	ID.41
1001	2.85284	20	wild	2.99573	-0.423446	ID.41.1001	ID.41
1001	2.85284	10	wild	2.30259	-0.423446	ID.41.1001	ID.41
1001	2.85284	45	wild	3.80666	-0.423446	ID.41.1001	ID.41
1001	2.85284	60	wild	4.09434	-0.423446	ID.41.1001	ID.41
1001	2.85284	20	wild	2.99573	-0.423446	ID.41.1001	ID.41
1001	2.85284	10	wild	2.30259	-0.423446	ID.41.1001	ID.41
1001	2.85284	5	wild	1.60944	-0.423446	ID.41.1001	ID.41
1001	2.85284	30	wild	3.4012	-0.423446	ID.41.1001	ID.41
1001	2.85284	15	wild	2.70805	-0.423446	ID.41.1001	ID.41
1001	2.85284	30	wild	3.4012	-0.423446	ID.41.1001	ID.41
1001	2.85284	15	wild	2.70805	-0.423446	ID.41.1001	ID.41
1001	2.85284	120	wild	4.78749	-0.423446	ID.41.1001	ID.41
1001	2.85284	15	wild	2.70805	-0.423446	ID.41.1001	ID.41
1001	2.85284	15	wild	2.70805	-0.423446	ID.41.1001	ID.41
1001	2.85284	20	wild	2.99573	-0.423446	ID.41.1001	ID.41
1001	2.85284	10	wild	2.30259	-0.423446	ID.41.1001	ID.41
1001	2.85284	15	wild	2.70805	-0.423446	ID.41.1001	ID.41
1001	2.85284	15	wild	2.70805	-0.423446	ID.41.1001	ID.41
1001	2.85284	20	wild	2.99573	-0.423446	ID.41.1001	ID.41
1001	2.85284	15	wild	2.70805	-0.423446	ID.41.1001	ID.41
1014	0.865161	15	wild	2.70805	-1.8593	ID.11.1014	ID.11
1014	0.865161	20	wild	2.99573	-1.8593	ID.11.1014	ID.11
1014	0.865161	10	wild	2.30259	-1.8593	ID.11.1014	ID.11
1014	0.865161	25	wild	3.21888	-1.8593	ID.11.1014	ID.11
1014	0.865161	12	wild	2.48491	-1.8593	ID.11.1014	ID.11
1014	0.865161	20	wild	2.99573	-1.8593	ID.11.1014	ID.11
1014	0.865161	15	wild	2.70805	-1.8593	ID.11.1014	ID.11
1014	0.865161	10	wild	2.30259	-1.8593	ID.11.1014	ID.11
1014	0.865161	20	wild	2.99573	-1.8593	ID.11.1014	ID.11
1014	0.865161	60	wild	4.09434	-1.8593	ID.11.1014	ID.11
1014	0.865161	30	wild	3.4012	-1.8593	ID.11.1014	ID.11
1014	0.865161	20	wild	2.99573	-1.8593	ID.11.1014	ID.11
1014	0.865161	20	wild	2.99573	-1.8593	ID.11.1014	ID.11
1014	0.865161	60	wild	4.09434	-1.8593	ID.11.1014	ID.11
1014	0.865161	240	wild	5.48064	-1.8593	ID.11.1014	ID.11
1014	0.865161	60	wild	4.09434	-1.8593	ID.11.1014	ID.11
1014	0.865161	15	wild	2.70805	-1.8593	ID.11.1014	ID.11
1014	0.865161	30	wild	3.4012	-1.8593	ID.11.1014	ID.11
1014	0.865161	60	wild	4.09434	-1.8593	ID.11.1014	ID.11
1014	0.865161	20	wild	2.99573	-1.8593	ID.11.1014	ID.11
1014	0.865161	20	wild	2.99573	-1.8593	ID.11.1014	ID.11
1014	0.865161	20	wild	2.99573	-1.8593	ID.11.1014	ID.11
1014	0.865161	240	wild	5.48064	-1.8593	ID.11.1014	ID.11
1014	0.865161	120	wild	4.78749	-1.8593	ID.11.1014	ID.11
1014	0.865161	60	wild	4.09434	-1.8593	ID.11.1014	ID.11
1014	0.865161	30	wild	3.4012	-1.8593	ID.11.1014	ID.11
1014	0.865161	60	wild	4.09434	-1.8593	ID.11.1014	ID.11
1014	0.865161	30	wild	3.4012	-1.8593	ID.11.1014	ID.11
1014	0.865161	10	wild	2.30259	-1.8593	ID.11.1014	ID.11
1014	0.865161	20	wild	2.99573	-1.8593	ID.11.1014	ID.11
1014	0.865161	30	wild	3.4012	-1.8593	ID.11.1014	ID.11
1014	0.865161	60	wild	4.09434	-1.8593	ID.11.1014	ID.11
1014	0.865161	60	wild	4.09434	-1.8593	ID.11.1014	ID.11
1014	0.865161	30	wild	3.4012	-1.8593	ID.11.1014	ID.11
1014	0.865161	20	wild	2.99573	-1.8593	ID.11.1014	ID.11
1014	0.865161	7	wild	1.94591	-1.8593	ID.11.1014	ID.11
1014	0.865161	20	wild	2.99573	-1.8593	ID.11.1014	ID.11
1014	0.865161	60	wild	4.09434	-1.8593	ID.11.1014	ID.11
1014	0.865161	60	wild	4.09434	-1.8593	ID.11.1014	ID.11
1014	0.865161	20	wild	2.99573	-1.8593	ID.11.1014	ID.11
1014	0.865161	240	wild	5.48064	-1.8593	ID.11.1014	ID.11
1014	0.865161	30	wild	3.4012	-1.8593	ID.11.1014	ID.11
1018	0.867899	10	wild	2.30259	-1.8555	ID.11.1018	ID.11
1018	0.867899	20	wild	2.99573	-1.8555	ID.11.1018	ID.11
1018	0.867899	15	wild	2.70805	-1.8555	ID.11.1018	ID.11
1018	0.867899	15	wild	2.70805	-1.8555	ID.11.1018	ID.11
1018	0.867899	15	wild	2.70805	-1.8555	ID.11.1018	ID.11
1018	0.867899	20	wild	2.99573	-1.8555	ID.11.1018	ID.11
1018	0.867899	20	wild	2.99573	-1.8555	ID.11.1018	ID.11
1018	0.867899	15	wild	2.70805	-1.8555	ID.11.1018	ID.11
1018	0.867899	15	wild	2.70805	-1.8555	ID.11.1018	ID.11
1018	0.867899	40	wild	3.68888	-1.8555	ID.11.1018	ID.11
1018	0.867899	20	wild	2.99573	-1.8555	ID.11.1018	ID.11
1018	0.867899	90	wild	4.49981	-1.8555	ID.11.1018	ID.11
1018	0.867899	20	wild	2.99573	-1.8555	ID.11.1018	ID.11
1018	0.867899	20	wild	2.99573	-1.8555	ID.11.1018	ID.11
1018	0.867899	10	wild	2.30259	-1.8555	ID.11.1018	ID.11
1018	0.867899	60	wild	4.09434	-1.8555	ID.11.1018	ID.11
1018	0.867899	10	wild	2.30259	-1.8555	ID.11.1018	ID.11
1018	0.867899	25	wild	3.21888	-1.8555	ID.11.1018	ID.11
1018	0.867899	20	wild	2.99573	-1.8555	ID.11.1018	ID.11
1018	0.867899	30	wild	3.4012	-1.8555	ID.11.1018	ID.11
1018	0.867899	15	wild	2.70805	-1.8555	ID.11.1018	ID.11
1018	0.867899	180	wild	5.19296	-1.8555	ID.11.1018	ID.11
1018	0.867899	30	wild	3.4012	-1.8555	ID.11.1018	ID.11
1018	0.867899	120	wild	4.78749	-1.8555	ID.11.1018	ID.11
1018	0.867899	10	wild	2.30259	-1.8555	ID.11.1018	ID.11
1018	0.867899	15	wild	2.70805	-1.8555	ID.11.1018	ID.11
1018	0.867899	10	wild	2.30259	-1.8555	ID.11.1018	ID.11
1018	0.867899	30	wild	3.4012	-1.8555	ID.11.1018	ID.11
1018	0.867899	30	wild	3.4012	-1.8555	ID.11.1018	ID.11
1018	0.867899	10	wild	2.30259	-1.8555	ID.11.1018	ID.11
1018	0.867899	60	wild	4.09434	-1.8555	ID.11.1018	ID.11
1018	0.867899	60	wild	4.09434	-1.8555	ID.11.1018	ID.11
1018	0.867899	20	wild	2.99573	-1.8555	ID.11.1018	ID.11
1018	0.867899	10	wild	2.30259	-1.8555	ID.11.1018	ID.11
1018	0.867899	15	wild	2.70805	-1.8555	ID.11.1018	ID.11
1018	0.867899	20	wild	2.99573	-1.8555	ID.11.1018	ID.11
1018	0.867899	300	wild	5.70378	-1.8555	ID.11.1018	ID.11
1018	0.867899	30	wild	3.4012	-1.8555	ID.11.1018	ID.11
1024	0.876112	30	wild	3.4012	-1.84417	ID.11.1024	ID.11
1024	0.876112	120	wild	4.78749	-1.84417	ID.11.1024	ID.11
1024	0.876112	180	wild	5.19296	-1.84417	ID.11.1024	ID.11
1024	0.876112	10	wild	2.30259	-1.84417	ID.11.1024	ID.11
1024	0.876112	15	wild	2.70805	-1.84417	ID.11.1024	ID.11
1024	0.876112	20	wild	2.99573	-1.84417	ID.11.1024	ID.11
1024	0.876112	30	wild	3.4012	-1.84417	ID.11.1024	ID.11
1024	0.876112	10	wild	2.30259	-1.84417	ID.11.1024	ID.11
1024	0.876112	20	wild	2.99573	-1.84417	ID.11.1024	ID.11
1024	0.876112	15	wild	2.70805	-1.84417	ID.11.1024	ID.11
1024	0.876112	120	wild	4.78749	-1.84417	ID.11.1024	ID.11
1024	0.876112	10	wild	2.30259	-1.84417	ID.11.1024	ID.11
1024	0.876112	30	wild	3.4012	-1.84417	ID.11.1024	ID.11
1024	0.876112	15	wild	2.70805	-1.84417	ID.11.1024	ID.11
1024	0.876112	20	wild	2.99573	-1.84417	ID.11.1024	ID.11
1024	0.876112	30	wild	3.4012	-1.84417	ID.11.1024	ID.11
1024	0.876112	60	wild	4.09434	-1.84417	ID.11.1024	ID.11
1024	0.876112	30	wild	3.4012	-1.84417	ID.11.1024	ID.11
1024	0.876112	15	wild	2.70805	-1.84417	ID.11.1024	ID.11
1024	0.876112	20	wild	2.99573	-1.84417	ID.11.1024	ID.11
1024	0.876112	60	wild	4.09434	-1.84417	ID.11.1024	ID.11
1024	0.876112	60	wild	4.09434	-1.84417	ID.11.1024	ID.11
1024	0.876112	60	wild	4.09434	-1.84417	ID.11.1024	ID.11
1024	0.876112	20	wild	2.99573	-1.84417	ID.11.1024	ID.11
1024	0.876112	20	wild	2.99573	-1.84417	ID.11.1024	ID.11
1024	0.876112	20	wild	2.99573	-1.84417	ID.11.1024	ID.11
1024	0.876112	20	wild	2.99573	-1.84417	ID.11.1024	ID.11
1024	0.876112	120	wild	4.78749	-1.84417	ID.11.1024	ID.11
1024	0.876112	20	wild	2.99573	-1.84417	ID.11.1024	ID.11
1024	0.876112	30	wild	3.4012	-1.84417	ID.11.1024	ID.11
1024	0.876112	60	wild	4.09434	-1.84417	ID.11.1024	ID.11
1024	0.876112	10	wild	2.30259	-1.84417	ID.11.1024	ID.11
1024	0.876112	360	wild	5.8861	-1.84417	ID.11.1024	ID.11
1024	0.876112	15	wild	2.70805	-1.84417	ID.11.1024	ID.11
1029	0.881588	15	wild	2.70805	-1.83667	ID.11.1029	ID.11
1029	0.881588	20	wild	2.99573	-1.83667	ID.11.1029	ID.11
1029	0.881588	10	wild	2.30259	-1.83667	ID.11.1029	ID.11
1029	0.881588	20	wild	2.99573	-1.83667	ID.11.1029	ID.11
1029	0.881588	60	wild	4.09434	-1.83667	ID.11.1029	ID.11
1029	0.881588	15	wild	2.70805	-1.83667	ID.11.1029	ID.11
1029	0.881588	30	wild	3.4012	-1.83667	ID.11.1029	ID.11
1029	0.881588	120	wild	4.78749	-1.83667	ID.11.1029	ID.11
1029	0.881588	20	wild	2.99573	-1.83667	ID.11.1029	ID.11
1029	0.881588	30	wild	3.4012	-1.83667	ID.11.1029	ID.11
1029	0.881588	60	wild	4.09434	-1.83667	ID.11.1029	ID.11
1029	0.881588	15	wild	2.70805	-1.83667	ID.11.1029	ID.11
1029	0.881588	200	wild	5.29832	-1.83667	ID.11.1029	ID.11
1029	0.881588	20	wild	2.99573	-1.83667	ID.11.1029	ID.11
1029	0.881588	30	wild	3.4012	-1.83667	ID.11.1029	ID.11
1029	0.881588	120	wild	4.78749	-1.83667	ID.11.1029	ID.11
1029	0.881588	10	wild	2.30259	-1.83667	ID.11.1029	ID.11
1029	0.881588	15	wild	2.70805	-1.83667	ID.11.1029	ID.11
1029	0.881588	20	wild	2.99573	-1.83667	ID.11.1029	ID.11
1029	0.881588	10	wild	2.30259	-1.83667	ID.11.1029	ID.11
1029	0.881588	20	wild	2.99573	-1.83667	ID.11.1029	ID.11
1029	0.881588	10	wild	2.30259	-1.83667	ID.11.1029	ID.11
1029	0.881588	30	wild	3.4012	-1.83667	ID.11.1029	ID.11
1029	0.881588	60	wild	4.09434	-1.83667	ID.11.1029	ID.11
1029	0.881588	60	wild	4.09434	-1.83667	ID.11.1029	ID.11
1029	0.881588	45	wild	3.80666	-1.83667	ID.11.1029	ID.11
1029	0.881588	60	wild	4.09434	-1.83667	ID.11.1029	ID.11
1029	0.881588	60	wild	4.09434	-1.83667	ID.11.1029	ID.11
1029	0.881588	20	wild	2.99573	-1.83667	ID.11.1029	ID.11
1029	0.881588	35	wild	3.55535	-1.83667	ID.11.1029	ID.11
1029	0.881588	60	wild	4.09434	-1.83667	ID.11.1029	ID.11
1029	0.881588	20	wild	2.99573	-1.83667	ID.11.1029	ID.11
1029	0.881588	15	wild	2.70805	-1.83667	ID.11.1029	ID.11
1029	0.881588	20	wild	2.99573	-1.83667	ID.11.1029	ID.11
1029	0.881588	20	wild	2.99573	-1.83667	ID.11.1029	ID.11
1029	0.881588	60	wild	4.09434	-1.83667	ID.11.1029	ID.11
1029	0.881588	30	wild	3.4012	-1.83667	ID.11.1029	ID.11
1029	0.881588	20	wild	2.99573	-1.83667	ID.11.1029	ID.11
1029	0.881588	30	wild	3.4012	-1.83667	ID.11.1029	ID.11
1029	0.881588	10	wild	2.30259	-1.83667	ID.11.1029	ID.11
1029	0.881588	240	wild	5.48064	-1.83667	ID.11.1029	ID.11
1029	0.881588	10	wild	2.30259	-1.83667	ID.11.1029	ID.11
1029	0.881588	60	wild	4.09434	-1.83667	ID.11.1029	ID.11
1029	0.881588	30	wild	3.4012	-1.83667	ID.11.1029	ID.11
1029	0.881588	20	wild	2.99573	-1.83667	ID.11.1029	ID.11
1029	0.881588	30	wild	3.4012	-1.83667	ID.11.1029	ID.11
1029	0.881588	20	wild	2.99573	-1.83667	ID.11.1029	ID.11
1029	0.881588	105	wild	4.65396	-1.83667	ID.11.1029	ID.11
1029	0.881588	180	wild	5.19296	-1.83667	ID.11.1029	ID.11
1029	0.881588	30	wild	3.4012	-1.83667	ID.11.1029	ID.11
1029	0.881588	30	wild	3.4012	-1.83667	ID.11.1029	ID.11
1029	0.881588	120	wild	4.78749	-1.83667	ID.11.1029	ID.11
1029	0.881588	20	wild	2.99573	-1.83667	ID.11.1029	ID.11
1029	0.881588	60	wild	4.09434	-1.83667	ID.11.1029	ID.11
1029	0.881588	60	wild	4.09434	-1.83667	ID.11.1029	ID.11
1029	0.881588	60	wild	4.09434	-1.83667	ID.11.1029	ID.11
1029	0.881588	60	wild	4.09434	-1.83667	ID.11.1029	ID.11
1029	0.881588	180	wild	5.19296	-1.83667	ID.11.1029	ID.11
1029	0.881588	300	wild	5.70378	-1.83667	ID.11.1029	ID.11
1029	0.881588	60	wild	4.09434	-1.83667	ID.11.1029	ID.11
1029	0.881588	60	wild	4.09434	-1.83667	ID.11.1029	ID.11
1029	0.881588	10	wild	2.30259	-1.83667	ID.11.1029	ID.11
1029	0.881588	120	wild	4.78749	-1.83667	ID.11.1029	ID.11
1029	0.881588	10	wild	2.30259	-1.83667	ID.11.1029	ID.11
1029	0.881588	60	wild	4.09434	-1.83667	ID.11.1029	ID.11
1029	0.881588	30	wild	3.4012	-1.83667	ID.11.1029	ID.11
1029	0.881588	240	wild	5.48064	-1.83667	ID.11.1029	ID.11
1029	0.881588	60	wild	4.09434	-1.83667	ID.11.1029	ID.11
1029	0.881588	20	wild	2.99573	-1.83667	ID.11.1029	ID.11
1029	0.881588	120	wild	4.78749	-1.83667	ID.11.1029	ID.11
1029	0.881588	30	wild	3.4012	-1.83667	ID.11.1029	ID.11
1029	0.881588	120	wild	4.78749	-1.83667	ID.11.1029	ID.11
1029	0.881588	10	wild	2.30259	-1.83667	ID.11.1029	ID.11
1029	0.881588	20	wild	2.99573	-1.83667	ID.11.1029	ID.11
1029	0.881588	60	wild	4.09434	-1.83667	ID.11.1029	ID.11
1034	0.887064	7	wild	1.94591	-1.82922	ID.11.1034	ID.11
1034	0.887064	10	wild	2.30259	-1.82922	ID.11.1034	ID.11
1034	0.887064	60	wild	4.09434	-1.82922	ID.11.1034	ID.11
1034	0.887064	15	wild	2.70805	-1.82922	ID.11.1034	ID.11
1034	0.887064	60	wild	4.09434	-1.82922	ID.11.1034	ID.11
1034	0.887064	15	wild	2.70805	-1.82922	ID.11.1034	ID.11
1034	0.887064	45	wild	3.80666	-1.82922	ID.11.1034	ID.11
1034	0.887064	30	wild	3.4012	-1.82922	ID.11.1034	ID.11
1034	0.887064	20	wild	2.99573	-1.82922	ID.11.1034	ID.11
1034	0.887064	30	wild	3.4012	-1.82922	ID.11.1034	ID.11
1034	0.887064	15	wild	2.70805	-1.82922	ID.11.1034	ID.11
1034	0.887064	30	wild	3.4012	-1.82922	ID.11.1034	ID.11
1034	0.887064	15	wild	2.70805	-1.82922	ID.11.1034	ID.11
1034	0.887064	180	wild	5.19296	-1.82922	ID.11.1034	ID.11
1034	0.887064	60	wild	4.09434	-1.82922	ID.11.1034	ID.11
1034	0.887064	15	wild	2.70805	-1.82922	ID.11.1034	ID.11
1034	0.887064	120	wild	4.78749	-1.82922	ID.11.1034	ID.11
1034	0.887064	60	wild	4.09434	-1.82922	ID.11.1034	ID.11
1034	0.887064	60	wild	4.09434	-1.82922	ID.11.1034	ID.11
1034	0.887064	60	wild	4.09434	-1.82922	ID.11.1034	ID.11
1034	0.887064	300	wild	5.70378	-1.82922	ID.11.1034	ID.11
1034	0.887064	120	wild	4.78749	-1.82922	ID.11.1034	ID.11
1034	0.887064	120	wild	4.78749	-1.82922	ID.11.1034	ID.11
1034	0.887064	30	wild	3.4012	-1.82922	ID.11.1034	ID.11
1034	0.887064	420	wild	6.04025	-1.82922	ID.11.1034	ID.11
1034	0.887064	180	wild	5.19296	-1.82922	ID.11.1034	ID.11
1034	0.887064	15	wild	2.70805	-1.82922	ID.11.1034	ID.11
1034	0.887064	240	wild	5.48064	-1.82922	ID.11.1034	ID.11
1034	0.887064	480	wild	6.17379	-1.82922	ID.11.1034	ID.11
1034	0.887064	120	wild	4.78749	-1.82922	ID.11.1034	ID.11
1034	0.887064	120	wild	4.78749	-1.82922	ID.11.1034	ID.11
1034	0.887064	120	wild	4.78749	-1.82922	ID.11.1034	ID.11
1034	0.887064	30	wild	3.4012	-1.82922	ID.11.1034	ID.11
1034	0.887064	20	wild	2.99573	-1.82922	ID.11.1034	ID.11
1034	0.887064	60	wild	4.09434	-1.82922	ID.11.1034	ID.11
1034	0.887064	780	wild	6.65929	-1.82922	ID.11.1034	ID.11
1034	0.887064	15	wild	2.70805	-1.82922	ID.11.1034	ID.11
1034	0.887064	60	wild	4.09434	-1.82922	ID.11.1034	ID.11
1034	0.887064	60	wild	4.09434	-1.82922	ID.11.1034	ID.11
1034	0.887064	240	wild	5.48064	-1.82922	ID.11.1034	ID.11
1034	0.887064	60	wild	4.09434	-1.82922	ID.11.1034	ID.11
1034	0.887064	60	wild	4.09434	-1.82922	ID.11.1034	ID.11
1034	0.887064	120	wild	4.78749	-1.82922	ID.11.1034	ID.11
1034	0.887064	15	wild	2.70805	-1.82922	ID.11.1034	ID.11
1034	0.887064	480	wild	6.17379	-1.82922	ID.11.1034	ID.11
1034	0.887064	15	wild	2.70805	-1.82922	ID.11.1034	ID.11
1034	0.887064	10	wild	2.30259	-1.82922	ID.11.1034	ID.11
1034	0.887064	20	wild	2.99573	-1.82922	ID.11.1034	ID.11
1034	0.887064	20	wild	2.99573	-1.82922	ID.11.1034	ID.11
1034	0.887064	20	wild	2.99573	-1.82922	ID.11.1034	ID.11
1034	0.887064	120	wild	4.78749	-1.82922	ID.11.1034	ID.11
1034	0.887064	1020	wild	6.92756	-1.82922	ID.11.1034	ID.11
1034	0.887064	360	wild	5.8861	-1.82922	ID.11.1034	ID.11
1034	0.887064	20	wild	2.99573	-1.82922	ID.11.1034	ID.11
1034	0.887064	120	wild	4.78749	-1.82922	ID.11.1034	ID.11
1034	0.887064	180	wild	5.19296	-1.82922	ID.11.1034	ID.11
1034	0.887064	10	wild	2.30259	-1.82922	ID.11.1034	ID.11
1034	0.887064	120	wild	4.78749	-1.82922	ID.11.1034	ID.11
1036	0.889802	240	wild	5.48064	-1.82551	ID.11.1036	ID.11
1036	0.889802	20	wild	2.99573	-1.82551	ID.11.1036	ID.11
1036	0.889802	15	wild	2.70805	-1.82551	ID.11.1036	ID.11
1036	0.889802	30	wild	3.4012	-1.82551	ID.11.1036	ID.11
1036	0.889802	10	wild	2.30259	-1.82551	ID.11.1036	ID.11
1036	0.889802	15	wild	2.70805	-1.82551	ID.11.1036	ID.11
1036	0.889802	20	wild	2.99573	-1.82551	ID.11.1036	ID.11
1036	0.889802	30	wild	3.4012	-1.82551	ID.11.1036	ID.11
1036	0.889802	15	wild	2.70805	-1.82551	ID.11.1036	ID.11
1036	0.889802	15	wild	2.70805	-1.82551	ID.11.1036	ID.11
1036	0.889802	60	wild	4.09434	-1.82551	ID.11.1036	ID.11
1036	0.889802	30	wild	3.4012	-1.82551	ID.11.1036	ID.11
1036	0.889802	40	wild	3.68888	-1.82551	ID.11.1036	ID.11
1036	0.889802	10	wild	2.30259	-1.82551	ID.11.1036	ID.11
1036	0.889802	120	wild	4.78749	-1.82551	ID.11.1036	ID.11
1036	0.889802	20	wild	2.99573	-1.82551	ID.11.1036	ID.11
1036	0.889802	20	wild	2.99573	-1.82551	ID.11.1036	ID.11
1036	0.889802	20	wild	2.99573	-1.82551	ID.11.1036	ID.11
1036	0.889802	10	wild	2.30259	-1.82551	ID.11.1036	ID.11
1036	0.889802	90	wild	4.49981	-1.82551	ID.11.1036	ID.11
1036	0.889802	10	wild	2.30259	-1.82551	ID.11.1036	ID.11
1036	0.889802	20	wild	2.99573	-1.82551	ID.11.1036	ID.11
1036	0.889802	30	wild	3.4012	-1.82551	ID.11.1036	ID.11
1036	0.889802	20	wild	2.99573	-1.82551	ID.11.1036	ID.11
1036	0.889802	60	wild	4.09434	-1.82551	ID.11.1036	ID.11
1036	0.889802	30	wild	3.4012	-1.82551	ID.11.1036	ID.11
1036	0.889802	15	wild	2.70805	-1.82551	ID.11.1036	ID.11
1036	0.889802	60	wild	4.09434	-1.82551	ID.11.1036	ID.11
1036	0.889802	60	wild	4.09434	-1.82551	ID.11.1036	ID.11
1036	0.889802	20	wild	2.99573	-1.82551	ID.11.1036	ID.11
1036	0.889802	15	wild	2.70805	-1.82551	ID.11.1036	ID.11
1036	0.889802	30	wild	3.4012	-1.82551	ID.11.1036	ID.11
1036	0.889802	60	wild	4.09434	-1.82551	ID.11.1036	ID.11
1036	0.889802	15	wild	2.70805	-1.82551	ID.11.1036	ID.11
1036	0.889802	30	wild	3.4012	-1.82551	ID.11.1036	ID.11
1036	0.889802	60	wild	4.09434	-1.82551	ID.11.1036	ID.11
1036	0.889802	60	wild	4.09434	-1.82551	ID.11.1036	ID.11
1036	0.889802	300	wild	5.70378	-1.82551	ID.11.1036	ID.11
1036	0.889802	20	wild	2.99573	-1.82551	ID.11.1036	ID.11
1036	0.889802	30	wild	3.4012	-1.82551	ID.11.1036	ID.11
1036	0.889802	60	wild	4.09434	-1.82551	ID.11.1036	ID.11
1036	0.889802	60	wild	4.09434	-1.82551	ID.11.1036	ID.11
1036	0.889802	25	wild	3.21888	-1.82551	ID.11.1036	ID.11
1036	0.889802	60	wild	4.09434	-1.82551	ID.11.1036	ID.11
1036	0.889802	450	wild	6.10925	-1.82551	ID.11.1036	ID.11
1036	0.889802	10	wild	2.30259	-1.82551	ID.11.1036	ID.11
1036	0.889802	15	wild	2.70805	-1.82551	ID.11.1036	ID.11
1036	0.889802	15	wild	2.70805	-1.82551	ID.11.1036	ID.11
1036	0.889802	20	wild	2.99573	-1.82551	ID.11.1036	ID.11
1036	0.889802	60	wild	4.09434	-1.82551	ID.11.1036	ID.11
1036	0.889802	120	wild	4.78749	-1.82551	ID.11.1036	ID.11
1036	0.889802	15	wild	2.70805	-1.82551	ID.11.1036	ID.11
1036	0.889802	20	wild	2.99573	-1.82551	ID.11.1036	ID.11
1036	0.889802	15	wild	2.70805	-1.82551	ID.11.1036	ID.11
1036	0.889802	60	wild	4.09434	-1.82551	ID.11.1036	ID.11
1036	0.889802	420	wild	6.04025	-1.82551	ID.11.1036	ID.11
1036	0.889802	20	wild	2.99573	-1.82551	ID.11.1036	ID.11
1036	0.889802	10	wild	2.30259	-1.82551	ID.11.1036	ID.11
1036	0.889802	60	wild	4.09434	-1.82551	ID.11.1036	ID.11
1036	0.889802	60	wild	4.09434	-1.82551	ID.11.1036	ID.11
1038	0.892539	60	wild	4.09434	-1.82181	ID.11.1038	ID.11
1038	0.892539	180	wild	5.19296	-1.82181	ID.11.1038	ID.11
1038	0.892539	30	wild	3.4012	-1.82181	ID.11.1038	ID.11
1038	0.892539	15	wild	2.70805	-1.82181	ID.11.1038	ID.11
1038	0.892539	240	wild	5.48064	-1.82181	ID.11.1038	ID.11
1038	0.892539	35	wild	3.55535	-1.82181	ID.11.1038	ID.11
1038	0.892539	20	wild	2.99573	-1.82181	ID.11.1038	ID.11
1038	0.892539	30	wild	3.4012	-1.82181	ID.11.1038	ID.11
1038	0.892539	10	wild	2.30259	-1.82181	ID.11.1038	ID.11
1038	0.892539	240	wild	5.48064	-1.82181	ID.11.1038	ID.11
1038	0.892539	10	wild	2.30259	-1.82181	ID.11.1038	ID.11
1038	0.892539	120	wild	4.78749	-1.82181	ID.11.1038	ID.11
1038	0.892539	300	wild	5.70378	-1.82181	ID.11.1038	ID.11
1038	0.892539	20	wild	2.99573	-1.82181	ID.11.1038	ID.11
1038	0.892539	300	wild	5.70378	-1.82181	ID.11.1038	ID.11
1038	0.892539	15	wild	2.70805	-1.82181	ID.11.1038	ID.11
1038	0.892539	180	wild	5.19296	-1.82181	ID.11.1038	ID.11
1038	0.892539	40	wild	3.68888	-1.82181	ID.11.1038	ID.11
1038	0.892539	10	wild	2.30259	-1.82181	ID.11.1038	ID.11
1038	0.892539	15	wild	2.70805	-1.82181	ID.11.1038	ID.11
1038	0.892539	10	wild	2.30259	-1.82181	ID.11.1038	ID.11
1038	0.892539	20	wild	2.99573	-1.82181	ID.11.1038	ID.11
1038	0.892539	30	wild	3.4012	-1.82181	ID.11.1038	ID.11
1038	0.892539	10	wild	2.30259	-1.82181	ID.11.1038	ID.11
1038	0.892539	180	wild	5.19296	-1.82181	ID.11.1038	ID.11
1038	0.892539	120	wild	4.78749	-1.82181	ID.11.1038	ID.11
1038	0.892539	20	wild	2.99573	-1.82181	ID.11.1038	ID.11
1038	0.892539	10	wild	2.30259	-1.82181	ID.11.1038	ID.11
1038	0.892539	15	wild	2.70805	-1.82181	ID.11.1038	ID.11
1038	0.892539	10	wild	2.30259	-1.82181	ID.11.1038	ID.11
1038	0.892539	180	wild	5.19296	-1.82181	ID.11.1038	ID.11
1038	0.892539	60	wild	4.09434	-1.82181	ID.11.1038	ID.11
1038	0.892539	20	wild	2.99573	-1.82181	ID.11.1038	ID.11
1038	0.892539	25	wild	3.21888	-1.82181	ID.11.1038	ID.11
1038	0.892539	20	wild	2.99573	-1.82181	ID.11.1038	ID.11
1044	2.91307	30	wild	3.4012	-0.398302	ID.41.1044	ID.41
1038	0.892539	15	wild	2.70805	-1.82181	ID.11.1038	ID.11
1038	0.892539	10	wild	2.30259	-1.82181	ID.11.1038	ID.11
1038	0.892539	15	wild	2.70805	-1.82181	ID.11.1038	ID.11
1038	0.892539	120	wild	4.78749	-1.82181	ID.11.1038	ID.11
1038	0.892539	10	wild	2.30259	-1.82181	ID.11.1038	ID.11
1038	0.892539	10	wild	2.30259	-1.82181	ID.11.1038	ID.11
1038	0.892539	30	wild	3.4012	-1.82181	ID.11.1038	ID.11
1038	0.892539	120	wild	4.78749	-1.82181	ID.11.1038	ID.11
1038	0.892539	20	wild	2.99573	-1.82181	ID.11.1038	ID.11
1038	0.892539	25	wild	3.21888	-1.82181	ID.11.1038	ID.11
1038	0.892539	15	wild	2.70805	-1.82181	ID.11.1038	ID.11
1038	0.892539	30	wild	3.4012	-1.82181	ID.11.1038	ID.11
1038	0.892539	20	wild	2.99573	-1.82181	ID.11.1038	ID.11
1038	0.892539	10	wild	2.30259	-1.82181	ID.11.1038	ID.11
1038	0.892539	15	wild	2.70805	-1.82181	ID.11.1038	ID.11
1038	0.892539	20	wild	2.99573	-1.82181	ID.11.1038	ID.11
1038	0.892539	15	wild	2.70805	-1.82181	ID.11.1038	ID.11
1038	0.892539	10	wild	2.30259	-1.82181	ID.11.1038	ID.11
1038	0.892539	20	wild	2.99573	-1.82181	ID.11.1038	ID.11
1038	0.892539	30	wild	3.4012	-1.82181	ID.11.1038	ID.11
1038	0.892539	15	wild	2.70805	-1.82181	ID.11.1038	ID.11
1038	0.892539	15	wild	2.70805	-1.82181	ID.11.1038	ID.11
1038	0.892539	180	wild	5.19296	-1.82181	ID.11.1038	ID.11
1038	0.892539	10	wild	2.30259	-1.82181	ID.11.1038	ID.11
1038	0.892539	15	wild	2.70805	-1.82181	ID.11.1038	ID.11
1038	0.892539	60	wild	4.09434	-1.82181	ID.11.1038	ID.11
1038	0.892539	10	wild	2.30259	-1.82181	ID.11.1038	ID.11
1048	2.91581	90	wild	4.49981	-0.397172	ID.41.1048	ID.41
1048	2.91581	60	wild	4.09434	-0.397172	ID.41.1048	ID.41
1048	2.91581	60	wild	4.09434	-0.397172	ID.41.1048	ID.41
1048	2.91581	60	wild	4.09434	-0.397172	ID.41.1048	ID.41
1048	2.91581	30	wild	3.4012	-0.397172	ID.41.1048	ID.41
1044	2.91307	30	wild	3.4012	-0.398302	ID.41.1044	ID.41
1044	2.91307	60	wild	4.09434	-0.398302	ID.41.1044	ID.41
1051	2.91855	30	wild	3.4012	-0.396042	ID.41.1051	ID.41
1044	2.91307	10	wild	2.30259	-0.398302	ID.41.1044	ID.41
1044	2.91307	45	wild	3.80666	-0.398302	ID.41.1044	ID.41
1044	2.91307	180	wild	5.19296	-0.398302	ID.41.1044	ID.41
1044	2.91307	10	wild	2.30259	-0.398302	ID.41.1044	ID.41
1044	2.91307	10	wild	2.30259	-0.398302	ID.41.1044	ID.41
1800	6.53525	20	wild	2.99573	0.574057	ID.41.1800	ID.41
1044	2.91307	60	wild	4.09434	-0.398302	ID.41.1044	ID.41
1044	2.91307	15	wild	2.70805	-0.398302	ID.41.1044	ID.41
1044	2.91307	20	wild	2.99573	-0.398302	ID.41.1044	ID.41
1044	2.91307	10	wild	2.30259	-0.398302	ID.41.1044	ID.41
1044	2.91307	60	wild	4.09434	-0.398302	ID.41.1044	ID.41
1044	2.91307	30	wild	3.4012	-0.398302	ID.41.1044	ID.41
1044	2.91307	30	wild	3.4012	-0.398302	ID.41.1044	ID.41
1044	2.91307	15	wild	2.70805	-0.398302	ID.41.1044	ID.41
1044	2.91307	60	wild	4.09434	-0.398302	ID.41.1044	ID.41
1044	2.91307	25	wild	3.21888	-0.398302	ID.41.1044	ID.41
1044	2.91307	30	wild	3.4012	-0.398302	ID.41.1044	ID.41
1044	2.91307	30	wild	3.4012	-0.398302	ID.41.1044	ID.41
1044	2.91307	10	wild	2.30259	-0.398302	ID.41.1044	ID.41
1044	2.91307	15	wild	2.70805	-0.398302	ID.41.1044	ID.41
1044	2.91307	20	wild	2.99573	-0.398302	ID.41.1044	ID.41
1044	2.91307	15	wild	2.70805	-0.398302	ID.41.1044	ID.41
1044	2.91307	15	wild	2.70805	-0.398302	ID.41.1044	ID.41
1044	2.91307	15	wild	2.70805	-0.398302	ID.41.1044	ID.41
1044	2.91307	10	wild	2.30259	-0.398302	ID.41.1044	ID.41
1044	2.91307	60	wild	4.09434	-0.398302	ID.41.1044	ID.41
1044	2.91307	180	wild	5.19296	-0.398302	ID.41.1044	ID.41
1044	2.91307	60	wild	4.09434	-0.398302	ID.41.1044	ID.41
1044	2.91307	25	wild	3.21888	-0.398302	ID.41.1044	ID.41
1044	2.91307	600	wild	6.39693	-0.398302	ID.41.1044	ID.41
1044	2.91307	20	wild	2.99573	-0.398302	ID.41.1044	ID.41
1044	2.91307	30	wild	3.4012	-0.398302	ID.41.1044	ID.41
1044	2.91307	60	wild	4.09434	-0.398302	ID.41.1044	ID.41
1804	4.87064	20	wild	2.99573	0.220271	ID.33.1804	ID.33
1044	2.91307	240	wild	5.48064	-0.398302	ID.41.1044	ID.41
1804	4.87064	480	wild	6.17379	0.220271	ID.33.1804	ID.33
1048	2.91581	60	wild	4.09434	-0.397172	ID.41.1048	ID.41
1048	2.91581	20	wild	2.99573	-0.397172	ID.41.1048	ID.41
1048	2.91581	420	wild	6.04025	-0.397172	ID.41.1048	ID.41
1048	2.91581	15	wild	2.70805	-0.397172	ID.41.1048	ID.41
1048	2.91581	360	wild	5.8861	-0.397172	ID.41.1048	ID.41
1048	2.91581	10	wild	2.30259	-0.397172	ID.41.1048	ID.41
1048	2.91581	60	wild	4.09434	-0.397172	ID.41.1048	ID.41
1048	2.91581	15	wild	2.70805	-0.397172	ID.41.1048	ID.41
1048	2.91581	10	wild	2.30259	-0.397172	ID.41.1048	ID.41
1048	2.91581	20	wild	2.99573	-0.397172	ID.41.1048	ID.41
1048	2.91581	360	wild	5.8861	-0.397172	ID.41.1048	ID.41
1048	2.91581	30	wild	3.4012	-0.397172	ID.41.1048	ID.41
1048	2.91581	30	wild	3.4012	-0.397172	ID.41.1048	ID.41
1048	2.91581	15	wild	2.70805	-0.397172	ID.41.1048	ID.41
1048	2.91581	60	wild	4.09434	-0.397172	ID.41.1048	ID.41
1048	2.91581	540	wild	6.29157	-0.397172	ID.41.1048	ID.41
1048	2.91581	20	wild	2.99573	-0.397172	ID.41.1048	ID.41
1048	2.91581	20	wild	2.99573	-0.397172	ID.41.1048	ID.41
1048	2.91581	30	wild	3.4012	-0.397172	ID.41.1048	ID.41
1048	2.91581	150	wild	5.01064	-0.397172	ID.41.1048	ID.41
1048	2.91581	25	wild	3.21888	-0.397172	ID.41.1048	ID.41
1048	2.91581	60	wild	4.09434	-0.397172	ID.41.1048	ID.41
1048	2.91581	10	wild	2.30259	-0.397172	ID.41.1048	ID.41
1048	2.91581	15	wild	2.70805	-0.397172	ID.41.1048	ID.41
1048	2.91581	15	wild	2.70805	-0.397172	ID.41.1048	ID.41
1804	4.87064	360	wild	5.8861	0.220271	ID.33.1804	ID.33
1048	2.91581	45	wild	3.80666	-0.397172	ID.41.1048	ID.41
1048	2.91581	30	wild	3.4012	-0.397172	ID.41.1048	ID.41
1048	2.91581	20	wild	2.99573	-0.397172	ID.41.1048	ID.41
1048	2.91581	30	wild	3.4012	-0.397172	ID.41.1048	ID.41
1048	2.91581	75	wild	4.31749	-0.397172	ID.41.1048	ID.41
1048	2.91581	60	wild	4.09434	-0.397172	ID.41.1048	ID.41
1048	2.91581	15	wild	2.70805	-0.397172	ID.41.1048	ID.41
1048	2.91581	20	wild	2.99573	-0.397172	ID.41.1048	ID.41
1048	2.91581	30	wild	3.4012	-0.397172	ID.41.1048	ID.41
1048	2.91581	60	wild	4.09434	-0.397172	ID.41.1048	ID.41
1048	2.91581	120	wild	4.78749	-0.397172	ID.41.1048	ID.41
1048	2.91581	60	wild	4.09434	-0.397172	ID.41.1048	ID.41
1048	2.91581	45	wild	3.80666	-0.397172	ID.41.1048	ID.41
1048	2.91581	15	wild	2.70805	-0.397172	ID.41.1048	ID.41
1048	2.91581	10	wild	2.30259	-0.397172	ID.41.1048	ID.41
1048	2.91581	45	wild	3.80666	-0.397172	ID.41.1048	ID.41
1048	2.91581	30	wild	3.4012	-0.397172	ID.41.1048	ID.41
1048	2.91581	15	wild	2.70805	-0.397172	ID.41.1048	ID.41
1048	2.91581	60	wild	4.09434	-0.397172	ID.41.1048	ID.41
1048	2.91581	30	wild	3.4012	-0.397172	ID.41.1048	ID.41
1048	2.91581	15	wild	2.70805	-0.397172	ID.41.1048	ID.41
1048	2.91581	10	wild	2.30259	-0.397172	ID.41.1048	ID.41
1048	2.91581	30	wild	3.4012	-0.397172	ID.41.1048	ID.41
1048	2.91581	15	wild	2.70805	-0.397172	ID.41.1048	ID.41
1048	2.91581	10	wild	2.30259	-0.397172	ID.41.1048	ID.41
1048	2.91581	45	wild	3.80666	-0.397172	ID.41.1048	ID.41
1048	2.91581	15	wild	2.70805	-0.397172	ID.41.1048	ID.41
1048	2.91581	20	wild	2.99573	-0.397172	ID.41.1048	ID.41
1048	2.91581	60	wild	4.09434	-0.397172	ID.41.1048	ID.41
1048	2.91581	180	wild	5.19296	-0.397172	ID.41.1048	ID.41
1048	2.91581	240	wild	5.48064	-0.397172	ID.41.1048	ID.41
1048	2.91581	40	wild	3.68888	-0.397172	ID.41.1048	ID.41
1048	2.91581	30	wild	3.4012	-0.397172	ID.41.1048	ID.41
1048	2.91581	120	wild	4.78749	-0.397172	ID.41.1048	ID.41
1048	2.91581	30	wild	3.4012	-0.397172	ID.41.1048	ID.41
1048	2.91581	240	wild	5.48064	-0.397172	ID.41.1048	ID.41
1048	2.91581	150	wild	5.01064	-0.397172	ID.41.1048	ID.41
1816	2.29706	30	wild	3.4012	-0.684209	ID.5.1816	ID.5
1828	4.89254	20	wild	2.99573	0.22567	ID.33.1828	ID.33
1048	2.91581	25	wild	3.21888	-0.397172	ID.41.1048	ID.41
1048	2.91581	10	wild	2.30259	-0.397172	ID.41.1048	ID.41
1048	2.91581	60	wild	4.09434	-0.397172	ID.41.1048	ID.41
1048	2.91581	10	wild	2.30259	-0.397172	ID.41.1048	ID.41
1048	2.91581	20	wild	2.99573	-0.397172	ID.41.1048	ID.41
1048	2.91581	10	wild	2.30259	-0.397172	ID.41.1048	ID.41
1048	2.91581	150	wild	5.01064	-0.397172	ID.41.1048	ID.41
1048	2.91581	60	wild	4.09434	-0.397172	ID.41.1048	ID.41
1048	2.91581	120	wild	4.78749	-0.397172	ID.41.1048	ID.41
1048	2.91581	30	wild	3.4012	-0.397172	ID.41.1048	ID.41
1048	2.91581	60	wild	4.09434	-0.397172	ID.41.1048	ID.41
1051	2.91855	15	wild	2.70805	-0.396042	ID.41.1051	ID.41
1051	2.91855	10	wild	2.30259	-0.396042	ID.41.1051	ID.41
1051	2.91855	10	wild	2.30259	-0.396042	ID.41.1051	ID.41
1051	2.91855	10	wild	2.30259	-0.396042	ID.41.1051	ID.41
1051	2.91855	15	wild	2.70805	-0.396042	ID.41.1051	ID.41
1051	2.91855	60	wild	4.09434	-0.396042	ID.41.1051	ID.41
1051	2.91855	40	wild	3.68888	-0.396042	ID.41.1051	ID.41
1051	2.91855	10	wild	2.30259	-0.396042	ID.41.1051	ID.41
1828	4.89254	40	wild	3.68888	0.22567	ID.33.1828	ID.33
1051	2.91855	15	wild	2.70805	-0.396042	ID.41.1051	ID.41
1051	2.91855	30	wild	3.4012	-0.396042	ID.41.1051	ID.41
1051	2.91855	60	wild	4.09434	-0.396042	ID.41.1051	ID.41
1051	2.91855	20	wild	2.99573	-0.396042	ID.41.1051	ID.41
1051	2.91855	20	wild	2.99573	-0.396042	ID.41.1051	ID.41
1051	2.91855	360	wild	5.8861	-0.396042	ID.41.1051	ID.41
1051	2.91855	15	wild	2.70805	-0.396042	ID.41.1051	ID.41
1051	2.91855	120	wild	4.78749	-0.396042	ID.41.1051	ID.41
1051	2.91855	15	wild	2.70805	-0.396042	ID.41.1051	ID.41
1051	2.91855	20	wild	2.99573	-0.396042	ID.41.1051	ID.41
1051	2.91855	300	wild	5.70378	-0.396042	ID.41.1051	ID.41
1051	2.91855	15	wild	2.70805	-0.396042	ID.41.1051	ID.41
1051	2.91855	90	wild	4.49981	-0.396042	ID.41.1051	ID.41
1051	2.91855	300	wild	5.70378	-0.396042	ID.41.1051	ID.41
1051	2.91855	15	wild	2.70805	-0.396042	ID.41.1051	ID.41
1051	2.91855	30	wild	3.4012	-0.396042	ID.41.1051	ID.41
1051	2.91855	20	wild	2.99573	-0.396042	ID.41.1051	ID.41
1051	2.91855	15	wild	2.70805	-0.396042	ID.41.1051	ID.41
1051	2.91855	30	wild	3.4012	-0.396042	ID.41.1051	ID.41
1051	2.91855	10	wild	2.30259	-0.396042	ID.41.1051	ID.41
1051	2.91855	10	wild	2.30259	-0.396042	ID.41.1051	ID.41
1051	2.91855	30	wild	3.4012	-0.396042	ID.41.1051	ID.41
1051	2.91855	15	wild	2.70805	-0.396042	ID.41.1051	ID.41
1051	2.91855	15	wild	2.70805	-0.396042	ID.41.1051	ID.41
1051	2.91855	10	wild	2.30259	-0.396042	ID.41.1051	ID.41
1051	2.91855	30	wild	3.4012	-0.396042	ID.41.1051	ID.41
1051	2.91855	120	wild	4.78749	-0.396042	ID.41.1051	ID.41
1051	2.91855	15	wild	2.70805	-0.396042	ID.41.1051	ID.41
1051	2.91855	120	wild	4.78749	-0.396042	ID.41.1051	ID.41
1051	2.91855	30	wild	3.4012	-0.396042	ID.41.1051	ID.41
1051	2.91855	60	wild	4.09434	-0.396042	ID.41.1051	ID.41
1051	2.91855	120	wild	4.78749	-0.396042	ID.41.1051	ID.41
1051	2.91855	20	wild	2.99573	-0.396042	ID.41.1051	ID.41
1150	1.58248	20	wild	2.99573	-1.13264	ID.33.1150	ID.33
1150	1.58248	10	wild	2.30259	-1.13264	ID.33.1150	ID.33
1150	1.58248	40	wild	3.68888	-1.13264	ID.33.1150	ID.33
1150	1.58248	10	wild	2.30259	-1.13264	ID.33.1150	ID.33
1150	1.58248	20	wild	2.99573	-1.13264	ID.33.1150	ID.33
1150	1.58248	15	wild	2.70805	-1.13264	ID.33.1150	ID.33
1150	1.58248	20	wild	2.99573	-1.13264	ID.33.1150	ID.33
1150	1.58248	180	wild	5.19296	-1.13264	ID.33.1150	ID.33
1150	1.58248	60	wild	4.09434	-1.13264	ID.33.1150	ID.33
1150	1.58248	20	wild	2.99573	-1.13264	ID.33.1150	ID.33
1150	1.58248	20	wild	2.99573	-1.13264	ID.33.1150	ID.33
1150	1.58248	30	wild	3.4012	-1.13264	ID.33.1150	ID.33
1150	1.58248	20	wild	2.99573	-1.13264	ID.33.1150	ID.33
1150	1.58248	120	wild	4.78749	-1.13264	ID.33.1150	ID.33
1150	1.58248	240	wild	5.48064	-1.13264	ID.33.1150	ID.33
1150	1.58248	240	wild	5.48064	-1.13264	ID.33.1150	ID.33
1150	1.58248	10	wild	2.30259	-1.13264	ID.33.1150	ID.33
1150	1.58248	300	wild	5.70378	-1.13264	ID.33.1150	ID.33
1150	1.58248	30	wild	3.4012	-1.13264	ID.33.1150	ID.33
1150	1.58248	240	wild	5.48064	-1.13264	ID.33.1150	ID.33
1150	1.58248	60	wild	4.09434	-1.13264	ID.33.1150	ID.33
1150	1.58248	480	wild	6.17379	-1.13264	ID.33.1150	ID.33
1150	1.58248	300	wild	5.70378	-1.13264	ID.33.1150	ID.33
1150	1.58248	30	wild	3.4012	-1.13264	ID.33.1150	ID.33
1150	1.58248	40	wild	3.68888	-1.13264	ID.33.1150	ID.33
1150	1.58248	60	wild	4.09434	-1.13264	ID.33.1150	ID.33
1150	1.58248	20	wild	2.99573	-1.13264	ID.33.1150	ID.33
1150	1.58248	120	wild	4.78749	-1.13264	ID.33.1150	ID.33
1150	1.58248	60	wild	4.09434	-1.13264	ID.33.1150	ID.33
1150	1.58248	30	wild	3.4012	-1.13264	ID.33.1150	ID.33
1150	1.58248	180	wild	5.19296	-1.13264	ID.33.1150	ID.33
1150	1.58248	10	wild	2.30259	-1.13264	ID.33.1150	ID.33
1150	1.58248	60	wild	4.09434	-1.13264	ID.33.1150	ID.33
1150	1.58248	30	wild	3.4012	-1.13264	ID.33.1150	ID.33
1150	1.58248	20	wild	2.99573	-1.13264	ID.33.1150	ID.33
1150	1.58248	540	wild	6.29157	-1.13264	ID.33.1150	ID.33
1150	1.58248	300	wild	5.70378	-1.13264	ID.33.1150	ID.33
1150	1.58248	15	wild	2.70805	-1.13264	ID.33.1150	ID.33
1150	1.58248	20	wild	2.99573	-1.13264	ID.33.1150	ID.33
1150	1.58248	7	wild	1.94591	-1.13264	ID.33.1150	ID.33
1150	1.58248	20	wild	2.99573	-1.13264	ID.33.1150	ID.33
1150	1.58248	15	wild	2.70805	-1.13264	ID.33.1150	ID.33
1150	1.58248	120	wild	4.78749	-1.13264	ID.33.1150	ID.33
1150	1.58248	240	wild	5.48064	-1.13264	ID.33.1150	ID.33
1150	1.58248	10	wild	2.30259	-1.13264	ID.33.1150	ID.33
1150	1.58248	60	wild	4.09434	-1.13264	ID.33.1150	ID.33
1150	1.58248	240	wild	5.48064	-1.13264	ID.33.1150	ID.33
1150	1.58248	30	wild	3.4012	-1.13264	ID.33.1150	ID.33
1150	1.58248	5	wild	1.60944	-1.13264	ID.33.1150	ID.33
1150	1.58248	480	wild	6.17379	-1.13264	ID.33.1150	ID.33
1150	1.58248	20	wild	2.99573	-1.13264	ID.33.1150	ID.33
1150	1.58248	90	wild	4.49981	-1.13264	ID.33.1150	ID.33
1150	1.58248	60	wild	4.09434	-1.13264	ID.33.1150	ID.33
1150	1.58248	90	wild	4.49981	-1.13264	ID.33.1150	ID.33
1150	1.58248	300	wild	5.70378	-1.13264	ID.33.1150	ID.33
1150	1.58248	300	wild	5.70378	-1.13264	ID.33.1150	ID.33
1150	1.58248	15	wild	2.70805	-1.13264	ID.33.1150	ID.33
1150	1.58248	45	wild	3.80666	-1.13264	ID.33.1150	ID.33
1150	1.58248	30	wild	3.4012	-1.13264	ID.33.1150	ID.33
1150	1.58248	20	wild	2.99573	-1.13264	ID.33.1150	ID.33
1150	1.58248	240	wild	5.48064	-1.13264	ID.33.1150	ID.33
1150	1.58248	120	wild	4.78749	-1.13264	ID.33.1150	ID.33
1150	1.58248	45	wild	3.80666	-1.13264	ID.33.1150	ID.33
1150	1.58248	120	wild	4.78749	-1.13264	ID.33.1150	ID.33
1150	1.58248	240	wild	5.48064	-1.13264	ID.33.1150	ID.33
1150	1.58248	15	wild	2.70805	-1.13264	ID.33.1150	ID.33
1150	1.58248	180	wild	5.19296	-1.13264	ID.33.1150	ID.33
1153	1.58522	60	wild	4.09434	-1.13056	ID.33.1153	ID.33
1153	1.58522	600	wild	6.39693	-1.13056	ID.33.1153	ID.33
1153	1.58522	120	wild	4.78749	-1.13056	ID.33.1153	ID.33
1153	1.58522	30	wild	3.4012	-1.13056	ID.33.1153	ID.33
1153	1.58522	480	wild	6.17379	-1.13056	ID.33.1153	ID.33
1153	1.58522	20	wild	2.99573	-1.13056	ID.33.1153	ID.33
1153	1.58522	20	wild	2.99573	-1.13056	ID.33.1153	ID.33
1153	1.58522	10	wild	2.30259	-1.13056	ID.33.1153	ID.33
1153	1.58522	45	wild	3.80666	-1.13056	ID.33.1153	ID.33
1153	1.58522	20	wild	2.99573	-1.13056	ID.33.1153	ID.33
1153	1.58522	15	wild	2.70805	-1.13056	ID.33.1153	ID.33
1153	1.58522	10	wild	2.30259	-1.13056	ID.33.1153	ID.33
1153	1.58522	10	wild	2.30259	-1.13056	ID.33.1153	ID.33
1153	1.58522	20	wild	2.99573	-1.13056	ID.33.1153	ID.33
1153	1.58522	180	wild	5.19296	-1.13056	ID.33.1153	ID.33
1153	1.58522	180	wild	5.19296	-1.13056	ID.33.1153	ID.33
1153	1.58522	10	wild	2.30259	-1.13056	ID.33.1153	ID.33
1153	1.58522	20	wild	2.99573	-1.13056	ID.33.1153	ID.33
1153	1.58522	20	wild	2.99573	-1.13056	ID.33.1153	ID.33
1153	1.58522	5	wild	1.60944	-1.13056	ID.33.1153	ID.33
1153	1.58522	15	wild	2.70805	-1.13056	ID.33.1153	ID.33
1153	1.58522	10	wild	2.30259	-1.13056	ID.33.1153	ID.33
1153	1.58522	20	wild	2.99573	-1.13056	ID.33.1153	ID.33
1153	1.58522	20	wild	2.99573	-1.13056	ID.33.1153	ID.33
1153	1.58522	10	wild	2.30259	-1.13056	ID.33.1153	ID.33
1153	1.58522	15	wild	2.70805	-1.13056	ID.33.1153	ID.33
1153	1.58522	10	wild	2.30259	-1.13056	ID.33.1153	ID.33
1153	1.58522	180	wild	5.19296	-1.13056	ID.33.1153	ID.33
1153	1.58522	10	wild	2.30259	-1.13056	ID.33.1153	ID.33
1153	1.58522	480	wild	6.17379	-1.13056	ID.33.1153	ID.33
1153	1.58522	30	wild	3.4012	-1.13056	ID.33.1153	ID.33
1153	1.58522	60	wild	4.09434	-1.13056	ID.33.1153	ID.33
1153	1.58522	120	wild	4.78749	-1.13056	ID.33.1153	ID.33
1153	1.58522	60	wild	4.09434	-1.13056	ID.33.1153	ID.33
1153	1.58522	1800	wild	7.49554	-1.13056	ID.33.1153	ID.33
1153	1.58522	180	wild	5.19296	-1.13056	ID.33.1153	ID.33
1153	1.58522	45	wild	3.80666	-1.13056	ID.33.1153	ID.33
1153	1.58522	20	wild	2.99573	-1.13056	ID.33.1153	ID.33
1153	1.58522	10	wild	2.30259	-1.13056	ID.33.1153	ID.33
1153	1.58522	60	wild	4.09434	-1.13056	ID.33.1153	ID.33
1153	1.58522	10	wild	2.30259	-1.13056	ID.33.1153	ID.33
1153	1.58522	10	wild	2.30259	-1.13056	ID.33.1153	ID.33
1153	1.58522	5	wild	1.60944	-1.13056	ID.33.1153	ID.33
1153	1.58522	360	wild	5.8861	-1.13056	ID.33.1153	ID.33
1153	1.58522	90	wild	4.49981	-1.13056	ID.33.1153	ID.33
1153	1.58522	120	wild	4.78749	-1.13056	ID.33.1153	ID.33
1153	1.58522	120	wild	4.78749	-1.13056	ID.33.1153	ID.33
1153	1.58522	15	wild	2.70805	-1.13056	ID.33.1153	ID.33
1153	1.58522	30	wild	3.4012	-1.13056	ID.33.1153	ID.33
1153	1.58522	15	wild	2.70805	-1.13056	ID.33.1153	ID.33
1153	1.58522	20	wild	2.99573	-1.13056	ID.33.1153	ID.33
1153	1.58522	180	wild	5.19296	-1.13056	ID.33.1153	ID.33
1153	1.58522	900	wild	6.80239	-1.13056	ID.33.1153	ID.33
1153	1.58522	20	wild	2.99573	-1.13056	ID.33.1153	ID.33
1153	1.58522	150	wild	5.01064	-1.13056	ID.33.1153	ID.33
1153	1.58522	40	wild	3.68888	-1.13056	ID.33.1153	ID.33
1153	1.58522	240	wild	5.48064	-1.13056	ID.33.1153	ID.33
1153	1.58522	90	wild	4.49981	-1.13056	ID.33.1153	ID.33
1153	1.58522	60	wild	4.09434	-1.13056	ID.33.1153	ID.33
1153	1.58522	300	wild	5.70378	-1.13056	ID.33.1153	ID.33
1153	1.58522	15	wild	2.70805	-1.13056	ID.33.1153	ID.33
1153	1.58522	30	wild	3.4012	-1.13056	ID.33.1153	ID.33
1153	1.58522	45	wild	3.80666	-1.13056	ID.33.1153	ID.33
1158	1.59069	15	wild	2.70805	-1.12641	ID.33.1158	ID.33
1158	1.59069	300	wild	5.70378	-1.12641	ID.33.1158	ID.33
1158	1.59069	240	wild	5.48064	-1.12641	ID.33.1158	ID.33
1158	1.59069	120	wild	4.78749	-1.12641	ID.33.1158	ID.33
1158	1.59069	180	wild	5.19296	-1.12641	ID.33.1158	ID.33
1158	1.59069	480	wild	6.17379	-1.12641	ID.33.1158	ID.33
1158	1.59069	120	wild	4.78749	-1.12641	ID.33.1158	ID.33
1158	1.59069	120	wild	4.78749	-1.12641	ID.33.1158	ID.33
1158	1.59069	60	wild	4.09434	-1.12641	ID.33.1158	ID.33
1158	1.59069	120	wild	4.78749	-1.12641	ID.33.1158	ID.33
1158	1.59069	180	wild	5.19296	-1.12641	ID.33.1158	ID.33
1158	1.59069	300	wild	5.70378	-1.12641	ID.33.1158	ID.33
1158	1.59069	240	wild	5.48064	-1.12641	ID.33.1158	ID.33
1158	1.59069	360	wild	5.8861	-1.12641	ID.33.1158	ID.33
1158	1.59069	10	wild	2.30259	-1.12641	ID.33.1158	ID.33
1158	1.59069	20	wild	2.99573	-1.12641	ID.33.1158	ID.33
1158	1.59069	20	wild	2.99573	-1.12641	ID.33.1158	ID.33
1158	1.59069	300	wild	5.70378	-1.12641	ID.33.1158	ID.33
1158	1.59069	180	wild	5.19296	-1.12641	ID.33.1158	ID.33
1158	1.59069	20	wild	2.99573	-1.12641	ID.33.1158	ID.33
1158	1.59069	30	wild	3.4012	-1.12641	ID.33.1158	ID.33
1158	1.59069	35	wild	3.55535	-1.12641	ID.33.1158	ID.33
1158	1.59069	60	wild	4.09434	-1.12641	ID.33.1158	ID.33
1158	1.59069	60	wild	4.09434	-1.12641	ID.33.1158	ID.33
1158	1.59069	15	wild	2.70805	-1.12641	ID.33.1158	ID.33
1158	1.59069	240	wild	5.48064	-1.12641	ID.33.1158	ID.33
1158	1.59069	10	wild	2.30259	-1.12641	ID.33.1158	ID.33
1158	1.59069	20	wild	2.99573	-1.12641	ID.33.1158	ID.33
1158	1.59069	15	wild	2.70805	-1.12641	ID.33.1158	ID.33
1158	1.59069	15	wild	2.70805	-1.12641	ID.33.1158	ID.33
1158	1.59069	20	wild	2.99573	-1.12641	ID.33.1158	ID.33
1158	1.59069	300	wild	5.70378	-1.12641	ID.33.1158	ID.33
1158	1.59069	15	wild	2.70805	-1.12641	ID.33.1158	ID.33
1158	1.59069	180	wild	5.19296	-1.12641	ID.33.1158	ID.33
1158	1.59069	120	wild	4.78749	-1.12641	ID.33.1158	ID.33
1158	1.59069	60	wild	4.09434	-1.12641	ID.33.1158	ID.33
1158	1.59069	240	wild	5.48064	-1.12641	ID.33.1158	ID.33
1158	1.59069	60	wild	4.09434	-1.12641	ID.33.1158	ID.33
1158	1.59069	120	wild	4.78749	-1.12641	ID.33.1158	ID.33
1158	1.59069	90	wild	4.49981	-1.12641	ID.33.1158	ID.33
1158	1.59069	15	wild	2.70805	-1.12641	ID.33.1158	ID.33
1158	1.59069	20	wild	2.99573	-1.12641	ID.33.1158	ID.33
1158	1.59069	180	wild	5.19296	-1.12641	ID.33.1158	ID.33
1160	1.59343	20	wild	2.99573	-1.12435	ID.33.1160	ID.33
1160	1.59343	10	wild	2.30259	-1.12435	ID.33.1160	ID.33
1160	1.59343	20	wild	2.99573	-1.12435	ID.33.1160	ID.33
1160	1.59343	5	wild	1.60944	-1.12435	ID.33.1160	ID.33
1160	1.59343	15	wild	2.70805	-1.12435	ID.33.1160	ID.33
1160	1.59343	60	wild	4.09434	-1.12435	ID.33.1160	ID.33
1160	1.59343	10	wild	2.30259	-1.12435	ID.33.1160	ID.33
1160	1.59343	60	wild	4.09434	-1.12435	ID.33.1160	ID.33
1160	1.59343	90	wild	4.49981	-1.12435	ID.33.1160	ID.33
1160	1.59343	10	wild	2.30259	-1.12435	ID.33.1160	ID.33
1160	1.59343	15	wild	2.70805	-1.12435	ID.33.1160	ID.33
1160	1.59343	20	wild	2.99573	-1.12435	ID.33.1160	ID.33
1160	1.59343	30	wild	3.4012	-1.12435	ID.33.1160	ID.33
1160	1.59343	15	wild	2.70805	-1.12435	ID.33.1160	ID.33
1160	1.59343	20	wild	2.99573	-1.12435	ID.33.1160	ID.33
1160	1.59343	120	wild	4.78749	-1.12435	ID.33.1160	ID.33
1160	1.59343	10	wild	2.30259	-1.12435	ID.33.1160	ID.33
1160	1.59343	10	wild	2.30259	-1.12435	ID.33.1160	ID.33
1160	1.59343	360	wild	5.8861	-1.12435	ID.33.1160	ID.33
1160	1.59343	30	wild	3.4012	-1.12435	ID.33.1160	ID.33
1160	1.59343	10	wild	2.30259	-1.12435	ID.33.1160	ID.33
1160	1.59343	60	wild	4.09434	-1.12435	ID.33.1160	ID.33
1160	1.59343	20	wild	2.99573	-1.12435	ID.33.1160	ID.33
1160	1.59343	15	wild	2.70805	-1.12435	ID.33.1160	ID.33
1160	1.59343	240	wild	5.48064	-1.12435	ID.33.1160	ID.33
1160	1.59343	15	wild	2.70805	-1.12435	ID.33.1160	ID.33
1160	1.59343	60	wild	4.09434	-1.12435	ID.33.1160	ID.33
1160	1.59343	120	wild	4.78749	-1.12435	ID.33.1160	ID.33
1160	1.59343	20	wild	2.99573	-1.12435	ID.33.1160	ID.33
1160	1.59343	10	wild	2.30259	-1.12435	ID.33.1160	ID.33
1160	1.59343	15	wild	2.70805	-1.12435	ID.33.1160	ID.33
1160	1.59343	90	wild	4.49981	-1.12435	ID.33.1160	ID.33
1160	1.59343	60	wild	4.09434	-1.12435	ID.33.1160	ID.33
1160	1.59343	20	wild	2.99573	-1.12435	ID.33.1160	ID.33
1160	1.59343	15	wild	2.70805	-1.12435	ID.33.1160	ID.33
1160	1.59343	30	wild	3.4012	-1.12435	ID.33.1160	ID.33
1160	1.59343	60	wild	4.09434	-1.12435	ID.33.1160	ID.33
1160	1.59343	30	wild	3.4012	-1.12435	ID.33.1160	ID.33
1160	1.59343	15	wild	2.70805	-1.12435	ID.33.1160	ID.33
1160	1.59343	60	wild	4.09434	-1.12435	ID.33.1160	ID.33
1160	1.59343	90	wild	4.49981	-1.12435	ID.33.1160	ID.33
1160	1.59343	180	wild	5.19296	-1.12435	ID.33.1160	ID.33
1160	1.59343	30	wild	3.4012	-1.12435	ID.33.1160	ID.33
1160	1.59343	10	wild	2.30259	-1.12435	ID.33.1160	ID.33
1160	1.59343	180	wild	5.19296	-1.12435	ID.33.1160	ID.33
1160	1.59343	20	wild	2.99573	-1.12435	ID.33.1160	ID.33
1160	1.59343	10	wild	2.30259	-1.12435	ID.33.1160	ID.33
1160	1.59343	240	wild	5.48064	-1.12435	ID.33.1160	ID.33
1160	1.59343	300	wild	5.70378	-1.12435	ID.33.1160	ID.33
1160	1.59343	360	wild	5.8861	-1.12435	ID.33.1160	ID.33
1160	1.59343	60	wild	4.09434	-1.12435	ID.33.1160	ID.33
1160	1.59343	20	wild	2.99573	-1.12435	ID.33.1160	ID.33
1160	1.59343	10	wild	2.30259	-1.12435	ID.33.1160	ID.33
1160	1.59343	10	wild	2.30259	-1.12435	ID.33.1160	ID.33
1160	1.59343	360	wild	5.8861	-1.12435	ID.33.1160	ID.33
1160	1.59343	360	wild	5.8861	-1.12435	ID.33.1160	ID.33
1160	1.59343	60	wild	4.09434	-1.12435	ID.33.1160	ID.33
1160	1.59343	40	wild	3.68888	-1.12435	ID.33.1160	ID.33
1162	1.59617	15	wild	2.70805	-1.12228	ID.33.1162	ID.33
1162	1.59617	60	wild	4.09434	-1.12228	ID.33.1162	ID.33
1162	1.59617	240	wild	5.48064	-1.12228	ID.33.1162	ID.33
1162	1.59617	75	wild	4.31749	-1.12228	ID.33.1162	ID.33
1162	1.59617	240	wild	5.48064	-1.12228	ID.33.1162	ID.33
1162	1.59617	50	wild	3.91202	-1.12228	ID.33.1162	ID.33
1162	1.59617	60	wild	4.09434	-1.12228	ID.33.1162	ID.33
1162	1.59617	20	wild	2.99573	-1.12228	ID.33.1162	ID.33
1162	1.59617	20	wild	2.99573	-1.12228	ID.33.1162	ID.33
1162	1.59617	480	wild	6.17379	-1.12228	ID.33.1162	ID.33
1162	1.59617	20	wild	2.99573	-1.12228	ID.33.1162	ID.33
1162	1.59617	10	wild	2.30259	-1.12228	ID.33.1162	ID.33
1162	1.59617	15	wild	2.70805	-1.12228	ID.33.1162	ID.33
1162	1.59617	10	wild	2.30259	-1.12228	ID.33.1162	ID.33
1162	1.59617	20	wild	2.99573	-1.12228	ID.33.1162	ID.33
1162	1.59617	480	wild	6.17379	-1.12228	ID.33.1162	ID.33
1162	1.59617	30	wild	3.4012	-1.12228	ID.33.1162	ID.33
1162	1.59617	30	wild	3.4012	-1.12228	ID.33.1162	ID.33
1162	1.59617	240	wild	5.48064	-1.12228	ID.33.1162	ID.33
1162	1.59617	180	wild	5.19296	-1.12228	ID.33.1162	ID.33
1162	1.59617	20	wild	2.99573	-1.12228	ID.33.1162	ID.33
1162	1.59617	120	wild	4.78749	-1.12228	ID.33.1162	ID.33
1162	1.59617	20	wild	2.99573	-1.12228	ID.33.1162	ID.33
1162	1.59617	60	wild	4.09434	-1.12228	ID.33.1162	ID.33
1162	1.59617	300	wild	5.70378	-1.12228	ID.33.1162	ID.33
1162	1.59617	15	wild	2.70805	-1.12228	ID.33.1162	ID.33
1162	1.59617	120	wild	4.78749	-1.12228	ID.33.1162	ID.33
1162	1.59617	300	wild	5.70378	-1.12228	ID.33.1162	ID.33
1162	1.59617	30	wild	3.4012	-1.12228	ID.33.1162	ID.33
1162	1.59617	300	wild	5.70378	-1.12228	ID.33.1162	ID.33
1162	1.59617	60	wild	4.09434	-1.12228	ID.33.1162	ID.33
1162	1.59617	120	wild	4.78749	-1.12228	ID.33.1162	ID.33
1162	1.59617	420	wild	6.04025	-1.12228	ID.33.1162	ID.33
1162	1.59617	20	wild	2.99573	-1.12228	ID.33.1162	ID.33
1162	1.59617	15	wild	2.70805	-1.12228	ID.33.1162	ID.33
1162	1.59617	60	wild	4.09434	-1.12228	ID.33.1162	ID.33
1162	1.59617	90	wild	4.49981	-1.12228	ID.33.1162	ID.33
1162	1.59617	30	wild	3.4012	-1.12228	ID.33.1162	ID.33
1162	1.59617	180	wild	5.19296	-1.12228	ID.33.1162	ID.33
1162	1.59617	20	wild	2.99573	-1.12228	ID.33.1162	ID.33
1162	1.59617	30	wild	3.4012	-1.12228	ID.33.1162	ID.33
1162	1.59617	20	wild	2.99573	-1.12228	ID.33.1162	ID.33
1162	1.59617	30	wild	3.4012	-1.12228	ID.33.1162	ID.33
1162	1.59617	10	wild	2.30259	-1.12228	ID.33.1162	ID.33
1162	1.59617	25	wild	3.21888	-1.12228	ID.33.1162	ID.33
1162	1.59617	60	wild	4.09434	-1.12228	ID.33.1162	ID.33
1162	1.59617	15	wild	2.70805	-1.12228	ID.33.1162	ID.33
1162	1.59617	60	wild	4.09434	-1.12228	ID.33.1162	ID.33
1162	1.59617	5	wild	1.60944	-1.12228	ID.33.1162	ID.33
1162	1.59617	20	wild	2.99573	-1.12228	ID.33.1162	ID.33
1162	1.59617	90	wild	4.49981	-1.12228	ID.33.1162	ID.33
1162	1.59617	30	wild	3.4012	-1.12228	ID.33.1162	ID.33
1162	1.59617	420	wild	6.04025	-1.12228	ID.33.1162	ID.33
1162	1.59617	60	wild	4.09434	-1.12228	ID.33.1162	ID.33
1162	1.59617	30	wild	3.4012	-1.12228	ID.33.1162	ID.33
1162	1.59617	60	wild	4.09434	-1.12228	ID.33.1162	ID.33
1162	1.59617	15	wild	2.70805	-1.12228	ID.33.1162	ID.33
1162	1.59617	5	wild	1.60944	-1.12228	ID.33.1162	ID.33
1162	1.59617	10	wild	2.30259	-1.12228	ID.33.1162	ID.33
1162	1.59617	180	wild	5.19296	-1.12228	ID.33.1162	ID.33
1167	1.60164	120	wild	4.78749	-1.11816	ID.33.1167	ID.33
1167	1.60164	20	wild	2.99573	-1.11816	ID.33.1167	ID.33
1167	1.60164	30	wild	3.4012	-1.11816	ID.33.1167	ID.33
1167	1.60164	15	wild	2.70805	-1.11816	ID.33.1167	ID.33
1167	1.60164	20	wild	2.99573	-1.11816	ID.33.1167	ID.33
1167	1.60164	30	wild	3.4012	-1.11816	ID.33.1167	ID.33
1167	1.60164	10	wild	2.30259	-1.11816	ID.33.1167	ID.33
1167	1.60164	11	wild	2.3979	-1.11816	ID.33.1167	ID.33
1167	1.60164	20	wild	2.99573	-1.11816	ID.33.1167	ID.33
1167	1.60164	20	wild	2.99573	-1.11816	ID.33.1167	ID.33
1167	1.60164	10	wild	2.30259	-1.11816	ID.33.1167	ID.33
1167	1.60164	420	wild	6.04025	-1.11816	ID.33.1167	ID.33
1167	1.60164	60	wild	4.09434	-1.11816	ID.33.1167	ID.33
1167	1.60164	10	wild	2.30259	-1.11816	ID.33.1167	ID.33
1167	1.60164	15	wild	2.70805	-1.11816	ID.33.1167	ID.33
1167	1.60164	60	wild	4.09434	-1.11816	ID.33.1167	ID.33
1167	1.60164	20	wild	2.99573	-1.11816	ID.33.1167	ID.33
1167	1.60164	40	wild	3.68888	-1.11816	ID.33.1167	ID.33
1167	1.60164	300	wild	5.70378	-1.11816	ID.33.1167	ID.33
1167	1.60164	25	wild	3.21888	-1.11816	ID.33.1167	ID.33
1167	1.60164	30	wild	3.4012	-1.11816	ID.33.1167	ID.33
1167	1.60164	60	wild	4.09434	-1.11816	ID.33.1167	ID.33
1167	1.60164	60	wild	4.09434	-1.11816	ID.33.1167	ID.33
1167	1.60164	15	wild	2.70805	-1.11816	ID.33.1167	ID.33
1167	1.60164	40	wild	3.68888	-1.11816	ID.33.1167	ID.33
1167	1.60164	20	wild	2.99573	-1.11816	ID.33.1167	ID.33
1167	1.60164	15	wild	2.70805	-1.11816	ID.33.1167	ID.33
1167	1.60164	30	wild	3.4012	-1.11816	ID.33.1167	ID.33
1167	1.60164	60	wild	4.09434	-1.11816	ID.33.1167	ID.33
1167	1.60164	15	wild	2.70805	-1.11816	ID.33.1167	ID.33
1167	1.60164	60	wild	4.09434	-1.11816	ID.33.1167	ID.33
1167	1.60164	600	wild	6.39693	-1.11816	ID.33.1167	ID.33
1167	1.60164	30	wild	3.4012	-1.11816	ID.33.1167	ID.33
1167	1.60164	30	wild	3.4012	-1.11816	ID.33.1167	ID.33
1167	1.60164	25	wild	3.21888	-1.11816	ID.33.1167	ID.33
1167	1.60164	240	wild	5.48064	-1.11816	ID.33.1167	ID.33
1167	1.60164	240	wild	5.48064	-1.11816	ID.33.1167	ID.33
1167	1.60164	240	wild	5.48064	-1.11816	ID.33.1167	ID.33
1167	1.60164	30	wild	3.4012	-1.11816	ID.33.1167	ID.33
1167	1.60164	60	wild	4.09434	-1.11816	ID.33.1167	ID.33
1167	1.60164	180	wild	5.19296	-1.11816	ID.33.1167	ID.33
1167	1.60164	180	wild	5.19296	-1.11816	ID.33.1167	ID.33
1167	1.60164	60	wild	4.09434	-1.11816	ID.33.1167	ID.33
1167	1.60164	60	wild	4.09434	-1.11816	ID.33.1167	ID.33
1167	1.60164	60	wild	4.09434	-1.11816	ID.33.1167	ID.33
1167	1.60164	240	wild	5.48064	-1.11816	ID.33.1167	ID.33
1167	1.60164	30	wild	3.4012	-1.11816	ID.33.1167	ID.33
1167	1.60164	90	wild	4.49981	-1.11816	ID.33.1167	ID.33
1167	1.60164	120	wild	4.78749	-1.11816	ID.33.1167	ID.33
1167	1.60164	30	wild	3.4012	-1.11816	ID.33.1167	ID.33
1167	1.60164	45	wild	3.80666	-1.11816	ID.33.1167	ID.33
1167	1.60164	60	wild	4.09434	-1.11816	ID.33.1167	ID.33
1167	1.60164	30	wild	3.4012	-1.11816	ID.33.1167	ID.33
1167	1.60164	10	wild	2.30259	-1.11816	ID.33.1167	ID.33
1167	1.60164	360	wild	5.8861	-1.11816	ID.33.1167	ID.33
1167	1.60164	20	wild	2.99573	-1.11816	ID.33.1167	ID.33
1167	1.60164	300	wild	5.70378	-1.11816	ID.33.1167	ID.33
1167	1.60164	180	wild	5.19296	-1.11816	ID.33.1167	ID.33
1167	1.60164	20	wild	2.99573	-1.11816	ID.33.1167	ID.33
1167	1.60164	240	wild	5.48064	-1.11816	ID.33.1167	ID.33
1167	1.60164	180	wild	5.19296	-1.11816	ID.33.1167	ID.33
1167	1.60164	15	wild	2.70805	-1.11816	ID.33.1167	ID.33
1167	1.60164	10	wild	2.30259	-1.11816	ID.33.1167	ID.33
1167	1.60164	20	wild	2.99573	-1.11816	ID.33.1167	ID.33
1167	1.60164	30	wild	3.4012	-1.11816	ID.33.1167	ID.33
1167	1.60164	10	wild	2.30259	-1.11816	ID.33.1167	ID.33
1167	1.60164	360	wild	5.8861	-1.11816	ID.33.1167	ID.33
1167	1.60164	15	wild	2.70805	-1.11816	ID.33.1167	ID.33
1167	1.60164	20	wild	2.99573	-1.11816	ID.33.1167	ID.33
1167	1.60164	120	wild	4.78749	-1.11816	ID.33.1167	ID.33
1167	1.60164	10	wild	2.30259	-1.11816	ID.33.1167	ID.33
1167	1.60164	300	wild	5.70378	-1.11816	ID.33.1167	ID.33
1167	1.60164	540	wild	6.29157	-1.11816	ID.33.1167	ID.33
1167	1.60164	10	wild	2.30259	-1.11816	ID.33.1167	ID.33
1167	1.60164	15	wild	2.70805	-1.11816	ID.33.1167	ID.33
1167	1.60164	30	wild	3.4012	-1.11816	ID.33.1167	ID.33
1167	1.60164	300	wild	5.70378	-1.11816	ID.33.1167	ID.33
1167	1.60164	120	wild	4.78749	-1.11816	ID.33.1167	ID.33
1167	1.60164	10	wild	2.30259	-1.11816	ID.33.1167	ID.33
1167	1.60164	20	wild	2.99573	-1.11816	ID.33.1167	ID.33
1167	1.60164	15	wild	2.70805	-1.11816	ID.33.1167	ID.33
1167	1.60164	30	wild	3.4012	-1.11816	ID.33.1167	ID.33
1167	1.60164	15	wild	2.70805	-1.11816	ID.33.1167	ID.33
1167	1.60164	20	wild	2.99573	-1.11816	ID.33.1167	ID.33
1167	1.60164	15	wild	2.70805	-1.11816	ID.33.1167	ID.33
1167	1.60164	40	wild	3.68888	-1.11816	ID.33.1167	ID.33
1167	1.60164	20	wild	2.99573	-1.11816	ID.33.1167	ID.33
1167	1.60164	180	wild	5.19296	-1.11816	ID.33.1167	ID.33
1167	1.60164	60	wild	4.09434	-1.11816	ID.33.1167	ID.33
1167	1.60164	300	wild	5.70378	-1.11816	ID.33.1167	ID.33
1167	1.60164	90	wild	4.49981	-1.11816	ID.33.1167	ID.33
1167	1.60164	20	wild	2.99573	-1.11816	ID.33.1167	ID.33
1167	1.60164	60	wild	4.09434	-1.11816	ID.33.1167	ID.33
1167	1.60164	180	wild	5.19296	-1.11816	ID.33.1167	ID.33
1167	1.60164	15	wild	2.70805	-1.11816	ID.33.1167	ID.33
1167	1.60164	30	wild	3.4012	-1.11816	ID.33.1167	ID.33
1167	1.60164	120	wild	4.78749	-1.11816	ID.33.1167	ID.33
1167	1.60164	300	wild	5.70378	-1.11816	ID.33.1167	ID.33
1167	1.60164	240	wild	5.48064	-1.11816	ID.33.1167	ID.33
1167	1.60164	45	wild	3.80666	-1.11816	ID.33.1167	ID.33
1167	1.60164	10	wild	2.30259	-1.11816	ID.33.1167	ID.33
1167	1.60164	60	wild	4.09434	-1.11816	ID.33.1167	ID.33
1167	1.60164	360	wild	5.8861	-1.11816	ID.33.1167	ID.33
1167	1.60164	60	wild	4.09434	-1.11816	ID.33.1167	ID.33
1167	1.60164	50	wild	3.91202	-1.11816	ID.33.1167	ID.33
1167	1.60164	300	wild	5.70378	-1.11816	ID.33.1167	ID.33
1167	1.60164	10	wild	2.30259	-1.11816	ID.33.1167	ID.33
1169	1.60438	20	wild	2.99573	-1.1161	ID.33.1169	ID.33
1169	1.60438	150	wild	5.01064	-1.1161	ID.33.1169	ID.33
1169	1.60438	30	wild	3.4012	-1.1161	ID.33.1169	ID.33
1169	1.60438	180	wild	5.19296	-1.1161	ID.33.1169	ID.33
1169	1.60438	30	wild	3.4012	-1.1161	ID.33.1169	ID.33
1169	1.60438	240	wild	5.48064	-1.1161	ID.33.1169	ID.33
1169	1.60438	180	wild	5.19296	-1.1161	ID.33.1169	ID.33
1169	1.60438	20	wild	2.99573	-1.1161	ID.33.1169	ID.33
1169	1.60438	420	wild	6.04025	-1.1161	ID.33.1169	ID.33
1169	1.60438	240	wild	5.48064	-1.1161	ID.33.1169	ID.33
1169	1.60438	240	wild	5.48064	-1.1161	ID.33.1169	ID.33
1169	1.60438	10	wild	2.30259	-1.1161	ID.33.1169	ID.33
1169	1.60438	180	wild	5.19296	-1.1161	ID.33.1169	ID.33
1169	1.60438	10	wild	2.30259	-1.1161	ID.33.1169	ID.33
1169	1.60438	5	wild	1.60944	-1.1161	ID.33.1169	ID.33
1169	1.60438	60	wild	4.09434	-1.1161	ID.33.1169	ID.33
1169	1.60438	10	wild	2.30259	-1.1161	ID.33.1169	ID.33
1169	1.60438	15	wild	2.70805	-1.1161	ID.33.1169	ID.33
1169	1.60438	15	wild	2.70805	-1.1161	ID.33.1169	ID.33
1169	1.60438	20	wild	2.99573	-1.1161	ID.33.1169	ID.33
1169	1.60438	10	wild	2.30259	-1.1161	ID.33.1169	ID.33
1169	1.60438	240	wild	5.48064	-1.1161	ID.33.1169	ID.33
1169	1.60438	5	wild	1.60944	-1.1161	ID.33.1169	ID.33
1169	1.60438	10	wild	2.30259	-1.1161	ID.33.1169	ID.33
1169	1.60438	15	wild	2.70805	-1.1161	ID.33.1169	ID.33
1169	1.60438	60	wild	4.09434	-1.1161	ID.33.1169	ID.33
1169	1.60438	10	wild	2.30259	-1.1161	ID.33.1169	ID.33
1169	1.60438	20	wild	2.99573	-1.1161	ID.33.1169	ID.33
1169	1.60438	15	wild	2.70805	-1.1161	ID.33.1169	ID.33
1169	1.60438	10	wild	2.30259	-1.1161	ID.33.1169	ID.33
1169	1.60438	30	wild	3.4012	-1.1161	ID.33.1169	ID.33
1169	1.60438	120	wild	4.78749	-1.1161	ID.33.1169	ID.33
1169	1.60438	30	wild	3.4012	-1.1161	ID.33.1169	ID.33
1169	1.60438	10	wild	2.30259	-1.1161	ID.33.1169	ID.33
1169	1.60438	90	wild	4.49981	-1.1161	ID.33.1169	ID.33
1169	1.60438	20	wild	2.99573	-1.1161	ID.33.1169	ID.33
1169	1.60438	15	wild	2.70805	-1.1161	ID.33.1169	ID.33
1169	1.60438	120	wild	4.78749	-1.1161	ID.33.1169	ID.33
1169	1.60438	10	wild	2.30259	-1.1161	ID.33.1169	ID.33
1169	1.60438	10	wild	2.30259	-1.1161	ID.33.1169	ID.33
1169	1.60438	30	wild	3.4012	-1.1161	ID.33.1169	ID.33
1169	1.60438	10	wild	2.30259	-1.1161	ID.33.1169	ID.33
1169	1.60438	5	wild	1.60944	-1.1161	ID.33.1169	ID.33
1169	1.60438	15	wild	2.70805	-1.1161	ID.33.1169	ID.33
1169	1.60438	10	wild	2.30259	-1.1161	ID.33.1169	ID.33
1169	1.60438	15	wild	2.70805	-1.1161	ID.33.1169	ID.33
1169	1.60438	20	wild	2.99573	-1.1161	ID.33.1169	ID.33
1169	1.60438	20	wild	2.99573	-1.1161	ID.33.1169	ID.33
1169	1.60438	60	wild	4.09434	-1.1161	ID.33.1169	ID.33
1169	1.60438	30	wild	3.4012	-1.1161	ID.33.1169	ID.33
1169	1.60438	15	wild	2.70805	-1.1161	ID.33.1169	ID.33
1169	1.60438	20	wild	2.99573	-1.1161	ID.33.1169	ID.33
1169	1.60438	180	wild	5.19296	-1.1161	ID.33.1169	ID.33
1169	1.60438	240	wild	5.48064	-1.1161	ID.33.1169	ID.33
1169	1.60438	90	wild	4.49981	-1.1161	ID.33.1169	ID.33
1169	1.60438	10	wild	2.30259	-1.1161	ID.33.1169	ID.33
1169	1.60438	70	wild	4.2485	-1.1161	ID.33.1169	ID.33
1169	1.60438	15	wild	2.70805	-1.1161	ID.33.1169	ID.33
1169	1.60438	10	wild	2.30259	-1.1161	ID.33.1169	ID.33
1169	1.60438	15	wild	2.70805	-1.1161	ID.33.1169	ID.33
1169	1.60438	20	wild	2.99573	-1.1161	ID.33.1169	ID.33
1169	1.60438	10	wild	2.30259	-1.1161	ID.33.1169	ID.33
1169	1.60438	120	wild	4.78749	-1.1161	ID.33.1169	ID.33
1169	1.60438	20	wild	2.99573	-1.1161	ID.33.1169	ID.33
1169	1.60438	30	wild	3.4012	-1.1161	ID.33.1169	ID.33
1169	1.60438	25	wild	3.21888	-1.1161	ID.33.1169	ID.33
1169	1.60438	180	wild	5.19296	-1.1161	ID.33.1169	ID.33
1169	1.60438	60	wild	4.09434	-1.1161	ID.33.1169	ID.33
1169	1.60438	240	wild	5.48064	-1.1161	ID.33.1169	ID.33
1169	1.60438	20	wild	2.99573	-1.1161	ID.33.1169	ID.33
1169	1.60438	10	wild	2.30259	-1.1161	ID.33.1169	ID.33
1169	1.60438	50	wild	3.91202	-1.1161	ID.33.1169	ID.33
1169	1.60438	10	wild	2.30259	-1.1161	ID.33.1169	ID.33
1169	1.60438	15	wild	2.70805	-1.1161	ID.33.1169	ID.33
1169	1.60438	15	wild	2.70805	-1.1161	ID.33.1169	ID.33
1169	1.60438	10	wild	2.30259	-1.1161	ID.33.1169	ID.33
1169	1.60438	40	wild	3.68888	-1.1161	ID.33.1169	ID.33
1169	1.60438	15	wild	2.70805	-1.1161	ID.33.1169	ID.33
1169	1.60438	10	wild	2.30259	-1.1161	ID.33.1169	ID.33
1169	1.60438	180	wild	5.19296	-1.1161	ID.33.1169	ID.33
1169	1.60438	60	wild	4.09434	-1.1161	ID.33.1169	ID.33
1169	1.60438	300	wild	5.70378	-1.1161	ID.33.1169	ID.33
1169	1.60438	180	wild	5.19296	-1.1161	ID.33.1169	ID.33
1169	1.60438	10	wild	2.30259	-1.1161	ID.33.1169	ID.33
1169	1.60438	30	wild	3.4012	-1.1161	ID.33.1169	ID.33
1169	1.60438	30	wild	3.4012	-1.1161	ID.33.1169	ID.33
1169	1.60438	70	wild	4.2485	-1.1161	ID.33.1169	ID.33
1169	1.60438	40	wild	3.68888	-1.1161	ID.33.1169	ID.33
1169	1.60438	60	wild	4.09434	-1.1161	ID.33.1169	ID.33
1169	1.60438	20	wild	2.99573	-1.1161	ID.33.1169	ID.33
1169	1.60438	30	wild	3.4012	-1.1161	ID.33.1169	ID.33
1169	1.60438	40	wild	3.68888	-1.1161	ID.33.1169	ID.33
1169	1.60438	10	wild	2.30259	-1.1161	ID.33.1169	ID.33
1169	1.60438	90	wild	4.49981	-1.1161	ID.33.1169	ID.33
1172	1.60712	60	wild	4.09434	-1.11405	ID.33.1172	ID.33
1172	1.60712	30	wild	3.4012	-1.11405	ID.33.1172	ID.33
1172	1.60712	60	wild	4.09434	-1.11405	ID.33.1172	ID.33
1172	1.60712	420	wild	6.04025	-1.11405	ID.33.1172	ID.33
1172	1.60712	30	wild	3.4012	-1.11405	ID.33.1172	ID.33
1172	1.60712	40	wild	3.68888	-1.11405	ID.33.1172	ID.33
1172	1.60712	15	wild	2.70805	-1.11405	ID.33.1172	ID.33
1172	1.60712	240	wild	5.48064	-1.11405	ID.33.1172	ID.33
1172	1.60712	15	wild	2.70805	-1.11405	ID.33.1172	ID.33
1172	1.60712	300	wild	5.70378	-1.11405	ID.33.1172	ID.33
1172	1.60712	20	wild	2.99573	-1.11405	ID.33.1172	ID.33
1172	1.60712	300	wild	5.70378	-1.11405	ID.33.1172	ID.33
1172	1.60712	15	wild	2.70805	-1.11405	ID.33.1172	ID.33
1172	1.60712	540	wild	6.29157	-1.11405	ID.33.1172	ID.33
1172	1.60712	30	wild	3.4012	-1.11405	ID.33.1172	ID.33
1172	1.60712	10	wild	2.30259	-1.11405	ID.33.1172	ID.33
1172	1.60712	60	wild	4.09434	-1.11405	ID.33.1172	ID.33
1172	1.60712	120	wild	4.78749	-1.11405	ID.33.1172	ID.33
1172	1.60712	180	wild	5.19296	-1.11405	ID.33.1172	ID.33
1172	1.60712	20	wild	2.99573	-1.11405	ID.33.1172	ID.33
1172	1.60712	15	wild	2.70805	-1.11405	ID.33.1172	ID.33
1172	1.60712	30	wild	3.4012	-1.11405	ID.33.1172	ID.33
1172	1.60712	120	wild	4.78749	-1.11405	ID.33.1172	ID.33
1172	1.60712	180	wild	5.19296	-1.11405	ID.33.1172	ID.33
1172	1.60712	50	wild	3.91202	-1.11405	ID.33.1172	ID.33
1172	1.60712	20	wild	2.99573	-1.11405	ID.33.1172	ID.33
1172	1.60712	30	wild	3.4012	-1.11405	ID.33.1172	ID.33
1172	1.60712	30	wild	3.4012	-1.11405	ID.33.1172	ID.33
1172	1.60712	180	wild	5.19296	-1.11405	ID.33.1172	ID.33
1172	1.60712	30	wild	3.4012	-1.11405	ID.33.1172	ID.33
1172	1.60712	20	wild	2.99573	-1.11405	ID.33.1172	ID.33
1172	1.60712	30	wild	3.4012	-1.11405	ID.33.1172	ID.33
1172	1.60712	30	wild	3.4012	-1.11405	ID.33.1172	ID.33
1172	1.60712	120	wild	4.78749	-1.11405	ID.33.1172	ID.33
1172	1.60712	20	wild	2.99573	-1.11405	ID.33.1172	ID.33
1172	1.60712	15	wild	2.70805	-1.11405	ID.33.1172	ID.33
1172	1.60712	10	wild	2.30259	-1.11405	ID.33.1172	ID.33
1172	1.60712	20	wild	2.99573	-1.11405	ID.33.1172	ID.33
1172	1.60712	20	wild	2.99573	-1.11405	ID.33.1172	ID.33
1172	1.60712	120	wild	4.78749	-1.11405	ID.33.1172	ID.33
1172	1.60712	10	wild	2.30259	-1.11405	ID.33.1172	ID.33
1172	1.60712	20	wild	2.99573	-1.11405	ID.33.1172	ID.33
1172	1.60712	15	wild	2.70805	-1.11405	ID.33.1172	ID.33
1172	1.60712	20	wild	2.99573	-1.11405	ID.33.1172	ID.33
1172	1.60712	50	wild	3.91202	-1.11405	ID.33.1172	ID.33
1172	1.60712	10	wild	2.30259	-1.11405	ID.33.1172	ID.33
1172	1.60712	20	wild	2.99573	-1.11405	ID.33.1172	ID.33
1172	1.60712	60	wild	4.09434	-1.11405	ID.33.1172	ID.33
1172	1.60712	60	wild	4.09434	-1.11405	ID.33.1172	ID.33
1172	1.60712	20	wild	2.99573	-1.11405	ID.33.1172	ID.33
1172	1.60712	10	wild	2.30259	-1.11405	ID.33.1172	ID.33
1172	1.60712	60	wild	4.09434	-1.11405	ID.33.1172	ID.33
1172	1.60712	10	wild	2.30259	-1.11405	ID.33.1172	ID.33
1172	1.60712	20	wild	2.99573	-1.11405	ID.33.1172	ID.33
1172	1.60712	240	wild	5.48064	-1.11405	ID.33.1172	ID.33
1172	1.60712	10	wild	2.30259	-1.11405	ID.33.1172	ID.33
1172	1.60712	5	wild	1.60944	-1.11405	ID.33.1172	ID.33
1172	1.60712	5	wild	1.60944	-1.11405	ID.33.1172	ID.33
1172	1.60712	10	wild	2.30259	-1.11405	ID.33.1172	ID.33
1172	1.60712	180	wild	5.19296	-1.11405	ID.33.1172	ID.33
1172	1.60712	90	wild	4.49981	-1.11405	ID.33.1172	ID.33
1172	1.60712	30	wild	3.4012	-1.11405	ID.33.1172	ID.33
1172	1.60712	180	wild	5.19296	-1.11405	ID.33.1172	ID.33
1172	1.60712	30	wild	3.4012	-1.11405	ID.33.1172	ID.33
1172	1.60712	10	wild	2.30259	-1.11405	ID.33.1172	ID.33
1172	1.60712	300	wild	5.70378	-1.11405	ID.33.1172	ID.33
1172	1.60712	10	wild	2.30259	-1.11405	ID.33.1172	ID.33
1172	1.60712	240	wild	5.48064	-1.11405	ID.33.1172	ID.33
1172	1.60712	180	wild	5.19296	-1.11405	ID.33.1172	ID.33
1172	1.60712	30	wild	3.4012	-1.11405	ID.33.1172	ID.33
1172	1.60712	10	wild	2.30259	-1.11405	ID.33.1172	ID.33
1172	1.60712	15	wild	2.70805	-1.11405	ID.33.1172	ID.33
1172	1.60712	10	wild	2.30259	-1.11405	ID.33.1172	ID.33
1172	1.60712	60	wild	4.09434	-1.11405	ID.33.1172	ID.33
1172	1.60712	15	wild	2.70805	-1.11405	ID.33.1172	ID.33
1172	1.60712	180	wild	5.19296	-1.11405	ID.33.1172	ID.33
1172	1.60712	300	wild	5.70378	-1.11405	ID.33.1172	ID.33
1172	1.60712	60	wild	4.09434	-1.11405	ID.33.1172	ID.33
1172	1.60712	180	wild	5.19296	-1.11405	ID.33.1172	ID.33
1172	1.60712	30	wild	3.4012	-1.11405	ID.33.1172	ID.33
1172	1.60712	60	wild	4.09434	-1.11405	ID.33.1172	ID.33
1172	1.60712	10	wild	2.30259	-1.11405	ID.33.1172	ID.33
1172	1.60712	180	wild	5.19296	-1.11405	ID.33.1172	ID.33
1172	1.60712	50	wild	3.91202	-1.11405	ID.33.1172	ID.33
1172	1.60712	15	wild	2.70805	-1.11405	ID.33.1172	ID.33
1172	1.60712	12	wild	2.48491	-1.11405	ID.33.1172	ID.33
1172	1.60712	10	wild	2.30259	-1.11405	ID.33.1172	ID.33
1172	1.60712	10	wild	2.30259	-1.11405	ID.33.1172	ID.33
1172	1.60712	30	wild	3.4012	-1.11405	ID.33.1172	ID.33
1172	1.60712	240	wild	5.48064	-1.11405	ID.33.1172	ID.33
1188	12.7502	45	wild	3.80666	1.37834	ID.39.1188	ID.39
1194	1.36071	30	wild	3.4012	-1.31434	ID.11.1194	ID.11
1194	1.36071	20	wild	2.99573	-1.31434	ID.11.1194	ID.11
1194	1.36071	20	wild	2.99573	-1.31434	ID.11.1194	ID.11
1194	1.36071	10	wild	2.30259	-1.31434	ID.11.1194	ID.11
1194	1.36071	15	wild	2.70805	-1.31434	ID.11.1194	ID.11
1194	1.36071	15	wild	2.70805	-1.31434	ID.11.1194	ID.11
1194	1.36071	30	wild	3.4012	-1.31434	ID.11.1194	ID.11
1194	1.36071	35	wild	3.55535	-1.31434	ID.11.1194	ID.11
1194	1.36071	20	wild	2.99573	-1.31434	ID.11.1194	ID.11
1194	1.36071	60	wild	4.09434	-1.31434	ID.11.1194	ID.11
1194	1.36071	90	wild	4.49981	-1.31434	ID.11.1194	ID.11
1194	1.36071	20	wild	2.99573	-1.31434	ID.11.1194	ID.11
1194	1.36071	20	wild	2.99573	-1.31434	ID.11.1194	ID.11
1194	1.36071	20	wild	2.99573	-1.31434	ID.11.1194	ID.11
1194	1.36071	45	wild	3.80666	-1.31434	ID.11.1194	ID.11
1194	1.36071	20	wild	2.99573	-1.31434	ID.11.1194	ID.11
1194	1.36071	180	wild	5.19296	-1.31434	ID.11.1194	ID.11
1194	1.36071	180	wild	5.19296	-1.31434	ID.11.1194	ID.11
1194	1.36071	20	wild	2.99573	-1.31434	ID.11.1194	ID.11
1194	1.36071	10	wild	2.30259	-1.31434	ID.11.1194	ID.11
1194	1.36071	240	wild	5.48064	-1.31434	ID.11.1194	ID.11
1194	1.36071	30	wild	3.4012	-1.31434	ID.11.1194	ID.11
1194	1.36071	15	wild	2.70805	-1.31434	ID.11.1194	ID.11
1194	1.36071	30	wild	3.4012	-1.31434	ID.11.1194	ID.11
1194	1.36071	20	wild	2.99573	-1.31434	ID.11.1194	ID.11
1194	1.36071	20	wild	2.99573	-1.31434	ID.11.1194	ID.11
1194	1.36071	15	wild	2.70805	-1.31434	ID.11.1194	ID.11
1194	1.36071	90	wild	4.49981	-1.31434	ID.11.1194	ID.11
1194	1.36071	15	wild	2.70805	-1.31434	ID.11.1194	ID.11
1194	1.36071	15	wild	2.70805	-1.31434	ID.11.1194	ID.11
1194	1.36071	20	wild	2.99573	-1.31434	ID.11.1194	ID.11
1194	1.36071	20	wild	2.99573	-1.31434	ID.11.1194	ID.11
1194	1.36071	65	wild	4.17439	-1.31434	ID.11.1194	ID.11
1194	1.36071	20	wild	2.99573	-1.31434	ID.11.1194	ID.11
1194	1.36071	180	wild	5.19296	-1.31434	ID.11.1194	ID.11
1194	1.36071	240	wild	5.48064	-1.31434	ID.11.1194	ID.11
1194	1.36071	30	wild	3.4012	-1.31434	ID.11.1194	ID.11
1194	1.36071	90	wild	4.49981	-1.31434	ID.11.1194	ID.11
1194	1.36071	180	wild	5.19296	-1.31434	ID.11.1194	ID.11
1194	1.36071	30	wild	3.4012	-1.31434	ID.11.1194	ID.11
1194	1.36071	60	wild	4.09434	-1.31434	ID.11.1194	ID.11
1194	1.36071	20	wild	2.99573	-1.31434	ID.11.1194	ID.11
1194	1.36071	180	wild	5.19296	-1.31434	ID.11.1194	ID.11
1194	1.36071	180	wild	5.19296	-1.31434	ID.11.1194	ID.11
1194	1.36071	120	wild	4.78749	-1.31434	ID.11.1194	ID.11
1211	0.91718	20	wild	2.99573	-1.78904	ID.25.1211	ID.25
1211	0.91718	45	wild	3.80666	-1.78904	ID.25.1211	ID.25
1211	0.91718	30	wild	3.4012	-1.78904	ID.25.1211	ID.25
1211	0.91718	30	wild	3.4012	-1.78904	ID.25.1211	ID.25
1211	0.91718	20	wild	2.99573	-1.78904	ID.25.1211	ID.25
1211	0.91718	20	wild	2.99573	-1.78904	ID.25.1211	ID.25
1211	0.91718	60	wild	4.09434	-1.78904	ID.25.1211	ID.25
1211	0.91718	20	wild	2.99573	-1.78904	ID.25.1211	ID.25
1211	0.91718	40	wild	3.68888	-1.78904	ID.25.1211	ID.25
1211	0.91718	20	wild	2.99573	-1.78904	ID.25.1211	ID.25
1211	0.91718	10	wild	2.30259	-1.78904	ID.25.1211	ID.25
1211	0.91718	20	wild	2.99573	-1.78904	ID.25.1211	ID.25
1211	0.91718	30	wild	3.4012	-1.78904	ID.25.1211	ID.25
1211	0.91718	15	wild	2.70805	-1.78904	ID.25.1211	ID.25
1211	0.91718	30	wild	3.4012	-1.78904	ID.25.1211	ID.25
1211	0.91718	30	wild	3.4012	-1.78904	ID.25.1211	ID.25
1211	0.91718	20	wild	2.99573	-1.78904	ID.25.1211	ID.25
1211	0.91718	30	wild	3.4012	-1.78904	ID.25.1211	ID.25
1211	0.91718	60	wild	4.09434	-1.78904	ID.25.1211	ID.25
1211	0.91718	15	wild	2.70805	-1.78904	ID.25.1211	ID.25
1211	0.91718	60	wild	4.09434	-1.78904	ID.25.1211	ID.25
1211	0.91718	60	wild	4.09434	-1.78904	ID.25.1211	ID.25
1211	0.91718	20	wild	2.99573	-1.78904	ID.25.1211	ID.25
1211	0.91718	30	wild	3.4012	-1.78904	ID.25.1211	ID.25
1211	0.91718	40	wild	3.68888	-1.78904	ID.25.1211	ID.25
1211	0.91718	40	wild	3.68888	-1.78904	ID.25.1211	ID.25
1211	0.91718	60	wild	4.09434	-1.78904	ID.25.1211	ID.25
1211	0.91718	20	wild	2.99573	-1.78904	ID.25.1211	ID.25
1211	0.91718	40	wild	3.68888	-1.78904	ID.25.1211	ID.25
1211	0.91718	60	wild	4.09434	-1.78904	ID.25.1211	ID.25
1211	0.91718	10	wild	2.30259	-1.78904	ID.25.1211	ID.25
1211	0.91718	90	wild	4.49981	-1.78904	ID.25.1211	ID.25
1211	0.91718	20	wild	2.99573	-1.78904	ID.25.1211	ID.25
1211	0.91718	10	wild	2.30259	-1.78904	ID.25.1211	ID.25
1211	0.91718	20	wild	2.99573	-1.78904	ID.25.1211	ID.25
1211	0.91718	30	wild	3.4012	-1.78904	ID.25.1211	ID.25
1211	0.91718	15	wild	2.70805	-1.78904	ID.25.1211	ID.25
1211	0.91718	20	wild	2.99573	-1.78904	ID.25.1211	ID.25
1211	0.91718	15	wild	2.70805	-1.78904	ID.25.1211	ID.25
1211	0.91718	10	wild	2.30259	-1.78904	ID.25.1211	ID.25
1211	0.91718	20	wild	2.99573	-1.78904	ID.25.1211	ID.25
1211	0.91718	10	wild	2.30259	-1.78904	ID.25.1211	ID.25
1211	0.91718	30	wild	3.4012	-1.78904	ID.25.1211	ID.25
1211	0.91718	15	wild	2.70805	-1.78904	ID.25.1211	ID.25
1211	0.91718	10	wild	2.30259	-1.78904	ID.25.1211	ID.25
1211	0.91718	30	wild	3.4012	-1.78904	ID.25.1211	ID.25
1211	0.91718	30	wild	3.4012	-1.78904	ID.25.1211	ID.25
1211	0.91718	10	wild	2.30259	-1.78904	ID.25.1211	ID.25
1211	0.91718	10	wild	2.30259	-1.78904	ID.25.1211	ID.25
1211	0.91718	15	wild	2.70805	-1.78904	ID.25.1211	ID.25
1211	0.91718	15	wild	2.70805	-1.78904	ID.25.1211	ID.25
1211	0.91718	60	wild	4.09434	-1.78904	ID.25.1211	ID.25
1211	0.91718	60	wild	4.09434	-1.78904	ID.25.1211	ID.25
1211	0.91718	60	wild	4.09434	-1.78904	ID.25.1211	ID.25
1211	0.91718	60	wild	4.09434	-1.78904	ID.25.1211	ID.25
1211	0.91718	15	wild	2.70805	-1.78904	ID.25.1211	ID.25
1211	0.91718	20	wild	2.99573	-1.78904	ID.25.1211	ID.25
1211	0.91718	20	wild	2.99573	-1.78904	ID.25.1211	ID.25
1211	0.91718	45	wild	3.80666	-1.78904	ID.25.1211	ID.25
1211	0.91718	45	wild	3.80666	-1.78904	ID.25.1211	ID.25
1211	0.91718	20	wild	2.99573	-1.78904	ID.25.1211	ID.25
1211	0.91718	20	wild	2.99573	-1.78904	ID.25.1211	ID.25
1211	0.91718	20	wild	2.99573	-1.78904	ID.25.1211	ID.25
1211	0.91718	20	wild	2.99573	-1.78904	ID.25.1211	ID.25
1211	0.91718	15	wild	2.70805	-1.78904	ID.25.1211	ID.25
1211	0.91718	20	wild	2.99573	-1.78904	ID.25.1211	ID.25
1211	0.91718	20	wild	2.99573	-1.78904	ID.25.1211	ID.25
1211	0.91718	60	wild	4.09434	-1.78904	ID.25.1211	ID.25
1211	0.91718	60	wild	4.09434	-1.78904	ID.25.1211	ID.25
1211	0.91718	30	wild	3.4012	-1.78904	ID.25.1211	ID.25
1211	0.91718	30	wild	3.4012	-1.78904	ID.25.1211	ID.25
1211	0.91718	20	wild	2.99573	-1.78904	ID.25.1211	ID.25
1211	0.91718	20	wild	2.99573	-1.78904	ID.25.1211	ID.25
1211	0.91718	40	wild	3.68888	-1.78904	ID.25.1211	ID.25
1211	0.91718	20	wild	2.99573	-1.78904	ID.25.1211	ID.25
1211	0.91718	90	wild	4.49981	-1.78904	ID.25.1211	ID.25
1211	0.91718	90	wild	4.49981	-1.78904	ID.25.1211	ID.25
1211	0.91718	90	wild	4.49981	-1.78904	ID.25.1211	ID.25
1211	0.91718	90	wild	4.49981	-1.78904	ID.25.1211	ID.25
1211	0.91718	20	wild	2.99573	-1.78904	ID.25.1211	ID.25
1211	0.91718	20	wild	2.99573	-1.78904	ID.25.1211	ID.25
1211	0.91718	30	wild	3.4012	-1.78904	ID.25.1211	ID.25
1211	0.91718	60	wild	4.09434	-1.78904	ID.25.1211	ID.25
1211	0.91718	20	wild	2.99573	-1.78904	ID.25.1211	ID.25
1211	0.91718	20	wild	2.99573	-1.78904	ID.25.1211	ID.25
1211	0.91718	15	wild	2.70805	-1.78904	ID.25.1211	ID.25
1211	0.91718	15	wild	2.70805	-1.78904	ID.25.1211	ID.25
1211	0.91718	15	wild	2.70805	-1.78904	ID.25.1211	ID.25
1213	0.919918	15	wild	2.70805	-1.78545	ID.25.1213	ID.25
1213	0.919918	20	wild	2.99573	-1.78545	ID.25.1213	ID.25
1213	0.919918	30	wild	3.4012	-1.78545	ID.25.1213	ID.25
1213	0.919918	5	wild	1.60944	-1.78545	ID.25.1213	ID.25
1213	0.919918	15	wild	2.70805	-1.78545	ID.25.1213	ID.25
1213	0.919918	20	wild	2.99573	-1.78545	ID.25.1213	ID.25
1213	0.919918	240	wild	5.48064	-1.78545	ID.25.1213	ID.25
1213	0.919918	15	wild	2.70805	-1.78545	ID.25.1213	ID.25
1213	0.919918	15	wild	2.70805	-1.78545	ID.25.1213	ID.25
1213	0.919918	20	wild	2.99573	-1.78545	ID.25.1213	ID.25
1213	0.919918	30	wild	3.4012	-1.78545	ID.25.1213	ID.25
1213	0.919918	25	wild	3.21888	-1.78545	ID.25.1213	ID.25
1213	0.919918	15	wild	2.70805	-1.78545	ID.25.1213	ID.25
1213	0.919918	10	wild	2.30259	-1.78545	ID.25.1213	ID.25
1213	0.919918	300	wild	5.70378	-1.78545	ID.25.1213	ID.25
1213	0.919918	90	wild	4.49981	-1.78545	ID.25.1213	ID.25
1213	0.919918	20	wild	2.99573	-1.78545	ID.25.1213	ID.25
1213	0.919918	25	wild	3.21888	-1.78545	ID.25.1213	ID.25
1213	0.919918	10	wild	2.30259	-1.78545	ID.25.1213	ID.25
1213	0.919918	45	wild	3.80666	-1.78545	ID.25.1213	ID.25
1213	0.919918	30	wild	3.4012	-1.78545	ID.25.1213	ID.25
1213	0.919918	20	wild	2.99573	-1.78545	ID.25.1213	ID.25
1213	0.919918	60	wild	4.09434	-1.78545	ID.25.1213	ID.25
1213	0.919918	30	wild	3.4012	-1.78545	ID.25.1213	ID.25
1213	0.919918	120	wild	4.78749	-1.78545	ID.25.1213	ID.25
1213	0.919918	90	wild	4.49981	-1.78545	ID.25.1213	ID.25
1213	0.919918	60	wild	4.09434	-1.78545	ID.25.1213	ID.25
1213	0.919918	40	wild	3.68888	-1.78545	ID.25.1213	ID.25
1213	0.919918	30	wild	3.4012	-1.78545	ID.25.1213	ID.25
1213	0.919918	12	wild	2.48491	-1.78545	ID.25.1213	ID.25
1213	0.919918	10	wild	2.30259	-1.78545	ID.25.1213	ID.25
1213	0.919918	90	wild	4.49981	-1.78545	ID.25.1213	ID.25
1213	0.919918	10	wild	2.30259	-1.78545	ID.25.1213	ID.25
1213	0.919918	90	wild	4.49981	-1.78545	ID.25.1213	ID.25
1213	0.919918	30	wild	3.4012	-1.78545	ID.25.1213	ID.25
1213	0.919918	20	wild	2.99573	-1.78545	ID.25.1213	ID.25
1213	0.919918	20	wild	2.99573	-1.78545	ID.25.1213	ID.25
1213	0.919918	40	wild	3.68888	-1.78545	ID.25.1213	ID.25
1213	0.919918	60	wild	4.09434	-1.78545	ID.25.1213	ID.25
1213	0.919918	240	wild	5.48064	-1.78545	ID.25.1213	ID.25
1213	0.919918	20	wild	2.99573	-1.78545	ID.25.1213	ID.25
1213	0.919918	120	wild	4.78749	-1.78545	ID.25.1213	ID.25
1213	0.919918	120	wild	4.78749	-1.78545	ID.25.1213	ID.25
1213	0.919918	20	wild	2.99573	-1.78545	ID.25.1213	ID.25
1213	0.919918	40	wild	3.68888	-1.78545	ID.25.1213	ID.25
1213	0.919918	40	wild	3.68888	-1.78545	ID.25.1213	ID.25
1213	0.919918	180	wild	5.19296	-1.78545	ID.25.1213	ID.25
1213	0.919918	10	wild	2.30259	-1.78545	ID.25.1213	ID.25
1213	0.919918	20	wild	2.99573	-1.78545	ID.25.1213	ID.25
1213	0.919918	240	wild	5.48064	-1.78545	ID.25.1213	ID.25
1213	0.919918	30	wild	3.4012	-1.78545	ID.25.1213	ID.25
1213	0.919918	90	wild	4.49981	-1.78545	ID.25.1213	ID.25
1213	0.919918	240	wild	5.48064	-1.78545	ID.25.1213	ID.25
1213	0.919918	10	wild	2.30259	-1.78545	ID.25.1213	ID.25
1213	0.919918	2	wild	0.693147	-1.78545	ID.25.1213	ID.25
1213	0.919918	45	wild	3.80666	-1.78545	ID.25.1213	ID.25
1213	0.919918	20	wild	2.99573	-1.78545	ID.25.1213	ID.25
1213	0.919918	180	wild	5.19296	-1.78545	ID.25.1213	ID.25
1213	0.919918	30	wild	3.4012	-1.78545	ID.25.1213	ID.25
1213	0.919918	260	wild	5.56068	-1.78545	ID.25.1213	ID.25
1213	0.919918	60	wild	4.09434	-1.78545	ID.25.1213	ID.25
1213	0.919918	20	wild	2.99573	-1.78545	ID.25.1213	ID.25
1213	0.919918	90	wild	4.49981	-1.78545	ID.25.1213	ID.25
1213	0.919918	90	wild	4.49981	-1.78545	ID.25.1213	ID.25
1213	0.919918	30	wild	3.4012	-1.78545	ID.25.1213	ID.25
1213	0.919918	10	wild	2.30259	-1.78545	ID.25.1213	ID.25
1213	0.919918	20	wild	2.99573	-1.78545	ID.25.1213	ID.25
1213	0.919918	20	wild	2.99573	-1.78545	ID.25.1213	ID.25
1213	0.919918	10	wild	2.30259	-1.78545	ID.25.1213	ID.25
1213	0.919918	20	wild	2.99573	-1.78545	ID.25.1213	ID.25
1213	0.919918	10	wild	2.30259	-1.78545	ID.25.1213	ID.25
1213	0.919918	120	wild	4.78749	-1.78545	ID.25.1213	ID.25
1213	0.919918	45	wild	3.80666	-1.78545	ID.25.1213	ID.25
1213	0.919918	180	wild	5.19296	-1.78545	ID.25.1213	ID.25
1213	0.919918	15	wild	2.70805	-1.78545	ID.25.1213	ID.25
1213	0.919918	14	wild	2.63906	-1.78545	ID.25.1213	ID.25
1213	0.919918	15	wild	2.70805	-1.78545	ID.25.1213	ID.25
1213	0.919918	20	wild	2.99573	-1.78545	ID.25.1213	ID.25
1213	0.919918	720	wild	6.57925	-1.78545	ID.25.1213	ID.25
1213	0.919918	90	wild	4.49981	-1.78545	ID.25.1213	ID.25
1213	0.919918	15	wild	2.70805	-1.78545	ID.25.1213	ID.25
1213	0.919918	240	wild	5.48064	-1.78545	ID.25.1213	ID.25
1213	0.919918	260	wild	5.56068	-1.78545	ID.25.1213	ID.25
1217	0.925394	15	wild	2.70805	-1.77831	ID.25.1217	ID.25
1217	0.925394	30	wild	3.4012	-1.77831	ID.25.1217	ID.25
1217	0.925394	30	wild	3.4012	-1.77831	ID.25.1217	ID.25
1217	0.925394	180	wild	5.19296	-1.77831	ID.25.1217	ID.25
1217	0.925394	20	wild	2.99573	-1.77831	ID.25.1217	ID.25
1217	0.925394	15	wild	2.70805	-1.77831	ID.25.1217	ID.25
1217	0.925394	60	wild	4.09434	-1.77831	ID.25.1217	ID.25
1217	0.925394	60	wild	4.09434	-1.77831	ID.25.1217	ID.25
1217	0.925394	10	wild	2.30259	-1.77831	ID.25.1217	ID.25
1217	0.925394	30	wild	3.4012	-1.77831	ID.25.1217	ID.25
1217	0.925394	90	wild	4.49981	-1.77831	ID.25.1217	ID.25
1217	0.925394	30	wild	3.4012	-1.77831	ID.25.1217	ID.25
1217	0.925394	15	wild	2.70805	-1.77831	ID.25.1217	ID.25
1217	0.925394	25	wild	3.21888	-1.77831	ID.25.1217	ID.25
1217	0.925394	30	wild	3.4012	-1.77831	ID.25.1217	ID.25
1217	0.925394	20	wild	2.99573	-1.77831	ID.25.1217	ID.25
1217	0.925394	20	wild	2.99573	-1.77831	ID.25.1217	ID.25
1217	0.925394	90	wild	4.49981	-1.77831	ID.25.1217	ID.25
1217	0.925394	20	wild	2.99573	-1.77831	ID.25.1217	ID.25
1217	0.925394	60	wild	4.09434	-1.77831	ID.25.1217	ID.25
1217	0.925394	90	wild	4.49981	-1.77831	ID.25.1217	ID.25
1217	0.925394	15	wild	2.70805	-1.77831	ID.25.1217	ID.25
1217	0.925394	15	wild	2.70805	-1.77831	ID.25.1217	ID.25
1217	0.925394	60	wild	4.09434	-1.77831	ID.25.1217	ID.25
1217	0.925394	20	wild	2.99573	-1.77831	ID.25.1217	ID.25
1217	0.925394	20	wild	2.99573	-1.77831	ID.25.1217	ID.25
1217	0.925394	10	wild	2.30259	-1.77831	ID.25.1217	ID.25
1217	0.925394	180	wild	5.19296	-1.77831	ID.25.1217	ID.25
1217	0.925394	90	wild	4.49981	-1.77831	ID.25.1217	ID.25
1217	0.925394	60	wild	4.09434	-1.77831	ID.25.1217	ID.25
1217	0.925394	20	wild	2.99573	-1.77831	ID.25.1217	ID.25
1217	0.925394	15	wild	2.70805	-1.77831	ID.25.1217	ID.25
1217	0.925394	30	wild	3.4012	-1.77831	ID.25.1217	ID.25
1217	0.925394	30	wild	3.4012	-1.77831	ID.25.1217	ID.25
1217	0.925394	20	wild	2.99573	-1.77831	ID.25.1217	ID.25
1217	0.925394	30	wild	3.4012	-1.77831	ID.25.1217	ID.25
1217	0.925394	15	wild	2.70805	-1.77831	ID.25.1217	ID.25
1217	0.925394	60	wild	4.09434	-1.77831	ID.25.1217	ID.25
1217	0.925394	15	wild	2.70805	-1.77831	ID.25.1217	ID.25
1217	0.925394	40	wild	3.68888	-1.77831	ID.25.1217	ID.25
1217	0.925394	90	wild	4.49981	-1.77831	ID.25.1217	ID.25
1217	0.925394	20	wild	2.99573	-1.77831	ID.25.1217	ID.25
1217	0.925394	60	wild	4.09434	-1.77831	ID.25.1217	ID.25
1217	0.925394	2	wild	0.693147	-1.77831	ID.25.1217	ID.25
1217	0.925394	20	wild	2.99573	-1.77831	ID.25.1217	ID.25
1217	0.925394	15	wild	2.70805	-1.77831	ID.25.1217	ID.25
1217	0.925394	30	wild	3.4012	-1.77831	ID.25.1217	ID.25
1217	0.925394	40	wild	3.68888	-1.77831	ID.25.1217	ID.25
1217	0.925394	15	wild	2.70805	-1.77831	ID.25.1217	ID.25
1217	0.925394	30	wild	3.4012	-1.77831	ID.25.1217	ID.25
1217	0.925394	20	wild	2.99573	-1.77831	ID.25.1217	ID.25
1217	0.925394	20	wild	2.99573	-1.77831	ID.25.1217	ID.25
1217	0.925394	30	wild	3.4012	-1.77831	ID.25.1217	ID.25
1217	0.925394	45	wild	3.80666	-1.77831	ID.25.1217	ID.25
1217	0.925394	60	wild	4.09434	-1.77831	ID.25.1217	ID.25
1217	0.925394	20	wild	2.99573	-1.77831	ID.25.1217	ID.25
1217	0.925394	10	wild	2.30259	-1.77831	ID.25.1217	ID.25
1217	0.925394	30	wild	3.4012	-1.77831	ID.25.1217	ID.25
1217	0.925394	60	wild	4.09434	-1.77831	ID.25.1217	ID.25
1217	0.925394	20	wild	2.99573	-1.77831	ID.25.1217	ID.25
1217	0.925394	40	wild	3.68888	-1.77831	ID.25.1217	ID.25
1217	0.925394	30	wild	3.4012	-1.77831	ID.25.1217	ID.25
1217	0.925394	40	wild	3.68888	-1.77831	ID.25.1217	ID.25
1217	0.925394	25	wild	3.21888	-1.77831	ID.25.1217	ID.25
1217	0.925394	115	wild	4.74493	-1.77831	ID.25.1217	ID.25
1217	0.925394	30	wild	3.4012	-1.77831	ID.25.1217	ID.25
1217	0.925394	10	wild	2.30259	-1.77831	ID.25.1217	ID.25
1217	0.925394	10	wild	2.30259	-1.77831	ID.25.1217	ID.25
1217	0.925394	10	wild	2.30259	-1.77831	ID.25.1217	ID.25
1217	0.925394	20	wild	2.99573	-1.77831	ID.25.1217	ID.25
1217	0.925394	10	wild	2.30259	-1.77831	ID.25.1217	ID.25
1217	0.925394	20	wild	2.99573	-1.77831	ID.25.1217	ID.25
1217	0.925394	10	wild	2.30259	-1.77831	ID.25.1217	ID.25
1217	0.925394	15	wild	2.70805	-1.77831	ID.25.1217	ID.25
1217	0.925394	10	wild	2.30259	-1.77831	ID.25.1217	ID.25
1217	0.925394	60	wild	4.09434	-1.77831	ID.25.1217	ID.25
1217	0.925394	40	wild	3.68888	-1.77831	ID.25.1217	ID.25
1217	0.925394	60	wild	4.09434	-1.77831	ID.25.1217	ID.25
1217	0.925394	30	wild	3.4012	-1.77831	ID.25.1217	ID.25
1217	0.925394	10	wild	2.30259	-1.77831	ID.25.1217	ID.25
1217	0.925394	15	wild	2.70805	-1.77831	ID.25.1217	ID.25
1217	0.925394	15	wild	2.70805	-1.77831	ID.25.1217	ID.25
1217	0.925394	15	wild	2.70805	-1.77831	ID.25.1217	ID.25
1217	0.925394	20	wild	2.99573	-1.77831	ID.25.1217	ID.25
1217	0.925394	20	wild	2.99573	-1.77831	ID.25.1217	ID.25
1217	0.925394	20	wild	2.99573	-1.77831	ID.25.1217	ID.25
1217	0.925394	15	wild	2.70805	-1.77831	ID.25.1217	ID.25
1217	0.925394	15	wild	2.70805	-1.77831	ID.25.1217	ID.25
1217	0.925394	15	wild	2.70805	-1.77831	ID.25.1217	ID.25
1219	0.928131	40	wild	3.68888	-1.77475	ID.25.1219	ID.25
1219	0.928131	20	wild	2.99573	-1.77475	ID.25.1219	ID.25
1219	0.928131	60	wild	4.09434	-1.77475	ID.25.1219	ID.25
1219	0.928131	30	wild	3.4012	-1.77475	ID.25.1219	ID.25
1219	0.928131	25	wild	3.21888	-1.77475	ID.25.1219	ID.25
1219	0.928131	25	wild	3.21888	-1.77475	ID.25.1219	ID.25
1219	0.928131	15	wild	2.70805	-1.77475	ID.25.1219	ID.25
1219	0.928131	20	wild	2.99573	-1.77475	ID.25.1219	ID.25
1219	0.928131	12	wild	2.48491	-1.77475	ID.25.1219	ID.25
1219	0.928131	60	wild	4.09434	-1.77475	ID.25.1219	ID.25
1219	0.928131	20	wild	2.99573	-1.77475	ID.25.1219	ID.25
1219	0.928131	20	wild	2.99573	-1.77475	ID.25.1219	ID.25
1219	0.928131	30	wild	3.4012	-1.77475	ID.25.1219	ID.25
1219	0.928131	20	wild	2.99573	-1.77475	ID.25.1219	ID.25
1219	0.928131	20	wild	2.99573	-1.77475	ID.25.1219	ID.25
1219	0.928131	40	wild	3.68888	-1.77475	ID.25.1219	ID.25
1219	0.928131	10	wild	2.30259	-1.77475	ID.25.1219	ID.25
1219	0.928131	30	wild	3.4012	-1.77475	ID.25.1219	ID.25
1219	0.928131	15	wild	2.70805	-1.77475	ID.25.1219	ID.25
1219	0.928131	120	wild	4.78749	-1.77475	ID.25.1219	ID.25
1219	0.928131	12	wild	2.48491	-1.77475	ID.25.1219	ID.25
1219	0.928131	40	wild	3.68888	-1.77475	ID.25.1219	ID.25
1219	0.928131	20	wild	2.99573	-1.77475	ID.25.1219	ID.25
1219	0.928131	15	wild	2.70805	-1.77475	ID.25.1219	ID.25
1219	0.928131	30	wild	3.4012	-1.77475	ID.25.1219	ID.25
1219	0.928131	30	wild	3.4012	-1.77475	ID.25.1219	ID.25
1219	0.928131	30	wild	3.4012	-1.77475	ID.25.1219	ID.25
1219	0.928131	20	wild	2.99573	-1.77475	ID.25.1219	ID.25
1219	0.928131	30	wild	3.4012	-1.77475	ID.25.1219	ID.25
1219	0.928131	10	wild	2.30259	-1.77475	ID.25.1219	ID.25
1219	0.928131	40	wild	3.68888	-1.77475	ID.25.1219	ID.25
1219	0.928131	20	wild	2.99573	-1.77475	ID.25.1219	ID.25
1219	0.928131	15	wild	2.70805	-1.77475	ID.25.1219	ID.25
1219	0.928131	20	wild	2.99573	-1.77475	ID.25.1219	ID.25
1219	0.928131	20	wild	2.99573	-1.77475	ID.25.1219	ID.25
1219	0.928131	30	wild	3.4012	-1.77475	ID.25.1219	ID.25
1219	0.928131	30	wild	3.4012	-1.77475	ID.25.1219	ID.25
1219	0.928131	30	wild	3.4012	-1.77475	ID.25.1219	ID.25
1219	0.928131	30	wild	3.4012	-1.77475	ID.25.1219	ID.25
1219	0.928131	60	wild	4.09434	-1.77475	ID.25.1219	ID.25
1219	0.928131	30	wild	3.4012	-1.77475	ID.25.1219	ID.25
1219	0.928131	30	wild	3.4012	-1.77475	ID.25.1219	ID.25
1219	0.928131	15	wild	2.70805	-1.77475	ID.25.1219	ID.25
1219	0.928131	60	wild	4.09434	-1.77475	ID.25.1219	ID.25
1219	0.928131	15	wild	2.70805	-1.77475	ID.25.1219	ID.25
1219	0.928131	180	wild	5.19296	-1.77475	ID.25.1219	ID.25
1219	0.928131	20	wild	2.99573	-1.77475	ID.25.1219	ID.25
1219	0.928131	20	wild	2.99573	-1.77475	ID.25.1219	ID.25
1219	0.928131	20	wild	2.99573	-1.77475	ID.25.1219	ID.25
1219	0.928131	30	wild	3.4012	-1.77475	ID.25.1219	ID.25
1219	0.928131	60	wild	4.09434	-1.77475	ID.25.1219	ID.25
1219	0.928131	30	wild	3.4012	-1.77475	ID.25.1219	ID.25
1219	0.928131	40	wild	3.68888	-1.77475	ID.25.1219	ID.25
1219	0.928131	10	wild	2.30259	-1.77475	ID.25.1219	ID.25
1219	0.928131	20	wild	2.99573	-1.77475	ID.25.1219	ID.25
1219	0.928131	25	wild	3.21888	-1.77475	ID.25.1219	ID.25
1219	0.928131	5	wild	1.60944	-1.77475	ID.25.1219	ID.25
1219	0.928131	15	wild	2.70805	-1.77475	ID.25.1219	ID.25
1219	0.928131	60	wild	4.09434	-1.77475	ID.25.1219	ID.25
1219	0.928131	20	wild	2.99573	-1.77475	ID.25.1219	ID.25
1219	0.928131	45	wild	3.80666	-1.77475	ID.25.1219	ID.25
1219	0.928131	15	wild	2.70805	-1.77475	ID.25.1219	ID.25
1219	0.928131	30	wild	3.4012	-1.77475	ID.25.1219	ID.25
1219	0.928131	45	wild	3.80666	-1.77475	ID.25.1219	ID.25
1219	0.928131	45	wild	3.80666	-1.77475	ID.25.1219	ID.25
1219	0.928131	20	wild	2.99573	-1.77475	ID.25.1219	ID.25
1219	0.928131	10	wild	2.30259	-1.77475	ID.25.1219	ID.25
1219	0.928131	20	wild	2.99573	-1.77475	ID.25.1219	ID.25
1219	0.928131	10	wild	2.30259	-1.77475	ID.25.1219	ID.25
1219	0.928131	180	wild	5.19296	-1.77475	ID.25.1219	ID.25
1219	0.928131	40	wild	3.68888	-1.77475	ID.25.1219	ID.25
1219	0.928131	15	wild	2.70805	-1.77475	ID.25.1219	ID.25
1219	0.928131	25	wild	3.21888	-1.77475	ID.25.1219	ID.25
1219	0.928131	30	wild	3.4012	-1.77475	ID.25.1219	ID.25
1219	0.928131	15	wild	2.70805	-1.77475	ID.25.1219	ID.25
1219	0.928131	60	wild	4.09434	-1.77475	ID.25.1219	ID.25
1219	0.928131	240	wild	5.48064	-1.77475	ID.25.1219	ID.25
1219	0.928131	20	wild	2.99573	-1.77475	ID.25.1219	ID.25
1219	0.928131	10	wild	2.30259	-1.77475	ID.25.1219	ID.25
1219	0.928131	10	wild	2.30259	-1.77475	ID.25.1219	ID.25
1219	0.928131	30	wild	3.4012	-1.77475	ID.25.1219	ID.25
1219	0.928131	60	wild	4.09434	-1.77475	ID.25.1219	ID.25
1219	0.928131	90	wild	4.49981	-1.77475	ID.25.1219	ID.25
1219	0.928131	90	wild	4.49981	-1.77475	ID.25.1219	ID.25
1219	0.928131	20	wild	2.99573	-1.77475	ID.25.1219	ID.25
1219	0.928131	30	wild	3.4012	-1.77475	ID.25.1219	ID.25
1219	0.928131	180	wild	5.19296	-1.77475	ID.25.1219	ID.25
1219	0.928131	90	wild	4.49981	-1.77475	ID.25.1219	ID.25
1219	0.928131	30	wild	3.4012	-1.77475	ID.25.1219	ID.25
1051	2.91855	30	wild	3.4012	-0.396042	ID.41.1051	ID.41
1051	2.91855	10	wild	2.30259	-0.396042	ID.41.1051	ID.41
1051	2.91855	45	wild	3.80666	-0.396042	ID.41.1051	ID.41
1051	2.91855	360	wild	5.8861	-0.396042	ID.41.1051	ID.41
1051	2.91855	15	wild	2.70805	-0.396042	ID.41.1051	ID.41
1256	3.55921	45	wild	3.80666	-0.157224	ID.41.1256	ID.41
1256	3.55921	10	wild	2.30259	-0.157224	ID.41.1256	ID.41
1256	3.55921	10	wild	2.30259	-0.157224	ID.41.1256	ID.41
1256	3.55921	35	wild	3.55535	-0.157224	ID.41.1256	ID.41
1256	3.55921	20	wild	2.99573	-0.157224	ID.41.1256	ID.41
1256	3.55921	40	wild	3.68888	-0.157224	ID.41.1256	ID.41
1256	3.55921	15	wild	2.70805	-0.157224	ID.41.1256	ID.41
1256	3.55921	10	wild	2.30259	-0.157224	ID.41.1256	ID.41
1256	3.55921	20	wild	2.99573	-0.157224	ID.41.1256	ID.41
1256	3.55921	240	wild	5.48064	-0.157224	ID.41.1256	ID.41
1256	3.55921	40	wild	3.68888	-0.157224	ID.41.1256	ID.41
1256	3.55921	15	wild	2.70805	-0.157224	ID.41.1256	ID.41
1256	3.55921	15	wild	2.70805	-0.157224	ID.41.1256	ID.41
1256	3.55921	20	wild	2.99573	-0.157224	ID.41.1256	ID.41
1256	3.55921	30	wild	3.4012	-0.157224	ID.41.1256	ID.41
1256	3.55921	30	wild	3.4012	-0.157224	ID.41.1256	ID.41
1256	3.55921	60	wild	4.09434	-0.157224	ID.41.1256	ID.41
1256	3.55921	120	wild	4.78749	-0.157224	ID.41.1256	ID.41
1256	3.55921	1	wild	0	-0.157224	ID.41.1256	ID.41
1256	3.55921	20	wild	2.99573	-0.157224	ID.41.1256	ID.41
1256	3.55921	10	wild	2.30259	-0.157224	ID.41.1256	ID.41
1256	3.55921	120	wild	4.78749	-0.157224	ID.41.1256	ID.41
1256	3.55921	240	wild	5.48064	-0.157224	ID.41.1256	ID.41
1256	3.55921	20	wild	2.99573	-0.157224	ID.41.1256	ID.41
1256	3.55921	25	wild	3.21888	-0.157224	ID.41.1256	ID.41
1256	3.55921	15	wild	2.70805	-0.157224	ID.41.1256	ID.41
1256	3.55921	15	wild	2.70805	-0.157224	ID.41.1256	ID.41
1256	3.55921	15	wild	2.70805	-0.157224	ID.41.1256	ID.41
1256	3.55921	60	wild	4.09434	-0.157224	ID.41.1256	ID.41
1256	3.55921	20	wild	2.99573	-0.157224	ID.41.1256	ID.41
1290	3.62218	10	wild	2.30259	-0.136119	ID.41.1290	ID.41
1290	3.62218	15	wild	2.70805	-0.136119	ID.41.1290	ID.41
1290	3.62218	10	wild	2.30259	-0.136119	ID.41.1290	ID.41
1290	3.62218	20	wild	2.99573	-0.136119	ID.41.1290	ID.41
1290	3.62218	20	wild	2.99573	-0.136119	ID.41.1290	ID.41
1290	3.62218	5	wild	1.60944	-0.136119	ID.41.1290	ID.41
1290	3.62218	15	wild	2.70805	-0.136119	ID.41.1290	ID.41
1290	3.62218	30	wild	3.4012	-0.136119	ID.41.1290	ID.41
1290	3.62218	20	wild	2.99573	-0.136119	ID.41.1290	ID.41
1290	3.62218	60	wild	4.09434	-0.136119	ID.41.1290	ID.41
1290	3.62218	30	wild	3.4012	-0.136119	ID.41.1290	ID.41
1290	3.62218	60	wild	4.09434	-0.136119	ID.41.1290	ID.41
1290	3.62218	10	wild	2.30259	-0.136119	ID.41.1290	ID.41
1290	3.62218	10	wild	2.30259	-0.136119	ID.41.1290	ID.41
1290	3.62218	30	wild	3.4012	-0.136119	ID.41.1290	ID.41
1290	3.62218	20	wild	2.99573	-0.136119	ID.41.1290	ID.41
1290	3.62218	20	wild	2.99573	-0.136119	ID.41.1290	ID.41
1290	3.62218	20	wild	2.99573	-0.136119	ID.41.1290	ID.41
1290	3.62218	25	wild	3.21888	-0.136119	ID.41.1290	ID.41
1290	3.62218	90	wild	4.49981	-0.136119	ID.41.1290	ID.41
1290	3.62218	180	wild	5.19296	-0.136119	ID.41.1290	ID.41
1290	3.62218	10	wild	2.30259	-0.136119	ID.41.1290	ID.41
1290	3.62218	20	wild	2.99573	-0.136119	ID.41.1290	ID.41
1290	3.62218	20	wild	2.99573	-0.136119	ID.41.1290	ID.41
1290	3.62218	180	wild	5.19296	-0.136119	ID.41.1290	ID.41
1290	3.62218	20	wild	2.99573	-0.136119	ID.41.1290	ID.41
1290	3.62218	20	wild	2.99573	-0.136119	ID.41.1290	ID.41
1290	3.62218	20	wild	2.99573	-0.136119	ID.41.1290	ID.41
1290	3.62218	15	wild	2.70805	-0.136119	ID.41.1290	ID.41
1290	3.62218	30	wild	3.4012	-0.136119	ID.41.1290	ID.41
1290	3.62218	20	wild	2.99573	-0.136119	ID.41.1290	ID.41
1290	3.62218	30	wild	3.4012	-0.136119	ID.41.1290	ID.41
1290	3.62218	30	wild	3.4012	-0.136119	ID.41.1290	ID.41
1290	3.62218	10	wild	2.30259	-0.136119	ID.41.1290	ID.41
1290	3.62218	12	wild	2.48491	-0.136119	ID.41.1290	ID.41
1290	3.62218	30	wild	3.4012	-0.136119	ID.41.1290	ID.41
1290	3.62218	10	wild	2.30259	-0.136119	ID.41.1290	ID.41
1290	3.62218	10	wild	2.30259	-0.136119	ID.41.1290	ID.41
1290	3.62218	20	wild	2.99573	-0.136119	ID.41.1290	ID.41
1290	3.62218	15	wild	2.70805	-0.136119	ID.41.1290	ID.41
1290	3.62218	180	wild	5.19296	-0.136119	ID.41.1290	ID.41
1290	3.62218	180	wild	5.19296	-0.136119	ID.41.1290	ID.41
1290	3.62218	10	wild	2.30259	-0.136119	ID.41.1290	ID.41
1290	3.62218	15	wild	2.70805	-0.136119	ID.41.1290	ID.41
1290	3.62218	30	wild	3.4012	-0.136119	ID.41.1290	ID.41
1290	3.62218	20	wild	2.99573	-0.136119	ID.41.1290	ID.41
1290	3.62218	120	wild	4.78749	-0.136119	ID.41.1290	ID.41
1290	3.62218	15	wild	2.70805	-0.136119	ID.41.1290	ID.41
1290	3.62218	10	wild	2.30259	-0.136119	ID.41.1290	ID.41
1290	3.62218	10	wild	2.30259	-0.136119	ID.41.1290	ID.41
1290	3.62218	120	wild	4.78749	-0.136119	ID.41.1290	ID.41
1290	3.62218	120	wild	4.78749	-0.136119	ID.41.1290	ID.41
1290	3.62218	90	wild	4.49981	-0.136119	ID.41.1290	ID.41
1290	3.62218	10	wild	2.30259	-0.136119	ID.41.1290	ID.41
1294	0.681725	10	wild	2.30259	-2.14606	ID.44.1294	ID.44
1294	0.681725	20	wild	2.99573	-2.14606	ID.44.1294	ID.44
1294	0.681725	15	wild	2.70805	-2.14606	ID.44.1294	ID.44
1294	0.681725	60	wild	4.09434	-2.14606	ID.44.1294	ID.44
1294	0.681725	5	wild	1.60944	-2.14606	ID.44.1294	ID.44
1294	0.681725	50	wild	3.91202	-2.14606	ID.44.1294	ID.44
1294	0.681725	20	wild	2.99573	-2.14606	ID.44.1294	ID.44
1294	0.681725	25	wild	3.21888	-2.14606	ID.44.1294	ID.44
1294	0.681725	15	wild	2.70805	-2.14606	ID.44.1294	ID.44
1294	0.681725	20	wild	2.99573	-2.14606	ID.44.1294	ID.44
1294	0.681725	30	wild	3.4012	-2.14606	ID.44.1294	ID.44
1294	0.681725	10	wild	2.30259	-2.14606	ID.44.1294	ID.44
1294	0.681725	30	wild	3.4012	-2.14606	ID.44.1294	ID.44
1294	0.681725	30	wild	3.4012	-2.14606	ID.44.1294	ID.44
1294	0.681725	20	wild	2.99573	-2.14606	ID.44.1294	ID.44
1294	0.681725	30	wild	3.4012	-2.14606	ID.44.1294	ID.44
1294	0.681725	20	wild	2.99573	-2.14606	ID.44.1294	ID.44
1294	0.681725	10	wild	2.30259	-2.14606	ID.44.1294	ID.44
1294	0.681725	60	wild	4.09434	-2.14606	ID.44.1294	ID.44
1294	0.681725	90	wild	4.49981	-2.14606	ID.44.1294	ID.44
1294	0.681725	30	wild	3.4012	-2.14606	ID.44.1294	ID.44
1294	0.681725	120	wild	4.78749	-2.14606	ID.44.1294	ID.44
1294	0.681725	20	wild	2.99573	-2.14606	ID.44.1294	ID.44
1294	0.681725	15	wild	2.70805	-2.14606	ID.44.1294	ID.44
1294	0.681725	30	wild	3.4012	-2.14606	ID.44.1294	ID.44
1294	0.681725	20	wild	2.99573	-2.14606	ID.44.1294	ID.44
1294	0.681725	20	wild	2.99573	-2.14606	ID.44.1294	ID.44
1294	0.681725	15	wild	2.70805	-2.14606	ID.44.1294	ID.44
1294	0.681725	180	wild	5.19296	-2.14606	ID.44.1294	ID.44
1294	0.681725	20	wild	2.99573	-2.14606	ID.44.1294	ID.44
1294	0.681725	15	wild	2.70805	-2.14606	ID.44.1294	ID.44
1294	0.681725	10	wild	2.30259	-2.14606	ID.44.1294	ID.44
1294	0.681725	25	wild	3.21888	-2.14606	ID.44.1294	ID.44
1294	0.681725	10	wild	2.30259	-2.14606	ID.44.1294	ID.44
1294	0.681725	10	wild	2.30259	-2.14606	ID.44.1294	ID.44
1300	0.687201	20	wild	2.99573	-2.13643	ID.44.1300	ID.44
1300	0.687201	30	wild	3.4012	-2.13643	ID.44.1300	ID.44
1300	0.687201	15	wild	2.70805	-2.13643	ID.44.1300	ID.44
1300	0.687201	15	wild	2.70805	-2.13643	ID.44.1300	ID.44
1300	0.687201	20	wild	2.99573	-2.13643	ID.44.1300	ID.44
1300	0.687201	10	wild	2.30259	-2.13643	ID.44.1300	ID.44
1300	0.687201	30	wild	3.4012	-2.13643	ID.44.1300	ID.44
1300	0.687201	10	wild	2.30259	-2.13643	ID.44.1300	ID.44
1300	0.687201	20	wild	2.99573	-2.13643	ID.44.1300	ID.44
1300	0.687201	20	wild	2.99573	-2.13643	ID.44.1300	ID.44
1300	0.687201	20	wild	2.99573	-2.13643	ID.44.1300	ID.44
1300	0.687201	20	wild	2.99573	-2.13643	ID.44.1300	ID.44
1300	0.687201	180	wild	5.19296	-2.13643	ID.44.1300	ID.44
1300	0.687201	60	wild	4.09434	-2.13643	ID.44.1300	ID.44
1300	0.687201	45	wild	3.80666	-2.13643	ID.44.1300	ID.44
1300	0.687201	10	wild	2.30259	-2.13643	ID.44.1300	ID.44
1300	0.687201	15	wild	2.70805	-2.13643	ID.44.1300	ID.44
1300	0.687201	15	wild	2.70805	-2.13643	ID.44.1300	ID.44
1300	0.687201	25	wild	3.21888	-2.13643	ID.44.1300	ID.44
1300	0.687201	10	wild	2.30259	-2.13643	ID.44.1300	ID.44
1300	0.687201	25	wild	3.21888	-2.13643	ID.44.1300	ID.44
1300	0.687201	45	wild	3.80666	-2.13643	ID.44.1300	ID.44
1300	0.687201	90	wild	4.49981	-2.13643	ID.44.1300	ID.44
1300	0.687201	10	wild	2.30259	-2.13643	ID.44.1300	ID.44
1300	0.687201	10	wild	2.30259	-2.13643	ID.44.1300	ID.44
[truncated: 8,814 more rows]

## Sheet: model 2a
followNr	AgeAtThatTime	NumberOfManipulations	Wild_Zoo	z.log.AgeAtThatTime	follow.in.subj	FocalName
54	1.65366	1	wild	-1.15506	ID.42. 54	ID.42
58	1.6564	2	wild	-1.15304	ID.42. 58	ID.42
67	1.66461	4	wild	-1.147	ID.42. 67	ID.42
69	1.66735	1	wild	-1.14499	ID.42. 69	ID.42
124	2.41205	1	wild	-0.693994	ID.3. 124	ID.3
124	2.41205	2	wild	-0.693994	ID.3. 124	ID.3
124	2.41205	2	wild	-0.693994	ID.3. 124	ID.3
126	2.41478	1	wild	-0.692608	ID.3. 126	ID.3
126	2.41478	1	wild	-0.692608	ID.3. 126	ID.3
126	2.41478	1	wild	-0.692608	ID.3. 126	ID.3
126	2.41478	1	wild	-0.692608	ID.3. 126	ID.3
126	2.41478	1	wild	-0.692608	ID.3. 126	ID.3
126	2.41478	1	wild	-0.692608	ID.3. 126	ID.3
126	2.41478	2	wild	-0.692608	ID.3. 126	ID.3
126	2.41478	1	wild	-0.692608	ID.3. 126	ID.3
132	2.423	2	wild	-0.688461	ID.3. 132	ID.3
132	2.423	1	wild	-0.688461	ID.3. 132	ID.3
132	2.423	2	wild	-0.688461	ID.3. 132	ID.3
136	2.42847	2	wild	-0.685703	ID.3. 136	ID.3
2895	59.5483	2	wild	3.22229	ID.16.2895	ID.16
164	6.75702	1	wild	0.564208	ID.22. 164	ID.22
164	6.75702	1	wild	0.564208	ID.22. 164	ID.22
164	6.75702	2	wild	0.564208	ID.22. 164	ID.22
164	6.75702	2	wild	0.564208	ID.22. 164	ID.22
164	6.75702	2	wild	0.564208	ID.22. 164	ID.22
172	8.81314	1	wild	0.888697	ID.1. 172	ID.1
172	8.81314	1	wild	0.888697	ID.1. 172	ID.1
174	8.81862	1	wild	0.889455	ID.1. 174	ID.1
184	5.03491	2	wild	0.204881	ID.35. 184	ID.35
184	5.03491	2	wild	0.204881	ID.35. 184	ID.35
184	5.03491	1	wild	0.204881	ID.35. 184	ID.35
184	5.03491	1	wild	0.204881	ID.35. 184	ID.35
186	2.03696	1	wild	-0.900436	ID.42. 186	ID.42
186	2.03696	2	wild	-0.900436	ID.42. 186	ID.42
200	2.08077	1	wild	-0.874447	ID.42. 200	ID.42
200	2.08077	2	wild	-0.874447	ID.42. 200	ID.42
200	2.08077	1	wild	-0.874447	ID.42. 200	ID.42
200	2.08077	1	wild	-0.874447	ID.42. 200	ID.42
200	2.08077	1	wild	-0.874447	ID.42. 200	ID.42
204	6.94045	1	wild	0.596925	ID.22. 204	ID.22
204	6.94045	2	wild	0.596925	ID.22. 204	ID.22
204	6.94045	2	wild	0.596925	ID.22. 204	ID.22
204	6.94045	1	wild	0.596925	ID.22. 204	ID.22
204	6.94045	1	wild	0.596925	ID.22. 204	ID.22
208	6.94593	1	wild	0.597888	ID.22. 208	ID.22
208	6.94593	2	wild	0.597888	ID.22. 208	ID.22
208	6.94593	1	wild	0.597888	ID.22. 208	ID.22
208	6.94593	3	wild	0.597888	ID.22. 208	ID.22
208	6.94593	1	wild	0.597888	ID.22. 208	ID.22
208	6.94593	1	wild	0.597888	ID.22. 208	ID.22
208	6.94593	2	wild	0.597888	ID.22. 208	ID.22
208	6.94593	2	wild	0.597888	ID.22. 208	ID.22
210	2.69952	1	wild	-0.556462	ID.3. 210	ID.3
210	2.69952	2	wild	-0.556462	ID.3. 210	ID.3
210	2.69952	3	wild	-0.556462	ID.3. 210	ID.3
210	2.69952	2	wild	-0.556462	ID.3. 210	ID.3
210	2.69952	1	wild	-0.556462	ID.3. 210	ID.3
210	2.69952	1	wild	-0.556462	ID.3. 210	ID.3
210	2.69952	1	wild	-0.556462	ID.3. 210	ID.3
210	2.69952	1	wild	-0.556462	ID.3. 210	ID.3
210	2.69952	1	wild	-0.556462	ID.3. 210	ID.3
214	2.70226	1	wild	-0.555224	ID.3. 214	ID.3
214	2.70226	1	wild	-0.555224	ID.3. 214	ID.3
214	2.70226	1	wild	-0.555224	ID.3. 214	ID.3
214	2.70226	1	wild	-0.555224	ID.3. 214	ID.3
214	2.70226	2	wild	-0.555224	ID.3. 214	ID.3
214	2.70226	2	wild	-0.555224	ID.3. 214	ID.3
214	2.70226	1	wild	-0.555224	ID.3. 214	ID.3
214	2.70226	2	wild	-0.555224	ID.3. 214	ID.3
214	2.70226	2	wild	-0.555224	ID.3. 214	ID.3
214	2.70226	1	wild	-0.555224	ID.3. 214	ID.3
214	2.70226	2	wild	-0.555224	ID.3. 214	ID.3
214	2.70226	2	wild	-0.555224	ID.3. 214	ID.3
214	2.70226	3	wild	-0.555224	ID.3. 214	ID.3
215	8.95825	1	wild	0.908644	ID.1. 215	ID.1
215	8.95825	1	wild	0.908644	ID.1. 215	ID.1
215	8.95825	2	wild	0.908644	ID.1. 215	ID.1
217	2.705	2	wild	-0.553987	ID.3. 217	ID.3
217	2.705	1	wild	-0.553987	ID.3. 217	ID.3
217	2.705	2	wild	-0.553987	ID.3. 217	ID.3
220	2.70773	5	wild	-0.552752	ID.3. 220	ID.3
220	2.70773	3	wild	-0.552752	ID.3. 220	ID.3
222	2.71047	1	wild	-0.551517	ID.3. 222	ID.3
222	2.71047	2	wild	-0.551517	ID.3. 222	ID.3
222	2.71047	2	wild	-0.551517	ID.3. 222	ID.3
225	2.71321	1	wild	-0.550284	ID.3. 225	ID.3
225	2.71321	3	wild	-0.550284	ID.3. 225	ID.3
225	2.71321	1	wild	-0.550284	ID.3. 225	ID.3
228	2.71595	2	wild	-0.549052	ID.3. 228	ID.3
228	2.71595	2	wild	-0.549052	ID.3. 228	ID.3
228	2.71595	1	wild	-0.549052	ID.3. 228	ID.3
228	2.71595	1	wild	-0.549052	ID.3. 228	ID.3
228	2.71595	2	wild	-0.549052	ID.3. 228	ID.3
235	5.14168	3	wild	0.230513	ID.35. 235	ID.35
235	5.14168	1	wild	0.230513	ID.35. 235	ID.35
238	5.14442	3	wild	0.231163	ID.35. 238	ID.35
238	5.14442	2	wild	0.231163	ID.35. 238	ID.35
238	5.14442	2	wild	0.231163	ID.35. 238	ID.35
238	5.14442	3	wild	0.231163	ID.35. 238	ID.35
238	5.14442	2	wild	0.231163	ID.35. 238	ID.35
238	5.14442	1	wild	0.231163	ID.35. 238	ID.35
242	5.1499	1	wild	0.232462	ID.35. 242	ID.35
242	5.1499	2	wild	0.232462	ID.35. 242	ID.35
245	5.15264	4	wild	0.233112	ID.35. 245	ID.35
245	5.15264	1	wild	0.233112	ID.35. 245	ID.35
245	5.15264	3	wild	0.233112	ID.35. 245	ID.35
251	7.02532	1	wild	0.611771	ID.22. 251	ID.22
251	7.02532	1	wild	0.611771	ID.22. 251	ID.22
251	7.02532	1	wild	0.611771	ID.22. 251	ID.22
261	7.0527	1	wild	0.616522	ID.22. 261	ID.22
261	7.0527	1	wild	0.616522	ID.22. 261	ID.22
261	7.0527	2	wild	0.616522	ID.22. 261	ID.22
423	9.86174	2	wild	1.02601	ID.1. 423	ID.1
261	7.0527	2	wild	0.616522	ID.22. 261	ID.22
267	2.23135	1	wild	-0.789106	ID.42. 267	ID.42
267	2.23135	1	wild	-0.789106	ID.42. 267	ID.42
305	2.97604	2	wild	-0.437348	ID.3. 305	ID.3
305	2.97604	1	wild	-0.437348	ID.3. 305	ID.3
305	2.97604	1	wild	-0.437348	ID.3. 305	ID.3
305	2.97604	1	wild	-0.437348	ID.3. 305	ID.3
305	2.97604	2	wild	-0.437348	ID.3. 305	ID.3
305	2.97604	1	wild	-0.437348	ID.3. 305	ID.3
305	2.97604	1	wild	-0.437348	ID.3. 305	ID.3
311	2.98699	1	wild	-0.432862	ID.3. 311	ID.3
314	2.98973	3	wild	-0.431742	ID.3. 314	ID.3
314	2.98973	1	wild	-0.431742	ID.3. 314	ID.3
314	2.98973	2	wild	-0.431742	ID.3. 314	ID.3
314	2.98973	2	wild	-0.431742	ID.3. 314	ID.3
314	2.98973	2	wild	-0.431742	ID.3. 314	ID.3
314	2.98973	1	wild	-0.431742	ID.3. 314	ID.3
314	2.98973	3	wild	-0.431742	ID.3. 314	ID.3
314	2.98973	1	wild	-0.431742	ID.3. 314	ID.3
314	2.98973	1	wild	-0.431742	ID.3. 314	ID.3
314	2.98973	1	wild	-0.431742	ID.3. 314	ID.3
314	2.98973	1	wild	-0.431742	ID.3. 314	ID.3
314	2.98973	1	wild	-0.431742	ID.3. 314	ID.3
314	2.98973	1	wild	-0.431742	ID.3. 314	ID.3
314	2.98973	1	wild	-0.431742	ID.3. 314	ID.3
314	2.98973	2	wild	-0.431742	ID.3. 314	ID.3
314	2.98973	1	wild	-0.431742	ID.3. 314	ID.3
314	2.98973	2	wild	-0.431742	ID.3. 314	ID.3
330	10.4476	3	wild	1.0965	ID.9. 330	ID.9
330	10.4476	2	wild	1.0965	ID.9. 330	ID.9
368	5.77139	3	wild	0.371627	ID.35. 368	ID.35
368	5.77139	1	wild	0.371627	ID.35. 368	ID.35
368	5.77139	3	wild	0.371627	ID.35. 368	ID.35
370	5.77413	2	wild	0.372207	ID.35. 370	ID.35
370	5.77413	3	wild	0.372207	ID.35. 370	ID.35
370	5.77413	1	wild	0.372207	ID.35. 370	ID.35
370	5.77413	2	wild	0.372207	ID.35. 370	ID.35
370	5.77413	1	wild	0.372207	ID.35. 370	ID.35
385	7.66324	1	wild	0.71793	ID.22. 385	ID.22
385	7.66324	2	wild	0.71793	ID.22. 385	ID.22
423	9.86174	1	wild	1.02601	ID.1. 423	ID.1
2895	59.5483	2	wild	3.22229	ID.16.2895	ID.16
423	9.86174	2	wild	1.02601	ID.1. 423	ID.1
423	9.86174	1	wild	1.02601	ID.1. 423	ID.1
429	3.61396	3	wild	-0.200134	ID.3. 429	ID.3
429	3.61396	1	wild	-0.200134	ID.3. 429	ID.3
430	3.6167	1	wild	-0.199209	ID.3. 430	ID.3
430	3.6167	1	wild	-0.199209	ID.3. 430	ID.3
430	3.6167	2	wild	-0.199209	ID.3. 430	ID.3
430	3.6167	1	wild	-0.199209	ID.3. 430	ID.3
430	3.6167	2	wild	-0.199209	ID.3. 430	ID.3
430	3.6167	1	wild	-0.199209	ID.3. 430	ID.3
434	3.61944	1	wild	-0.198284	ID.3. 434	ID.3
434	3.61944	2	wild	-0.198284	ID.3. 434	ID.3
436	3.62218	1	wild	-0.197361	ID.3. 436	ID.3
436	3.62218	1	wild	-0.197361	ID.3. 436	ID.3
436	3.62218	1	wild	-0.197361	ID.3. 436	ID.3
436	3.62218	2	wild	-0.197361	ID.3. 436	ID.3
438	3.62491	1	wild	-0.196438	ID.3. 438	ID.3
438	3.62491	1	wild	-0.196438	ID.3. 438	ID.3
438	3.62491	1	wild	-0.196438	ID.3. 438	ID.3
438	3.62491	1	wild	-0.196438	ID.3. 438	ID.3
447	7.91239	2	wild	0.757009	ID.22. 447	ID.22
447	7.91239	1	wild	0.757009	ID.22. 447	ID.22
447	7.91239	2	wild	0.757009	ID.22. 447	ID.22
452	7.9206	1	wild	0.758276	ID.22. 452	ID.22
452	7.9206	2	wild	0.758276	ID.22. 452	ID.22
514	10.1547	1	wild	1.06176	ID.1. 514	ID.1
515	10.1574	2	wild	1.06209	ID.1. 515	ID.1
515	10.1574	1	wild	1.06209	ID.1. 515	ID.1
638	11.7536	2	wild	1.24036	ID.1. 638	ID.1
639	11.7563	3	wild	1.24065	ID.1. 639	ID.1
645	7.93703	1	wild	0.760807	ID.35. 645	ID.35
645	7.93703	2	wild	0.760807	ID.35. 645	ID.35
645	7.93703	2	wild	0.760807	ID.35. 645	ID.35
646	7.93977	2	wild	0.761228	ID.35. 646	ID.35
651	12.8624	1	wild	1.35048	ID.29. 651	ID.29
651	12.8624	2	wild	1.35048	ID.29. 651	ID.29
656	5.54415	1	wild	0.322563	ID.3. 656	ID.3
656	5.54415	2	wild	0.322563	ID.3. 656	ID.3
656	5.54415	1	wild	0.322563	ID.3. 656	ID.3
656	5.54415	2	wild	0.322563	ID.3. 656	ID.3
656	5.54415	1	wild	0.322563	ID.3. 656	ID.3
658	5.54689	1	wild	0.323166	ID.3. 658	ID.3
658	5.54689	1	wild	0.323166	ID.3. 658	ID.3
658	5.54689	1	wild	0.323166	ID.3. 658	ID.3
658	5.54689	2	wild	0.323166	ID.3. 658	ID.3
658	5.54689	1	wild	0.323166	ID.3. 658	ID.3
658	5.54689	1	wild	0.323166	ID.3. 658	ID.3
658	5.54689	1	wild	0.323166	ID.3. 658	ID.3
658	5.54689	1	wild	0.323166	ID.3. 658	ID.3
658	5.54689	1	wild	0.323166	ID.3. 658	ID.3
658	5.54689	1	wild	0.323166	ID.3. 658	ID.3
658	5.54689	3	wild	0.323166	ID.3. 658	ID.3
658	5.54689	1	wild	0.323166	ID.3. 658	ID.3
658	5.54689	2	wild	0.323166	ID.3. 658	ID.3
658	5.54689	1	wild	0.323166	ID.3. 658	ID.3
658	5.54689	1	wild	0.323166	ID.3. 658	ID.3
659	5.54962	3	wild	0.323768	ID.3. 659	ID.3
659	5.54962	2	wild	0.323768	ID.3. 659	ID.3
659	5.54962	1	wild	0.323768	ID.3. 659	ID.3
659	5.54962	2	wild	0.323768	ID.3. 659	ID.3
659	5.54962	2	wild	0.323768	ID.3. 659	ID.3
659	5.54962	2	wild	0.323768	ID.3. 659	ID.3
659	5.54962	2	wild	0.323768	ID.3. 659	ID.3
659	5.54962	2	wild	0.323768	ID.3. 659	ID.3
659	5.54962	1	wild	0.323768	ID.3. 659	ID.3
659	5.54962	2	wild	0.323768	ID.3. 659	ID.3
659	5.54962	1	wild	0.323768	ID.3. 659	ID.3
659	5.54962	3	wild	0.323768	ID.3. 659	ID.3
662	5.5551	1	wild	0.324973	ID.3. 662	ID.3
662	5.5551	2	wild	0.324973	ID.3. 662	ID.3
662	5.5551	1	wild	0.324973	ID.3. 662	ID.3
662	5.5551	1	wild	0.324973	ID.3. 662	ID.3
664	5.55784	2	wild	0.325575	ID.3. 664	ID.3
664	5.55784	2	wild	0.325575	ID.3. 664	ID.3
664	5.55784	2	wild	0.325575	ID.3. 664	ID.3
664	5.55784	1	wild	0.325575	ID.3. 664	ID.3
664	5.55784	1	wild	0.325575	ID.3. 664	ID.3
664	5.55784	3	wild	0.325575	ID.3. 664	ID.3
664	5.55784	2	wild	0.325575	ID.3. 664	ID.3
664	5.55784	1	wild	0.325575	ID.3. 664	ID.3
664	5.55784	2	wild	0.325575	ID.3. 664	ID.3
664	5.55784	1	wild	0.325575	ID.3. 664	ID.3
664	5.55784	2	wild	0.325575	ID.3. 664	ID.3
664	5.55784	1	wild	0.325575	ID.3. 664	ID.3
675	11.8658	2	wild	1.25197	ID.1. 675	ID.1
676	11.8686	1	wild	1.25226	ID.1. 676	ID.1
676	11.8686	1	wild	1.25226	ID.1. 676	ID.1
678	8.03285	2	wild	0.775465	ID.35. 678	ID.35
682	11.8768	1	wild	1.2531	ID.1. 682	ID.1
684	5.62355	1	wild	0.339931	ID.3. 684	ID.3
684	5.62355	1	wild	0.339931	ID.3. 684	ID.3
684	5.62355	2	wild	0.339931	ID.3. 684	ID.3
684	5.62355	1	wild	0.339931	ID.3. 684	ID.3
686	5.62628	1	wild	0.340525	ID.3. 686	ID.3
686	5.62628	1	wild	0.340525	ID.3. 686	ID.3
686	5.62628	1	wild	0.340525	ID.3. 686	ID.3
686	5.62628	1	wild	0.340525	ID.3. 686	ID.3
686	5.62628	1	wild	0.340525	ID.3. 686	ID.3
686	5.62628	2	wild	0.340525	ID.3. 686	ID.3
686	5.62628	2	wild	0.340525	ID.3. 686	ID.3
686	5.62628	1	wild	0.340525	ID.3. 686	ID.3
686	5.62628	1	wild	0.340525	ID.3. 686	ID.3
686	5.62628	1	wild	0.340525	ID.3. 686	ID.3
686	5.62628	1	wild	0.340525	ID.3. 686	ID.3
686	5.62628	2	wild	0.340525	ID.3. 686	ID.3
686	5.62628	1	wild	0.340525	ID.3. 686	ID.3
686	5.62628	1	wild	0.340525	ID.3. 686	ID.3
686	5.62628	2	wild	0.340525	ID.3. 686	ID.3
686	5.62628	2	wild	0.340525	ID.3. 686	ID.3
688	5.62902	1	wild	0.341119	ID.3. 688	ID.3
688	5.62902	1	wild	0.341119	ID.3. 688	ID.3
688	5.62902	1	wild	0.341119	ID.3. 688	ID.3
688	5.62902	2	wild	0.341119	ID.3. 688	ID.3
688	5.62902	2	wild	0.341119	ID.3. 688	ID.3
690	5.63176	1	wild	0.341713	ID.3. 690	ID.3
690	5.63176	1	wild	0.341713	ID.3. 690	ID.3
690	5.63176	2	wild	0.341713	ID.3. 690	ID.3
692	8.04928	1	wild	0.777961	ID.35. 692	ID.35
692	8.04928	1	wild	0.777961	ID.35. 692	ID.35
692	8.04928	1	wild	0.777961	ID.35. 692	ID.35
692	8.04928	1	wild	0.777961	ID.35. 692	ID.35
692	8.04928	1	wild	0.777961	ID.35. 692	ID.35
692	8.04928	1	wild	0.777961	ID.35. 692	ID.35
692	8.04928	1	wild	0.777961	ID.35. 692	ID.35
692	8.04928	1	wild	0.777961	ID.35. 692	ID.35
692	8.04928	1	wild	0.777961	ID.35. 692	ID.35
692	8.04928	1	wild	0.777961	ID.35. 692	ID.35
695	8.05202	1	wild	0.778376	ID.35. 695	ID.35
705	12.9747	1	wild	1.36109	ID.29. 705	ID.29
707	12.9774	1	wild	1.36135	ID.29. 707	ID.29
707	12.9774	1	wild	1.36135	ID.29. 707	ID.29
712	12.9856	2	wild	1.36212	ID.29. 712	ID.29
712	12.9856	3	wild	1.36212	ID.29. 712	ID.29
712	12.9856	2	wild	1.36212	ID.29. 712	ID.29
718	11.9151	2	wild	1.25704	ID.1. 718	ID.1
721	11.9233	1	wild	1.25788	ID.1. 721	ID.1
721	11.9233	1	wild	1.25788	ID.1. 721	ID.1
721	11.9233	1	wild	1.25788	ID.1. 721	ID.1
721	11.9233	2	wild	1.25788	ID.1. 721	ID.1
721	11.9233	1	wild	1.25788	ID.1. 721	ID.1
723	11.9288	2	wild	1.25844	ID.1. 723	ID.1
2745	27.1102	2	wild	2.26118	ID.47.2745	ID.47
2764	26.7871	4	wild	2.24653	ID.49.2764	ID.49
2946	27.2882	2	wild	2.26917	ID.49.2946	ID.49
1864	6.65571	4	wild	0.545758	ID.37.1864	ID.37
736	0.52293	2	wild	-2.5613	ID.37. 736	ID.37
736	0.52293	2	wild	-2.5613	ID.37. 736	ID.37
736	0.52293	2	wild	-2.5613	ID.37. 736	ID.37
736	0.52293	1	wild	-2.5613	ID.37. 736	ID.37
736	0.52293	1	wild	-2.5613	ID.37. 736	ID.37
736	0.52293	1	wild	-2.5613	ID.37. 736	ID.37
739	0.525667	1	wild	-2.55492	ID.37. 739	ID.37
739	0.525667	2	wild	-2.55492	ID.37. 739	ID.37
739	0.525667	1	wild	-2.55492	ID.37. 739	ID.37
739	0.525667	1	wild	-2.55492	ID.37. 739	ID.37
739	0.525667	1	wild	-2.55492	ID.37. 739	ID.37
739	0.525667	1	wild	-2.55492	ID.37. 739	ID.37
739	0.525667	1	wild	-2.55492	ID.37. 739	ID.37
739	0.525667	2	wild	-2.55492	ID.37. 739	ID.37
739	0.525667	1	wild	-2.55492	ID.37. 739	ID.37
739	0.525667	1	wild	-2.55492	ID.37. 739	ID.37
739	0.525667	1	wild	-2.55492	ID.37. 739	ID.37
742	0.528405	1	wild	-2.54857	ID.37. 742	ID.37
742	0.528405	1	wild	-2.54857	ID.37. 742	ID.37
742	0.528405	1	wild	-2.54857	ID.37. 742	ID.37
742	0.528405	1	wild	-2.54857	ID.37. 742	ID.37
742	0.528405	1	wild	-2.54857	ID.37. 742	ID.37
742	0.528405	1	wild	-2.54857	ID.37. 742	ID.37
742	0.528405	1	wild	-2.54857	ID.37. 742	ID.37
742	0.528405	1	wild	-2.54857	ID.37. 742	ID.37
742	0.528405	1	wild	-2.54857	ID.37. 742	ID.37
746	9.94935	1	wild	1.03681	ID.22. 746	ID.22
744	0.531143	1	wild	-2.54226	ID.37. 744	ID.37
744	0.531143	1	wild	-2.54226	ID.37. 744	ID.37
747	0.533881	2	wild	-2.53598	ID.37. 747	ID.37
747	0.533881	1	wild	-2.53598	ID.37. 747	ID.37
747	0.533881	1	wild	-2.53598	ID.37. 747	ID.37
747	0.533881	1	wild	-2.53598	ID.37. 747	ID.37
747	0.533881	1	wild	-2.53598	ID.37. 747	ID.37
747	0.533881	1	wild	-2.53598	ID.37. 747	ID.37
747	0.533881	1	wild	-2.53598	ID.37. 747	ID.37
747	0.533881	3	wild	-2.53598	ID.37. 747	ID.37
747	0.533881	1	wild	-2.53598	ID.37. 747	ID.37
747	0.533881	1	wild	-2.53598	ID.37. 747	ID.37
747	0.533881	1	wild	-2.53598	ID.37. 747	ID.37
747	0.533881	1	wild	-2.53598	ID.37. 747	ID.37
747	0.533881	1	wild	-2.53598	ID.37. 747	ID.37
747	0.533881	1	wild	-2.53598	ID.37. 747	ID.37
747	0.533881	2	wild	-2.53598	ID.37. 747	ID.37
747	0.533881	2	wild	-2.53598	ID.37. 747	ID.37
750	0.539357	1	wild	-2.52352	ID.37. 750	ID.37
750	0.539357	1	wild	-2.52352	ID.37. 750	ID.37
750	0.539357	1	wild	-2.52352	ID.37. 750	ID.37
750	0.539357	1	wild	-2.52352	ID.37. 750	ID.37
750	0.539357	1	wild	-2.52352	ID.37. 750	ID.37
750	0.539357	1	wild	-2.52352	ID.37. 750	ID.37
750	0.539357	1	wild	-2.52352	ID.37. 750	ID.37
750	0.539357	2	wild	-2.52352	ID.37. 750	ID.37
750	0.539357	2	wild	-2.52352	ID.37. 750	ID.37
750	0.539357	1	wild	-2.52352	ID.37. 750	ID.37
750	0.539357	1	wild	-2.52352	ID.37. 750	ID.37
750	0.539357	3	wild	-2.52352	ID.37. 750	ID.37
750	0.539357	1	wild	-2.52352	ID.37. 750	ID.37
750	0.539357	1	wild	-2.52352	ID.37. 750	ID.37
750	0.539357	1	wild	-2.52352	ID.37. 750	ID.37
750	0.539357	1	wild	-2.52352	ID.37. 750	ID.37
750	0.539357	1	wild	-2.52352	ID.37. 750	ID.37
750	0.539357	1	wild	-2.52352	ID.37. 750	ID.37
750	0.539357	2	wild	-2.52352	ID.37. 750	ID.37
750	0.539357	1	wild	-2.52352	ID.37. 750	ID.37
750	0.539357	1	wild	-2.52352	ID.37. 750	ID.37
750	0.539357	4	wild	-2.52352	ID.37. 750	ID.37
750	0.539357	1	wild	-2.52352	ID.37. 750	ID.37
750	0.539357	1	wild	-2.52352	ID.37. 750	ID.37
750	0.539357	1	wild	-2.52352	ID.37. 750	ID.37
750	0.539357	3	wild	-2.52352	ID.37. 750	ID.37
750	0.539357	1	wild	-2.52352	ID.37. 750	ID.37
750	0.539357	2	wild	-2.52352	ID.37. 750	ID.37
750	0.539357	1	wild	-2.52352	ID.37. 750	ID.37
750	0.539357	2	wild	-2.52352	ID.37. 750	ID.37
750	0.539357	4	wild	-2.52352	ID.37. 750	ID.37
750	0.539357	1	wild	-2.52352	ID.37. 750	ID.37
750	0.539357	1	wild	-2.52352	ID.37. 750	ID.37
750	0.539357	1	wild	-2.52352	ID.37. 750	ID.37
750	0.539357	1	wild	-2.52352	ID.37. 750	ID.37
750	0.539357	1	wild	-2.52352	ID.37. 750	ID.37
750	0.539357	1	wild	-2.52352	ID.37. 750	ID.37
750	0.539357	1	wild	-2.52352	ID.37. 750	ID.37
752	0.542094	1	wild	-2.51733	ID.37. 752	ID.37
752	0.542094	1	wild	-2.51733	ID.37. 752	ID.37
752	0.542094	3	wild	-2.51733	ID.37. 752	ID.37
752	0.542094	1	wild	-2.51733	ID.37. 752	ID.37
752	0.542094	1	wild	-2.51733	ID.37. 752	ID.37
752	0.542094	1	wild	-2.51733	ID.37. 752	ID.37
752	0.542094	2	wild	-2.51733	ID.37. 752	ID.37
752	0.542094	2	wild	-2.51733	ID.37. 752	ID.37
755	0.544832	1	wild	-2.51118	ID.37. 755	ID.37
755	0.544832	1	wild	-2.51118	ID.37. 755	ID.37
755	0.544832	1	wild	-2.51118	ID.37. 755	ID.37
755	0.544832	1	wild	-2.51118	ID.37. 755	ID.37
755	0.544832	1	wild	-2.51118	ID.37. 755	ID.37
755	0.544832	1	wild	-2.51118	ID.37. 755	ID.37
755	0.544832	1	wild	-2.51118	ID.37. 755	ID.37
755	0.544832	1	wild	-2.51118	ID.37. 755	ID.37
755	0.544832	1	wild	-2.51118	ID.37. 755	ID.37
755	0.544832	1	wild	-2.51118	ID.37. 755	ID.37
755	0.544832	1	wild	-2.51118	ID.37. 755	ID.37
755	0.544832	3	wild	-2.51118	ID.37. 755	ID.37
755	0.544832	2	wild	-2.51118	ID.37. 755	ID.37
755	0.544832	1	wild	-2.51118	ID.37. 755	ID.37
755	0.544832	1	wild	-2.51118	ID.37. 755	ID.37
755	0.544832	1	wild	-2.51118	ID.37. 755	ID.37
755	0.544832	1	wild	-2.51118	ID.37. 755	ID.37
755	0.544832	1	wild	-2.51118	ID.37. 755	ID.37
755	0.544832	1	wild	-2.51118	ID.37. 755	ID.37
755	0.544832	1	wild	-2.51118	ID.37. 755	ID.37
755	0.544832	1	wild	-2.51118	ID.37. 755	ID.37
755	0.544832	1	wild	-2.51118	ID.37. 755	ID.37
755	0.544832	1	wild	-2.51118	ID.37. 755	ID.37
755	0.544832	1	wild	-2.51118	ID.37. 755	ID.37
755	0.544832	1	wild	-2.51118	ID.37. 755	ID.37
755	0.544832	1	wild	-2.51118	ID.37. 755	ID.37
757	0.54757	2	wild	-2.50506	ID.37. 757	ID.37
757	0.54757	1	wild	-2.50506	ID.37. 757	ID.37
757	0.54757	1	wild	-2.50506	ID.37. 757	ID.37
757	0.54757	1	wild	-2.50506	ID.37. 757	ID.37
758	9.97125	2	wild	1.0395	ID.22. 758	ID.22
758	9.97125	3	wild	1.0395	ID.22. 758	ID.22
758	9.97125	1	wild	1.0395	ID.22. 758	ID.22
758	9.97125	2	wild	1.0395	ID.22. 758	ID.22
758	9.97125	3	wild	1.0395	ID.22. 758	ID.22
758	9.97125	2	wild	1.0395	ID.22. 758	ID.22
758	9.97125	2	wild	1.0395	ID.22. 758	ID.22
758	9.97125	2	wild	1.0395	ID.22. 758	ID.22
760	9.97399	2	wild	1.03983	ID.22. 760	ID.22
760	9.97399	5	wild	1.03983	ID.22. 760	ID.22
760	9.97399	1	wild	1.03983	ID.22. 760	ID.22
760	9.97399	1	wild	1.03983	ID.22. 760	ID.22
766	5.73032	1	wild	0.362905	ID.3. 766	ID.3
766	5.73032	2	wild	0.362905	ID.3. 766	ID.3
766	5.73032	1	wild	0.362905	ID.3. 766	ID.3
766	5.73032	1	wild	0.362905	ID.3. 766	ID.3
766	5.73032	1	wild	0.362905	ID.3. 766	ID.3
766	5.73032	1	wild	0.362905	ID.3. 766	ID.3
766	5.73032	2	wild	0.362905	ID.3. 766	ID.3
766	5.73032	1	wild	0.362905	ID.3. 766	ID.3
766	5.73032	1	wild	0.362905	ID.3. 766	ID.3
766	5.73032	1	wild	0.362905	ID.3. 766	ID.3
766	5.73032	1	wild	0.362905	ID.3. 766	ID.3
766	5.73032	1	wild	0.362905	ID.3. 766	ID.3
766	5.73032	1	wild	0.362905	ID.3. 766	ID.3
766	5.73032	1	wild	0.362905	ID.3. 766	ID.3
766	5.73032	2	wild	0.362905	ID.3. 766	ID.3
766	5.73032	1	wild	0.362905	ID.3. 766	ID.3
766	5.73032	1	wild	0.362905	ID.3. 766	ID.3
766	5.73032	2	wild	0.362905	ID.3. 766	ID.3
766	5.73032	2	wild	0.362905	ID.3. 766	ID.3
766	5.73032	2	wild	0.362905	ID.3. 766	ID.3
766	5.73032	1	wild	0.362905	ID.3. 766	ID.3
766	5.73032	1	wild	0.362905	ID.3. 766	ID.3
766	5.73032	1	wild	0.362905	ID.3. 766	ID.3
766	5.73032	1	wild	0.362905	ID.3. 766	ID.3
766	5.73032	1	wild	0.362905	ID.3. 766	ID.3
766	5.73032	2	wild	0.362905	ID.3. 766	ID.3
766	5.73032	2	wild	0.362905	ID.3. 766	ID.3
766	5.73032	1	wild	0.362905	ID.3. 766	ID.3
766	5.73032	2	wild	0.362905	ID.3. 766	ID.3
766	5.73032	2	wild	0.362905	ID.3. 766	ID.3
768	5.73306	2	wild	0.363488	ID.3. 768	ID.3
768	5.73306	1	wild	0.363488	ID.3. 768	ID.3
768	5.73306	1	wild	0.363488	ID.3. 768	ID.3
768	5.73306	1	wild	0.363488	ID.3. 768	ID.3
768	5.73306	2	wild	0.363488	ID.3. 768	ID.3
768	5.73306	2	wild	0.363488	ID.3. 768	ID.3
768	5.73306	1	wild	0.363488	ID.3. 768	ID.3
768	5.73306	2	wild	0.363488	ID.3. 768	ID.3
768	5.73306	2	wild	0.363488	ID.3. 768	ID.3
768	5.73306	2	wild	0.363488	ID.3. 768	ID.3
768	5.73306	2	wild	0.363488	ID.3. 768	ID.3
768	5.73306	2	wild	0.363488	ID.3. 768	ID.3
768	5.73306	1	wild	0.363488	ID.3. 768	ID.3
768	5.73306	1	wild	0.363488	ID.3. 768	ID.3
768	5.73306	1	wild	0.363488	ID.3. 768	ID.3
768	5.73306	2	wild	0.363488	ID.3. 768	ID.3
768	5.73306	1	wild	0.363488	ID.3. 768	ID.3
768	5.73306	1	wild	0.363488	ID.3. 768	ID.3
768	5.73306	1	wild	0.363488	ID.3. 768	ID.3
768	5.73306	1	wild	0.363488	ID.3. 768	ID.3
768	5.73306	2	wild	0.363488	ID.3. 768	ID.3
768	5.73306	1	wild	0.363488	ID.3. 768	ID.3
768	5.73306	1	wild	0.363488	ID.3. 768	ID.3
787	13.1198	1	wild	1.37468	ID.29. 787	ID.29
787	13.1198	1	wild	1.37468	ID.29. 787	ID.29
787	13.1198	2	wild	1.37468	ID.29. 787	ID.29
788	13.1225	1	wild	1.37493	ID.29. 788	ID.29
788	13.1225	2	wild	1.37493	ID.29. 788	ID.29
793	10.0561	2	wild	1.04985	ID.22. 793	ID.22
793	10.0561	2	wild	1.04985	ID.22. 793	ID.22
793	10.0561	2	wild	1.04985	ID.22. 793	ID.22
793	10.0561	2	wild	1.04985	ID.22. 793	ID.22
793	10.0561	1	wild	1.04985	ID.22. 793	ID.22
793	10.0561	1	wild	1.04985	ID.22. 793	ID.22
797	10.0616	3	wild	1.05051	ID.22. 797	ID.22
797	10.0616	2	wild	1.05051	ID.22. 797	ID.22
797	10.0616	3	wild	1.05051	ID.22. 797	ID.22
797	10.0616	2	wild	1.05051	ID.22. 797	ID.22
797	10.0616	3	wild	1.05051	ID.22. 797	ID.22
798	10.0643	1	wild	1.05085	ID.22. 798	ID.22
798	10.0643	3	wild	1.05085	ID.22. 798	ID.22
798	10.0643	1	wild	1.05085	ID.22. 798	ID.22
798	10.0643	2	wild	1.05085	ID.22. 798	ID.22
803	8.22998	3	wild	0.805077	ID.35. 803	ID.35
803	8.22998	3	wild	0.805077	ID.35. 803	ID.35
803	8.22998	1	wild	0.805077	ID.35. 803	ID.35
803	8.22998	3	wild	0.805077	ID.35. 803	ID.35
803	8.22998	2	wild	0.805077	ID.35. 803	ID.35
803	8.22998	2	wild	0.805077	ID.35. 803	ID.35
806	8.23272	2	wild	0.805483	ID.35. 806	ID.35
806	8.23272	3	wild	0.805483	ID.35. 806	ID.35
813	12.1287	2	wild	1.27873	ID.1. 813	ID.1
757	0.54757	1	wild	-2.50506	ID.37. 757	ID.37
826	0.536619	1	wild	-2.52973	ID.37. 826	ID.37
826	0.536619	2	wild	-2.52973	ID.37. 826	ID.37
826	0.536619	1	wild	-2.52973	ID.37. 826	ID.37
826	0.536619	1	wild	-2.52973	ID.37. 826	ID.37
826	0.536619	1	wild	-2.52973	ID.37. 826	ID.37
826	0.536619	1	wild	-2.52973	ID.37. 826	ID.37
826	0.536619	1	wild	-2.52973	ID.37. 826	ID.37
991	2.83915	1	wild	-0.494865	ID.37. 991	ID.37
991	2.83915	1	wild	-0.494865	ID.37. 991	ID.37
991	2.83915	2	wild	-0.494865	ID.37. 991	ID.37
991	2.83915	1	wild	-0.494865	ID.37. 991	ID.37
991	2.83915	1	wild	-0.494865	ID.37. 991	ID.37
991	2.83915	1	wild	-0.494865	ID.37. 991	ID.37
991	2.83915	1	wild	-0.494865	ID.37. 991	ID.37
991	2.83915	1	wild	-0.494865	ID.37. 991	ID.37
991	2.83915	1	wild	-0.494865	ID.37. 991	ID.37
991	2.83915	1	wild	-0.494865	ID.37. 991	ID.37
991	2.83915	2	wild	-0.494865	ID.37. 991	ID.37
991	2.83915	1	wild	-0.494865	ID.37. 991	ID.37
991	2.83915	1	wild	-0.494865	ID.37. 991	ID.37
991	2.83915	1	wild	-0.494865	ID.37. 991	ID.37
991	2.83915	1	wild	-0.494865	ID.37. 991	ID.37
991	2.83915	2	wild	-0.494865	ID.37. 991	ID.37
991	2.83915	1	wild	-0.494865	ID.37. 991	ID.37
991	2.83915	1	wild	-0.494865	ID.37. 991	ID.37
991	2.83915	1	wild	-0.494865	ID.37. 991	ID.37
991	2.83915	1	wild	-0.494865	ID.37. 991	ID.37
991	2.83915	1	wild	-0.494865	ID.37. 991	ID.37
991	2.83915	1	wild	-0.494865	ID.37. 991	ID.37
991	2.83915	1	wild	-0.494865	ID.37. 991	ID.37
991	2.83915	1	wild	-0.494865	ID.37. 991	ID.37
991	2.83915	1	wild	-0.494865	ID.37. 991	ID.37
991	2.83915	1	wild	-0.494865	ID.37. 991	ID.37
991	2.83915	1	wild	-0.494865	ID.37. 991	ID.37
991	2.83915	1	wild	-0.494865	ID.37. 991	ID.37
991	2.83915	2	wild	-0.494865	ID.37. 991	ID.37
991	2.83915	2	wild	-0.494865	ID.37. 991	ID.37
991	2.83915	1	wild	-0.494865	ID.37. 991	ID.37
991	2.83915	1	wild	-0.494865	ID.37. 991	ID.37
991	2.83915	1	wild	-0.494865	ID.37. 991	ID.37
993	2.84189	1	wild	-0.493687	ID.37. 993	ID.37
993	2.84189	1	wild	-0.493687	ID.37. 993	ID.37
993	2.84189	1	wild	-0.493687	ID.37. 993	ID.37
993	2.84189	1	wild	-0.493687	ID.37. 993	ID.37
993	2.84189	1	wild	-0.493687	ID.37. 993	ID.37
993	2.84189	1	wild	-0.493687	ID.37. 993	ID.37
993	2.84189	1	wild	-0.493687	ID.37. 993	ID.37
993	2.84189	1	wild	-0.493687	ID.37. 993	ID.37
993	2.84189	1	wild	-0.493687	ID.37. 993	ID.37
993	2.84189	1	wild	-0.493687	ID.37. 993	ID.37
993	2.84189	1	wild	-0.493687	ID.37. 993	ID.37
993	2.84189	1	wild	-0.493687	ID.37. 993	ID.37
993	2.84189	1	wild	-0.493687	ID.37. 993	ID.37
993	2.84189	1	wild	-0.493687	ID.37. 993	ID.37
993	2.84189	1	wild	-0.493687	ID.37. 993	ID.37
993	2.84189	2	wild	-0.493687	ID.37. 993	ID.37
993	2.84189	1	wild	-0.493687	ID.37. 993	ID.37
993	2.84189	1	wild	-0.493687	ID.37. 993	ID.37
993	2.84189	1	wild	-0.493687	ID.37. 993	ID.37
993	2.84189	1	wild	-0.493687	ID.37. 993	ID.37
993	2.84189	1	wild	-0.493687	ID.37. 993	ID.37
993	2.84189	2	wild	-0.493687	ID.37. 993	ID.37
993	2.84189	1	wild	-0.493687	ID.37. 993	ID.37
993	2.84189	1	wild	-0.493687	ID.37. 993	ID.37
993	2.84189	1	wild	-0.493687	ID.37. 993	ID.37
993	2.84189	1	wild	-0.493687	ID.37. 993	ID.37
993	2.84189	3	wild	-0.493687	ID.37. 993	ID.37
993	2.84189	1	wild	-0.493687	ID.37. 993	ID.37
993	2.84189	1	wild	-0.493687	ID.37. 993	ID.37
993	2.84189	2	wild	-0.493687	ID.37. 993	ID.37
993	2.84189	2	wild	-0.493687	ID.37. 993	ID.37
993	2.84189	1	wild	-0.493687	ID.37. 993	ID.37
993	2.84189	1	wild	-0.493687	ID.37. 993	ID.37
993	2.84189	2	wild	-0.493687	ID.37. 993	ID.37
993	2.84189	1	wild	-0.493687	ID.37. 993	ID.37
993	2.84189	1	wild	-0.493687	ID.37. 993	ID.37
993	2.84189	1	wild	-0.493687	ID.37. 993	ID.37
993	2.84189	2	wild	-0.493687	ID.37. 993	ID.37
993	2.84189	1	wild	-0.493687	ID.37. 993	ID.37
993	2.84189	1	wild	-0.493687	ID.37. 993	ID.37
993	2.84189	1	wild	-0.493687	ID.37. 993	ID.37
993	2.84189	1	wild	-0.493687	ID.37. 993	ID.37
993	2.84189	1	wild	-0.493687	ID.37. 993	ID.37
993	2.84189	1	wild	-0.493687	ID.37. 993	ID.37
993	2.84189	1	wild	-0.493687	ID.37. 993	ID.37
993	2.84189	1	wild	-0.493687	ID.37. 993	ID.37
993	2.84189	2	wild	-0.493687	ID.37. 993	ID.37
993	2.84189	1	wild	-0.493687	ID.37. 993	ID.37
993	2.84189	1	wild	-0.493687	ID.37. 993	ID.37
993	2.84189	3	wild	-0.493687	ID.37. 993	ID.37
993	2.84189	1	wild	-0.493687	ID.37. 993	ID.37
993	2.84189	1	wild	-0.493687	ID.37. 993	ID.37
993	2.84189	1	wild	-0.493687	ID.37. 993	ID.37
993	2.84189	2	wild	-0.493687	ID.37. 993	ID.37
993	2.84189	1	wild	-0.493687	ID.37. 993	ID.37
993	2.84189	1	wild	-0.493687	ID.37. 993	ID.37
993	2.84189	1	wild	-0.493687	ID.37. 993	ID.37
995	2.84463	1	wild	-0.492511	ID.37. 995	ID.37
995	2.84463	1	wild	-0.492511	ID.37. 995	ID.37
995	2.84463	1	wild	-0.492511	ID.37. 995	ID.37
995	2.84463	1	wild	-0.492511	ID.37. 995	ID.37
995	2.84463	1	wild	-0.492511	ID.37. 995	ID.37
995	2.84463	1	wild	-0.492511	ID.37. 995	ID.37
995	2.84463	2	wild	-0.492511	ID.37. 995	ID.37
995	2.84463	2	wild	-0.492511	ID.37. 995	ID.37
995	2.84463	1	wild	-0.492511	ID.37. 995	ID.37
995	2.84463	1	wild	-0.492511	ID.37. 995	ID.37
995	2.84463	1	wild	-0.492511	ID.37. 995	ID.37
995	2.84463	1	wild	-0.492511	ID.37. 995	ID.37
995	2.84463	2	wild	-0.492511	ID.37. 995	ID.37
995	2.84463	1	wild	-0.492511	ID.37. 995	ID.37
995	2.84463	2	wild	-0.492511	ID.37. 995	ID.37
995	2.84463	2	wild	-0.492511	ID.37. 995	ID.37
995	2.84463	1	wild	-0.492511	ID.37. 995	ID.37
995	2.84463	1	wild	-0.492511	ID.37. 995	ID.37
995	2.84463	3	wild	-0.492511	ID.37. 995	ID.37
995	2.84463	1	wild	-0.492511	ID.37. 995	ID.37
995	2.84463	1	wild	-0.492511	ID.37. 995	ID.37
995	2.84463	1	wild	-0.492511	ID.37. 995	ID.37
995	2.84463	2	wild	-0.492511	ID.37. 995	ID.37
995	2.84463	1	wild	-0.492511	ID.37. 995	ID.37
995	2.84463	3	wild	-0.492511	ID.37. 995	ID.37
995	2.84463	1	wild	-0.492511	ID.37. 995	ID.37
995	2.84463	1	wild	-0.492511	ID.37. 995	ID.37
995	2.84463	1	wild	-0.492511	ID.37. 995	ID.37
995	2.84463	1	wild	-0.492511	ID.37. 995	ID.37
995	2.84463	5	wild	-0.492511	ID.37. 995	ID.37
995	2.84463	1	wild	-0.492511	ID.37. 995	ID.37
995	2.84463	1	wild	-0.492511	ID.37. 995	ID.37
995	2.84463	2	wild	-0.492511	ID.37. 995	ID.37
995	2.84463	3	wild	-0.492511	ID.37. 995	ID.37
995	2.84463	1	wild	-0.492511	ID.37. 995	ID.37
995	2.84463	1	wild	-0.492511	ID.37. 995	ID.37
995	2.84463	2	wild	-0.492511	ID.37. 995	ID.37
995	2.84463	1	wild	-0.492511	ID.37. 995	ID.37
995	2.84463	1	wild	-0.492511	ID.37. 995	ID.37
995	2.84463	1	wild	-0.492511	ID.37. 995	ID.37
995	2.84463	2	wild	-0.492511	ID.37. 995	ID.37
995	2.84463	3	wild	-0.492511	ID.37. 995	ID.37
995	2.84463	1	wild	-0.492511	ID.37. 995	ID.37
995	2.84463	3	wild	-0.492511	ID.37. 995	ID.37
995	2.84463	1	wild	-0.492511	ID.37. 995	ID.37
995	2.84463	2	wild	-0.492511	ID.37. 995	ID.37
995	2.84463	1	wild	-0.492511	ID.37. 995	ID.37
995	2.84463	1	wild	-0.492511	ID.37. 995	ID.37
995	2.84463	1	wild	-0.492511	ID.37. 995	ID.37
995	2.84463	2	wild	-0.492511	ID.37. 995	ID.37
995	2.84463	1	wild	-0.492511	ID.37. 995	ID.37
995	2.84463	2	wild	-0.492511	ID.37. 995	ID.37
995	2.84463	1	wild	-0.492511	ID.37. 995	ID.37
995	2.84463	3	wild	-0.492511	ID.37. 995	ID.37
995	2.84463	3	wild	-0.492511	ID.37. 995	ID.37
995	2.84463	2	wild	-0.492511	ID.37. 995	ID.37
995	2.84463	1	wild	-0.492511	ID.37. 995	ID.37
995	2.84463	2	wild	-0.492511	ID.37. 995	ID.37
995	2.84463	2	wild	-0.492511	ID.37. 995	ID.37
995	2.84463	1	wild	-0.492511	ID.37. 995	ID.37
995	2.84463	2	wild	-0.492511	ID.37. 995	ID.37
995	2.84463	1	wild	-0.492511	ID.37. 995	ID.37
995	2.84463	1	wild	-0.492511	ID.37. 995	ID.37
995	2.84463	1	wild	-0.492511	ID.37. 995	ID.37
995	2.84463	1	wild	-0.492511	ID.37. 995	ID.37
995	2.84463	3	wild	-0.492511	ID.37. 995	ID.37
995	2.84463	3	wild	-0.492511	ID.37. 995	ID.37
995	2.84463	2	wild	-0.492511	ID.37. 995	ID.37
995	2.84463	1	wild	-0.492511	ID.37. 995	ID.37
995	2.84463	1	wild	-0.492511	ID.37. 995	ID.37
995	2.84463	3	wild	-0.492511	ID.37. 995	ID.37
995	2.84463	1	wild	-0.492511	ID.37. 995	ID.37
995	2.84463	2	wild	-0.492511	ID.37. 995	ID.37
995	2.84463	1	wild	-0.492511	ID.37. 995	ID.37
995	2.84463	1	wild	-0.492511	ID.37. 995	ID.37
995	2.84463	1	wild	-0.492511	ID.37. 995	ID.37
995	2.84463	1	wild	-0.492511	ID.37. 995	ID.37
995	2.84463	2	wild	-0.492511	ID.37. 995	ID.37
995	2.84463	1	wild	-0.492511	ID.37. 995	ID.37
995	2.84463	1	wild	-0.492511	ID.37. 995	ID.37
995	2.84463	1	wild	-0.492511	ID.37. 995	ID.37
995	2.84463	1	wild	-0.492511	ID.37. 995	ID.37
995	2.84463	1	wild	-0.492511	ID.37. 995	ID.37
999	2.8501	1	wild	-0.490162	ID.37. 999	ID.37
999	2.8501	1	wild	-0.490162	ID.37. 999	ID.37
999	2.8501	1	wild	-0.490162	ID.37. 999	ID.37
999	2.8501	1	wild	-0.490162	ID.37. 999	ID.37
999	2.8501	1	wild	-0.490162	ID.37. 999	ID.37
999	2.8501	1	wild	-0.490162	ID.37. 999	ID.37
999	2.8501	1	wild	-0.490162	ID.37. 999	ID.37
1001	2.85284	1	wild	-0.488989	ID.37.1001	ID.37
1001	2.85284	1	wild	-0.488989	ID.37.1001	ID.37
1001	2.85284	2	wild	-0.488989	ID.37.1001	ID.37
1001	2.85284	1	wild	-0.488989	ID.37.1001	ID.37
1001	2.85284	1	wild	-0.488989	ID.37.1001	ID.37
1001	2.85284	2	wild	-0.488989	ID.37.1001	ID.37
1001	2.85284	1	wild	-0.488989	ID.37.1001	ID.37
1001	2.85284	2	wild	-0.488989	ID.37.1001	ID.37
1001	2.85284	1	wild	-0.488989	ID.37.1001	ID.37
1001	2.85284	1	wild	-0.488989	ID.37.1001	ID.37
1001	2.85284	2	wild	-0.488989	ID.37.1001	ID.37
1001	2.85284	1	wild	-0.488989	ID.37.1001	ID.37
1001	2.85284	1	wild	-0.488989	ID.37.1001	ID.37
1001	2.85284	1	wild	-0.488989	ID.37.1001	ID.37
1001	2.85284	1	wild	-0.488989	ID.37.1001	ID.37
1001	2.85284	3	wild	-0.488989	ID.37.1001	ID.37
1001	2.85284	3	wild	-0.488989	ID.37.1001	ID.37
1001	2.85284	2	wild	-0.488989	ID.37.1001	ID.37
1001	2.85284	2	wild	-0.488989	ID.37.1001	ID.37
1001	2.85284	1	wild	-0.488989	ID.37.1001	ID.37
1001	2.85284	1	wild	-0.488989	ID.37.1001	ID.37
1001	2.85284	1	wild	-0.488989	ID.37.1001	ID.37
1001	2.85284	1	wild	-0.488989	ID.37.1001	ID.37
1001	2.85284	1	wild	-0.488989	ID.37.1001	ID.37
1001	2.85284	2	wild	-0.488989	ID.37.1001	ID.37
1001	2.85284	1	wild	-0.488989	ID.37.1001	ID.37
1001	2.85284	2	wild	-0.488989	ID.37.1001	ID.37
1001	2.85284	2	wild	-0.488989	ID.37.1001	ID.37
1001	2.85284	1	wild	-0.488989	ID.37.1001	ID.37
1001	2.85284	2	wild	-0.488989	ID.37.1001	ID.37
1001	2.85284	2	wild	-0.488989	ID.37.1001	ID.37
1001	2.85284	1	wild	-0.488989	ID.37.1001	ID.37
1001	2.85284	1	wild	-0.488989	ID.37.1001	ID.37
1001	2.85284	2	wild	-0.488989	ID.37.1001	ID.37
1001	2.85284	1	wild	-0.488989	ID.37.1001	ID.37
1001	2.85284	1	wild	-0.488989	ID.37.1001	ID.37
1001	2.85284	1	wild	-0.488989	ID.37.1001	ID.37
1001	2.85284	2	wild	-0.488989	ID.37.1001	ID.37
1001	2.85284	1	wild	-0.488989	ID.37.1001	ID.37
1001	2.85284	3	wild	-0.488989	ID.37.1001	ID.37
1001	2.85284	2	wild	-0.488989	ID.37.1001	ID.37
1001	2.85284	3	wild	-0.488989	ID.37.1001	ID.37
1001	2.85284	1	wild	-0.488989	ID.37.1001	ID.37
1001	2.85284	3	wild	-0.488989	ID.37.1001	ID.37
1001	2.85284	2	wild	-0.488989	ID.37.1001	ID.37
1001	2.85284	1	wild	-0.488989	ID.37.1001	ID.37
1001	2.85284	1	wild	-0.488989	ID.37.1001	ID.37
1001	2.85284	2	wild	-0.488989	ID.37.1001	ID.37
1001	2.85284	1	wild	-0.488989	ID.37.1001	ID.37
1001	2.85284	4	wild	-0.488989	ID.37.1001	ID.37
1001	2.85284	2	wild	-0.488989	ID.37.1001	ID.37
1001	2.85284	1	wild	-0.488989	ID.37.1001	ID.37
1001	2.85284	2	wild	-0.488989	ID.37.1001	ID.37
1001	2.85284	1	wild	-0.488989	ID.37.1001	ID.37
1001	2.85284	3	wild	-0.488989	ID.37.1001	ID.37
1001	2.85284	2	wild	-0.488989	ID.37.1001	ID.37
1001	2.85284	2	wild	-0.488989	ID.37.1001	ID.37
1001	2.85284	1	wild	-0.488989	ID.37.1001	ID.37
1001	2.85284	2	wild	-0.488989	ID.37.1001	ID.37
1001	2.85284	2	wild	-0.488989	ID.37.1001	ID.37
1001	2.85284	2	wild	-0.488989	ID.37.1001	ID.37
1001	2.85284	1	wild	-0.488989	ID.37.1001	ID.37
1001	2.85284	1	wild	-0.488989	ID.37.1001	ID.37
1001	2.85284	2	wild	-0.488989	ID.37.1001	ID.37
1001	2.85284	2	wild	-0.488989	ID.37.1001	ID.37
1001	2.85284	1	wild	-0.488989	ID.37.1001	ID.37
1001	2.85284	1	wild	-0.488989	ID.37.1001	ID.37
1001	2.85284	2	wild	-0.488989	ID.37.1001	ID.37
1001	2.85284	3	wild	-0.488989	ID.37.1001	ID.37
1001	2.85284	1	wild	-0.488989	ID.37.1001	ID.37
1001	2.85284	1	wild	-0.488989	ID.37.1001	ID.37
1001	2.85284	1	wild	-0.488989	ID.37.1001	ID.37
1001	2.85284	2	wild	-0.488989	ID.37.1001	ID.37
1001	2.85284	1	wild	-0.488989	ID.37.1001	ID.37
1001	2.85284	2	wild	-0.488989	ID.37.1001	ID.37
1001	2.85284	1	wild	-0.488989	ID.37.1001	ID.37
1001	2.85284	2	wild	-0.488989	ID.37.1001	ID.37
1001	2.85284	1	wild	-0.488989	ID.37.1001	ID.37
1001	2.85284	2	wild	-0.488989	ID.37.1001	ID.37
1001	2.85284	2	wild	-0.488989	ID.37.1001	ID.37
1001	2.85284	2	wild	-0.488989	ID.37.1001	ID.37
1001	2.85284	1	wild	-0.488989	ID.37.1001	ID.37
1001	2.85284	1	wild	-0.488989	ID.37.1001	ID.37
1001	2.85284	1	wild	-0.488989	ID.37.1001	ID.37
1001	2.85284	1	wild	-0.488989	ID.37.1001	ID.37
1001	2.85284	1	wild	-0.488989	ID.37.1001	ID.37
1001	2.85284	1	wild	-0.488989	ID.37.1001	ID.37
1001	2.85284	1	wild	-0.488989	ID.37.1001	ID.37
1001	2.85284	1	wild	-0.488989	ID.37.1001	ID.37
1018	0.867899	1	wild	-1.94249	ID.12.1018	ID.12
1018	0.867899	2	wild	-1.94249	ID.12.1018	ID.12
1018	0.867899	1	wild	-1.94249	ID.12.1018	ID.12
1018	0.867899	1	wild	-1.94249	ID.12.1018	ID.12
1018	0.867899	1	wild	-1.94249	ID.12.1018	ID.12
1018	0.867899	1	wild	-1.94249	ID.12.1018	ID.12
1018	0.867899	1	wild	-1.94249	ID.12.1018	ID.12
1018	0.867899	1	wild	-1.94249	ID.12.1018	ID.12
1018	0.867899	1	wild	-1.94249	ID.12.1018	ID.12
1018	0.867899	1	wild	-1.94249	ID.12.1018	ID.12
1018	0.867899	1	wild	-1.94249	ID.12.1018	ID.12
1018	0.867899	1	wild	-1.94249	ID.12.1018	ID.12
1018	0.867899	2	wild	-1.94249	ID.12.1018	ID.12
1018	0.867899	2	wild	-1.94249	ID.12.1018	ID.12
1018	0.867899	1	wild	-1.94249	ID.12.1018	ID.12
1018	0.867899	2	wild	-1.94249	ID.12.1018	ID.12
1018	0.867899	1	wild	-1.94249	ID.12.1018	ID.12
1018	0.867899	1	wild	-1.94249	ID.12.1018	ID.12
1018	0.867899	1	wild	-1.94249	ID.12.1018	ID.12
1018	0.867899	1	wild	-1.94249	ID.12.1018	ID.12
1018	0.867899	1	wild	-1.94249	ID.12.1018	ID.12
1018	0.867899	2	wild	-1.94249	ID.12.1018	ID.12
1018	0.867899	2	wild	-1.94249	ID.12.1018	ID.12
1018	0.867899	1	wild	-1.94249	ID.12.1018	ID.12
1018	0.867899	2	wild	-1.94249	ID.12.1018	ID.12
1018	0.867899	1	wild	-1.94249	ID.12.1018	ID.12
1018	0.867899	1	wild	-1.94249	ID.12.1018	ID.12
1018	0.867899	2	wild	-1.94249	ID.12.1018	ID.12
1018	0.867899	1	wild	-1.94249	ID.12.1018	ID.12
1018	0.867899	1	wild	-1.94249	ID.12.1018	ID.12
1018	0.867899	1	wild	-1.94249	ID.12.1018	ID.12
1018	0.867899	2	wild	-1.94249	ID.12.1018	ID.12
1018	0.867899	1	wild	-1.94249	ID.12.1018	ID.12
1018	0.867899	2	wild	-1.94249	ID.12.1018	ID.12
1018	0.867899	2	wild	-1.94249	ID.12.1018	ID.12
1018	0.867899	1	wild	-1.94249	ID.12.1018	ID.12
1018	0.867899	2	wild	-1.94249	ID.12.1018	ID.12
1018	0.867899	2	wild	-1.94249	ID.12.1018	ID.12
1018	0.867899	1	wild	-1.94249	ID.12.1018	ID.12
1018	0.867899	1	wild	-1.94249	ID.12.1018	ID.12
1018	0.867899	2	wild	-1.94249	ID.12.1018	ID.12
1018	0.867899	1	wild	-1.94249	ID.12.1018	ID.12
1018	0.867899	2	wild	-1.94249	ID.12.1018	ID.12
1024	0.876112	1	wild	-1.93098	ID.12.1024	ID.12
1024	0.876112	1	wild	-1.93098	ID.12.1024	ID.12
1024	0.876112	3	wild	-1.93098	ID.12.1024	ID.12
1024	0.876112	1	wild	-1.93098	ID.12.1024	ID.12
1024	0.876112	2	wild	-1.93098	ID.12.1024	ID.12
1024	0.876112	1	wild	-1.93098	ID.12.1024	ID.12
1024	0.876112	1	wild	-1.93098	ID.12.1024	ID.12
1024	0.876112	1	wild	-1.93098	ID.12.1024	ID.12
1024	0.876112	1	wild	-1.93098	ID.12.1024	ID.12
1024	0.876112	1	wild	-1.93098	ID.12.1024	ID.12
1024	0.876112	2	wild	-1.93098	ID.12.1024	ID.12
1024	0.876112	1	wild	-1.93098	ID.12.1024	ID.12
1024	0.876112	2	wild	-1.93098	ID.12.1024	ID.12
1024	0.876112	1	wild	-1.93098	ID.12.1024	ID.12
1024	0.876112	1	wild	-1.93098	ID.12.1024	ID.12
1024	0.876112	1	wild	-1.93098	ID.12.1024	ID.12
1024	0.876112	1	wild	-1.93098	ID.12.1024	ID.12
1024	0.876112	1	wild	-1.93098	ID.12.1024	ID.12
1024	0.876112	1	wild	-1.93098	ID.12.1024	ID.12
1024	0.876112	1	wild	-1.93098	ID.12.1024	ID.12
1024	0.876112	1	wild	-1.93098	ID.12.1024	ID.12
1024	0.876112	1	wild	-1.93098	ID.12.1024	ID.12
1024	0.876112	1	wild	-1.93098	ID.12.1024	ID.12
1024	0.876112	1	wild	-1.93098	ID.12.1024	ID.12
1024	0.876112	1	wild	-1.93098	ID.12.1024	ID.12
1024	0.876112	1	wild	-1.93098	ID.12.1024	ID.12
1024	0.876112	1	wild	-1.93098	ID.12.1024	ID.12
1024	0.876112	1	wild	-1.93098	ID.12.1024	ID.12
1024	0.876112	2	wild	-1.93098	ID.12.1024	ID.12
1024	0.876112	1	wild	-1.93098	ID.12.1024	ID.12
1024	0.876112	1	wild	-1.93098	ID.12.1024	ID.12
1024	0.876112	1	wild	-1.93098	ID.12.1024	ID.12
1024	0.876112	2	wild	-1.93098	ID.12.1024	ID.12
1024	0.876112	2	wild	-1.93098	ID.12.1024	ID.12
1024	0.876112	1	wild	-1.93098	ID.12.1024	ID.12
1024	0.876112	2	wild	-1.93098	ID.12.1024	ID.12
1024	0.876112	2	wild	-1.93098	ID.12.1024	ID.12
1024	0.876112	3	wild	-1.93098	ID.12.1024	ID.12
1024	0.876112	1	wild	-1.93098	ID.12.1024	ID.12
1029	0.881588	1	wild	-1.92337	ID.12.1029	ID.12
1029	0.881588	2	wild	-1.92337	ID.12.1029	ID.12
1029	0.881588	1	wild	-1.92337	ID.12.1029	ID.12
1029	0.881588	2	wild	-1.92337	ID.12.1029	ID.12
1029	0.881588	2	wild	-1.92337	ID.12.1029	ID.12
1029	0.881588	1	wild	-1.92337	ID.12.1029	ID.12
1029	0.881588	1	wild	-1.92337	ID.12.1029	ID.12
1029	0.881588	2	wild	-1.92337	ID.12.1029	ID.12
1029	0.881588	1	wild	-1.92337	ID.12.1029	ID.12
1029	0.881588	2	wild	-1.92337	ID.12.1029	ID.12
1029	0.881588	2	wild	-1.92337	ID.12.1029	ID.12
1029	0.881588	1	wild	-1.92337	ID.12.1029	ID.12
1029	0.881588	2	wild	-1.92337	ID.12.1029	ID.12
1029	0.881588	1	wild	-1.92337	ID.12.1029	ID.12
1029	0.881588	2	wild	-1.92337	ID.12.1029	ID.12
1029	0.881588	3	wild	-1.92337	ID.12.1029	ID.12
1029	0.881588	1	wild	-1.92337	ID.12.1029	ID.12
1029	0.881588	1	wild	-1.92337	ID.12.1029	ID.12
1029	0.881588	1	wild	-1.92337	ID.12.1029	ID.12
1029	0.881588	1	wild	-1.92337	ID.12.1029	ID.12
1029	0.881588	2	wild	-1.92337	ID.12.1029	ID.12
1029	0.881588	1	wild	-1.92337	ID.12.1029	ID.12
1029	0.881588	2	wild	-1.92337	ID.12.1029	ID.12
1029	0.881588	1	wild	-1.92337	ID.12.1029	ID.12
1029	0.881588	2	wild	-1.92337	ID.12.1029	ID.12
1029	0.881588	1	wild	-1.92337	ID.12.1029	ID.12
1029	0.881588	1	wild	-1.92337	ID.12.1029	ID.12
1029	0.881588	2	wild	-1.92337	ID.12.1029	ID.12
1029	0.881588	1	wild	-1.92337	ID.12.1029	ID.12
1029	0.881588	1	wild	-1.92337	ID.12.1029	ID.12
1029	0.881588	1	wild	-1.92337	ID.12.1029	ID.12
1029	0.881588	2	wild	-1.92337	ID.12.1029	ID.12
1029	0.881588	1	wild	-1.92337	ID.12.1029	ID.12
1029	0.881588	1	wild	-1.92337	ID.12.1029	ID.12
1029	0.881588	1	wild	-1.92337	ID.12.1029	ID.12
1029	0.881588	2	wild	-1.92337	ID.12.1029	ID.12
1029	0.881588	3	wild	-1.92337	ID.12.1029	ID.12
1029	0.881588	3	wild	-1.92337	ID.12.1029	ID.12
1029	0.881588	2	wild	-1.92337	ID.12.1029	ID.12
1029	0.881588	2	wild	-1.92337	ID.12.1029	ID.12
1029	0.881588	2	wild	-1.92337	ID.12.1029	ID.12
1029	0.881588	1	wild	-1.92337	ID.12.1029	ID.12
1029	0.881588	1	wild	-1.92337	ID.12.1029	ID.12
1029	0.881588	1	wild	-1.92337	ID.12.1029	ID.12
1029	0.881588	1	wild	-1.92337	ID.12.1029	ID.12
1029	0.881588	2	wild	-1.92337	ID.12.1029	ID.12
1029	0.881588	1	wild	-1.92337	ID.12.1029	ID.12
1029	0.881588	1	wild	-1.92337	ID.12.1029	ID.12
1029	0.881588	2	wild	-1.92337	ID.12.1029	ID.12
1029	0.881588	1	wild	-1.92337	ID.12.1029	ID.12
1029	0.881588	1	wild	-1.92337	ID.12.1029	ID.12
1029	0.881588	1	wild	-1.92337	ID.12.1029	ID.12
1029	0.881588	2	wild	-1.92337	ID.12.1029	ID.12
1029	0.881588	2	wild	-1.92337	ID.12.1029	ID.12
1029	0.881588	2	wild	-1.92337	ID.12.1029	ID.12
1029	0.881588	1	wild	-1.92337	ID.12.1029	ID.12
1029	0.881588	2	wild	-1.92337	ID.12.1029	ID.12
1029	0.881588	1	wild	-1.92337	ID.12.1029	ID.12
1029	0.881588	2	wild	-1.92337	ID.12.1029	ID.12
1029	0.881588	2	wild	-1.92337	ID.12.1029	ID.12
1029	0.881588	2	wild	-1.92337	ID.12.1029	ID.12
1029	0.881588	1	wild	-1.92337	ID.12.1029	ID.12
1029	0.881588	1	wild	-1.92337	ID.12.1029	ID.12
1029	0.881588	1	wild	-1.92337	ID.12.1029	ID.12
1029	0.881588	2	wild	-1.92337	ID.12.1029	ID.12
1029	0.881588	1	wild	-1.92337	ID.12.1029	ID.12
1029	0.881588	2	wild	-1.92337	ID.12.1029	ID.12
1029	0.881588	2	wild	-1.92337	ID.12.1029	ID.12
1029	0.881588	2	wild	-1.92337	ID.12.1029	ID.12
1029	0.881588	1	wild	-1.92337	ID.12.1029	ID.12
1029	0.881588	1	wild	-1.92337	ID.12.1029	ID.12
1029	0.881588	1	wild	-1.92337	ID.12.1029	ID.12
1029	0.881588	1	wild	-1.92337	ID.12.1029	ID.12
1029	0.881588	1	wild	-1.92337	ID.12.1029	ID.12
1029	0.881588	1	wild	-1.92337	ID.12.1029	ID.12
1029	0.881588	2	wild	-1.92337	ID.12.1029	ID.12
1034	0.887064	1	wild	-1.91581	ID.12.1034	ID.12
1034	0.887064	2	wild	-1.91581	ID.12.1034	ID.12
1034	0.887064	2	wild	-1.91581	ID.12.1034	ID.12
1034	0.887064	2	wild	-1.91581	ID.12.1034	ID.12
1034	0.887064	2	wild	-1.91581	ID.12.1034	ID.12
1034	0.887064	1	wild	-1.91581	ID.12.1034	ID.12
1034	0.887064	2	wild	-1.91581	ID.12.1034	ID.12
1034	0.887064	1	wild	-1.91581	ID.12.1034	ID.12
1034	0.887064	1	wild	-1.91581	ID.12.1034	ID.12
1034	0.887064	1	wild	-1.91581	ID.12.1034	ID.12
1034	0.887064	1	wild	-1.91581	ID.12.1034	ID.12
1034	0.887064	1	wild	-1.91581	ID.12.1034	ID.12
1034	0.887064	2	wild	-1.91581	ID.12.1034	ID.12
1034	0.887064	2	wild	-1.91581	ID.12.1034	ID.12
1034	0.887064	1	wild	-1.91581	ID.12.1034	ID.12
1034	0.887064	1	wild	-1.91581	ID.12.1034	ID.12
1034	0.887064	1	wild	-1.91581	ID.12.1034	ID.12
1034	0.887064	1	wild	-1.91581	ID.12.1034	ID.12
1034	0.887064	2	wild	-1.91581	ID.12.1034	ID.12
1034	0.887064	3	wild	-1.91581	ID.12.1034	ID.12
1034	0.887064	3	wild	-1.91581	ID.12.1034	ID.12
1034	0.887064	1	wild	-1.91581	ID.12.1034	ID.12
1034	0.887064	3	wild	-1.91581	ID.12.1034	ID.12
1034	0.887064	2	wild	-1.91581	ID.12.1034	ID.12
1034	0.887064	1	wild	-1.91581	ID.12.1034	ID.12
1034	0.887064	3	wild	-1.91581	ID.12.1034	ID.12
1034	0.887064	3	wild	-1.91581	ID.12.1034	ID.12
1034	0.887064	3	wild	-1.91581	ID.12.1034	ID.12
1034	0.887064	3	wild	-1.91581	ID.12.1034	ID.12
1034	0.887064	2	wild	-1.91581	ID.12.1034	ID.12
1034	0.887064	3	wild	-1.91581	ID.12.1034	ID.12
1034	0.887064	3	wild	-1.91581	ID.12.1034	ID.12
1034	0.887064	3	wild	-1.91581	ID.12.1034	ID.12
1034	0.887064	1	wild	-1.91581	ID.12.1034	ID.12
1034	0.887064	2	wild	-1.91581	ID.12.1034	ID.12
1034	0.887064	1	wild	-1.91581	ID.12.1034	ID.12
1034	0.887064	3	wild	-1.91581	ID.12.1034	ID.12
1034	0.887064	1	wild	-1.91581	ID.12.1034	ID.12
1034	0.887064	2	wild	-1.91581	ID.12.1034	ID.12
1034	0.887064	2	wild	-1.91581	ID.12.1034	ID.12
1034	0.887064	1	wild	-1.91581	ID.12.1034	ID.12
1034	0.887064	2	wild	-1.91581	ID.12.1034	ID.12
1034	0.887064	2	wild	-1.91581	ID.12.1034	ID.12
1034	0.887064	2	wild	-1.91581	ID.12.1034	ID.12
1034	0.887064	1	wild	-1.91581	ID.12.1034	ID.12
1034	0.887064	1	wild	-1.91581	ID.12.1034	ID.12
1034	0.887064	1	wild	-1.91581	ID.12.1034	ID.12
1034	0.887064	2	wild	-1.91581	ID.12.1034	ID.12
1034	0.887064	3	wild	-1.91581	ID.12.1034	ID.12
1034	0.887064	2	wild	-1.91581	ID.12.1034	ID.12
1034	0.887064	1	wild	-1.91581	ID.12.1034	ID.12
1034	0.887064	1	wild	-1.91581	ID.12.1034	ID.12
1034	0.887064	2	wild	-1.91581	ID.12.1034	ID.12
1034	0.887064	1	wild	-1.91581	ID.12.1034	ID.12
1034	0.887064	1	wild	-1.91581	ID.12.1034	ID.12
1034	0.887064	2	wild	-1.91581	ID.12.1034	ID.12
1034	0.887064	2	wild	-1.91581	ID.12.1034	ID.12
1034	0.887064	2	wild	-1.91581	ID.12.1034	ID.12
1034	0.887064	2	wild	-1.91581	ID.12.1034	ID.12
1034	0.887064	2	wild	-1.91581	ID.12.1034	ID.12
1034	0.887064	1	wild	-1.91581	ID.12.1034	ID.12
1034	0.887064	1	wild	-1.91581	ID.12.1034	ID.12
1034	0.887064	2	wild	-1.91581	ID.12.1034	ID.12
1034	0.887064	3	wild	-1.91581	ID.12.1034	ID.12
1800	6.53525	3	wild	0.523448	ID.37.1800	ID.37
1804	4.87064	1	wild	0.164365	ID.19.1804	ID.19
1804	4.87064	1	wild	0.164365	ID.19.1804	ID.19
1804	4.87064	2	wild	0.164365	ID.19.1804	ID.19
1816	2.29706	1	wild	-0.753657	ID.5.1816	ID.5
1828	4.89254	1	wild	0.169845	ID.19.1828	ID.19
1828	4.89254	1	wild	0.169845	ID.19.1828	ID.19
1150	1.58248	1	wild	-1.20881	ID.19.1150	ID.19
1150	1.58248	1	wild	-1.20881	ID.19.1150	ID.19
1150	1.58248	2	wild	-1.20881	ID.19.1150	ID.19
1150	1.58248	1	wild	-1.20881	ID.19.1150	ID.19
1150	1.58248	2	wild	-1.20881	ID.19.1150	ID.19
1150	1.58248	2	wild	-1.20881	ID.19.1150	ID.19
1150	1.58248	2	wild	-1.20881	ID.19.1150	ID.19
1150	1.58248	2	wild	-1.20881	ID.19.1150	ID.19
1150	1.58248	1	wild	-1.20881	ID.19.1150	ID.19
1150	1.58248	1	wild	-1.20881	ID.19.1150	ID.19
1150	1.58248	1	wild	-1.20881	ID.19.1150	ID.19
1150	1.58248	1	wild	-1.20881	ID.19.1150	ID.19
1150	1.58248	1	wild	-1.20881	ID.19.1150	ID.19
1150	1.58248	1	wild	-1.20881	ID.19.1150	ID.19
1150	1.58248	2	wild	-1.20881	ID.19.1150	ID.19
1150	1.58248	1	wild	-1.20881	ID.19.1150	ID.19
1150	1.58248	3	wild	-1.20881	ID.19.1150	ID.19
1150	1.58248	2	wild	-1.20881	ID.19.1150	ID.19
1150	1.58248	1	wild	-1.20881	ID.19.1150	ID.19
1150	1.58248	1	wild	-1.20881	ID.19.1150	ID.19
1150	1.58248	1	wild	-1.20881	ID.19.1150	ID.19
1150	1.58248	2	wild	-1.20881	ID.19.1150	ID.19
1150	1.58248	2	wild	-1.20881	ID.19.1150	ID.19
1150	1.58248	2	wild	-1.20881	ID.19.1150	ID.19
1150	1.58248	1	wild	-1.20881	ID.19.1150	ID.19
1150	1.58248	1	wild	-1.20881	ID.19.1150	ID.19
1150	1.58248	1	wild	-1.20881	ID.19.1150	ID.19
1150	1.58248	1	wild	-1.20881	ID.19.1150	ID.19
1150	1.58248	1	wild	-1.20881	ID.19.1150	ID.19
1150	1.58248	1	wild	-1.20881	ID.19.1150	ID.19
1150	1.58248	1	wild	-1.20881	ID.19.1150	ID.19
1150	1.58248	2	wild	-1.20881	ID.19.1150	ID.19
1150	1.58248	2	wild	-1.20881	ID.19.1150	ID.19
1150	1.58248	1	wild	-1.20881	ID.19.1150	ID.19
1150	1.58248	2	wild	-1.20881	ID.19.1150	ID.19
1150	1.58248	2	wild	-1.20881	ID.19.1150	ID.19
1150	1.58248	2	wild	-1.20881	ID.19.1150	ID.19
1150	1.58248	2	wild	-1.20881	ID.19.1150	ID.19
1150	1.58248	2	wild	-1.20881	ID.19.1150	ID.19
1150	1.58248	3	wild	-1.20881	ID.19.1150	ID.19
1150	1.58248	1	wild	-1.20881	ID.19.1150	ID.19
1150	1.58248	1	wild	-1.20881	ID.19.1150	ID.19
1150	1.58248	2	wild	-1.20881	ID.19.1150	ID.19
1150	1.58248	2	wild	-1.20881	ID.19.1150	ID.19
1150	1.58248	2	wild	-1.20881	ID.19.1150	ID.19
1150	1.58248	2	wild	-1.20881	ID.19.1150	ID.19
1150	1.58248	1	wild	-1.20881	ID.19.1150	ID.19
1150	1.58248	2	wild	-1.20881	ID.19.1150	ID.19
1150	1.58248	1	wild	-1.20881	ID.19.1150	ID.19
1150	1.58248	2	wild	-1.20881	ID.19.1150	ID.19
1150	1.58248	1	wild	-1.20881	ID.19.1150	ID.19
1150	1.58248	2	wild	-1.20881	ID.19.1150	ID.19
1150	1.58248	2	wild	-1.20881	ID.19.1150	ID.19
1150	1.58248	2	wild	-1.20881	ID.19.1150	ID.19
1150	1.58248	2	wild	-1.20881	ID.19.1150	ID.19
1150	1.58248	1	wild	-1.20881	ID.19.1150	ID.19
1150	1.58248	2	wild	-1.20881	ID.19.1150	ID.19
1150	1.58248	2	wild	-1.20881	ID.19.1150	ID.19
1150	1.58248	3	wild	-1.20881	ID.19.1150	ID.19
1150	1.58248	2	wild	-1.20881	ID.19.1150	ID.19
1150	1.58248	1	wild	-1.20881	ID.19.1150	ID.19
1150	1.58248	1	wild	-1.20881	ID.19.1150	ID.19
1150	1.58248	1	wild	-1.20881	ID.19.1150	ID.19
1150	1.58248	1	wild	-1.20881	ID.19.1150	ID.19
1150	1.58248	2	wild	-1.20881	ID.19.1150	ID.19
1150	1.58248	1	wild	-1.20881	ID.19.1150	ID.19
1150	1.58248	3	wild	-1.20881	ID.19.1150	ID.19
1150	1.58248	2	wild	-1.20881	ID.19.1150	ID.19
1150	1.58248	2	wild	-1.20881	ID.19.1150	ID.19
1150	1.58248	1	wild	-1.20881	ID.19.1150	ID.19
1150	1.58248	2	wild	-1.20881	ID.19.1150	ID.19
1150	1.58248	1	wild	-1.20881	ID.19.1150	ID.19
1150	1.58248	1	wild	-1.20881	ID.19.1150	ID.19
1153	1.58522	3	wild	-1.2067	ID.19.1153	ID.19
1153	1.58522	3	wild	-1.2067	ID.19.1153	ID.19
1153	1.58522	3	wild	-1.2067	ID.19.1153	ID.19
1153	1.58522	1	wild	-1.2067	ID.19.1153	ID.19
1153	1.58522	3	wild	-1.2067	ID.19.1153	ID.19
1153	1.58522	1	wild	-1.2067	ID.19.1153	ID.19
1153	1.58522	3	wild	-1.2067	ID.19.1153	ID.19
1153	1.58522	1	wild	-1.2067	ID.19.1153	ID.19
1153	1.58522	2	wild	-1.2067	ID.19.1153	ID.19
1153	1.58522	1	wild	-1.2067	ID.19.1153	ID.19
1153	1.58522	3	wild	-1.2067	ID.19.1153	ID.19
1153	1.58522	2	wild	-1.2067	ID.19.1153	ID.19
1153	1.58522	1	wild	-1.2067	ID.19.1153	ID.19
1153	1.58522	2	wild	-1.2067	ID.19.1153	ID.19
1153	1.58522	1	wild	-1.2067	ID.19.1153	ID.19
1153	1.58522	1	wild	-1.2067	ID.19.1153	ID.19
1153	1.58522	1	wild	-1.2067	ID.19.1153	ID.19
1153	1.58522	1	wild	-1.2067	ID.19.1153	ID.19
1153	1.58522	1	wild	-1.2067	ID.19.1153	ID.19
1153	1.58522	2	wild	-1.2067	ID.19.1153	ID.19
1153	1.58522	1	wild	-1.2067	ID.19.1153	ID.19
1153	1.58522	2	wild	-1.2067	ID.19.1153	ID.19
1153	1.58522	2	wild	-1.2067	ID.19.1153	ID.19
1153	1.58522	1	wild	-1.2067	ID.19.1153	ID.19
1153	1.58522	1	wild	-1.2067	ID.19.1153	ID.19
1153	1.58522	2	wild	-1.2067	ID.19.1153	ID.19
1153	1.58522	2	wild	-1.2067	ID.19.1153	ID.19
1153	1.58522	3	wild	-1.2067	ID.19.1153	ID.19
1153	1.58522	3	wild	-1.2067	ID.19.1153	ID.19
1153	1.58522	1	wild	-1.2067	ID.19.1153	ID.19
1153	1.58522	1	wild	-1.2067	ID.19.1153	ID.19
1153	1.58522	1	wild	-1.2067	ID.19.1153	ID.19
1153	1.58522	1	wild	-1.2067	ID.19.1153	ID.19
1153	1.58522	1	wild	-1.2067	ID.19.1153	ID.19
1153	1.58522	1	wild	-1.2067	ID.19.1153	ID.19
1153	1.58522	1	wild	-1.2067	ID.19.1153	ID.19
1153	1.58522	1	wild	-1.2067	ID.19.1153	ID.19
1153	1.58522	3	wild	-1.2067	ID.19.1153	ID.19
1153	1.58522	1	wild	-1.2067	ID.19.1153	ID.19
1153	1.58522	1	wild	-1.2067	ID.19.1153	ID.19
1153	1.58522	1	wild	-1.2067	ID.19.1153	ID.19
1153	1.58522	1	wild	-1.2067	ID.19.1153	ID.19
1153	1.58522	1	wild	-1.2067	ID.19.1153	ID.19
1153	1.58522	1	wild	-1.2067	ID.19.1153	ID.19
1153	1.58522	1	wild	-1.2067	ID.19.1153	ID.19
1153	1.58522	1	wild	-1.2067	ID.19.1153	ID.19
1153	1.58522	1	wild	-1.2067	ID.19.1153	ID.19
1153	1.58522	2	wild	-1.2067	ID.19.1153	ID.19
1153	1.58522	1	wild	-1.2067	ID.19.1153	ID.19
1153	1.58522	2	wild	-1.2067	ID.19.1153	ID.19
1153	1.58522	2	wild	-1.2067	ID.19.1153	ID.19
1153	1.58522	2	wild	-1.2067	ID.19.1153	ID.19
1153	1.58522	2	wild	-1.2067	ID.19.1153	ID.19
1153	1.58522	1	wild	-1.2067	ID.19.1153	ID.19
1153	1.58522	1	wild	-1.2067	ID.19.1153	ID.19
1153	1.58522	1	wild	-1.2067	ID.19.1153	ID.19
1153	1.58522	1	wild	-1.2067	ID.19.1153	ID.19
1153	1.58522	2	wild	-1.2067	ID.19.1153	ID.19
1153	1.58522	2	wild	-1.2067	ID.19.1153	ID.19
1153	1.58522	4	wild	-1.2067	ID.19.1153	ID.19
1153	1.58522	3	wild	-1.2067	ID.19.1153	ID.19
1153	1.58522	2	wild	-1.2067	ID.19.1153	ID.19
1153	1.58522	3	wild	-1.2067	ID.19.1153	ID.19
1153	1.58522	1	wild	-1.2067	ID.19.1153	ID.19
1153	1.58522	3	wild	-1.2067	ID.19.1153	ID.19
1153	1.58522	4	wild	-1.2067	ID.19.1153	ID.19
1153	1.58522	2	wild	-1.2067	ID.19.1153	ID.19
1153	1.58522	3	wild	-1.2067	ID.19.1153	ID.19
1153	1.58522	3	wild	-1.2067	ID.19.1153	ID.19
1153	1.58522	2	wild	-1.2067	ID.19.1153	ID.19
1153	1.58522	2	wild	-1.2067	ID.19.1153	ID.19
1153	1.58522	3	wild	-1.2067	ID.19.1153	ID.19
1158	1.59069	2	wild	-1.20248	ID.19.1158	ID.19
1158	1.59069	1	wild	-1.20248	ID.19.1158	ID.19
1158	1.59069	2	wild	-1.20248	ID.19.1158	ID.19
1158	1.59069	1	wild	-1.20248	ID.19.1158	ID.19
1158	1.59069	2	wild	-1.20248	ID.19.1158	ID.19
1158	1.59069	2	wild	-1.20248	ID.19.1158	ID.19
1158	1.59069	2	wild	-1.20248	ID.19.1158	ID.19
1158	1.59069	2	wild	-1.20248	ID.19.1158	ID.19
1158	1.59069	2	wild	-1.20248	ID.19.1158	ID.19
1158	1.59069	2	wild	-1.20248	ID.19.1158	ID.19
1158	1.59069	3	wild	-1.20248	ID.19.1158	ID.19
1158	1.59069	3	wild	-1.20248	ID.19.1158	ID.19
1158	1.59069	3	wild	-1.20248	ID.19.1158	ID.19
1158	1.59069	3	wild	-1.20248	ID.19.1158	ID.19
1158	1.59069	2	wild	-1.20248	ID.19.1158	ID.19
1158	1.59069	2	wild	-1.20248	ID.19.1158	ID.19
1158	1.59069	3	wild	-1.20248	ID.19.1158	ID.19
1158	1.59069	2	wild	-1.20248	ID.19.1158	ID.19
1158	1.59069	2	wild	-1.20248	ID.19.1158	ID.19
1158	1.59069	2	wild	-1.20248	ID.19.1158	ID.19
1158	1.59069	2	wild	-1.20248	ID.19.1158	ID.19
1158	1.59069	1	wild	-1.20248	ID.19.1158	ID.19
1158	1.59069	3	wild	-1.20248	ID.19.1158	ID.19
1158	1.59069	1	wild	-1.20248	ID.19.1158	ID.19
1158	1.59069	2	wild	-1.20248	ID.19.1158	ID.19
1158	1.59069	2	wild	-1.20248	ID.19.1158	ID.19
1158	1.59069	2	wild	-1.20248	ID.19.1158	ID.19
1158	1.59069	2	wild	-1.20248	ID.19.1158	ID.19
1158	1.59069	1	wild	-1.20248	ID.19.1158	ID.19
1158	1.59069	2	wild	-1.20248	ID.19.1158	ID.19
1158	1.59069	2	wild	-1.20248	ID.19.1158	ID.19
1158	1.59069	1	wild	-1.20248	ID.19.1158	ID.19
1158	1.59069	1	wild	-1.20248	ID.19.1158	ID.19
1158	1.59069	1	wild	-1.20248	ID.19.1158	ID.19
1158	1.59069	1	wild	-1.20248	ID.19.1158	ID.19
1158	1.59069	1	wild	-1.20248	ID.19.1158	ID.19
1158	1.59069	1	wild	-1.20248	ID.19.1158	ID.19
1158	1.59069	1	wild	-1.20248	ID.19.1158	ID.19
1158	1.59069	2	wild	-1.20248	ID.19.1158	ID.19
1158	1.59069	2	wild	-1.20248	ID.19.1158	ID.19
1158	1.59069	1	wild	-1.20248	ID.19.1158	ID.19
1158	1.59069	2	wild	-1.20248	ID.19.1158	ID.19
1158	1.59069	1	wild	-1.20248	ID.19.1158	ID.19
1158	1.59069	1	wild	-1.20248	ID.19.1158	ID.19
1158	1.59069	1	wild	-1.20248	ID.19.1158	ID.19
1158	1.59069	1	wild	-1.20248	ID.19.1158	ID.19
1158	1.59069	1	wild	-1.20248	ID.19.1158	ID.19
1158	1.59069	2	wild	-1.20248	ID.19.1158	ID.19
1160	1.59343	2	wild	-1.20038	ID.19.1160	ID.19
1160	1.59343	2	wild	-1.20038	ID.19.1160	ID.19
1160	1.59343	1	wild	-1.20038	ID.19.1160	ID.19
1160	1.59343	1	wild	-1.20038	ID.19.1160	ID.19
1160	1.59343	1	wild	-1.20038	ID.19.1160	ID.19
1160	1.59343	1	wild	-1.20038	ID.19.1160	ID.19
1160	1.59343	1	wild	-1.20038	ID.19.1160	ID.19
1160	1.59343	3	wild	-1.20038	ID.19.1160	ID.19
1160	1.59343	3	wild	-1.20038	ID.19.1160	ID.19
1160	1.59343	1	wild	-1.20038	ID.19.1160	ID.19
1160	1.59343	1	wild	-1.20038	ID.19.1160	ID.19
1160	1.59343	2	wild	-1.20038	ID.19.1160	ID.19
1160	1.59343	1	wild	-1.20038	ID.19.1160	ID.19
1160	1.59343	1	wild	-1.20038	ID.19.1160	ID.19
1160	1.59343	1	wild	-1.20038	ID.19.1160	ID.19
1160	1.59343	1	wild	-1.20038	ID.19.1160	ID.19
1160	1.59343	1	wild	-1.20038	ID.19.1160	ID.19
1160	1.59343	2	wild	-1.20038	ID.19.1160	ID.19
1160	1.59343	1	wild	-1.20038	ID.19.1160	ID.19
1160	1.59343	1	wild	-1.20038	ID.19.1160	ID.19
1160	1.59343	2	wild	-1.20038	ID.19.1160	ID.19
1160	1.59343	1	wild	-1.20038	ID.19.1160	ID.19
1160	1.59343	1	wild	-1.20038	ID.19.1160	ID.19
1160	1.59343	2	wild	-1.20038	ID.19.1160	ID.19
1160	1.59343	1	wild	-1.20038	ID.19.1160	ID.19
1160	1.59343	2	wild	-1.20038	ID.19.1160	ID.19
1160	1.59343	2	wild	-1.20038	ID.19.1160	ID.19
1160	1.59343	1	wild	-1.20038	ID.19.1160	ID.19
1160	1.59343	2	wild	-1.20038	ID.19.1160	ID.19
1160	1.59343	1	wild	-1.20038	ID.19.1160	ID.19
1160	1.59343	1	wild	-1.20038	ID.19.1160	ID.19
1160	1.59343	3	wild	-1.20038	ID.19.1160	ID.19
1160	1.59343	2	wild	-1.20038	ID.19.1160	ID.19
1160	1.59343	1	wild	-1.20038	ID.19.1160	ID.19
1160	1.59343	1	wild	-1.20038	ID.19.1160	ID.19
1160	1.59343	2	wild	-1.20038	ID.19.1160	ID.19
1160	1.59343	1	wild	-1.20038	ID.19.1160	ID.19
1160	1.59343	2	wild	-1.20038	ID.19.1160	ID.19
1160	1.59343	1	wild	-1.20038	ID.19.1160	ID.19
1160	1.59343	1	wild	-1.20038	ID.19.1160	ID.19
1160	1.59343	1	wild	-1.20038	ID.19.1160	ID.19
1160	1.59343	2	wild	-1.20038	ID.19.1160	ID.19
1160	1.59343	1	wild	-1.20038	ID.19.1160	ID.19
1160	1.59343	1	wild	-1.20038	ID.19.1160	ID.19
1160	1.59343	2	wild	-1.20038	ID.19.1160	ID.19
1160	1.59343	4	wild	-1.20038	ID.19.1160	ID.19
1160	1.59343	2	wild	-1.20038	ID.19.1160	ID.19
1160	1.59343	1	wild	-1.20038	ID.19.1160	ID.19
1160	1.59343	1	wild	-1.20038	ID.19.1160	ID.19
1160	1.59343	2	wild	-1.20038	ID.19.1160	ID.19
1160	1.59343	1	wild	-1.20038	ID.19.1160	ID.19
1160	1.59343	2	wild	-1.20038	ID.19.1160	ID.19
1160	1.59343	3	wild	-1.20038	ID.19.1160	ID.19
1160	1.59343	1	wild	-1.20038	ID.19.1160	ID.19
1160	1.59343	1	wild	-1.20038	ID.19.1160	ID.19
1160	1.59343	2	wild	-1.20038	ID.19.1160	ID.19
1160	1.59343	2	wild	-1.20038	ID.19.1160	ID.19
1160	1.59343	2	wild	-1.20038	ID.19.1160	ID.19
1160	1.59343	2	wild	-1.20038	ID.19.1160	ID.19
1160	1.59343	2	wild	-1.20038	ID.19.1160	ID.19
1160	1.59343	3	wild	-1.20038	ID.19.1160	ID.19
1160	1.59343	2	wild	-1.20038	ID.19.1160	ID.19
1160	1.59343	3	wild	-1.20038	ID.19.1160	ID.19
1160	1.59343	1	wild	-1.20038	ID.19.1160	ID.19
1160	1.59343	2	wild	-1.20038	ID.19.1160	ID.19
1160	1.59343	1	wild	-1.20038	ID.19.1160	ID.19
1160	1.59343	1	wild	-1.20038	ID.19.1160	ID.19
1160	1.59343	1	wild	-1.20038	ID.19.1160	ID.19
1160	1.59343	1	wild	-1.20038	ID.19.1160	ID.19
1160	1.59343	1	wild	-1.20038	ID.19.1160	ID.19
1160	1.59343	1	wild	-1.20038	ID.19.1160	ID.19
1188	12.7502	2	wild	1.33977	ID.22.1188	ID.22
1194	1.36071	2	wild	-1.39322	ID.12.1194	ID.12
1194	1.36071	1	wild	-1.39322	ID.12.1194	ID.12
1194	1.36071	1	wild	-1.39322	ID.12.1194	ID.12
1194	1.36071	1	wild	-1.39322	ID.12.1194	ID.12
1194	1.36071	1	wild	-1.39322	ID.12.1194	ID.12
1194	1.36071	1	wild	-1.39322	ID.12.1194	ID.12
1194	1.36071	2	wild	-1.39322	ID.12.1194	ID.12
1194	1.36071	2	wild	-1.39322	ID.12.1194	ID.12
1194	1.36071	1	wild	-1.39322	ID.12.1194	ID.12
1194	1.36071	2	wild	-1.39322	ID.12.1194	ID.12
1194	1.36071	2	wild	-1.39322	ID.12.1194	ID.12
1194	1.36071	1	wild	-1.39322	ID.12.1194	ID.12
1194	1.36071	2	wild	-1.39322	ID.12.1194	ID.12
1194	1.36071	4	wild	-1.39322	ID.12.1194	ID.12
1194	1.36071	1	wild	-1.39322	ID.12.1194	ID.12
1194	1.36071	1	wild	-1.39322	ID.12.1194	ID.12
1194	1.36071	1	wild	-1.39322	ID.12.1194	ID.12
1194	1.36071	1	wild	-1.39322	ID.12.1194	ID.12
1194	1.36071	2	wild	-1.39322	ID.12.1194	ID.12
1194	1.36071	2	wild	-1.39322	ID.12.1194	ID.12
1194	1.36071	2	wild	-1.39322	ID.12.1194	ID.12
1194	1.36071	2	wild	-1.39322	ID.12.1194	ID.12
1194	1.36071	2	wild	-1.39322	ID.12.1194	ID.12
1194	1.36071	1	wild	-1.39322	ID.12.1194	ID.12
1194	1.36071	1	wild	-1.39322	ID.12.1194	ID.12
1194	1.36071	1	wild	-1.39322	ID.12.1194	ID.12
1194	1.36071	2	wild	-1.39322	ID.12.1194	ID.12
1194	1.36071	2	wild	-1.39322	ID.12.1194	ID.12
1194	1.36071	1	wild	-1.39322	ID.12.1194	ID.12
1194	1.36071	1	wild	-1.39322	ID.12.1194	ID.12
1194	1.36071	1	wild	-1.39322	ID.12.1194	ID.12
1194	1.36071	2	wild	-1.39322	ID.12.1194	ID.12
1194	1.36071	3	wild	-1.39322	ID.12.1194	ID.12
1194	1.36071	4	wild	-1.39322	ID.12.1194	ID.12
1194	1.36071	4	wild	-1.39322	ID.12.1194	ID.12
1194	1.36071	4	wild	-1.39322	ID.12.1194	ID.12
1194	1.36071	4	wild	-1.39322	ID.12.1194	ID.12
1194	1.36071	4	wild	-1.39322	ID.12.1194	ID.12
1194	1.36071	2	wild	-1.39322	ID.12.1194	ID.12
1194	1.36071	2	wild	-1.39322	ID.12.1194	ID.12
1194	1.36071	2	wild	-1.39322	ID.12.1194	ID.12
1194	1.36071	2	wild	-1.39322	ID.12.1194	ID.12
1194	1.36071	1	wild	-1.39322	ID.12.1194	ID.12
1194	1.36071	2	wild	-1.39322	ID.12.1194	ID.12
1211	0.91718	1	wild	-1.87503	ID.7.1211	ID.7
1211	0.91718	1	wild	-1.87503	ID.7.1211	ID.7
1211	0.91718	1	wild	-1.87503	ID.7.1211	ID.7
1211	0.91718	3	wild	-1.87503	ID.7.1211	ID.7
1211	0.91718	1	wild	-1.87503	ID.7.1211	ID.7
1211	0.91718	1	wild	-1.87503	ID.7.1211	ID.7
1211	0.91718	1	wild	-1.87503	ID.7.1211	ID.7
1211	0.91718	1	wild	-1.87503	ID.7.1211	ID.7
1211	0.91718	2	wild	-1.87503	ID.7.1211	ID.7
1211	0.91718	2	wild	-1.87503	ID.7.1211	ID.7
1211	0.91718	2	wild	-1.87503	ID.7.1211	ID.7
1211	0.91718	2	wild	-1.87503	ID.7.1211	ID.7
1211	0.91718	4	wild	-1.87503	ID.7.1211	ID.7
1211	0.91718	4	wild	-1.87503	ID.7.1211	ID.7
1211	0.91718	2	wild	-1.87503	ID.7.1211	ID.7
1211	0.91718	2	wild	-1.87503	ID.7.1211	ID.7
1211	0.91718	2	wild	-1.87503	ID.7.1211	ID.7
1211	0.91718	3	wild	-1.87503	ID.7.1211	ID.7
1211	0.91718	2	wild	-1.87503	ID.7.1211	ID.7
1211	0.91718	2	wild	-1.87503	ID.7.1211	ID.7
1211	0.91718	2	wild	-1.87503	ID.7.1211	ID.7
1211	0.91718	2	wild	-1.87503	ID.7.1211	ID.7
1211	0.91718	3	wild	-1.87503	ID.7.1211	ID.7
1211	0.91718	2	wild	-1.87503	ID.7.1211	ID.7
1211	0.91718	3	wild	-1.87503	ID.7.1211	ID.7
1211	0.91718	4	wild	-1.87503	ID.7.1211	ID.7
1211	0.91718	2	wild	-1.87503	ID.7.1211	ID.7
1211	0.91718	1	wild	-1.87503	ID.7.1211	ID.7
1211	0.91718	1	wild	-1.87503	ID.7.1211	ID.7
1211	0.91718	1	wild	-1.87503	ID.7.1211	ID.7
1211	0.91718	2	wild	-1.87503	ID.7.1211	ID.7
1211	0.91718	2	wild	-1.87503	ID.7.1211	ID.7
1211	0.91718	1	wild	-1.87503	ID.7.1211	ID.7
1211	0.91718	1	wild	-1.87503	ID.7.1211	ID.7
1211	0.91718	2	wild	-1.87503	ID.7.1211	ID.7
1211	0.91718	1	wild	-1.87503	ID.7.1211	ID.7
1211	0.91718	1	wild	-1.87503	ID.7.1211	ID.7
1211	0.91718	3	wild	-1.87503	ID.7.1211	ID.7
1211	0.91718	1	wild	-1.87503	ID.7.1211	ID.7
1211	0.91718	1	wild	-1.87503	ID.7.1211	ID.7
1211	0.91718	2	wild	-1.87503	ID.7.1211	ID.7
1211	0.91718	2	wild	-1.87503	ID.7.1211	ID.7
1211	0.91718	2	wild	-1.87503	ID.7.1211	ID.7
1211	0.91718	1	wild	-1.87503	ID.7.1211	ID.7
1211	0.91718	2	wild	-1.87503	ID.7.1211	ID.7
1211	0.91718	1	wild	-1.87503	ID.7.1211	ID.7
1211	0.91718	1	wild	-1.87503	ID.7.1211	ID.7
1213	0.919918	1	wild	-1.87139	ID.7.1213	ID.7
1213	0.919918	2	wild	-1.87139	ID.7.1213	ID.7
1213	0.919918	1	wild	-1.87139	ID.7.1213	ID.7
1213	0.919918	1	wild	-1.87139	ID.7.1213	ID.7
1213	0.919918	1	wild	-1.87139	ID.7.1213	ID.7
1213	0.919918	1	wild	-1.87139	ID.7.1213	ID.7
1213	0.919918	2	wild	-1.87139	ID.7.1213	ID.7
1213	0.919918	1	wild	-1.87139	ID.7.1213	ID.7
1213	0.919918	1	wild	-1.87139	ID.7.1213	ID.7
1213	0.919918	1	wild	-1.87139	ID.7.1213	ID.7
1213	0.919918	1	wild	-1.87139	ID.7.1213	ID.7
1213	0.919918	2	wild	-1.87139	ID.7.1213	ID.7
1213	0.919918	1	wild	-1.87139	ID.7.1213	ID.7
1213	0.919918	1	wild	-1.87139	ID.7.1213	ID.7
1213	0.919918	1	wild	-1.87139	ID.7.1213	ID.7
1213	0.919918	1	wild	-1.87139	ID.7.1213	ID.7
1213	0.919918	2	wild	-1.87139	ID.7.1213	ID.7
1213	0.919918	1	wild	-1.87139	ID.7.1213	ID.7
1213	0.919918	2	wild	-1.87139	ID.7.1213	ID.7
1213	0.919918	2	wild	-1.87139	ID.7.1213	ID.7
1213	0.919918	1	wild	-1.87139	ID.7.1213	ID.7
1213	0.919918	1	wild	-1.87139	ID.7.1213	ID.7
1213	0.919918	1	wild	-1.87139	ID.7.1213	ID.7
1213	0.919918	2	wild	-1.87139	ID.7.1213	ID.7
1213	0.919918	1	wild	-1.87139	ID.7.1213	ID.7
1213	0.919918	1	wild	-1.87139	ID.7.1213	ID.7
1213	0.919918	2	wild	-1.87139	ID.7.1213	ID.7
1213	0.919918	1	wild	-1.87139	ID.7.1213	ID.7
1213	0.919918	2	wild	-1.87139	ID.7.1213	ID.7
1213	0.919918	2	wild	-1.87139	ID.7.1213	ID.7
1213	0.919918	1	wild	-1.87139	ID.7.1213	ID.7
1213	0.919918	3	wild	-1.87139	ID.7.1213	ID.7
1213	0.919918	1	wild	-1.87139	ID.7.1213	ID.7
1213	0.919918	2	wild	-1.87139	ID.7.1213	ID.7
1213	0.919918	1	wild	-1.87139	ID.7.1213	ID.7
1213	0.919918	2	wild	-1.87139	ID.7.1213	ID.7
1213	0.919918	1	wild	-1.87139	ID.7.1213	ID.7
1213	0.919918	1	wild	-1.87139	ID.7.1213	ID.7
1213	0.919918	2	wild	-1.87139	ID.7.1213	ID.7
1213	0.919918	1	wild	-1.87139	ID.7.1213	ID.7
1213	0.919918	1	wild	-1.87139	ID.7.1213	ID.7
1213	0.919918	1	wild	-1.87139	ID.7.1213	ID.7
1213	0.919918	1	wild	-1.87139	ID.7.1213	ID.7
1213	0.919918	2	wild	-1.87139	ID.7.1213	ID.7
1213	0.919918	2	wild	-1.87139	ID.7.1213	ID.7
1213	0.919918	1	wild	-1.87139	ID.7.1213	ID.7
1213	0.919918	2	wild	-1.87139	ID.7.1213	ID.7
1213	0.919918	2	wild	-1.87139	ID.7.1213	ID.7
1213	0.919918	1	wild	-1.87139	ID.7.1213	ID.7
1213	0.919918	3	wild	-1.87139	ID.7.1213	ID.7
1213	0.919918	1	wild	-1.87139	ID.7.1213	ID.7
1213	0.919918	1	wild	-1.87139	ID.7.1213	ID.7
1213	0.919918	1	wild	-1.87139	ID.7.1213	ID.7
1213	0.919918	2	wild	-1.87139	ID.7.1213	ID.7
1213	0.919918	1	wild	-1.87139	ID.7.1213	ID.7
1213	0.919918	1	wild	-1.87139	ID.7.1213	ID.7
1213	0.919918	1	wild	-1.87139	ID.7.1213	ID.7
1213	0.919918	1	wild	-1.87139	ID.7.1213	ID.7
1213	0.919918	2	wild	-1.87139	ID.7.1213	ID.7
1213	0.919918	1	wild	-1.87139	ID.7.1213	ID.7
1213	0.919918	3	wild	-1.87139	ID.7.1213	ID.7
1213	0.919918	1	wild	-1.87139	ID.7.1213	ID.7
1213	0.919918	2	wild	-1.87139	ID.7.1213	ID.7
1213	0.919918	1	wild	-1.87139	ID.7.1213	ID.7
1213	0.919918	1	wild	-1.87139	ID.7.1213	ID.7
1213	0.919918	2	wild	-1.87139	ID.7.1213	ID.7
1213	0.919918	1	wild	-1.87139	ID.7.1213	ID.7
1213	0.919918	1	wild	-1.87139	ID.7.1213	ID.7
1213	0.919918	1	wild	-1.87139	ID.7.1213	ID.7
1213	0.919918	3	wild	-1.87139	ID.7.1213	ID.7
1213	0.919918	3	wild	-1.87139	ID.7.1213	ID.7
1213	0.919918	3	wild	-1.87139	ID.7.1213	ID.7
1213	0.919918	2	wild	-1.87139	ID.7.1213	ID.7
1213	0.919918	2	wild	-1.87139	ID.7.1213	ID.7
1213	0.919918	1	wild	-1.87139	ID.7.1213	ID.7
1213	0.919918	3	wild	-1.87139	ID.7.1213	ID.7
1213	0.919918	2	wild	-1.87139	ID.7.1213	ID.7
1213	0.919918	2	wild	-1.87139	ID.7.1213	ID.7
1213	0.919918	1	wild	-1.87139	ID.7.1213	ID.7
1213	0.919918	2	wild	-1.87139	ID.7.1213	ID.7
1213	0.919918	1	wild	-1.87139	ID.7.1213	ID.7
1213	0.919918	1	wild	-1.87139	ID.7.1213	ID.7
1213	0.919918	2	wild	-1.87139	ID.7.1213	ID.7
1213	0.919918	2	wild	-1.87139	ID.7.1213	ID.7
1213	0.919918	3	wild	-1.87139	ID.7.1213	ID.7
1213	0.919918	1	wild	-1.87139	ID.7.1213	ID.7
1213	0.919918	2	wild	-1.87139	ID.7.1213	ID.7
1213	0.919918	2	wild	-1.87139	ID.7.1213	ID.7
1213	0.919918	1	wild	-1.87139	ID.7.1213	ID.7
1213	0.919918	2	wild	-1.87139	ID.7.1213	ID.7
1213	0.919918	2	wild	-1.87139	ID.7.1213	ID.7
1217	0.925394	2	wild	-1.86414	ID.7.1217	ID.7
1217	0.925394	1	wild	-1.86414	ID.7.1217	ID.7
1217	0.925394	1	wild	-1.86414	ID.7.1217	ID.7
1217	0.925394	1	wild	-1.86414	ID.7.1217	ID.7
1217	0.925394	2	wild	-1.86414	ID.7.1217	ID.7
1217	0.925394	1	wild	-1.86414	ID.7.1217	ID.7
1217	0.925394	1	wild	-1.86414	ID.7.1217	ID.7
1217	0.925394	2	wild	-1.86414	ID.7.1217	ID.7
1217	0.925394	2	wild	-1.86414	ID.7.1217	ID.7
1217	0.925394	2	wild	-1.86414	ID.7.1217	ID.7
1217	0.925394	1	wild	-1.86414	ID.7.1217	ID.7
1217	0.925394	1	wild	-1.86414	ID.7.1217	ID.7
1217	0.925394	1	wild	-1.86414	ID.7.1217	ID.7
1217	0.925394	2	wild	-1.86414	ID.7.1217	ID.7
1217	0.925394	1	wild	-1.86414	ID.7.1217	ID.7
1217	0.925394	1	wild	-1.86414	ID.7.1217	ID.7
1217	0.925394	1	wild	-1.86414	ID.7.1217	ID.7
1217	0.925394	1	wild	-1.86414	ID.7.1217	ID.7
1217	0.925394	3	wild	-1.86414	ID.7.1217	ID.7
1217	0.925394	1	wild	-1.86414	ID.7.1217	ID.7
1217	0.925394	3	wild	-1.86414	ID.7.1217	ID.7
1217	0.925394	2	wild	-1.86414	ID.7.1217	ID.7
1217	0.925394	2	wild	-1.86414	ID.7.1217	ID.7
1217	0.925394	1	wild	-1.86414	ID.7.1217	ID.7
1217	0.925394	2	wild	-1.86414	ID.7.1217	ID.7
1217	0.925394	1	wild	-1.86414	ID.7.1217	ID.7
1217	0.925394	2	wild	-1.86414	ID.7.1217	ID.7
1217	0.925394	2	wild	-1.86414	ID.7.1217	ID.7
1217	0.925394	2	wild	-1.86414	ID.7.1217	ID.7
1217	0.925394	2	wild	-1.86414	ID.7.1217	ID.7
1217	0.925394	1	wild	-1.86414	ID.7.1217	ID.7
1217	0.925394	3	wild	-1.86414	ID.7.1217	ID.7
1217	0.925394	1	wild	-1.86414	ID.7.1217	ID.7
1217	0.925394	2	wild	-1.86414	ID.7.1217	ID.7
1217	0.925394	2	wild	-1.86414	ID.7.1217	ID.7
1217	0.925394	1	wild	-1.86414	ID.7.1217	ID.7
1217	0.925394	1	wild	-1.86414	ID.7.1217	ID.7
1217	0.925394	1	wild	-1.86414	ID.7.1217	ID.7
1217	0.925394	1	wild	-1.86414	ID.7.1217	ID.7
1217	0.925394	1	wild	-1.86414	ID.7.1217	ID.7
1217	0.925394	1	wild	-1.86414	ID.7.1217	ID.7
1217	0.925394	2	wild	-1.86414	ID.7.1217	ID.7
1217	0.925394	2	wild	-1.86414	ID.7.1217	ID.7
1217	0.925394	1	wild	-1.86414	ID.7.1217	ID.7
1217	0.925394	2	wild	-1.86414	ID.7.1217	ID.7
1217	0.925394	1	wild	-1.86414	ID.7.1217	ID.7
1217	0.925394	1	wild	-1.86414	ID.7.1217	ID.7
1217	0.925394	1	wild	-1.86414	ID.7.1217	ID.7
1217	0.925394	1	wild	-1.86414	ID.7.1217	ID.7
1217	0.925394	2	wild	-1.86414	ID.7.1217	ID.7
1217	0.925394	1	wild	-1.86414	ID.7.1217	ID.7
1217	0.925394	1	wild	-1.86414	ID.7.1217	ID.7
1217	0.925394	1	wild	-1.86414	ID.7.1217	ID.7
1217	0.925394	2	wild	-1.86414	ID.7.1217	ID.7
1217	0.925394	1	wild	-1.86414	ID.7.1217	ID.7
1217	0.925394	2	wild	-1.86414	ID.7.1217	ID.7
1217	0.925394	3	wild	-1.86414	ID.7.1217	ID.7
1217	0.925394	1	wild	-1.86414	ID.7.1217	ID.7
1217	0.925394	1	wild	-1.86414	ID.7.1217	ID.7
1217	0.925394	1	wild	-1.86414	ID.7.1217	ID.7
1217	0.925394	1	wild	-1.86414	ID.7.1217	ID.7
1217	0.925394	3	wild	-1.86414	ID.7.1217	ID.7
1217	0.925394	1	wild	-1.86414	ID.7.1217	ID.7
1217	0.925394	2	wild	-1.86414	ID.7.1217	ID.7
1217	0.925394	1	wild	-1.86414	ID.7.1217	ID.7
1217	0.925394	2	wild	-1.86414	ID.7.1217	ID.7
1217	0.925394	1	wild	-1.86414	ID.7.1217	ID.7
1217	0.925394	1	wild	-1.86414	ID.7.1217	ID.7
1217	0.925394	1	wild	-1.86414	ID.7.1217	ID.7
1217	0.925394	1	wild	-1.86414	ID.7.1217	ID.7
1217	0.925394	2	wild	-1.86414	ID.7.1217	ID.7
1217	0.925394	2	wild	-1.86414	ID.7.1217	ID.7
1217	0.925394	2	wild	-1.86414	ID.7.1217	ID.7
1217	0.925394	2	wild	-1.86414	ID.7.1217	ID.7
1217	0.925394	1	wild	-1.86414	ID.7.1217	ID.7
1217	0.925394	2	wild	-1.86414	ID.7.1217	ID.7
1217	0.925394	2	wild	-1.86414	ID.7.1217	ID.7
1217	0.925394	1	wild	-1.86414	ID.7.1217	ID.7
1217	0.925394	1	wild	-1.86414	ID.7.1217	ID.7
1217	0.925394	1	wild	-1.86414	ID.7.1217	ID.7
1217	0.925394	1	wild	-1.86414	ID.7.1217	ID.7
1217	0.925394	1	wild	-1.86414	ID.7.1217	ID.7
1217	0.925394	1	wild	-1.86414	ID.7.1217	ID.7
1217	0.925394	1	wild	-1.86414	ID.7.1217	ID.7
1217	0.925394	1	wild	-1.86414	ID.7.1217	ID.7
1217	0.925394	1	wild	-1.86414	ID.7.1217	ID.7
1217	0.925394	1	wild	-1.86414	ID.7.1217	ID.7
1217	0.925394	1	wild	-1.86414	ID.7.1217	ID.7
1217	0.925394	1	wild	-1.86414	ID.7.1217	ID.7
1217	0.925394	2	wild	-1.86414	ID.7.1217	ID.7
1217	0.925394	2	wild	-1.86414	ID.7.1217	ID.7
1219	0.928131	2	wild	-1.86053	ID.7.1219	ID.7
1219	0.928131	1	wild	-1.86053	ID.7.1219	ID.7
1219	0.928131	1	wild	-1.86053	ID.7.1219	ID.7
1219	0.928131	1	wild	-1.86053	ID.7.1219	ID.7
1219	0.928131	1	wild	-1.86053	ID.7.1219	ID.7
1219	0.928131	1	wild	-1.86053	ID.7.1219	ID.7
1219	0.928131	1	wild	-1.86053	ID.7.1219	ID.7
1219	0.928131	1	wild	-1.86053	ID.7.1219	ID.7
1219	0.928131	2	wild	-1.86053	ID.7.1219	ID.7
1219	0.928131	1	wild	-1.86053	ID.7.1219	ID.7
1219	0.928131	1	wild	-1.86053	ID.7.1219	ID.7
1219	0.928131	2	wild	-1.86053	ID.7.1219	ID.7
1219	0.928131	3	wild	-1.86053	ID.7.1219	ID.7
1219	0.928131	1	wild	-1.86053	ID.7.1219	ID.7
1219	0.928131	1	wild	-1.86053	ID.7.1219	ID.7
1219	0.928131	1	wild	-1.86053	ID.7.1219	ID.7
1219	0.928131	1	wild	-1.86053	ID.7.1219	ID.7
1219	0.928131	1	wild	-1.86053	ID.7.1219	ID.7
1219	0.928131	1	wild	-1.86053	ID.7.1219	ID.7
1219	0.928131	2	wild	-1.86053	ID.7.1219	ID.7
1219	0.928131	1	wild	-1.86053	ID.7.1219	ID.7
1219	0.928131	1	wild	-1.86053	ID.7.1219	ID.7
1219	0.928131	1	wild	-1.86053	ID.7.1219	ID.7
1219	0.928131	1	wild	-1.86053	ID.7.1219	ID.7
1219	0.928131	3	wild	-1.86053	ID.7.1219	ID.7
1219	0.928131	2	wild	-1.86053	ID.7.1219	ID.7
1219	0.928131	2	wild	-1.86053	ID.7.1219	ID.7
1219	0.928131	2	wild	-1.86053	ID.7.1219	ID.7
1219	0.928131	1	wild	-1.86053	ID.7.1219	ID.7
1219	0.928131	1	wild	-1.86053	ID.7.1219	ID.7
1219	0.928131	1	wild	-1.86053	ID.7.1219	ID.7
1219	0.928131	1	wild	-1.86053	ID.7.1219	ID.7
1219	0.928131	1	wild	-1.86053	ID.7.1219	ID.7
1219	0.928131	1	wild	-1.86053	ID.7.1219	ID.7
1219	0.928131	1	wild	-1.86053	ID.7.1219	ID.7
1219	0.928131	1	wild	-1.86053	ID.7.1219	ID.7
1219	0.928131	2	wild	-1.86053	ID.7.1219	ID.7
1219	0.928131	1	wild	-1.86053	ID.7.1219	ID.7
1219	0.928131	2	wild	-1.86053	ID.7.1219	ID.7
1219	0.928131	1	wild	-1.86053	ID.7.1219	ID.7
1219	0.928131	1	wild	-1.86053	ID.7.1219	ID.7
1219	0.928131	1	wild	-1.86053	ID.7.1219	ID.7
1219	0.928131	1	wild	-1.86053	ID.7.1219	ID.7
1219	0.928131	1	wild	-1.86053	ID.7.1219	ID.7
1219	0.928131	3	wild	-1.86053	ID.7.1219	ID.7
1219	0.928131	1	wild	-1.86053	ID.7.1219	ID.7
1219	0.928131	1	wild	-1.86053	ID.7.1219	ID.7
1219	0.928131	1	wild	-1.86053	ID.7.1219	ID.7
1219	0.928131	1	wild	-1.86053	ID.7.1219	ID.7
1219	0.928131	1	wild	-1.86053	ID.7.1219	ID.7
1219	0.928131	1	wild	-1.86053	ID.7.1219	ID.7
1219	0.928131	1	wild	-1.86053	ID.7.1219	ID.7
1219	0.928131	2	wild	-1.86053	ID.7.1219	ID.7
1219	0.928131	1	wild	-1.86053	ID.7.1219	ID.7
1219	0.928131	2	wild	-1.86053	ID.7.1219	ID.7
1219	0.928131	2	wild	-1.86053	ID.7.1219	ID.7
1219	0.928131	3	wild	-1.86053	ID.7.1219	ID.7
1219	0.928131	1	wild	-1.86053	ID.7.1219	ID.7
1219	0.928131	1	wild	-1.86053	ID.7.1219	ID.7
1219	0.928131	1	wild	-1.86053	ID.7.1219	ID.7
1219	0.928131	1	wild	-1.86053	ID.7.1219	ID.7
1219	0.928131	2	wild	-1.86053	ID.7.1219	ID.7
1219	0.928131	1	wild	-1.86053	ID.7.1219	ID.7
1219	0.928131	1	wild	-1.86053	ID.7.1219	ID.7
1219	0.928131	1	wild	-1.86053	ID.7.1219	ID.7
1219	0.928131	2	wild	-1.86053	ID.7.1219	ID.7
1219	0.928131	3	wild	-1.86053	ID.7.1219	ID.7
1219	0.928131	2	wild	-1.86053	ID.7.1219	ID.7
1219	0.928131	1	wild	-1.86053	ID.7.1219	ID.7
1219	0.928131	2	wild	-1.86053	ID.7.1219	ID.7
1219	0.928131	1	wild	-1.86053	ID.7.1219	ID.7
1219	0.928131	3	wild	-1.86053	ID.7.1219	ID.7
1219	0.928131	2	wild	-1.86053	ID.7.1219	ID.7
1219	0.928131	1	wild	-1.86053	ID.7.1219	ID.7
1219	0.928131	2	wild	-1.86053	ID.7.1219	ID.7
1219	0.928131	3	wild	-1.86053	ID.7.1219	ID.7
1219	0.928131	1	wild	-1.86053	ID.7.1219	ID.7
1219	0.928131	1	wild	-1.86053	ID.7.1219	ID.7
1219	0.928131	2	wild	-1.86053	ID.7.1219	ID.7
1219	0.928131	2	wild	-1.86053	ID.7.1219	ID.7
1219	0.928131	1	wild	-1.86053	ID.7.1219	ID.7
1219	0.928131	1	wild	-1.86053	ID.7.1219	ID.7
1219	0.928131	1	wild	-1.86053	ID.7.1219	ID.7
1219	0.928131	1	wild	-1.86053	ID.7.1219	ID.7
1219	0.928131	1	wild	-1.86053	ID.7.1219	ID.7
1219	0.928131	1	wild	-1.86053	ID.7.1219	ID.7
1219	0.928131	1	wild	-1.86053	ID.7.1219	ID.7
1219	0.928131	1	wild	-1.86053	ID.7.1219	ID.7
1219	0.928131	2	wild	-1.86053	ID.7.1219	ID.7
1219	0.928131	1	wild	-1.86053	ID.7.1219	ID.7
1219	0.928131	3	wild	-1.86053	ID.7.1219	ID.7
1219	0.928131	1	wild	-1.86053	ID.7.1219	ID.7
1219	0.928131	1	wild	-1.86053	ID.7.1219	ID.7
1256	3.55921	2	wild	-0.218782	ID.37.1256	ID.37
1256	3.55921	1	wild	-0.218782	ID.37.1256	ID.37
1256	3.55921	1	wild	-0.218782	ID.37.1256	ID.37
1256	3.55921	2	wild	-0.218782	ID.37.1256	ID.37
1256	3.55921	2	wild	-0.218782	ID.37.1256	ID.37
1256	3.55921	2	wild	-0.218782	ID.37.1256	ID.37
1256	3.55921	1	wild	-0.218782	ID.37.1256	ID.37
1256	3.55921	1	wild	-0.218782	ID.37.1256	ID.37
1256	3.55921	2	wild	-0.218782	ID.37.1256	ID.37
1256	3.55921	2	wild	-0.218782	ID.37.1256	ID.37
1256	3.55921	1	wild	-0.218782	ID.37.1256	ID.37
1256	3.55921	1	wild	-0.218782	ID.37.1256	ID.37
1256	3.55921	2	wild	-0.218782	ID.37.1256	ID.37
1256	3.55921	1	wild	-0.218782	ID.37.1256	ID.37
1256	3.55921	2	wild	-0.218782	ID.37.1256	ID.37
1256	3.55921	3	wild	-0.218782	ID.37.1256	ID.37
1256	3.55921	2	wild	-0.218782	ID.37.1256	ID.37
1256	3.55921	2	wild	-0.218782	ID.37.1256	ID.37
1256	3.55921	1	wild	-0.218782	ID.37.1256	ID.37
1256	3.55921	2	wild	-0.218782	ID.37.1256	ID.37
1256	3.55921	1	wild	-0.218782	ID.37.1256	ID.37
1256	3.55921	2	wild	-0.218782	ID.37.1256	ID.37
1256	3.55921	1	wild	-0.218782	ID.37.1256	ID.37
1256	3.55921	1	wild	-0.218782	ID.37.1256	ID.37
1256	3.55921	3	wild	-0.218782	ID.37.1256	ID.37
1256	3.55921	1	wild	-0.218782	ID.37.1256	ID.37
1256	3.55921	1	wild	-0.218782	ID.37.1256	ID.37
1256	3.55921	1	wild	-0.218782	ID.37.1256	ID.37
1256	3.55921	1	wild	-0.218782	ID.37.1256	ID.37
1256	3.55921	1	wild	-0.218782	ID.37.1256	ID.37
1256	3.55921	1	wild	-0.218782	ID.37.1256	ID.37
1290	3.62218	2	wild	-0.197361	ID.37.1290	ID.37
1290	3.62218	1	wild	-0.197361	ID.37.1290	ID.37
1290	3.62218	1	wild	-0.197361	ID.37.1290	ID.37
1290	3.62218	1	wild	-0.197361	ID.37.1290	ID.37
1290	3.62218	1	wild	-0.197361	ID.37.1290	ID.37
1290	3.62218	2	wild	-0.197361	ID.37.1290	ID.37
1290	3.62218	1	wild	-0.197361	ID.37.1290	ID.37
1290	3.62218	3	wild	-0.197361	ID.37.1290	ID.37
1290	3.62218	3	wild	-0.197361	ID.37.1290	ID.37
1290	3.62218	1	wild	-0.197361	ID.37.1290	ID.37
1290	3.62218	1	wild	-0.197361	ID.37.1290	ID.37
1290	3.62218	2	wild	-0.197361	ID.37.1290	ID.37
1290	3.62218	2	wild	-0.197361	ID.37.1290	ID.37
1290	3.62218	1	wild	-0.197361	ID.37.1290	ID.37
1290	3.62218	2	wild	-0.197361	ID.37.1290	ID.37
1290	3.62218	2	wild	-0.197361	ID.37.1290	ID.37
1290	3.62218	2	wild	-0.197361	ID.37.1290	ID.37
1290	3.62218	1	wild	-0.197361	ID.37.1290	ID.37
1290	3.62218	2	wild	-0.197361	ID.37.1290	ID.37
1290	3.62218	3	wild	-0.197361	ID.37.1290	ID.37
1290	3.62218	3	wild	-0.197361	ID.37.1290	ID.37
1290	3.62218	2	wild	-0.197361	ID.37.1290	ID.37
1290	3.62218	1	wild	-0.197361	ID.37.1290	ID.37
1290	3.62218	1	wild	-0.197361	ID.37.1290	ID.37
1290	3.62218	2	wild	-0.197361	ID.37.1290	ID.37
1290	3.62218	3	wild	-0.197361	ID.37.1290	ID.37
1290	3.62218	3	wild	-0.197361	ID.37.1290	ID.37
1290	3.62218	2	wild	-0.197361	ID.37.1290	ID.37
1290	3.62218	1	wild	-0.197361	ID.37.1290	ID.37
1290	3.62218	1	wild	-0.197361	ID.37.1290	ID.37
1290	3.62218	1	wild	-0.197361	ID.37.1290	ID.37
1290	3.62218	1	wild	-0.197361	ID.37.1290	ID.37
1290	3.62218	2	wild	-0.197361	ID.37.1290	ID.37
1290	3.62218	1	wild	-0.197361	ID.37.1290	ID.37
1290	3.62218	1	wild	-0.197361	ID.37.1290	ID.37
1290	3.62218	1	wild	-0.197361	ID.37.1290	ID.37
1290	3.62218	1	wild	-0.197361	ID.37.1290	ID.37
1290	3.62218	1	wild	-0.197361	ID.37.1290	ID.37
1290	3.62218	3	wild	-0.197361	ID.37.1290	ID.37
1290	3.62218	3	wild	-0.197361	ID.37.1290	ID.37
1290	3.62218	1	wild	-0.197361	ID.37.1290	ID.37
1290	3.62218	1	wild	-0.197361	ID.37.1290	ID.37
1290	3.62218	2	wild	-0.197361	ID.37.1290	ID.37
1290	3.62218	1	wild	-0.197361	ID.37.1290	ID.37
1290	3.62218	1	wild	-0.197361	ID.37.1290	ID.37
1290	3.62218	1	wild	-0.197361	ID.37.1290	ID.37
1290	3.62218	3	wild	-0.197361	ID.37.1290	ID.37
1290	3.62218	1	wild	-0.197361	ID.37.1290	ID.37
1290	3.62218	1	wild	-0.197361	ID.37.1290	ID.37
1290	3.62218	1	wild	-0.197361	ID.37.1290	ID.37
1294	0.681725	1	wild	-2.2374	ID.44.1294	ID.44
1294	0.681725	2	wild	-2.2374	ID.44.1294	ID.44
1294	0.681725	1	wild	-2.2374	ID.44.1294	ID.44
1294	0.681725	2	wild	-2.2374	ID.44.1294	ID.44
1294	0.681725	2	wild	-2.2374	ID.44.1294	ID.44
1294	0.681725	2	wild	-2.2374	ID.44.1294	ID.44
1294	0.681725	3	wild	-2.2374	ID.44.1294	ID.44
1294	0.681725	1	wild	-2.2374	ID.44.1294	ID.44
1294	0.681725	3	wild	-2.2374	ID.44.1294	ID.44
1294	0.681725	2	wild	-2.2374	ID.44.1294	ID.44
1294	0.681725	4	wild	-2.2374	ID.44.1294	ID.44
1294	0.681725	2	wild	-2.2374	ID.44.1294	ID.44
1294	0.681725	1	wild	-2.2374	ID.44.1294	ID.44
1294	0.681725	4	wild	-2.2374	ID.44.1294	ID.44
1294	0.681725	2	wild	-2.2374	ID.44.1294	ID.44
1294	0.681725	1	wild	-2.2374	ID.44.1294	ID.44
1294	0.681725	1	wild	-2.2374	ID.44.1294	ID.44
1294	0.681725	1	wild	-2.2374	ID.44.1294	ID.44
1294	0.681725	2	wild	-2.2374	ID.44.1294	ID.44
1294	0.681725	2	wild	-2.2374	ID.44.1294	ID.44
1294	0.681725	2	wild	-2.2374	ID.44.1294	ID.44
1294	0.681725	2	wild	-2.2374	ID.44.1294	ID.44
1294	0.681725	2	wild	-2.2374	ID.44.1294	ID.44
1294	0.681725	2	wild	-2.2374	ID.44.1294	ID.44
1294	0.681725	2	wild	-2.2374	ID.44.1294	ID.44
1294	0.681725	2	wild	-2.2374	ID.44.1294	ID.44
1294	0.681725	1	wild	-2.2374	ID.44.1294	ID.44
1294	0.681725	1	wild	-2.2374	ID.44.1294	ID.44
1294	0.681725	1	wild	-2.2374	ID.44.1294	ID.44
1294	0.681725	2	wild	-2.2374	ID.44.1294	ID.44
1294	0.681725	2	wild	-2.2374	ID.44.1294	ID.44
1294	0.681725	1	wild	-2.2374	ID.44.1294	ID.44
1294	0.681725	1	wild	-2.2374	ID.44.1294	ID.44
1294	0.681725	1	wild	-2.2374	ID.44.1294	ID.44
1294	0.681725	1	wild	-2.2374	ID.44.1294	ID.44
1294	0.681725	1	wild	-2.2374	ID.44.1294	ID.44
1300	0.687201	2	wild	-2.22763	ID.44.1300	ID.44
1300	0.687201	2	wild	-2.22763	ID.44.1300	ID.44
1300	0.687201	1	wild	-2.22763	ID.44.1300	ID.44
1300	0.687201	2	wild	-2.22763	ID.44.1300	ID.44
1300	0.687201	1	wild	-2.22763	ID.44.1300	ID.44
1300	0.687201	1	wild	-2.22763	ID.44.1300	ID.44
1300	0.687201	1	wild	-2.22763	ID.44.1300	ID.44
1300	0.687201	1	wild	-2.22763	ID.44.1300	ID.44
1300	0.687201	2	wild	-2.22763	ID.44.1300	ID.44
1300	0.687201	1	wild	-2.22763	ID.44.1300	ID.44
1300	0.687201	1	wild	-2.22763	ID.44.1300	ID.44
1300	0.687201	1	wild	-2.22763	ID.44.1300	ID.44
1300	0.687201	1	wild	-2.22763	ID.44.1300	ID.44
1300	0.687201	3	wild	-2.22763	ID.44.1300	ID.44
1300	0.687201	1	wild	-2.22763	ID.44.1300	ID.44
1300	0.687201	2	wild	-2.22763	ID.44.1300	ID.44
1300	0.687201	2	wild	-2.22763	ID.44.1300	ID.44
1300	0.687201	2	wild	-2.22763	ID.44.1300	ID.44
1300	0.687201	2	wild	-2.22763	ID.44.1300	ID.44
1300	0.687201	1	wild	-2.22763	ID.44.1300	ID.44
1300	0.687201	1	wild	-2.22763	ID.44.1300	ID.44
1300	0.687201	2	wild	-2.22763	ID.44.1300	ID.44
1300	0.687201	1	wild	-2.22763	ID.44.1300	ID.44
1300	0.687201	2	wild	-2.22763	ID.44.1300	ID.44
1300	0.687201	1	wild	-2.22763	ID.44.1300	ID.44
1300	0.687201	3	wild	-2.22763	ID.44.1300	ID.44
1300	0.687201	1	wild	-2.22763	ID.44.1300	ID.44
1300	0.687201	1	wild	-2.22763	ID.44.1300	ID.44
1300	0.687201	1	wild	-2.22763	ID.44.1300	ID.44
1300	0.687201	1	wild	-2.22763	ID.44.1300	ID.44
1300	0.687201	3	wild	-2.22763	ID.44.1300	ID.44
1300	0.687201	1	wild	-2.22763	ID.44.1300	ID.44
1300	0.687201	1	wild	-2.22763	ID.44.1300	ID.44
1300	0.687201	1	wild	-2.22763	ID.44.1300	ID.44
1300	0.687201	1	wild	-2.22763	ID.44.1300	ID.44
1300	0.687201	1	wild	-2.22763	ID.44.1300	ID.44
1300	0.687201	1	wild	-2.22763	ID.44.1300	ID.44
1300	0.687201	3	wild	-2.22763	ID.44.1300	ID.44
1300	0.687201	2	wild	-2.22763	ID.44.1300	ID.44
1300	0.687201	2	wild	-2.22763	ID.44.1300	ID.44
1300	0.687201	1	wild	-2.22763	ID.44.1300	ID.44
1300	0.687201	2	wild	-2.22763	ID.44.1300	ID.44
1300	0.687201	1	wild	-2.22763	ID.44.1300	ID.44
1300	0.687201	4	wild	-2.22763	ID.44.1300	ID.44
1300	0.687201	2	wild	-2.22763	ID.44.1300	ID.44
1300	0.687201	2	wild	-2.22763	ID.44.1300	ID.44
1300	0.687201	1	wild	-2.22763	ID.44.1300	ID.44
1300	0.687201	2	wild	-2.22763	ID.44.1300	ID.44
1300	0.687201	3	wild	-2.22763	ID.44.1300	ID.44
1300	0.687201	1	wild	-2.22763	ID.44.1300	ID.44
1300	0.687201	1	wild	-2.22763	ID.44.1300	ID.44
1300	0.687201	1	wild	-2.22763	ID.44.1300	ID.44
1300	0.687201	2	wild	-2.22763	ID.44.1300	ID.44
1300	0.687201	1	wild	-2.22763	ID.44.1300	ID.44
1307	0.695414	1	wild	-2.21312	ID.44.1307	ID.44
1307	0.695414	1	wild	-2.21312	ID.44.1307	ID.44
1307	0.695414	2	wild	-2.21312	ID.44.1307	ID.44
1307	0.695414	2	wild	-2.21312	ID.44.1307	ID.44
1307	0.695414	2	wild	-2.21312	ID.44.1307	ID.44
1307	0.695414	1	wild	-2.21312	ID.44.1307	ID.44
1307	0.695414	1	wild	-2.21312	ID.44.1307	ID.44
1307	0.695414	1	wild	-2.21312	ID.44.1307	ID.44
1307	0.695414	2	wild	-2.21312	ID.44.1307	ID.44
1307	0.695414	1	wild	-2.21312	ID.44.1307	ID.44
1307	0.695414	1	wild	-2.21312	ID.44.1307	ID.44
1307	0.695414	1	wild	-2.21312	ID.44.1307	ID.44
1307	0.695414	2	wild	-2.21312	ID.44.1307	ID.44
1307	0.695414	2	wild	-2.21312	ID.44.1307	ID.44
1307	0.695414	1	wild	-2.21312	ID.44.1307	ID.44
1307	0.695414	1	wild	-2.21312	ID.44.1307	ID.44
1307	0.695414	1	wild	-2.21312	ID.44.1307	ID.44
1307	0.695414	1	wild	-2.21312	ID.44.1307	ID.44
1307	0.695414	1	wild	-2.21312	ID.44.1307	ID.44
1307	0.695414	3	wild	-2.21312	ID.44.1307	ID.44
1307	0.695414	2	wild	-2.21312	ID.44.1307	ID.44
1307	0.695414	1	wild	-2.21312	ID.44.1307	ID.44
1307	0.695414	1	wild	-2.21312	ID.44.1307	ID.44
1307	0.695414	1	wild	-2.21312	ID.44.1307	ID.44
1307	0.695414	1	wild	-2.21312	ID.44.1307	ID.44
1307	0.695414	1	wild	-2.21312	ID.44.1307	ID.44
1307	0.695414	2	wild	-2.21312	ID.44.1307	ID.44
1307	0.695414	1	wild	-2.21312	ID.44.1307	ID.44
1307	0.695414	2	wild	-2.21312	ID.44.1307	ID.44
1307	0.695414	3	wild	-2.21312	ID.44.1307	ID.44
1307	0.695414	2	wild	-2.21312	ID.44.1307	ID.44
1307	0.695414	2	wild	-2.21312	ID.44.1307	ID.44
1307	0.695414	2	wild	-2.21312	ID.44.1307	ID.44
1307	0.695414	1	wild	-2.21312	ID.44.1307	ID.44
1307	0.695414	2	wild	-2.21312	ID.44.1307	ID.44
1307	0.695414	1	wild	-2.21312	ID.44.1307	ID.44
1307	0.695414	1	wild	-2.21312	ID.44.1307	ID.44
1307	0.695414	1	wild	-2.21312	ID.44.1307	ID.44
1290	3.62218	1	wild	-0.197361	ID.37.1290	ID.37
1670	4.27652	3	wild	0.00547612	ID.12.1670	ID.12
1670	4.27652	1	wild	0.00547612	ID.12.1670	ID.12
1670	4.27652	1	wild	0.00547612	ID.12.1670	ID.12
1670	4.27652	2	wild	0.00547612	ID.12.1670	ID.12
1670	4.27652	1	wild	0.00547612	ID.12.1670	ID.12
1670	4.27652	1	wild	0.00547612	ID.12.1670	ID.12
1670	4.27652	1	wild	0.00547612	ID.12.1670	ID.12
1670	4.27652	1	wild	0.00547612	ID.12.1670	ID.12
1670	4.27652	2	wild	0.00547612	ID.12.1670	ID.12
1670	4.27652	2	wild	0.00547612	ID.12.1670	ID.12
1670	4.27652	2	wild	0.00547612	ID.12.1670	ID.12
1670	4.27652	1	wild	0.00547612	ID.12.1670	ID.12
1670	4.27652	2	wild	0.00547612	ID.12.1670	ID.12
1670	4.27652	1	wild	0.00547612	ID.12.1670	ID.12
1670	4.27652	3	wild	0.00547612	ID.12.1670	ID.12
1670	4.27652	3	wild	0.00547612	ID.12.1670	ID.12
1670	4.27652	2	wild	0.00547612	ID.12.1670	ID.12
1670	4.27652	3	wild	0.00547612	ID.12.1670	ID.12
1670	4.27652	2	wild	0.00547612	ID.12.1670	ID.12
1670	4.27652	1	wild	0.00547612	ID.12.1670	ID.12
1670	4.27652	3	wild	0.00547612	ID.12.1670	ID.12
1670	4.27652	3	wild	0.00547612	ID.12.1670	ID.12
1670	4.27652	3	wild	0.00547612	ID.12.1670	ID.12
1670	4.27652	2	wild	0.00547612	ID.12.1670	ID.12
1670	4.27652	2	wild	0.00547612	ID.12.1670	ID.12
1670	4.27652	2	wild	0.00547612	ID.12.1670	ID.12
1670	4.27652	3	wild	0.00547612	ID.12.1670	ID.12
1670	4.27652	2	wild	0.00547612	ID.12.1670	ID.12
1670	4.27652	1	wild	0.00547612	ID.12.1670	ID.12
1670	4.27652	2	wild	0.00547612	ID.12.1670	ID.12
1670	4.27652	1	wild	0.00547612	ID.12.1670	ID.12
1670	4.27652	3	wild	0.00547612	ID.12.1670	ID.12
1670	4.27652	1	wild	0.00547612	ID.12.1670	ID.12
1670	4.27652	2	wild	0.00547612	ID.12.1670	ID.12
1670	4.27652	2	wild	0.00547612	ID.12.1670	ID.12
1670	4.27652	2	wild	0.00547612	ID.12.1670	ID.12
1670	4.27652	2	wild	0.00547612	ID.12.1670	ID.12
1670	4.27652	2	wild	0.00547612	ID.12.1670	ID.12
1670	4.27652	2	wild	0.00547612	ID.12.1670	ID.12
1670	4.27652	1	wild	0.00547612	ID.12.1670	ID.12
1670	4.27652	2	wild	0.00547612	ID.12.1670	ID.12
1670	4.27652	1	wild	0.00547612	ID.12.1670	ID.12
1670	4.27652	2	wild	0.00547612	ID.12.1670	ID.12
1670	4.27652	2	wild	0.00547612	ID.12.1670	ID.12
1670	4.27652	2	wild	0.00547612	ID.12.1670	ID.12
1670	4.27652	1	wild	0.00547612	ID.12.1670	ID.12
1670	4.27652	1	wild	0.00547612	ID.12.1670	ID.12
1670	4.27652	2	wild	0.00547612	ID.12.1670	ID.12
1670	4.27652	2	wild	0.00547612	ID.12.1670	ID.12
1670	4.27652	1	wild	0.00547612	ID.12.1670	ID.12
1670	4.27652	1	wild	0.00547612	ID.12.1670	ID.12
1670	4.27652	2	wild	0.00547612	ID.12.1670	ID.12
1670	4.27652	1	wild	0.00547612	ID.12.1670	ID.12
1670	4.27652	3	wild	0.00547612	ID.12.1670	ID.12
1670	4.27652	1	wild	0.00547612	ID.12.1670	ID.12
1670	4.27652	1	wild	0.00547612	ID.12.1670	ID.12
1670	4.27652	1	wild	0.00547612	ID.12.1670	ID.12
1670	4.27652	1	wild	0.00547612	ID.12.1670	ID.12
1670	4.27652	1	wild	0.00547612	ID.12.1670	ID.12
1670	4.27652	1	wild	0.00547612	ID.12.1670	ID.12
1670	4.27652	2	wild	0.00547612	ID.12.1670	ID.12
1670	73.859	1	wild	3.48535	ID.2.1670	ID.2
1670	4.27652	1	wild	0.00547612	ID.12.1670	ID.12
1670	4.27652	1	wild	0.00547612	ID.12.1670	ID.12
1670	4.27652	2	wild	0.00547612	ID.12.1670	ID.12
1670	4.27652	2	wild	0.00547612	ID.12.1670	ID.12
1670	4.27652	1	wild	0.00547612	ID.12.1670	ID.12
1670	4.27652	2	wild	0.00547612	ID.12.1670	ID.12
1670	4.27652	1	wild	0.00547612	ID.12.1670	ID.12
1670	4.27652	1	wild	0.00547612	ID.12.1670	ID.12
1670	4.27652	1	wild	0.00547612	ID.12.1670	ID.12
1670	4.27652	1	wild	0.00547612	ID.12.1670	ID.12
1670	4.27652	2	wild	0.00547612	ID.12.1670	ID.12
1670	4.27652	1	wild	0.00547612	ID.12.1670	ID.12
1670	4.27652	1	wild	0.00547612	ID.12.1670	ID.12
1670	4.27652	1	wild	0.00547612	ID.12.1670	ID.12
1674	4.27926	1	wild	0.00625788	ID.12.1674	ID.12
1674	4.27926	1	wild	0.00625788	ID.12.1674	ID.12
1674	4.27926	1	wild	0.00625788	ID.12.1674	ID.12
1674	4.27926	1	wild	0.00625788	ID.12.1674	ID.12
1674	4.27926	1	wild	0.00625788	ID.12.1674	ID.12
1674	4.27926	1	wild	0.00625788	ID.12.1674	ID.12
1674	4.27926	1	wild	0.00625788	ID.12.1674	ID.12
1674	4.27926	1	wild	0.00625788	ID.12.1674	ID.12
1674	4.27926	1	wild	0.00625788	ID.12.1674	ID.12
1674	4.27926	1	wild	0.00625788	ID.12.1674	ID.12
1674	4.27926	2	wild	0.00625788	ID.12.1674	ID.12
1674	4.27926	2	wild	0.00625788	ID.12.1674	ID.12
1674	4.27926	2	wild	0.00625788	ID.12.1674	ID.12
1674	4.27926	2	wild	0.00625788	ID.12.1674	ID.12
1674	4.27926	1	wild	0.00625788	ID.12.1674	ID.12
1674	4.27926	1	wild	0.00625788	ID.12.1674	ID.12
1674	4.27926	1	wild	0.00625788	ID.12.1674	ID.12
1674	4.27926	1	wild	0.00625788	ID.12.1674	ID.12
1674	4.27926	1	wild	0.00625788	ID.12.1674	ID.12
1674	4.27926	1	wild	0.00625788	ID.12.1674	ID.12
1674	4.27926	1	wild	0.00625788	ID.12.1674	ID.12
1674	4.27926	3	wild	0.00625788	ID.12.1674	ID.12
1674	4.27926	1	wild	0.00625788	ID.12.1674	ID.12
1674	4.27926	1	wild	0.00625788	ID.12.1674	ID.12
1674	4.27926	2	wild	0.00625788	ID.12.1674	ID.12
1674	4.27926	2	wild	0.00625788	ID.12.1674	ID.12
1674	4.27926	1	wild	0.00625788	ID.12.1674	ID.12
1674	4.27926	1	wild	0.00625788	ID.12.1674	ID.12
1674	4.27926	2	wild	0.00625788	ID.12.1674	ID.12
1674	4.27926	1	wild	0.00625788	ID.12.1674	ID.12
1674	4.27926	2	wild	0.00625788	ID.12.1674	ID.12
1674	4.27926	1	wild	0.00625788	ID.12.1674	ID.12
1674	4.27926	2	wild	0.00625788	ID.12.1674	ID.12
1674	4.27926	2	wild	0.00625788	ID.12.1674	ID.12
1674	4.27926	1	wild	0.00625788	ID.12.1674	ID.12
1674	4.27926	1	wild	0.00625788	ID.12.1674	ID.12
1674	4.27926	2	wild	0.00625788	ID.12.1674	ID.12
1674	4.27926	1	wild	0.00625788	ID.12.1674	ID.12
1674	4.27926	4	wild	0.00625788	ID.12.1674	ID.12
1674	4.27926	3	wild	0.00625788	ID.12.1674	ID.12
1674	4.27926	2	wild	0.00625788	ID.12.1674	ID.12
1674	4.27926	2	wild	0.00625788	ID.12.1674	ID.12
1674	4.27926	1	wild	0.00625788	ID.12.1674	ID.12
1674	4.27926	1	wild	0.00625788	ID.12.1674	ID.12
1674	4.27926	1	wild	0.00625788	ID.12.1674	ID.12
1674	4.27926	3	wild	0.00625788	ID.12.1674	ID.12
1674	4.27926	3	wild	0.00625788	ID.12.1674	ID.12
1674	4.27926	2	wild	0.00625788	ID.12.1674	ID.12
1674	4.27926	2	wild	0.00625788	ID.12.1674	ID.12
1674	4.27926	2	wild	0.00625788	ID.12.1674	ID.12
1674	4.27926	2	wild	0.00625788	ID.12.1674	ID.12
1674	4.27926	2	wild	0.00625788	ID.12.1674	ID.12
1674	4.27926	1	wild	0.00625788	ID.12.1674	ID.12
1674	4.27926	1	wild	0.00625788	ID.12.1674	ID.12
1674	4.27926	1	wild	0.00625788	ID.12.1674	ID.12
1674	4.27926	1	wild	0.00625788	ID.12.1674	ID.12
1674	4.27926	2	wild	0.00625788	ID.12.1674	ID.12
1674	4.27926	1	wild	0.00625788	ID.12.1674	ID.12
1674	4.27926	1	wild	0.00625788	ID.12.1674	ID.12
1674	4.27926	1	wild	0.00625788	ID.12.1674	ID.12
1674	4.27926	1	wild	0.00625788	ID.12.1674	ID.12
[truncated: 9,264 more rows]

## Sheet: model 2b
followNr	AgeAtThatTime	nr.objects	NumberOfManipulations	Wild_Zoo	cleaned_object_IL_CS	z.log.AgeAtThatTime	follow.in.subj	FocalName
54	1.65366	1	1	wild	BranchStickTwig	-0.949363	ID.13. 54	ID.13
58	1.6564	1	2	wild	BranchStickTwig	-0.947321	ID.13. 58	ID.13
67	1.66461	1	4	wild	BranchStickTwig	-0.941218	ID.13. 67	ID.13
69	1.66735	1	1	wild	BranchStickTwig	-0.93919	ID.13. 69	ID.13
126	2.41478	1	1	wild	BranchStickTwig	-0.482177	ID.29. 126	ID.29
126	2.41478	1	1	wild	LeafDeadleaf	-0.482177	ID.29. 126	ID.29
126	2.41478	1	1	wild	BranchStickTwig	-0.482177	ID.29. 126	ID.29
126	2.41478	1	1	wild	BranchStickTwig	-0.482177	ID.29. 126	ID.29
126	2.41478	1	2	wild	BranchStickTwig	-0.482177	ID.29. 126	ID.29
126	2.41478	1	1	wild	BranchStickTwig	-0.482177	ID.29. 126	ID.29
132	2.423	1	2	wild	BranchStickTwig	-0.477986	ID.29. 132	ID.29
132	2.423	1	1	wild	BranchStickTwig	-0.477986	ID.29. 132	ID.29
132	2.423	1	2	wild	BranchStickTwig	-0.477986	ID.29. 132	ID.29
164	6.75702	1	1	wild	BranchStickTwig	0.787498	ID.30. 164	ID.30
164	6.75702	1	2	wild	LeafDeadleaf	0.787498	ID.30. 164	ID.30
164	6.75702	1	2	wild	BranchStickTwig	0.787498	ID.30. 164	ID.30
184	5.03491	1	2	wild	BranchStickTwig	0.424494	ID.2. 184	ID.2
184	5.03491	1	2	wild	BranchStickTwig	0.424494	ID.2. 184	ID.2
184	5.03491	1	1	wild	BranchStickTwig	0.424494	ID.2. 184	ID.2
184	5.03491	1	1	wild	BranchStickTwig	0.424494	ID.2. 184	ID.2
186	2.03696	1	1	wild	BranchStickTwig	-0.69213	ID.13. 186	ID.13
200	2.08077	1	1	wild	LeafDeadleaf	-0.665875	ID.13. 200	ID.13
200	2.08077	1	2	wild	BranchStickTwig	-0.665875	ID.13. 200	ID.13
200	2.08077	1	1	wild	BranchStickTwig	-0.665875	ID.13. 200	ID.13
204	6.94045	1	2	wild	Bark	0.820549	ID.30. 204	ID.30
208	6.94593	1	3	wild	BranchStickTwig	0.821522	ID.30. 208	ID.30
208	6.94593	1	1	wild	LeafDeadleaf	0.821522	ID.30. 208	ID.30
210	2.69952	1	2	wild	LeafDeadleaf	-0.344638	ID.29. 210	ID.29
210	2.69952	1	2	wild	BranchStickTwig	-0.344638	ID.29. 210	ID.29
210	2.69952	1	1	wild	BranchStickTwig	-0.344638	ID.29. 210	ID.29
210	2.69952	1	1	wild	BranchStickTwig	-0.344638	ID.29. 210	ID.29
214	2.70226	1	1	wild	BranchStickTwig	-0.343387	ID.29. 214	ID.29
214	2.70226	1	1	wild	BranchStickTwig	-0.343387	ID.29. 214	ID.29
214	2.70226	1	1	wild	Bark	-0.343387	ID.29. 214	ID.29
214	2.70226	1	1	wild	LeafDeadleaf	-0.343387	ID.29. 214	ID.29
214	2.70226	1	2	wild	BranchStickTwig	-0.343387	ID.29. 214	ID.29
214	2.70226	1	1	wild	BranchStickTwig	-0.343387	ID.29. 214	ID.29
214	2.70226	1	2	wild	BranchStickTwig	-0.343387	ID.29. 214	ID.29
217	2.705	1	2	wild	BranchStickTwig	-0.342137	ID.29. 217	ID.29
217	2.705	1	1	wild	BranchStickTwig	-0.342137	ID.29. 217	ID.29
222	2.71047	1	1	wild	BranchStickTwig	-0.339642	ID.29. 222	ID.29
222	2.71047	1	2	wild	BranchStickTwig	-0.339642	ID.29. 222	ID.29
225	2.71321	1	3	wild	LeafDeadleaf	-0.338396	ID.29. 225	ID.29
228	2.71595	1	2	wild	LeafDeadleaf	-0.337152	ID.29. 228	ID.29
228	2.71595	1	1	wild	BranchStickTwig	-0.337152	ID.29. 228	ID.29
228	2.71595	1	1	wild	BranchStickTwig	-0.337152	ID.29. 228	ID.29
228	2.71595	1	2	wild	BranchStickTwig	-0.337152	ID.29. 228	ID.29
235	5.14168	1	3	wild	BranchStickTwig	0.450388	ID.2. 235	ID.2
238	5.14442	1	3	wild	BranchStickTwig	0.451045	ID.2. 238	ID.2
238	5.14442	1	2	wild	BranchStickTwig	0.451045	ID.2. 238	ID.2
238	5.14442	1	2	wild	BranchStickTwig	0.451045	ID.2. 238	ID.2
238	5.14442	1	1	wild	BranchStickTwig	0.451045	ID.2. 238	ID.2
242	5.1499	1	2	wild	LeafDeadleaf	0.452358	ID.2. 242	ID.2
251	7.02532	1	1	wild	Bark	0.835547	ID.30. 251	ID.30
251	7.02532	1	1	wild	BranchStickTwig	0.835547	ID.30. 251	ID.30
261	7.0527	1	1	wild	BranchStickTwig	0.840347	ID.30. 261	ID.30
305	2.97604	1	1	wild	BranchStickTwig	-0.224305	ID.29. 305	ID.29
305	2.97604	1	1	wild	Treetrunk	-0.224305	ID.29. 305	ID.29
305	2.97604	1	1	wild	BranchStickTwig	-0.224305	ID.29. 305	ID.29
314	2.98973	1	1	wild	BranchStickTwig	-0.218642	ID.29. 314	ID.29
314	2.98973	1	2	wild	BranchStickTwig	-0.218642	ID.29. 314	ID.29
314	2.98973	1	2	wild	BranchStickTwig	-0.218642	ID.29. 314	ID.29
314	2.98973	1	1	wild	BranchStickTwig	-0.218642	ID.29. 314	ID.29
314	2.98973	1	1	wild	BranchStickTwig	-0.218642	ID.29. 314	ID.29
314	2.98973	1	1	wild	BranchStickTwig	-0.218642	ID.29. 314	ID.29
314	2.98973	1	1	wild	BranchStickTwig	-0.218642	ID.29. 314	ID.29
314	2.98973	1	1	wild	BranchStickTwig	-0.218642	ID.29. 314	ID.29
314	2.98973	1	2	wild	LeafDeadleaf	-0.218642	ID.29. 314	ID.29
314	2.98973	1	1	wild	LeafDeadleaf	-0.218642	ID.29. 314	ID.29
314	2.98973	1	2	wild	BranchStickTwig	-0.218642	ID.29. 314	ID.29
370	5.77413	1	1	wild	LeafDeadleaf	0.593532	ID.2. 370	ID.2
370	5.77413	1	1	wild	BranchStickTwig	0.593532	ID.2. 370	ID.2
385	7.66324	1	2	wild	LeafDeadleaf	0.942792	ID.30. 385	ID.30
423	9.86174	1	1	wild	BranchStickTwig	1.25402	ID.24. 423	ID.24
423	9.86174	1	2	wild	BranchStickTwig	1.25402	ID.24. 423	ID.24
423	9.86174	1	1	wild	BranchStickTwig	1.25402	ID.24. 423	ID.24
429	3.61396	1	3	wild	BranchStickTwig	0.0153362	ID.29. 429	ID.29
429	3.61396	1	1	wild	BranchStickTwig	0.0153362	ID.29. 429	ID.29
430	3.6167	1	1	wild	BranchStickTwig	0.0162707	ID.29. 430	ID.29
430	3.6167	1	2	wild	BranchStickTwig	0.0162707	ID.29. 430	ID.29
434	3.61944	1	1	wild	BranchStickTwig	0.0172045	ID.29. 434	ID.29
434	3.61944	1	2	wild	BranchStickTwig	0.0172045	ID.29. 434	ID.29
436	3.62218	1	1	wild	BranchStickTwig	0.0181376	ID.29. 436	ID.29
436	3.62218	1	1	wild	BranchStickTwig	0.0181376	ID.29. 436	ID.29
436	3.62218	1	1	wild	BranchStickTwig	0.0181376	ID.29. 436	ID.29
436	3.62218	1	2	wild	LeafDeadleaf	0.0181376	ID.29. 436	ID.29
438	3.62491	1	1	wild	BranchStickTwig	0.0190696	ID.29. 438	ID.29
438	3.62491	1	1	wild	BranchStickTwig	0.0190696	ID.29. 438	ID.29
438	3.62491	1	1	wild	BranchStickTwig	0.0190696	ID.29. 438	ID.29
438	3.62491	1	1	wild	BranchStickTwig	0.0190696	ID.29. 438	ID.29
447	7.91239	1	1	wild	BranchStickTwig	0.982271	ID.30. 447	ID.30
447	7.91239	1	2	wild	BranchStickTwig	0.982271	ID.30. 447	ID.30
452	7.9206	1	2	wild	LeafDeadleaf	0.983551	ID.30. 452	ID.30
514	10.1547	1	1	wild	Bark	1.29014	ID.24. 514	ID.24
515	10.1574	1	2	wild	Bark	1.29048	ID.24. 515	ID.24
639	11.7563	1	3	wild	BranchStickTwig	1.47086	ID.24. 639	ID.24
645	7.93703	1	2	wild	LeafDeadleaf	0.986108	ID.2. 645	ID.2
645	7.93703	1	2	wild	LeafDeadleaf	0.986108	ID.2. 645	ID.2
646	7.93977	1	2	wild	LeafDeadleaf	0.986533	ID.2. 646	ID.2
651	12.8624	1	1	wild	BranchStickTwig	1.58181	ID.36. 651	ID.36
651	12.8624	1	2	wild	LeafDeadleaf	1.58181	ID.36. 651	ID.36
656	5.54415	1	1	wild	BranchStickTwig	0.54338	ID.29. 656	ID.29
658	5.54689	1	1	wild	BranchStickTwig	0.543989	ID.29. 658	ID.29
658	5.54689	1	1	wild	Bark	0.543989	ID.29. 658	ID.29
658	5.54689	1	1	wild	dead leaf	0.543989	ID.29. 658	ID.29
658	5.54689	1	2	wild	BranchStickTwig	0.543989	ID.29. 658	ID.29
658	5.54689	1	1	wild	LeafDeadleaf	0.543989	ID.29. 658	ID.29
658	5.54689	1	1	wild	LeafDeadleaf	0.543989	ID.29. 658	ID.29
658	5.54689	1	1	wild	LeafDeadleaf	0.543989	ID.29. 658	ID.29
658	5.54689	1	3	wild	BranchStickTwig	0.543989	ID.29. 658	ID.29
658	5.54689	1	1	wild	BranchStickTwig	0.543989	ID.29. 658	ID.29
658	5.54689	1	1	wild	dead leaf	0.543989	ID.29. 658	ID.29
659	5.54962	1	3	wild	BranchStickTwig	0.544598	ID.29. 659	ID.29
659	5.54962	1	2	wild	LeafDeadleaf	0.544598	ID.29. 659	ID.29
659	5.54962	1	1	wild	Bark	0.544598	ID.29. 659	ID.29
659	5.54962	1	2	wild	BranchStickTwig	0.544598	ID.29. 659	ID.29
659	5.54962	1	2	wild	LeafDeadleaf	0.544598	ID.29. 659	ID.29
659	5.54962	1	2	wild	Treetrunk	0.544598	ID.29. 659	ID.29
659	5.54962	1	2	wild	BranchStickTwig	0.544598	ID.29. 659	ID.29
659	5.54962	1	2	wild	LeafDeadleaf	0.544598	ID.29. 659	ID.29
659	5.54962	1	3	wild	BranchStickTwig	0.544598	ID.29. 659	ID.29
662	5.5551	1	1	wild	BranchStickTwig	0.545815	ID.29. 662	ID.29
664	5.55784	1	2	wild	LeafDeadleaf	0.546423	ID.29. 664	ID.29
664	5.55784	1	2	wild	LeafDeadleaf	0.546423	ID.29. 664	ID.29
664	5.55784	1	3	wild	BranchStickTwig	0.546423	ID.29. 664	ID.29
664	5.55784	1	2	wild	BranchStickTwig	0.546423	ID.29. 664	ID.29
664	5.55784	1	1	wild	LeafDeadleaf	0.546423	ID.29. 664	ID.29
664	5.55784	1	2	wild	LeafDeadleaf	0.546423	ID.29. 664	ID.29
686	5.62628	1	1	wild	dead leaf	0.561526	ID.29. 686	ID.29
688	5.62902	1	1	wild	BranchStickTwig	0.562126	ID.29. 688	ID.29
688	5.62902	1	1	wild	BranchStickTwig	0.562126	ID.29. 688	ID.29
688	5.62902	1	2	wild	LeafDeadleaf	0.562126	ID.29. 688	ID.29
690	5.63176	1	1	wild	LeafDeadleaf	0.562726	ID.29. 690	ID.29
692	8.04928	1	1	wild	BranchStickTwig	1.00344	ID.2. 692	ID.2
692	8.04928	1	1	wild	BranchStickTwig	1.00344	ID.2. 692	ID.2
692	8.04928	1	1	wild	BranchStickTwig	1.00344	ID.2. 692	ID.2
712	12.9856	1	2	wild	BranchStickTwig	1.59357	ID.36. 712	ID.36
721	11.9233	1	2	wild	Bark	1.48826	ID.24. 721	ID.24
736	0.52293	1	1	wild	LeafDeadleaf	-2.36998	ID.25. 736	ID.25
739	0.525667	1	2	wild	dead leaf	-2.36354	ID.25. 739	ID.25
739	0.525667	1	1	wild	LeafDeadleaf	-2.36354	ID.25. 739	ID.25
739	0.525667	1	1	wild	LeafDeadleaf	-2.36354	ID.25. 739	ID.25
739	0.525667	1	1	wild	LeafDeadleaf	-2.36354	ID.25. 739	ID.25
739	0.525667	1	1	wild	LeafDeadleaf	-2.36354	ID.25. 739	ID.25
739	0.525667	1	1	wild	dead leaf	-2.36354	ID.25. 739	ID.25
739	0.525667	1	2	wild	LeafDeadleaf	-2.36354	ID.25. 739	ID.25
739	0.525667	1	1	wild	LeafDeadleaf	-2.36354	ID.25. 739	ID.25
739	0.525667	1	1	wild	LeafDeadleaf	-2.36354	ID.25. 739	ID.25
739	0.525667	1	1	wild	LeafDeadleaf	-2.36354	ID.25. 739	ID.25
742	0.528405	1	1	wild	BranchStickTwig	-2.35713	ID.25. 742	ID.25
742	0.528405	1	1	wild	LeafDeadleaf	-2.35713	ID.25. 742	ID.25
742	0.528405	1	1	wild	BranchStickTwig	-2.35713	ID.25. 742	ID.25
742	0.528405	1	1	wild	LeafDeadleaf	-2.35713	ID.25. 742	ID.25
742	0.528405	1	1	wild	LeafDeadleaf	-2.35713	ID.25. 742	ID.25
742	0.528405	1	1	wild	LeafDeadleaf	-2.35713	ID.25. 742	ID.25
742	0.528405	1	1	wild	LeafDeadleaf	-2.35713	ID.25. 742	ID.25
744	0.531143	1	1	wild	BranchStickTwig	-2.35075	ID.25. 744	ID.25
744	0.531143	1	1	wild	BranchStickTwig	-2.35075	ID.25. 744	ID.25
747	0.533881	1	1	wild	LeafDeadleaf	-2.34441	ID.25. 747	ID.25
747	0.533881	1	1	wild	LeafDeadleaf	-2.34441	ID.25. 747	ID.25
747	0.533881	1	1	wild	LeafDeadleaf	-2.34441	ID.25. 747	ID.25
747	0.533881	1	1	wild	LeafDeadleaf	-2.34441	ID.25. 747	ID.25
747	0.533881	1	3	wild	LeafDeadleaf	-2.34441	ID.25. 747	ID.25
747	0.533881	1	1	wild	LeafDeadleaf	-2.34441	ID.25. 747	ID.25
747	0.533881	1	1	wild	LeafDeadleaf	-2.34441	ID.25. 747	ID.25
747	0.533881	1	1	wild	LeafDeadleaf	-2.34441	ID.25. 747	ID.25
747	0.533881	1	1	wild	BranchStickTwig	-2.34441	ID.25. 747	ID.25
747	0.533881	1	1	wild	BranchStickTwig	-2.34441	ID.25. 747	ID.25
747	0.533881	1	2	wild	LeafDeadleaf	-2.34441	ID.25. 747	ID.25
747	0.533881	1	2	wild	LeafDeadleaf	-2.34441	ID.25. 747	ID.25
750	0.539357	1	1	wild	LeafDeadleaf	-2.33182	ID.25. 750	ID.25
750	0.539357	1	1	wild	LeafDeadleaf	-2.33182	ID.25. 750	ID.25
750	0.539357	1	1	wild	LeafDeadleaf	-2.33182	ID.25. 750	ID.25
750	0.539357	1	1	wild	BranchStickTwig	-2.33182	ID.25. 750	ID.25
750	0.539357	1	1	wild	LeafDeadleaf	-2.33182	ID.25. 750	ID.25
750	0.539357	1	1	wild	LeafDeadleaf	-2.33182	ID.25. 750	ID.25
750	0.539357	1	1	wild	LeafDeadleaf	-2.33182	ID.25. 750	ID.25
750	0.539357	1	1	wild	LeafDeadleaf	-2.33182	ID.25. 750	ID.25
750	0.539357	1	3	wild	LeafDeadleaf	-2.33182	ID.25. 750	ID.25
750	0.539357	1	1	wild	LeafDeadleaf	-2.33182	ID.25. 750	ID.25
750	0.539357	1	1	wild	LeafDeadleaf	-2.33182	ID.25. 750	ID.25
750	0.539357	1	1	wild	BranchStickTwig	-2.33182	ID.25. 750	ID.25
750	0.539357	1	1	wild	LeafDeadleaf	-2.33182	ID.25. 750	ID.25
750	0.539357	1	1	wild	BranchStickTwig	-2.33182	ID.25. 750	ID.25
750	0.539357	1	2	wild	LeafDeadleaf	-2.33182	ID.25. 750	ID.25
750	0.539357	1	1	wild	LeafDeadleaf	-2.33182	ID.25. 750	ID.25
750	0.539357	1	1	wild	LeafDeadleaf	-2.33182	ID.25. 750	ID.25
750	0.539357	1	1	wild	BranchStickTwig	-2.33182	ID.25. 750	ID.25
750	0.539357	1	1	wild	BranchStickTwig	-2.33182	ID.25. 750	ID.25
750	0.539357	1	1	wild	LeafDeadleaf	-2.33182	ID.25. 750	ID.25
750	0.539357	1	1	wild	BranchStickTwig	-2.33182	ID.25. 750	ID.25
750	0.539357	1	1	wild	LeafDeadleaf	-2.33182	ID.25. 750	ID.25
750	0.539357	1	1	wild	LeafDeadleaf	-2.33182	ID.25. 750	ID.25
750	0.539357	1	1	wild	BranchStickTwig	-2.33182	ID.25. 750	ID.25
750	0.539357	1	1	wild	BranchStickTwig	-2.33182	ID.25. 750	ID.25
752	0.542094	1	1	wild	LeafDeadleaf	-2.32557	ID.25. 752	ID.25
752	0.542094	1	1	wild	LeafDeadleaf	-2.32557	ID.25. 752	ID.25
752	0.542094	1	1	wild	BranchStickTwig	-2.32557	ID.25. 752	ID.25
752	0.542094	1	1	wild	LeafDeadleaf	-2.32557	ID.25. 752	ID.25
752	0.542094	1	1	wild	LeafDeadleaf	-2.32557	ID.25. 752	ID.25
752	0.542094	1	2	wild	LeafDeadleaf	-2.32557	ID.25. 752	ID.25
755	0.544832	1	1	wild	LeafDeadleaf	-2.31935	ID.25. 755	ID.25
755	0.544832	1	1	wild	BranchStickTwig	-2.31935	ID.25. 755	ID.25
755	0.544832	1	1	wild	BranchStickTwig	-2.31935	ID.25. 755	ID.25
755	0.544832	1	1	wild	BranchStickTwig	-2.31935	ID.25. 755	ID.25
755	0.544832	1	1	wild	BranchStickTwig	-2.31935	ID.25. 755	ID.25
755	0.544832	1	1	wild	LeafDeadleaf	-2.31935	ID.25. 755	ID.25
755	0.544832	1	1	wild	BranchStickTwig	-2.31935	ID.25. 755	ID.25
755	0.544832	1	1	wild	LeafDeadleaf	-2.31935	ID.25. 755	ID.25
755	0.544832	1	1	wild	LeafDeadleaf	-2.31935	ID.25. 755	ID.25
755	0.544832	1	1	wild	LeafDeadleaf	-2.31935	ID.25. 755	ID.25
755	0.544832	1	1	wild	LeafDeadleaf	-2.31935	ID.25. 755	ID.25
755	0.544832	1	1	wild	BranchStickTwig	-2.31935	ID.25. 755	ID.25
757	0.54757	1	1	wild	LeafDeadleaf	-2.31317	ID.25. 757	ID.25
757	0.54757	1	1	wild	BranchStickTwig	-2.31317	ID.25. 757	ID.25
758	9.97125	1	2	wild	Bark	1.26765	ID.30. 758	ID.30
760	9.97399	1	1	wild	Bark	1.26799	ID.30. 760	ID.30
766	5.73032	1	1	wild	BranchStickTwig	0.584135	ID.29. 766	ID.29
766	5.73032	1	2	wild	BranchStickTwig	0.584135	ID.29. 766	ID.29
766	5.73032	1	1	wild	BranchStickTwig	0.584135	ID.29. 766	ID.29
766	5.73032	1	1	wild	BranchStickTwig	0.584135	ID.29. 766	ID.29
766	5.73032	1	1	wild	LeafDeadleaf	0.584135	ID.29. 766	ID.29
766	5.73032	1	2	wild	BranchStickTwig	0.584135	ID.29. 766	ID.29
766	5.73032	1	2	wild	BranchStickTwig	0.584135	ID.29. 766	ID.29
766	5.73032	1	2	wild	BranchStickTwig	0.584135	ID.29. 766	ID.29
766	5.73032	1	1	wild	LeafDeadleaf	0.584135	ID.29. 766	ID.29
766	5.73032	1	1	wild	LeafDeadleaf	0.584135	ID.29. 766	ID.29
766	5.73032	1	1	wild	LeafDeadleaf	0.584135	ID.29. 766	ID.29
766	5.73032	1	1	wild	BranchStickTwig	0.584135	ID.29. 766	ID.29
766	5.73032	1	1	wild	LeafDeadleaf	0.584135	ID.29. 766	ID.29
768	5.73306	1	1	wild	BranchStickTwig	0.584724	ID.29. 768	ID.29
768	5.73306	1	1	wild	BranchStickTwig	0.584724	ID.29. 768	ID.29
768	5.73306	1	2	wild	BranchStickTwig	0.584724	ID.29. 768	ID.29
768	5.73306	1	2	wild	BranchStickTwig	0.584724	ID.29. 768	ID.29
768	5.73306	1	1	wild	BranchStickTwig	0.584724	ID.29. 768	ID.29
768	5.73306	1	2	wild	BranchStickTwig	0.584724	ID.29. 768	ID.29
768	5.73306	1	1	wild	LeafDeadleaf	0.584724	ID.29. 768	ID.29
768	5.73306	1	1	wild	Bark	0.584724	ID.29. 768	ID.29
768	5.73306	1	1	wild	LeafDeadleaf	0.584724	ID.29. 768	ID.29
768	5.73306	1	1	wild	LeafDeadleaf	0.584724	ID.29. 768	ID.29
768	5.73306	1	1	wild	LeafDeadleaf	0.584724	ID.29. 768	ID.29
768	5.73306	1	1	wild	LeafDeadleaf	0.584724	ID.29. 768	ID.29
787	13.1198	1	1	wild	BranchStickTwig	1.60626	ID.36. 787	ID.36
787	13.1198	1	2	wild	Bark	1.60626	ID.36. 787	ID.36
793	10.0561	1	2	wild	Bark	1.27811	ID.30. 793	ID.30
793	10.0561	1	1	wild	dead leaf	1.27811	ID.30. 793	ID.30
797	10.0616	1	3	wild	Bark	1.27878	ID.30. 797	ID.30
797	10.0616	1	2	wild	Bark	1.27878	ID.30. 797	ID.30
798	10.0643	1	1	wild	dead leaf	1.27911	ID.30. 798	ID.30
798	10.0643	1	1	wild	dead leaf	1.27911	ID.30. 798	ID.30
798	10.0643	1	2	wild	Bark	1.27911	ID.30. 798	ID.30
803	8.22998	1	3	wild	Bark	1.03083	ID.2. 803	ID.2
803	8.22998	1	3	wild	Bark	1.03083	ID.2. 803	ID.2
803	8.22998	1	2	wild	Bark	1.03083	ID.2. 803	ID.2
826	0.536619	1	1	wild	BranchStickTwig	-2.3381	ID.25. 826	ID.25
826	0.536619	1	2	wild	LeafDeadleaf	-2.3381	ID.25. 826	ID.25
991	2.83915	1	1	wild	LeafDeadleaf	-0.28241	ID.25. 991	ID.25
991	2.83915	1	1	wild	LeafDeadleaf	-0.28241	ID.25. 991	ID.25
991	2.83915	1	1	wild	LeafDeadleaf	-0.28241	ID.25. 991	ID.25
991	2.83915	1	1	wild	LeafDeadleaf	-0.28241	ID.25. 991	ID.25
991	2.83915	1	1	wild	dead leaf	-0.28241	ID.25. 991	ID.25
991	2.83915	1	1	wild	LeafDeadleaf	-0.28241	ID.25. 991	ID.25
991	2.83915	1	1	wild	BranchStickTwig	-0.28241	ID.25. 991	ID.25
991	2.83915	1	1	wild	BranchStickTwig	-0.28241	ID.25. 991	ID.25
991	2.83915	1	1	wild	LeafDeadleaf	-0.28241	ID.25. 991	ID.25
991	2.83915	1	1	wild	dead leaf	-0.28241	ID.25. 991	ID.25
991	2.83915	1	1	wild	Bark	-0.28241	ID.25. 991	ID.25
991	2.83915	1	1	wild	LeafDeadleaf	-0.28241	ID.25. 991	ID.25
991	2.83915	1	1	wild	LeafDeadleaf	-0.28241	ID.25. 991	ID.25
991	2.83915	1	1	wild	LeafDeadleaf	-0.28241	ID.25. 991	ID.25
991	2.83915	1	1	wild	LeafDeadleaf	-0.28241	ID.25. 991	ID.25
991	2.83915	1	1	wild	dead leaf	-0.28241	ID.25. 991	ID.25
991	2.83915	1	2	wild	Bark	-0.28241	ID.25. 991	ID.25
991	2.83915	1	1	wild	LeafDeadleaf	-0.28241	ID.25. 991	ID.25
991	2.83915	1	1	wild	LeafDeadleaf	-0.28241	ID.25. 991	ID.25
993	2.84189	1	1	wild	Bark	-0.281221	ID.25. 993	ID.25
993	2.84189	1	1	wild	LeafDeadleaf	-0.281221	ID.25. 993	ID.25
993	2.84189	1	1	wild	LeafDeadleaf	-0.281221	ID.25. 993	ID.25
993	2.84189	1	1	wild	dead leaf	-0.281221	ID.25. 993	ID.25
993	2.84189	1	1	wild	LeafDeadleaf	-0.281221	ID.25. 993	ID.25
993	2.84189	1	1	wild	dead leaf	-0.281221	ID.25. 993	ID.25
993	2.84189	1	1	wild	LeafDeadleaf	-0.281221	ID.25. 993	ID.25
993	2.84189	1	1	wild	LeafDeadleaf	-0.281221	ID.25. 993	ID.25
993	2.84189	1	1	wild	LeafDeadleaf	-0.281221	ID.25. 993	ID.25
993	2.84189	1	2	wild	LeafDeadleaf	-0.281221	ID.25. 993	ID.25
993	2.84189	1	1	wild	Treefork	-0.281221	ID.25. 993	ID.25
993	2.84189	1	1	wild	LeafDeadleaf	-0.281221	ID.25. 993	ID.25
993	2.84189	1	1	wild	LeafDeadleaf	-0.281221	ID.25. 993	ID.25
993	2.84189	1	1	wild	LeafDeadleaf	-0.281221	ID.25. 993	ID.25
993	2.84189	1	1	wild	Bark	-0.281221	ID.25. 993	ID.25
993	2.84189	1	3	wild	BranchStickTwig	-0.281221	ID.25. 993	ID.25
993	2.84189	1	1	wild	LeafDeadleaf	-0.281221	ID.25. 993	ID.25
993	2.84189	1	2	wild	BranchStickTwig	-0.281221	ID.25. 993	ID.25
993	2.84189	1	1	wild	BranchStickTwig	-0.281221	ID.25. 993	ID.25
993	2.84189	1	1	wild	LeafDeadleaf	-0.281221	ID.25. 993	ID.25
993	2.84189	1	1	wild	LeafDeadleaf	-0.281221	ID.25. 993	ID.25
993	2.84189	1	1	wild	Bark	-0.281221	ID.25. 993	ID.25
993	2.84189	1	1	wild	Bark	-0.281221	ID.25. 993	ID.25
993	2.84189	1	1	wild	LeafDeadleaf	-0.281221	ID.25. 993	ID.25
993	2.84189	1	1	wild	BranchStickTwig	-0.281221	ID.25. 993	ID.25
993	2.84189	1	3	wild	LeafDeadleaf	-0.281221	ID.25. 993	ID.25
993	2.84189	1	1	wild	LeafDeadleaf	-0.281221	ID.25. 993	ID.25
993	2.84189	1	1	wild	dead leaf	-0.281221	ID.25. 993	ID.25
993	2.84189	1	1	wild	LeafDeadleaf	-0.281221	ID.25. 993	ID.25
993	2.84189	1	2	wild	BranchStickTwig	-0.281221	ID.25. 993	ID.25
995	2.84463	1	1	wild	Bark	-0.280032	ID.25. 995	ID.25
995	2.84463	1	1	wild	BranchStickTwig	-0.280032	ID.25. 995	ID.25
995	2.84463	1	1	wild	LeafDeadleaf	-0.280032	ID.25. 995	ID.25
995	2.84463	1	2	wild	BranchStickTwig	-0.280032	ID.25. 995	ID.25
995	2.84463	1	1	wild	dead leaf	-0.280032	ID.25. 995	ID.25
995	2.84463	1	1	wild	LeafDeadleaf	-0.280032	ID.25. 995	ID.25
995	2.84463	1	2	wild	BranchStickTwig	-0.280032	ID.25. 995	ID.25
995	2.84463	1	3	wild	LeafDeadleaf	-0.280032	ID.25. 995	ID.25
995	2.84463	1	1	wild	LeafDeadleaf	-0.280032	ID.25. 995	ID.25
995	2.84463	1	1	wild	LeafDeadleaf	-0.280032	ID.25. 995	ID.25
995	2.84463	1	1	wild	LeafDeadleaf	-0.280032	ID.25. 995	ID.25
995	2.84463	1	1	wild	LeafDeadleaf	-0.280032	ID.25. 995	ID.25
995	2.84463	1	1	wild	LeafDeadleaf	-0.280032	ID.25. 995	ID.25
995	2.84463	1	1	wild	LeafDeadleaf	-0.280032	ID.25. 995	ID.25
995	2.84463	1	1	wild	BranchStickTwig	-0.280032	ID.25. 995	ID.25
995	2.84463	1	1	wild	LeafDeadleaf	-0.280032	ID.25. 995	ID.25
995	2.84463	1	1	wild	LeafDeadleaf	-0.280032	ID.25. 995	ID.25
995	2.84463	1	2	wild	LeafDeadleaf	-0.280032	ID.25. 995	ID.25
995	2.84463	1	1	wild	Bark	-0.280032	ID.25. 995	ID.25
995	2.84463	1	2	wild	BranchStickTwig	-0.280032	ID.25. 995	ID.25
995	2.84463	1	3	wild	Bark	-0.280032	ID.25. 995	ID.25
995	2.84463	1	3	wild	BranchStickTwig	-0.280032	ID.25. 995	ID.25
995	2.84463	1	2	wild	BranchStickTwig	-0.280032	ID.25. 995	ID.25
995	2.84463	1	1	wild	BranchStickTwig	-0.280032	ID.25. 995	ID.25
995	2.84463	1	1	wild	Bark	-0.280032	ID.25. 995	ID.25
995	2.84463	1	1	wild	BranchStickTwig	-0.280032	ID.25. 995	ID.25
995	2.84463	1	1	wild	BranchStickTwig	-0.280032	ID.25. 995	ID.25
995	2.84463	1	3	wild	BranchStickTwig	-0.280032	ID.25. 995	ID.25
995	2.84463	1	3	wild	BranchStickTwig	-0.280032	ID.25. 995	ID.25
995	2.84463	1	2	wild	BranchStickTwig	-0.280032	ID.25. 995	ID.25
995	2.84463	1	1	wild	LeafDeadleaf	-0.280032	ID.25. 995	ID.25
995	2.84463	1	2	wild	BranchStickTwig	-0.280032	ID.25. 995	ID.25
995	2.84463	1	1	wild	LeafDeadleaf	-0.280032	ID.25. 995	ID.25
995	2.84463	1	1	wild	LeafDeadleaf	-0.280032	ID.25. 995	ID.25
995	2.84463	1	1	wild	LeafDeadleaf	-0.280032	ID.25. 995	ID.25
995	2.84463	1	3	wild	BranchStickTwig	-0.280032	ID.25. 995	ID.25
995	2.84463	1	3	wild	BranchStickTwig	-0.280032	ID.25. 995	ID.25
995	2.84463	1	1	wild	LeafDeadleaf	-0.280032	ID.25. 995	ID.25
995	2.84463	1	3	wild	LeafDeadleaf	-0.280032	ID.25. 995	ID.25
995	2.84463	1	2	wild	LeafDeadleaf	-0.280032	ID.25. 995	ID.25
995	2.84463	1	1	wild	LeafDeadleaf	-0.280032	ID.25. 995	ID.25
999	2.8501	1	1	wild	LeafDeadleaf	-0.277659	ID.25. 999	ID.25
999	2.8501	1	1	wild	BranchStickTwig	-0.277659	ID.25. 999	ID.25
999	2.8501	1	1	wild	LeafDeadleaf	-0.277659	ID.25. 999	ID.25
999	2.8501	1	1	wild	LeafDeadleaf	-0.277659	ID.25. 999	ID.25
999	2.8501	1	1	wild	LeafDeadleaf	-0.277659	ID.25. 999	ID.25
999	2.8501	1	1	wild	BranchStickTwig	-0.277659	ID.25. 999	ID.25
1001	2.85284	1	1	wild	BranchStickTwig	-0.276474	ID.25.1001	ID.25
1001	2.85284	1	1	wild	LeafDeadleaf	-0.276474	ID.25.1001	ID.25
1001	2.85284	1	2	wild	Bark	-0.276474	ID.25.1001	ID.25
1001	2.85284	1	1	wild	dead leaf	-0.276474	ID.25.1001	ID.25
1001	2.85284	1	1	wild	LeafDeadleaf	-0.276474	ID.25.1001	ID.25
1001	2.85284	1	2	wild	dead leaf	-0.276474	ID.25.1001	ID.25
1001	2.85284	1	1	wild	LeafDeadleaf	-0.276474	ID.25.1001	ID.25
1001	2.85284	1	2	wild	dead leaf	-0.276474	ID.25.1001	ID.25
1001	2.85284	1	1	wild	dead leaf	-0.276474	ID.25.1001	ID.25
1001	2.85284	1	1	wild	LeafDeadleaf	-0.276474	ID.25.1001	ID.25
1001	2.85284	1	1	wild	LeafDeadleaf	-0.276474	ID.25.1001	ID.25
1001	2.85284	1	3	wild	LeafDeadleaf	-0.276474	ID.25.1001	ID.25
1001	2.85284	1	3	wild	LeafDeadleaf	-0.276474	ID.25.1001	ID.25
1001	2.85284	1	2	wild	LeafDeadleaf	-0.276474	ID.25.1001	ID.25
1001	2.85284	1	2	wild	LeafDeadleaf	-0.276474	ID.25.1001	ID.25
1001	2.85284	1	1	wild	LeafDeadleaf	-0.276474	ID.25.1001	ID.25
1001	2.85284	1	1	wild	LeafDeadleaf	-0.276474	ID.25.1001	ID.25
1001	2.85284	1	1	wild	LeafDeadleaf	-0.276474	ID.25.1001	ID.25
1001	2.85284	1	2	wild	LeafDeadleaf	-0.276474	ID.25.1001	ID.25
1001	2.85284	1	1	wild	LeafDeadleaf	-0.276474	ID.25.1001	ID.25
1001	2.85284	1	1	wild	LeafDeadleaf	-0.276474	ID.25.1001	ID.25
1001	2.85284	1	2	wild	BranchStickTwig	-0.276474	ID.25.1001	ID.25
1001	2.85284	1	1	wild	LeafDeadleaf	-0.276474	ID.25.1001	ID.25
1001	2.85284	1	3	wild	Bark	-0.276474	ID.25.1001	ID.25
1001	2.85284	1	1	wild	dead leaf	-0.276474	ID.25.1001	ID.25
1001	2.85284	1	3	wild	dead leaf	-0.276474	ID.25.1001	ID.25
1001	2.85284	1	1	wild	Bark	-0.276474	ID.25.1001	ID.25
1001	2.85284	1	2	wild	BranchStickTwig	-0.276474	ID.25.1001	ID.25
1001	2.85284	1	1	wild	BranchStickTwig	-0.276474	ID.25.1001	ID.25
1001	2.85284	1	2	wild	BranchStickTwig	-0.276474	ID.25.1001	ID.25
1001	2.85284	1	2	wild	BranchStickTwig	-0.276474	ID.25.1001	ID.25
1001	2.85284	1	2	wild	BranchStickTwig	-0.276474	ID.25.1001	ID.25
1001	2.85284	1	2	wild	BranchStickTwig	-0.276474	ID.25.1001	ID.25
1001	2.85284	1	1	wild	BranchStickTwig	-0.276474	ID.25.1001	ID.25
1001	2.85284	1	1	wild	dead leaf	-0.276474	ID.25.1001	ID.25
1001	2.85284	1	3	wild	BranchStickTwig	-0.276474	ID.25.1001	ID.25
1001	2.85284	1	1	wild	LeafDeadleaf	-0.276474	ID.25.1001	ID.25
1001	2.85284	1	2	wild	BranchStickTwig	-0.276474	ID.25.1001	ID.25
1001	2.85284	1	1	wild	LeafDeadleaf	-0.276474	ID.25.1001	ID.25
1001	2.85284	1	1	wild	LeafDeadleaf	-0.276474	ID.25.1001	ID.25
1001	2.85284	1	1	wild	BranchStickTwig	-0.276474	ID.25.1001	ID.25
1001	2.85284	1	1	wild	LeafDeadleaf	-0.276474	ID.25.1001	ID.25
1001	2.85284	1	1	wild	BranchStickTwig	-0.276474	ID.25.1001	ID.25
1018	0.867899	1	1	wild	Bark	-1.74484	ID.16.1018	ID.16
1018	0.867899	1	2	wild	Bark	-1.74484	ID.16.1018	ID.16
1018	0.867899	1	1	wild	LeafDeadleaf	-1.74484	ID.16.1018	ID.16
1018	0.867899	1	1	wild	LeafDeadleaf	-1.74484	ID.16.1018	ID.16
1018	0.867899	1	1	wild	LeafDeadleaf	-1.74484	ID.16.1018	ID.16
1018	0.867899	1	1	wild	LeafDeadleaf	-1.74484	ID.16.1018	ID.16
1018	0.867899	1	1	wild	BranchStickTwig	-1.74484	ID.16.1018	ID.16
1018	0.867899	1	1	wild	BranchStickTwig	-1.74484	ID.16.1018	ID.16
1018	0.867899	1	1	wild	BranchStickTwig	-1.74484	ID.16.1018	ID.16
1018	0.867899	1	1	wild	LeafDeadleaf	-1.74484	ID.16.1018	ID.16
1018	0.867899	1	1	wild	LeafDeadleaf	-1.74484	ID.16.1018	ID.16
1018	0.867899	1	2	wild	LeafDeadleaf	-1.74484	ID.16.1018	ID.16
1018	0.867899	1	2	wild	LeafDeadleaf	-1.74484	ID.16.1018	ID.16
1018	0.867899	1	1	wild	BranchStickTwig	-1.74484	ID.16.1018	ID.16
1018	0.867899	1	2	wild	LeafDeadleaf	-1.74484	ID.16.1018	ID.16
1018	0.867899	1	1	wild	LeafDeadleaf	-1.74484	ID.16.1018	ID.16
1018	0.867899	1	1	wild	BranchStickTwig	-1.74484	ID.16.1018	ID.16
1018	0.867899	1	1	wild	dead leaf	-1.74484	ID.16.1018	ID.16
1018	0.867899	1	1	wild	LeafDeadleaf	-1.74484	ID.16.1018	ID.16
1018	0.867899	1	2	wild	LeafDeadleaf	-1.74484	ID.16.1018	ID.16
1018	0.867899	1	2	wild	LeafDeadleaf	-1.74484	ID.16.1018	ID.16
1018	0.867899	1	1	wild	LeafDeadleaf	-1.74484	ID.16.1018	ID.16
1018	0.867899	1	2	wild	LeafDeadleaf	-1.74484	ID.16.1018	ID.16
1018	0.867899	1	2	wild	Bark	-1.74484	ID.16.1018	ID.16
1018	0.867899	1	1	wild	LeafDeadleaf	-1.74484	ID.16.1018	ID.16
1018	0.867899	1	1	wild	LeafDeadleaf	-1.74484	ID.16.1018	ID.16
1018	0.867899	1	2	wild	LeafDeadleaf	-1.74484	ID.16.1018	ID.16
1018	0.867899	1	1	wild	LeafDeadleaf	-1.74484	ID.16.1018	ID.16
1018	0.867899	1	2	wild	LeafDeadleaf	-1.74484	ID.16.1018	ID.16
1018	0.867899	1	1	wild	Bark	-1.74484	ID.16.1018	ID.16
1018	0.867899	1	1	wild	BranchStickTwig	-1.74484	ID.16.1018	ID.16
1018	0.867899	1	1	wild	LeafDeadleaf	-1.74484	ID.16.1018	ID.16
1024	0.876112	1	1	wild	BranchStickTwig	-1.73322	ID.16.1024	ID.16
1024	0.876112	1	1	wild	LeafDeadleaf	-1.73322	ID.16.1024	ID.16
1024	0.876112	1	2	wild	LeafDeadleaf	-1.73322	ID.16.1024	ID.16
1024	0.876112	1	1	wild	LeafDeadleaf	-1.73322	ID.16.1024	ID.16
1024	0.876112	1	1	wild	LeafDeadleaf	-1.73322	ID.16.1024	ID.16
1024	0.876112	1	1	wild	LeafDeadleaf	-1.73322	ID.16.1024	ID.16
1024	0.876112	1	2	wild	LeafDeadleaf	-1.73322	ID.16.1024	ID.16
1024	0.876112	1	1	wild	LeafDeadleaf	-1.73322	ID.16.1024	ID.16
1024	0.876112	1	2	wild	Bark	-1.73322	ID.16.1024	ID.16
1024	0.876112	1	1	wild	LeafDeadleaf	-1.73322	ID.16.1024	ID.16
1024	0.876112	1	1	wild	LeafDeadleaf	-1.73322	ID.16.1024	ID.16
1024	0.876112	1	1	wild	BranchStickTwig	-1.73322	ID.16.1024	ID.16
1024	0.876112	1	1	wild	BranchStickTwig	-1.73322	ID.16.1024	ID.16
1024	0.876112	1	1	wild	LeafDeadleaf	-1.73322	ID.16.1024	ID.16
1024	0.876112	1	1	wild	LeafDeadleaf	-1.73322	ID.16.1024	ID.16
1024	0.876112	1	1	wild	LeafDeadleaf	-1.73322	ID.16.1024	ID.16
1024	0.876112	1	1	wild	LeafDeadleaf	-1.73322	ID.16.1024	ID.16
1024	0.876112	1	1	wild	LeafDeadleaf	-1.73322	ID.16.1024	ID.16
1024	0.876112	1	1	wild	LeafDeadleaf	-1.73322	ID.16.1024	ID.16
1024	0.876112	1	1	wild	BranchStickTwig	-1.73322	ID.16.1024	ID.16
1024	0.876112	1	1	wild	LeafDeadleaf	-1.73322	ID.16.1024	ID.16
1024	0.876112	1	1	wild	BranchStickTwig	-1.73322	ID.16.1024	ID.16
1024	0.876112	1	2	wild	BranchStickTwig	-1.73322	ID.16.1024	ID.16
1024	0.876112	1	1	wild	BranchStickTwig	-1.73322	ID.16.1024	ID.16
1024	0.876112	1	2	wild	BranchStickTwig	-1.73322	ID.16.1024	ID.16
1024	0.876112	1	2	wild	LeafDeadleaf	-1.73322	ID.16.1024	ID.16
1024	0.876112	1	1	wild	BranchStickTwig	-1.73322	ID.16.1024	ID.16
1029	0.881588	1	1	wild	LeafDeadleaf	-1.72553	ID.16.1029	ID.16
1029	0.881588	1	1	wild	LeafDeadleaf	-1.72553	ID.16.1029	ID.16
1029	0.881588	1	2	wild	LeafDeadleaf	-1.72553	ID.16.1029	ID.16
1029	0.881588	1	1	wild	LeafDeadleaf	-1.72553	ID.16.1029	ID.16
1029	0.881588	1	1	wild	BranchStickTwig	-1.72553	ID.16.1029	ID.16
1029	0.881588	1	2	wild	dead leaf	-1.72553	ID.16.1029	ID.16
1029	0.881588	1	2	wild	BranchStickTwig	-1.72553	ID.16.1029	ID.16
1029	0.881588	1	1	wild	Bark	-1.72553	ID.16.1029	ID.16
1029	0.881588	1	1	wild	BranchStickTwig	-1.72553	ID.16.1029	ID.16
1029	0.881588	1	3	wild	Bark	-1.72553	ID.16.1029	ID.16
1029	0.881588	1	1	wild	LeafDeadleaf	-1.72553	ID.16.1029	ID.16
1029	0.881588	1	1	wild	BranchStickTwig	-1.72553	ID.16.1029	ID.16
1029	0.881588	1	1	wild	LeafDeadleaf	-1.72553	ID.16.1029	ID.16
1029	0.881588	1	1	wild	LeafDeadleaf	-1.72553	ID.16.1029	ID.16
1029	0.881588	1	2	wild	LeafDeadleaf	-1.72553	ID.16.1029	ID.16
1029	0.881588	1	1	wild	BranchStickTwig	-1.72553	ID.16.1029	ID.16
1029	0.881588	1	1	wild	Bark	-1.72553	ID.16.1029	ID.16
1029	0.881588	1	1	wild	BranchStickTwig	-1.72553	ID.16.1029	ID.16
1029	0.881588	1	1	wild	LeafDeadleaf	-1.72553	ID.16.1029	ID.16
1029	0.881588	1	3	wild	LeafDeadleaf	-1.72553	ID.16.1029	ID.16
1029	0.881588	1	3	wild	dead leaf	-1.72553	ID.16.1029	ID.16
1029	0.881588	1	2	wild	BranchStickTwig	-1.72553	ID.16.1029	ID.16
1029	0.881588	1	2	wild	LeafDeadleaf	-1.72553	ID.16.1029	ID.16
1029	0.881588	1	1	wild	LeafDeadleaf	-1.72553	ID.16.1029	ID.16
1029	0.881588	1	1	wild	LeafDeadleaf	-1.72553	ID.16.1029	ID.16
1029	0.881588	1	1	wild	LeafDeadleaf	-1.72553	ID.16.1029	ID.16
1029	0.881588	1	2	wild	LeafDeadleaf	-1.72553	ID.16.1029	ID.16
1029	0.881588	1	2	wild	LeafDeadleaf	-1.72553	ID.16.1029	ID.16
1029	0.881588	1	2	wild	LeafDeadleaf	-1.72553	ID.16.1029	ID.16
1029	0.881588	1	1	wild	LeafDeadleaf	-1.72553	ID.16.1029	ID.16
1029	0.881588	1	1	wild	LeafDeadleaf	-1.72553	ID.16.1029	ID.16
1029	0.881588	1	2	wild	Bark	-1.72553	ID.16.1029	ID.16
1029	0.881588	1	2	wild	dead leaf	-1.72553	ID.16.1029	ID.16
1029	0.881588	1	1	wild	dead leaf	-1.72553	ID.16.1029	ID.16
1029	0.881588	1	2	wild	BranchStickTwig	-1.72553	ID.16.1029	ID.16
1029	0.881588	1	2	wild	BranchStickTwig	-1.72553	ID.16.1029	ID.16
1029	0.881588	1	2	wild	LeafDeadleaf	-1.72553	ID.16.1029	ID.16
1029	0.881588	1	2	wild	LeafDeadleaf	-1.72553	ID.16.1029	ID.16
1029	0.881588	1	1	wild	BranchStickTwig	-1.72553	ID.16.1029	ID.16
1029	0.881588	1	1	wild	LeafDeadleaf	-1.72553	ID.16.1029	ID.16
1029	0.881588	1	1	wild	BranchStickTwig	-1.72553	ID.16.1029	ID.16
1029	0.881588	1	2	wild	BranchStickTwig	-1.72553	ID.16.1029	ID.16
1034	0.887064	1	1	wild	LeafDeadleaf	-1.71789	ID.16.1034	ID.16
1034	0.887064	1	2	wild	LeafDeadleaf	-1.71789	ID.16.1034	ID.16
1034	0.887064	1	2	wild	Bark	-1.71789	ID.16.1034	ID.16
1034	0.887064	1	1	wild	LeafDeadleaf	-1.71789	ID.16.1034	ID.16
1034	0.887064	1	1	wild	LeafDeadleaf	-1.71789	ID.16.1034	ID.16
1034	0.887064	1	1	wild	LeafDeadleaf	-1.71789	ID.16.1034	ID.16
1034	0.887064	1	1	wild	LeafDeadleaf	-1.71789	ID.16.1034	ID.16
1034	0.887064	1	2	wild	LeafDeadleaf	-1.71789	ID.16.1034	ID.16
1034	0.887064	1	3	wild	LeafDeadleaf	-1.71789	ID.16.1034	ID.16
1034	0.887064	1	3	wild	LeafDeadleaf	-1.71789	ID.16.1034	ID.16
1034	0.887064	1	1	wild	dead leaf	-1.71789	ID.16.1034	ID.16
1034	0.887064	1	3	wild	LeafDeadleaf	-1.71789	ID.16.1034	ID.16
1034	0.887064	1	1	wild	BranchStickTwig	-1.71789	ID.16.1034	ID.16
1034	0.887064	1	2	wild	LeafDeadleaf	-1.71789	ID.16.1034	ID.16
1034	0.887064	1	3	wild	BranchStickTwig	-1.71789	ID.16.1034	ID.16
1034	0.887064	1	1	wild	LeafDeadleaf	-1.71789	ID.16.1034	ID.16
1034	0.887064	1	1	wild	LeafDeadleaf	-1.71789	ID.16.1034	ID.16
1034	0.887064	1	3	wild	BranchStickTwig	-1.71789	ID.16.1034	ID.16
1034	0.887064	1	2	wild	BranchStickTwig	-1.71789	ID.16.1034	ID.16
1034	0.887064	1	2	wild	LeafDeadleaf	-1.71789	ID.16.1034	ID.16
1034	0.887064	1	2	wild	Bark	-1.71789	ID.16.1034	ID.16
1034	0.887064	1	1	wild	dead leaf	-1.71789	ID.16.1034	ID.16
1034	0.887064	1	2	wild	LeafDeadleaf	-1.71789	ID.16.1034	ID.16
1034	0.887064	1	3	wild	LeafDeadleaf	-1.71789	ID.16.1034	ID.16
1034	0.887064	1	1	wild	dead leaf	-1.71789	ID.16.1034	ID.16
1034	0.887064	1	1	wild	LeafDeadleaf	-1.71789	ID.16.1034	ID.16
1034	0.887064	1	2	wild	BranchStickTwig	-1.71789	ID.16.1034	ID.16
1034	0.887064	1	2	wild	LeafDeadleaf	-1.71789	ID.16.1034	ID.16
1034	0.887064	1	1	wild	BranchStickTwig	-1.71789	ID.16.1034	ID.16
1034	0.887064	1	1	wild	LeafDeadleaf	-1.71789	ID.16.1034	ID.16
1034	0.887064	1	2	wild	BranchStickTwig	-1.71789	ID.16.1034	ID.16
1034	0.887064	1	3	wild	LeafDeadleaf	-1.71789	ID.16.1034	ID.16
1800	6.53525	1	3	wild	Bark	0.746321	ID.25.1800	ID.25
1804	4.87064	1	1	wild	Treetrunk	0.383564	ID.10.1804	ID.10
1804	4.87064	1	2	wild	BranchStickTwig	0.383564	ID.10.1804	ID.10
1828	4.89254	1	1	wild	Bark	0.3891	ID.10.1828	ID.10
1828	4.89254	1	1	wild	Treetrunk	0.3891	ID.10.1828	ID.10
1150	1.58248	1	1	wild	BranchStickTwig	-1.00366	ID.10.1150	ID.10
1150	1.58248	1	2	wild	BranchStickTwig	-1.00366	ID.10.1150	ID.10
1150	1.58248	1	2	wild	BranchStickTwig	-1.00366	ID.10.1150	ID.10
1150	1.58248	1	2	wild	LeafDeadleaf	-1.00366	ID.10.1150	ID.10
1150	1.58248	1	2	wild	BranchStickTwig	-1.00366	ID.10.1150	ID.10
1150	1.58248	1	1	wild	BranchStickTwig	-1.00366	ID.10.1150	ID.10
1150	1.58248	1	2	wild	BranchStickTwig	-1.00366	ID.10.1150	ID.10
1150	1.58248	1	2	wild	BranchStickTwig	-1.00366	ID.10.1150	ID.10
1150	1.58248	1	1	wild	BranchStickTwig	-1.00366	ID.10.1150	ID.10
1150	1.58248	1	1	wild	BranchStickTwig	-1.00366	ID.10.1150	ID.10
1150	1.58248	1	1	wild	BranchStickTwig	-1.00366	ID.10.1150	ID.10
1150	1.58248	1	1	wild	BranchStickTwig	-1.00366	ID.10.1150	ID.10
1150	1.58248	1	2	wild	dead leaf	-1.00366	ID.10.1150	ID.10
1150	1.58248	1	1	wild	LeafDeadleaf	-1.00366	ID.10.1150	ID.10
1150	1.58248	1	2	wild	Bark	-1.00366	ID.10.1150	ID.10
1150	1.58248	1	2	wild	LeafDeadleaf	-1.00366	ID.10.1150	ID.10
1150	1.58248	1	1	wild	dead leaf	-1.00366	ID.10.1150	ID.10
1150	1.58248	1	2	wild	LeafDeadleaf	-1.00366	ID.10.1150	ID.10
1150	1.58248	1	2	wild	LeafDeadleaf	-1.00366	ID.10.1150	ID.10
1150	1.58248	1	2	wild	Bark	-1.00366	ID.10.1150	ID.10
1150	1.58248	1	1	wild	LeafDeadleaf	-1.00366	ID.10.1150	ID.10
1150	1.58248	1	1	wild	BranchStickTwig	-1.00366	ID.10.1150	ID.10
1150	1.58248	1	1	wild	BranchStickTwig	-1.00366	ID.10.1150	ID.10
1150	1.58248	1	1	wild	BranchStickTwig	-1.00366	ID.10.1150	ID.10
1150	1.58248	1	1	wild	dead leaf	-1.00366	ID.10.1150	ID.10
1150	1.58248	1	3	wild	BranchStickTwig	-1.00366	ID.10.1150	ID.10
1150	1.58248	1	1	wild	dead leaf	-1.00366	ID.10.1150	ID.10
1153	1.58522	1	1	wild	Bark	-1.00152	ID.10.1153	ID.10
1153	1.58522	1	2	wild	BranchStickTwig	-1.00152	ID.10.1153	ID.10
1153	1.58522	1	2	wild	dead leaf	-1.00152	ID.10.1153	ID.10
1153	1.58522	1	1	wild	LeafDeadleaf	-1.00152	ID.10.1153	ID.10
1153	1.58522	1	1	wild	BranchStickTwig	-1.00152	ID.10.1153	ID.10
1153	1.58522	1	1	wild	dead leaf	-1.00152	ID.10.1153	ID.10
1153	1.58522	1	1	wild	LeafDeadleaf	-1.00152	ID.10.1153	ID.10
1153	1.58522	1	2	wild	Bark	-1.00152	ID.10.1153	ID.10
1153	1.58522	1	2	wild	LeafDeadleaf	-1.00152	ID.10.1153	ID.10
1153	1.58522	1	3	wild	Bark	-1.00152	ID.10.1153	ID.10
1153	1.58522	1	1	wild	dead leaf	-1.00152	ID.10.1153	ID.10
1153	1.58522	1	1	wild	LeafDeadleaf	-1.00152	ID.10.1153	ID.10
1153	1.58522	1	1	wild	LeafDeadleaf	-1.00152	ID.10.1153	ID.10
1153	1.58522	1	1	wild	LeafDeadleaf	-1.00152	ID.10.1153	ID.10
1153	1.58522	1	1	wild	LeafDeadleaf	-1.00152	ID.10.1153	ID.10
1153	1.58522	1	1	wild	BranchStickTwig	-1.00152	ID.10.1153	ID.10
1153	1.58522	1	2	wild	BranchStickTwig	-1.00152	ID.10.1153	ID.10
1153	1.58522	1	1	wild	LeafDeadleaf	-1.00152	ID.10.1153	ID.10
1153	1.58522	1	1	wild	LeafDeadleaf	-1.00152	ID.10.1153	ID.10
1153	1.58522	1	1	wild	dead leaf	-1.00152	ID.10.1153	ID.10
1153	1.58522	1	2	wild	LeafDeadleaf	-1.00152	ID.10.1153	ID.10
1153	1.58522	1	2	wild	LeafDeadleaf	-1.00152	ID.10.1153	ID.10
1153	1.58522	1	2	wild	Bark	-1.00152	ID.10.1153	ID.10
1153	1.58522	1	3	wild	BranchStickTwig	-1.00152	ID.10.1153	ID.10
1153	1.58522	1	1	wild	LeafDeadleaf	-1.00152	ID.10.1153	ID.10
1153	1.58522	1	4	wild	BranchStickTwig	-1.00152	ID.10.1153	ID.10
1153	1.58522	1	2	wild	BranchStickTwig	-1.00152	ID.10.1153	ID.10
1153	1.58522	1	3	wild	Bark	-1.00152	ID.10.1153	ID.10
1153	1.58522	1	2	wild	BranchStickTwig	-1.00152	ID.10.1153	ID.10
1153	1.58522	1	2	wild	BranchStickTwig	-1.00152	ID.10.1153	ID.10
1153	1.58522	1	3	wild	BranchStickTwig	-1.00152	ID.10.1153	ID.10
1158	1.59069	1	1	wild	LeafDeadleaf	-0.997268	ID.10.1158	ID.10
1158	1.59069	1	2	wild	Bark	-0.997268	ID.10.1158	ID.10
1158	1.59069	1	3	wild	LeafDeadleaf	-0.997268	ID.10.1158	ID.10
1158	1.59069	1	3	wild	BranchStickTwig	-0.997268	ID.10.1158	ID.10
1158	1.59069	1	3	wild	BranchStickTwig	-0.997268	ID.10.1158	ID.10
1158	1.59069	1	2	wild	LeafDeadleaf	-0.997268	ID.10.1158	ID.10
1158	1.59069	1	2	wild	BranchStickTwig	-0.997268	ID.10.1158	ID.10
1158	1.59069	1	1	wild	LeafDeadleaf	-0.997268	ID.10.1158	ID.10
1158	1.59069	1	3	wild	dead leaf	-0.997268	ID.10.1158	ID.10
1158	1.59069	1	2	wild	BranchStickTwig	-0.997268	ID.10.1158	ID.10
1158	1.59069	1	2	wild	BranchStickTwig	-0.997268	ID.10.1158	ID.10
1158	1.59069	1	2	wild	BranchStickTwig	-0.997268	ID.10.1158	ID.10
1158	1.59069	1	2	wild	LeafDeadleaf	-0.997268	ID.10.1158	ID.10
1158	1.59069	1	2	wild	LeafDeadleaf	-0.997268	ID.10.1158	ID.10
1158	1.59069	1	1	wild	Bark	-0.997268	ID.10.1158	ID.10
1158	1.59069	1	1	wild	LeafDeadleaf	-0.997268	ID.10.1158	ID.10
1158	1.59069	1	1	wild	LeafDeadleaf	-0.997268	ID.10.1158	ID.10
1158	1.59069	1	2	wild	LeafDeadleaf	-0.997268	ID.10.1158	ID.10
1158	1.59069	1	2	wild	dead leaf	-0.997268	ID.10.1158	ID.10
1158	1.59069	1	1	wild	LeafDeadleaf	-0.997268	ID.10.1158	ID.10
1158	1.59069	1	1	wild	LeafDeadleaf	-0.997268	ID.10.1158	ID.10
1158	1.59069	1	1	wild	LeafDeadleaf	-0.997268	ID.10.1158	ID.10
1158	1.59069	1	1	wild	LeafDeadleaf	-0.997268	ID.10.1158	ID.10
1158	1.59069	1	1	wild	dead leaf	-0.997268	ID.10.1158	ID.10
1158	1.59069	1	2	wild	LeafDeadleaf	-0.997268	ID.10.1158	ID.10
1160	1.59343	1	2	wild	Treefork	-0.995146	ID.10.1160	ID.10
1160	1.59343	1	2	wild	BranchStickTwig	-0.995146	ID.10.1160	ID.10
1160	1.59343	1	1	wild	BranchStickTwig	-0.995146	ID.10.1160	ID.10
1160	1.59343	1	1	wild	LeafDeadleaf	-0.995146	ID.10.1160	ID.10
1160	1.59343	1	1	wild	LeafDeadleaf	-0.995146	ID.10.1160	ID.10
1160	1.59343	1	1	wild	LeafDeadleaf	-0.995146	ID.10.1160	ID.10
1160	1.59343	1	1	wild	LeafDeadleaf	-0.995146	ID.10.1160	ID.10
1160	1.59343	1	2	wild	LeafDeadleaf	-0.995146	ID.10.1160	ID.10
1160	1.59343	1	1	wild	BranchStickTwig	-0.995146	ID.10.1160	ID.10
1160	1.59343	1	1	wild	BranchStickTwig	-0.995146	ID.10.1160	ID.10
1160	1.59343	1	2	wild	BranchStickTwig	-0.995146	ID.10.1160	ID.10
1160	1.59343	1	1	wild	dead leaf	-0.995146	ID.10.1160	ID.10
1160	1.59343	1	2	wild	BranchStickTwig	-0.995146	ID.10.1160	ID.10
1160	1.59343	1	3	wild	LeafDeadleaf	-0.995146	ID.10.1160	ID.10
1160	1.59343	1	2	wild	LeafDeadleaf	-0.995146	ID.10.1160	ID.10
1160	1.59343	1	1	wild	dead leaf	-0.995146	ID.10.1160	ID.10
1160	1.59343	1	1	wild	BranchStickTwig	-0.995146	ID.10.1160	ID.10
1160	1.59343	1	2	wild	LeafDeadleaf	-0.995146	ID.10.1160	ID.10
1160	1.59343	1	1	wild	LeafDeadleaf	-0.995146	ID.10.1160	ID.10
1160	1.59343	1	1	wild	BranchStickTwig	-0.995146	ID.10.1160	ID.10
1160	1.59343	1	1	wild	LeafDeadleaf	-0.995146	ID.10.1160	ID.10
1160	1.59343	1	2	wild	LeafDeadleaf	-0.995146	ID.10.1160	ID.10
1160	1.59343	1	1	wild	BranchStickTwig	-0.995146	ID.10.1160	ID.10
1160	1.59343	1	2	wild	Treefork	-0.995146	ID.10.1160	ID.10
1160	1.59343	1	1	wild	LeafDeadleaf	-0.995146	ID.10.1160	ID.10
1160	1.59343	1	1	wild	Treefork	-0.995146	ID.10.1160	ID.10
1160	1.59343	1	2	wild	LeafDeadleaf	-0.995146	ID.10.1160	ID.10
1160	1.59343	1	2	wild	Treefork	-0.995146	ID.10.1160	ID.10
1160	1.59343	1	1	wild	LeafDeadleaf	-0.995146	ID.10.1160	ID.10
1160	1.59343	1	1	wild	LeafDeadleaf	-0.995146	ID.10.1160	ID.10
1160	1.59343	1	1	wild	BranchStickTwig	-0.995146	ID.10.1160	ID.10
1194	1.36071	1	2	wild	BranchStickTwig	-1.18996	ID.16.1194	ID.16
1194	1.36071	1	1	wild	BranchStickTwig	-1.18996	ID.16.1194	ID.16
1194	1.36071	1	1	wild	LeafDeadleaf	-1.18996	ID.16.1194	ID.16
1194	1.36071	1	2	wild	LeafDeadleaf	-1.18996	ID.16.1194	ID.16
1194	1.36071	1	2	wild	LeafDeadleaf	-1.18996	ID.16.1194	ID.16
1194	1.36071	1	4	wild	BranchStickTwig	-1.18996	ID.16.1194	ID.16
1194	1.36071	1	1	wild	LeafDeadleaf	-1.18996	ID.16.1194	ID.16
1194	1.36071	1	1	wild	LeafDeadleaf	-1.18996	ID.16.1194	ID.16
1194	1.36071	1	1	wild	LeafDeadleaf	-1.18996	ID.16.1194	ID.16
1194	1.36071	1	1	wild	BranchStickTwig	-1.18996	ID.16.1194	ID.16
1194	1.36071	1	2	wild	LeafDeadleaf	-1.18996	ID.16.1194	ID.16
1194	1.36071	1	2	wild	dead leaf	-1.18996	ID.16.1194	ID.16
1194	1.36071	1	1	wild	LeafDeadleaf	-1.18996	ID.16.1194	ID.16
1194	1.36071	1	2	wild	LeafDeadleaf	-1.18996	ID.16.1194	ID.16
1194	1.36071	1	2	wild	Bark	-1.18996	ID.16.1194	ID.16
1194	1.36071	1	4	wild	LeafDeadleaf	-1.18996	ID.16.1194	ID.16
1194	1.36071	1	4	wild	LeafDeadleaf	-1.18996	ID.16.1194	ID.16
1194	1.36071	1	4	wild	LeafDeadleaf	-1.18996	ID.16.1194	ID.16
1194	1.36071	1	2	wild	BranchStickTwig	-1.18996	ID.16.1194	ID.16
1194	1.36071	1	2	wild	LeafDeadleaf	-1.18996	ID.16.1194	ID.16
1194	1.36071	1	2	wild	dead leaf	-1.18996	ID.16.1194	ID.16
1194	1.36071	1	2	wild	LeafDeadleaf	-1.18996	ID.16.1194	ID.16
1194	1.36071	1	1	wild	LeafDeadleaf	-1.18996	ID.16.1194	ID.16
1211	0.91718	1	1	wild	LeafDeadleaf	-1.67669	ID.7.1211	ID.7
1211	0.91718	1	1	wild	LeafDeadleaf	-1.67669	ID.7.1211	ID.7
1211	0.91718	1	3	wild	LeafDeadleaf	-1.67669	ID.7.1211	ID.7
1211	0.91718	1	1	wild	LeafDeadleaf	-1.67669	ID.7.1211	ID.7
1211	0.91718	1	1	wild	LeafDeadleaf	-1.67669	ID.7.1211	ID.7
1211	0.91718	1	1	wild	Treefork	-1.67669	ID.7.1211	ID.7
1211	0.91718	1	2	wild	LeafDeadleaf	-1.67669	ID.7.1211	ID.7
1211	0.91718	1	2	wild	LeafDeadleaf	-1.67669	ID.7.1211	ID.7
1211	0.91718	1	3	wild	BranchStickTwig	-1.67669	ID.7.1211	ID.7
1211	0.91718	1	4	wild	BranchStickTwig	-1.67669	ID.7.1211	ID.7
1211	0.91718	1	1	wild	LeafDeadleaf	-1.67669	ID.7.1211	ID.7
1211	0.91718	1	2	wild	Bark	-1.67669	ID.7.1211	ID.7
1211	0.91718	1	1	wild	LeafDeadleaf	-1.67669	ID.7.1211	ID.7
1211	0.91718	1	1	wild	LeafDeadleaf	-1.67669	ID.7.1211	ID.7
1211	0.91718	1	1	wild	dead leaf	-1.67669	ID.7.1211	ID.7
1211	0.91718	1	2	wild	BranchStickTwig	-1.67669	ID.7.1211	ID.7
1213	0.919918	1	2	wild	BranchStickTwig	-1.67301	ID.7.1213	ID.7
1213	0.919918	1	1	wild	LeafDeadleaf	-1.67301	ID.7.1213	ID.7
1213	0.919918	1	1	wild	LeafDeadleaf	-1.67301	ID.7.1213	ID.7
1213	0.919918	1	2	wild	BranchStickTwig	-1.67301	ID.7.1213	ID.7
1213	0.919918	1	1	wild	LeafDeadleaf	-1.67301	ID.7.1213	ID.7
1213	0.919918	1	1	wild	BranchStickTwig	-1.67301	ID.7.1213	ID.7
1213	0.919918	1	1	wild	BranchStickTwig	-1.67301	ID.7.1213	ID.7
1213	0.919918	1	1	wild	BranchStickTwig	-1.67301	ID.7.1213	ID.7
1213	0.919918	1	2	wild	Treetrunk	-1.67301	ID.7.1213	ID.7
1213	0.919918	1	2	wild	Treetrunk	-1.67301	ID.7.1213	ID.7
1213	0.919918	1	1	wild	dead leaf	-1.67301	ID.7.1213	ID.7
1213	0.919918	1	1	wild	BranchStickTwig	-1.67301	ID.7.1213	ID.7
1213	0.919918	1	1	wild	Bark	-1.67301	ID.7.1213	ID.7
1213	0.919918	1	1	wild	BranchStickTwig	-1.67301	ID.7.1213	ID.7
1213	0.919918	1	1	wild	LeafDeadleaf	-1.67301	ID.7.1213	ID.7
1213	0.919918	1	3	wild	Bark	-1.67301	ID.7.1213	ID.7
1213	0.919918	1	1	wild	BranchStickTwig	-1.67301	ID.7.1213	ID.7
1213	0.919918	1	1	wild	BranchStickTwig	-1.67301	ID.7.1213	ID.7
1213	0.919918	1	1	wild	BranchStickTwig	-1.67301	ID.7.1213	ID.7
1213	0.919918	1	2	wild	BranchStickTwig	-1.67301	ID.7.1213	ID.7
1213	0.919918	1	1	wild	LeafDeadleaf	-1.67301	ID.7.1213	ID.7
1213	0.919918	1	1	wild	LeafDeadleaf	-1.67301	ID.7.1213	ID.7
1213	0.919918	1	1	wild	dead leaf	-1.67301	ID.7.1213	ID.7
1213	0.919918	1	2	wild	dead leaf	-1.67301	ID.7.1213	ID.7
1213	0.919918	1	2	wild	BranchStickTwig	-1.67301	ID.7.1213	ID.7
1213	0.919918	1	3	wild	LeafDeadleaf	-1.67301	ID.7.1213	ID.7
1213	0.919918	1	1	wild	LeafDeadleaf	-1.67301	ID.7.1213	ID.7
1213	0.919918	1	1	wild	LeafDeadleaf	-1.67301	ID.7.1213	ID.7
1213	0.919918	1	1	wild	LeafDeadleaf	-1.67301	ID.7.1213	ID.7
1213	0.919918	1	1	wild	LeafDeadleaf	-1.67301	ID.7.1213	ID.7
1213	0.919918	1	3	wild	dead leaf	-1.67301	ID.7.1213	ID.7
1213	0.919918	1	1	wild	LeafDeadleaf	-1.67301	ID.7.1213	ID.7
1213	0.919918	1	2	wild	LeafDeadleaf	-1.67301	ID.7.1213	ID.7
1213	0.919918	1	1	wild	Bark	-1.67301	ID.7.1213	ID.7
1213	0.919918	1	1	wild	LeafDeadleaf	-1.67301	ID.7.1213	ID.7
1213	0.919918	1	2	wild	Treefork	-1.67301	ID.7.1213	ID.7
1213	0.919918	1	1	wild	Treefork	-1.67301	ID.7.1213	ID.7
1213	0.919918	1	2	wild	dead leaf	-1.67301	ID.7.1213	ID.7
1213	0.919918	1	1	wild	LeafDeadleaf	-1.67301	ID.7.1213	ID.7
1213	0.919918	1	2	wild	BranchStickTwig	-1.67301	ID.7.1213	ID.7
1213	0.919918	1	1	wild	dead leaf	-1.67301	ID.7.1213	ID.7
1213	0.919918	1	1	wild	LeafDeadleaf	-1.67301	ID.7.1213	ID.7
1213	0.919918	1	2	wild	LeafDeadleaf	-1.67301	ID.7.1213	ID.7
1213	0.919918	1	2	wild	LeafDeadleaf	-1.67301	ID.7.1213	ID.7
1213	0.919918	1	2	wild	LeafDeadleaf	-1.67301	ID.7.1213	ID.7
1213	0.919918	1	2	wild	LeafDeadleaf	-1.67301	ID.7.1213	ID.7
1213	0.919918	1	2	wild	LeafDeadleaf	-1.67301	ID.7.1213	ID.7
1213	0.919918	1	2	wild	LeafDeadleaf	-1.67301	ID.7.1213	ID.7
1217	0.925394	1	1	wild	LeafDeadleaf	-1.66569	ID.7.1217	ID.7
1217	0.925394	1	1	wild	LeafDeadleaf	-1.66569	ID.7.1217	ID.7
1217	0.925394	1	1	wild	LeafDeadleaf	-1.66569	ID.7.1217	ID.7
1217	0.925394	1	2	wild	LeafDeadleaf	-1.66569	ID.7.1217	ID.7
1217	0.925394	1	1	wild	LeafDeadleaf	-1.66569	ID.7.1217	ID.7
1217	0.925394	1	2	wild	LeafDeadleaf	-1.66569	ID.7.1217	ID.7
1217	0.925394	1	1	wild	dead leaf	-1.66569	ID.7.1217	ID.7
1217	0.925394	1	2	wild	BranchStickTwig	-1.66569	ID.7.1217	ID.7
1217	0.925394	1	1	wild	Treefork	-1.66569	ID.7.1217	ID.7
1217	0.925394	1	1	wild	dead leaf	-1.66569	ID.7.1217	ID.7
1217	0.925394	1	1	wild	LeafDeadleaf	-1.66569	ID.7.1217	ID.7
1217	0.925394	1	1	wild	dead leaf	-1.66569	ID.7.1217	ID.7
1217	0.925394	1	3	wild	LeafDeadleaf	-1.66569	ID.7.1217	ID.7
1217	0.925394	1	3	wild	LeafDeadleaf	-1.66569	ID.7.1217	ID.7
1217	0.925394	1	2	wild	Bark	-1.66569	ID.7.1217	ID.7
1217	0.925394	1	2	wild	LeafDeadleaf	-1.66569	ID.7.1217	ID.7
1217	0.925394	1	3	wild	BranchStickTwig	-1.66569	ID.7.1217	ID.7
1217	0.925394	1	2	wild	BranchStickTwig	-1.66569	ID.7.1217	ID.7
1217	0.925394	1	1	wild	LeafDeadleaf	-1.66569	ID.7.1217	ID.7
1217	0.925394	1	1	wild	LeafDeadleaf	-1.66569	ID.7.1217	ID.7
1217	0.925394	1	1	wild	dead leaf	-1.66569	ID.7.1217	ID.7
1217	0.925394	1	1	wild	LeafDeadleaf	-1.66569	ID.7.1217	ID.7
1217	0.925394	1	1	wild	Birdnest	-1.66569	ID.7.1217	ID.7
1217	0.925394	1	2	wild	LeafDeadleaf	-1.66569	ID.7.1217	ID.7
1217	0.925394	1	1	wild	LeafDeadleaf	-1.66569	ID.7.1217	ID.7
1217	0.925394	1	2	wild	LeafDeadleaf	-1.66569	ID.7.1217	ID.7
1217	0.925394	1	1	wild	LeafDeadleaf	-1.66569	ID.7.1217	ID.7
1217	0.925394	1	1	wild	LeafDeadleaf	-1.66569	ID.7.1217	ID.7
1217	0.925394	1	1	wild	Treefork	-1.66569	ID.7.1217	ID.7
1217	0.925394	1	1	wild	LeafDeadleaf	-1.66569	ID.7.1217	ID.7
1217	0.925394	1	2	wild	LeafDeadleaf	-1.66569	ID.7.1217	ID.7
1217	0.925394	1	1	wild	dead leaf	-1.66569	ID.7.1217	ID.7
1217	0.925394	1	1	wild	LeafDeadleaf	-1.66569	ID.7.1217	ID.7
1217	0.925394	1	1	wild	LeafDeadleaf	-1.66569	ID.7.1217	ID.7
1217	0.925394	1	2	wild	LeafDeadleaf	-1.66569	ID.7.1217	ID.7
1217	0.925394	1	2	wild	Bark	-1.66569	ID.7.1217	ID.7
1217	0.925394	1	2	wild	BranchStickTwig	-1.66569	ID.7.1217	ID.7
1217	0.925394	1	2	wild	Treefork	-1.66569	ID.7.1217	ID.7
1217	0.925394	1	1	wild	LeafDeadleaf	-1.66569	ID.7.1217	ID.7
1217	0.925394	1	1	wild	LeafDeadleaf	-1.66569	ID.7.1217	ID.7
1217	0.925394	1	1	wild	dead leaf	-1.66569	ID.7.1217	ID.7
1217	0.925394	1	1	wild	Bark	-1.66569	ID.7.1217	ID.7
1217	0.925394	1	1	wild	LeafDeadleaf	-1.66569	ID.7.1217	ID.7
1217	0.925394	1	1	wild	LeafDeadleaf	-1.66569	ID.7.1217	ID.7
1217	0.925394	1	1	wild	LeafDeadleaf	-1.66569	ID.7.1217	ID.7
1217	0.925394	1	2	wild	LeafDeadleaf	-1.66569	ID.7.1217	ID.7
1219	0.928131	1	1	wild	LeafDeadleaf	-1.66205	ID.7.1219	ID.7
1219	0.928131	1	1	wild	LeafDeadleaf	-1.66205	ID.7.1219	ID.7
1219	0.928131	1	1	wild	Bark	-1.66205	ID.7.1219	ID.7
1219	0.928131	1	1	wild	BranchStickTwig	-1.66205	ID.7.1219	ID.7
1219	0.928131	1	1	wild	LeafDeadleaf	-1.66205	ID.7.1219	ID.7
1219	0.928131	1	2	wild	Bark	-1.66205	ID.7.1219	ID.7
1219	0.928131	1	3	wild	Bark	-1.66205	ID.7.1219	ID.7
1219	0.928131	1	1	wild	LeafDeadleaf	-1.66205	ID.7.1219	ID.7
1219	0.928131	1	1	wild	LeafDeadleaf	-1.66205	ID.7.1219	ID.7
1219	0.928131	1	1	wild	BranchStickTwig	-1.66205	ID.7.1219	ID.7
1219	0.928131	1	1	wild	Bark	-1.66205	ID.7.1219	ID.7
1219	0.928131	1	1	wild	BranchStickTwig	-1.66205	ID.7.1219	ID.7
1219	0.928131	1	1	wild	BranchStickTwig	-1.66205	ID.7.1219	ID.7
1219	0.928131	1	1	wild	BranchStickTwig	-1.66205	ID.7.1219	ID.7
1219	0.928131	1	3	wild	dead leaf	-1.66205	ID.7.1219	ID.7
1219	0.928131	1	1	wild	BranchStickTwig	-1.66205	ID.7.1219	ID.7
1219	0.928131	1	1	wild	Bark	-1.66205	ID.7.1219	ID.7
1219	0.928131	1	1	wild	BranchStickTwig	-1.66205	ID.7.1219	ID.7
1219	0.928131	1	2	wild	BranchStickTwig	-1.66205	ID.7.1219	ID.7
1219	0.928131	1	2	wild	LeafDeadleaf	-1.66205	ID.7.1219	ID.7
1219	0.928131	1	1	wild	LeafDeadleaf	-1.66205	ID.7.1219	ID.7
1219	0.928131	1	2	wild	LeafDeadleaf	-1.66205	ID.7.1219	ID.7
1219	0.928131	1	3	wild	LeafDeadleaf	-1.66205	ID.7.1219	ID.7
1219	0.928131	1	2	wild	BranchStickTwig	-1.66205	ID.7.1219	ID.7
1219	0.928131	1	2	wild	LeafDeadleaf	-1.66205	ID.7.1219	ID.7
1219	0.928131	1	1	wild	BranchStickTwig	-1.66205	ID.7.1219	ID.7
1219	0.928131	1	2	wild	BranchStickTwig	-1.66205	ID.7.1219	ID.7
1219	0.928131	1	3	wild	BranchStickTwig	-1.66205	ID.7.1219	ID.7
1219	0.928131	1	1	wild	Bark	-1.66205	ID.7.1219	ID.7
1219	0.928131	1	2	wild	LeafDeadleaf	-1.66205	ID.7.1219	ID.7
1219	0.928131	1	2	wild	BranchStickTwig	-1.66205	ID.7.1219	ID.7
1219	0.928131	1	1	wild	Bark	-1.66205	ID.7.1219	ID.7
1219	0.928131	1	1	wild	Bark	-1.66205	ID.7.1219	ID.7
1219	0.928131	1	1	wild	Bark	-1.66205	ID.7.1219	ID.7
1219	0.928131	1	1	wild	LeafDeadleaf	-1.66205	ID.7.1219	ID.7
1219	0.928131	1	1	wild	LeafDeadleaf	-1.66205	ID.7.1219	ID.7
1219	0.928131	1	1	wild	BranchStickTwig	-1.66205	ID.7.1219	ID.7
1219	0.928131	1	1	wild	LeafDeadleaf	-1.66205	ID.7.1219	ID.7
1219	0.928131	1	2	wild	BranchStickTwig	-1.66205	ID.7.1219	ID.7
1219	0.928131	1	3	wild	LeafDeadleaf	-1.66205	ID.7.1219	ID.7
1219	0.928131	1	1	wild	LeafDeadleaf	-1.66205	ID.7.1219	ID.7
1219	0.928131	1	1	wild	dead leaf	-1.66205	ID.7.1219	ID.7
1256	3.55921	1	2	wild	LeafDeadleaf	-0.0035027	ID.25.1256	ID.25
1256	3.55921	1	2	wild	LeafDeadleaf	-0.0035027	ID.25.1256	ID.25
1256	3.55921	1	2	wild	Bark	-0.0035027	ID.25.1256	ID.25
1256	3.55921	1	1	wild	Bark	-0.0035027	ID.25.1256	ID.25
1256	3.55921	1	1	wild	dead leaf	-0.0035027	ID.25.1256	ID.25
1256	3.55921	1	2	wild	LeafDeadleaf	-0.0035027	ID.25.1256	ID.25
1256	3.55921	1	2	wild	LeafDeadleaf	-0.0035027	ID.25.1256	ID.25
1256	3.55921	1	1	wild	LeafDeadleaf	-0.0035027	ID.25.1256	ID.25
1256	3.55921	1	2	wild	Bark	-0.0035027	ID.25.1256	ID.25
1256	3.55921	1	2	wild	Bark	-0.0035027	ID.25.1256	ID.25
1256	3.55921	1	1	wild	Bark	-0.0035027	ID.25.1256	ID.25
1256	3.55921	1	2	wild	Bark	-0.0035027	ID.25.1256	ID.25
1256	3.55921	1	1	wild	Bark	-0.0035027	ID.25.1256	ID.25
1256	3.55921	1	1	wild	LeafDeadleaf	-0.0035027	ID.25.1256	ID.25
1256	3.55921	1	3	wild	BranchStickTwig	-0.0035027	ID.25.1256	ID.25
1256	3.55921	1	1	wild	LeafDeadleaf	-0.0035027	ID.25.1256	ID.25
1256	3.55921	1	1	wild	LeafDeadleaf	-0.0035027	ID.25.1256	ID.25
1256	3.55921	1	1	wild	LeafDeadleaf	-0.0035027	ID.25.1256	ID.25
1256	3.55921	1	1	wild	BranchStickTwig	-0.0035027	ID.25.1256	ID.25
1256	3.55921	1	1	wild	LeafDeadleaf	-0.0035027	ID.25.1256	ID.25
1290	3.62218	1	2	wild	Bark	0.0181376	ID.25.1290	ID.25
1290	3.62218	1	1	wild	BranchStickTwig	0.0181376	ID.25.1290	ID.25
1290	3.62218	1	1	wild	LeafDeadleaf	0.0181376	ID.25.1290	ID.25
1290	3.62218	1	1	wild	dead leaf	0.0181376	ID.25.1290	ID.25
1290	3.62218	1	1	wild	BranchStickTwig	0.0181376	ID.25.1290	ID.25
1290	3.62218	1	3	wild	BranchStickTwig	0.0181376	ID.25.1290	ID.25
1290	3.62218	1	1	wild	LeafDeadleaf	0.0181376	ID.25.1290	ID.25
1290	3.62218	1	2	wild	LeafDeadleaf	0.0181376	ID.25.1290	ID.25
1290	3.62218	1	2	wild	LeafDeadleaf	0.0181376	ID.25.1290	ID.25
1290	3.62218	1	2	wild	LeafDeadleaf	0.0181376	ID.25.1290	ID.25
1290	3.62218	1	2	wild	LeafDeadleaf	0.0181376	ID.25.1290	ID.25
1290	3.62218	1	1	wild	LeafDeadleaf	0.0181376	ID.25.1290	ID.25
1290	3.62218	1	1	wild	LeafDeadleaf	0.0181376	ID.25.1290	ID.25
1290	3.62218	1	3	wild	dead leaf	0.0181376	ID.25.1290	ID.25
1290	3.62218	1	2	wild	LeafDeadleaf	0.0181376	ID.25.1290	ID.25
1290	3.62218	1	1	wild	LeafDeadleaf	0.0181376	ID.25.1290	ID.25
1290	3.62218	1	2	wild	LeafDeadleaf	0.0181376	ID.25.1290	ID.25
1290	3.62218	1	1	wild	LeafDeadleaf	0.0181376	ID.25.1290	ID.25
1290	3.62218	1	1	wild	LeafDeadleaf	0.0181376	ID.25.1290	ID.25
1290	3.62218	1	3	wild	LeafDeadleaf	0.0181376	ID.25.1290	ID.25
1290	3.62218	1	1	wild	LeafDeadleaf	0.0181376	ID.25.1290	ID.25
1290	3.62218	1	2	wild	LeafDeadleaf	0.0181376	ID.25.1290	ID.25
1290	3.62218	1	1	wild	BranchStickTwig	0.0181376	ID.25.1290	ID.25
1290	3.62218	1	1	wild	LeafDeadleaf	0.0181376	ID.25.1290	ID.25
1290	3.62218	1	1	wild	BranchStickTwig	0.0181376	ID.25.1290	ID.25
1290	3.62218	1	1	wild	Bark	0.0181376	ID.25.1290	ID.25
1290	3.62218	1	1	wild	LeafDeadleaf	0.0181376	ID.25.1290	ID.25
1294	0.681725	1	1	wild	LeafDeadleaf	-2.04277	ID.22.1294	ID.22
1294	0.681725	1	1	wild	LeafDeadleaf	-2.04277	ID.22.1294	ID.22
1294	0.681725	1	2	wild	LeafDeadleaf	-2.04277	ID.22.1294	ID.22
1294	0.681725	1	2	wild	LeafDeadleaf	-2.04277	ID.22.1294	ID.22
1294	0.681725	1	2	wild	LeafDeadleaf	-2.04277	ID.22.1294	ID.22
1294	0.681725	1	2	wild	LeafDeadleaf	-2.04277	ID.22.1294	ID.22
1294	0.681725	1	4	wild	LeafDeadleaf	-2.04277	ID.22.1294	ID.22
1294	0.681725	1	2	wild	LeafDeadleaf	-2.04277	ID.22.1294	ID.22
1294	0.681725	1	1	wild	LeafDeadleaf	-2.04277	ID.22.1294	ID.22
1294	0.681725	1	4	wild	LeafDeadleaf	-2.04277	ID.22.1294	ID.22
1294	0.681725	1	2	wild	BranchStickTwig	-2.04277	ID.22.1294	ID.22
1294	0.681725	1	1	wild	BranchStickTwig	-2.04277	ID.22.1294	ID.22
1294	0.681725	1	1	wild	BranchStickTwig	-2.04277	ID.22.1294	ID.22
1294	0.681725	1	1	wild	LeafDeadleaf	-2.04277	ID.22.1294	ID.22
1294	0.681725	1	2	wild	LeafDeadleaf	-2.04277	ID.22.1294	ID.22
1294	0.681725	1	2	wild	LeafDeadleaf	-2.04277	ID.22.1294	ID.22
1294	0.681725	1	2	wild	BranchStickTwig	-2.04277	ID.22.1294	ID.22
1294	0.681725	1	2	wild	LeafDeadleaf	-2.04277	ID.22.1294	ID.22
1294	0.681725	1	1	wild	BranchStickTwig	-2.04277	ID.22.1294	ID.22
1294	0.681725	1	1	wild	BranchStickTwig	-2.04277	ID.22.1294	ID.22
1294	0.681725	1	1	wild	LeafDeadleaf	-2.04277	ID.22.1294	ID.22
1294	0.681725	1	1	wild	LeafDeadleaf	-2.04277	ID.22.1294	ID.22
1294	0.681725	1	1	wild	LeafDeadleaf	-2.04277	ID.22.1294	ID.22
1300	0.687201	1	2	wild	dead leaf	-2.0329	ID.22.1300	ID.22
1300	0.687201	1	1	wild	BranchStickTwig	-2.0329	ID.22.1300	ID.22
1300	0.687201	1	2	wild	BranchStickTwig	-2.0329	ID.22.1300	ID.22
1300	0.687201	1	1	wild	dead leaf	-2.0329	ID.22.1300	ID.22
1300	0.687201	1	1	wild	BranchStickTwig	-2.0329	ID.22.1300	ID.22
1300	0.687201	1	1	wild	dead leaf	-2.0329	ID.22.1300	ID.22
1300	0.687201	1	1	wild	LeafDeadleaf	-2.0329	ID.22.1300	ID.22
1300	0.687201	1	2	wild	LeafDeadleaf	-2.0329	ID.22.1300	ID.22
1300	0.687201	1	1	wild	LeafDeadleaf	-2.0329	ID.22.1300	ID.22
1300	0.687201	1	1	wild	BranchStickTwig	-2.0329	ID.22.1300	ID.22
1300	0.687201	1	3	wild	LeafDeadleaf	-2.0329	ID.22.1300	ID.22
1300	0.687201	1	2	wild	LeafDeadleaf	-2.0329	ID.22.1300	ID.22
1300	0.687201	1	2	wild	BranchStickTwig	-2.0329	ID.22.1300	ID.22
1300	0.687201	1	1	wild	LeafDeadleaf	-2.0329	ID.22.1300	ID.22
1300	0.687201	1	2	wild	BranchStickTwig	-2.0329	ID.22.1300	ID.22
1300	0.687201	1	1	wild	LeafDeadleaf	-2.0329	ID.22.1300	ID.22
1300	0.687201	1	1	wild	BranchStickTwig	-2.0329	ID.22.1300	ID.22
1300	0.687201	1	1	wild	LeafDeadleaf	-2.0329	ID.22.1300	ID.22
1300	0.687201	1	1	wild	LeafDeadleaf	-2.0329	ID.22.1300	ID.22
1300	0.687201	1	1	wild	LeafDeadleaf	-2.0329	ID.22.1300	ID.22
1300	0.687201	1	1	wild	BranchStickTwig	-2.0329	ID.22.1300	ID.22
1300	0.687201	1	1	wild	LeafDeadleaf	-2.0329	ID.22.1300	ID.22
1300	0.687201	1	1	wild	LeafDeadleaf	-2.0329	ID.22.1300	ID.22
1300	0.687201	1	1	wild	LeafDeadleaf	-2.0329	ID.22.1300	ID.22
1300	0.687201	1	1	wild	LeafDeadleaf	-2.0329	ID.22.1300	ID.22
1300	0.687201	1	1	wild	LeafDeadleaf	-2.0329	ID.22.1300	ID.22
1300	0.687201	1	2	wild	LeafDeadleaf	-2.0329	ID.22.1300	ID.22
1300	0.687201	1	3	wild	BranchStickTwig	-2.0329	ID.22.1300	ID.22
1300	0.687201	1	1	wild	dead leaf	-2.0329	ID.22.1300	ID.22
1300	0.687201	1	1	wild	LeafDeadleaf	-2.0329	ID.22.1300	ID.22
1300	0.687201	1	1	wild	dead leaf	-2.0329	ID.22.1300	ID.22
1300	0.687201	1	2	wild	LeafDeadleaf	-2.0329	ID.22.1300	ID.22
1307	0.695414	1	1	wild	LeafDeadleaf	-2.01824	ID.22.1307	ID.22
1307	0.695414	1	1	wild	Bark	-2.01824	ID.22.1307	ID.22
1307	0.695414	1	2	wild	BranchStickTwig	-2.01824	ID.22.1307	ID.22
1307	0.695414	1	1	wild	LeafDeadleaf	-2.01824	ID.22.1307	ID.22
1307	0.695414	1	1	wild	BranchStickTwig	-2.01824	ID.22.1307	ID.22
1307	0.695414	1	1	wild	LeafDeadleaf	-2.01824	ID.22.1307	ID.22
1307	0.695414	1	1	wild	LeafDeadleaf	-2.01824	ID.22.1307	ID.22
1307	0.695414	1	1	wild	LeafDeadleaf	-2.01824	ID.22.1307	ID.22
1307	0.695414	1	2	wild	BranchStickTwig	-2.01824	ID.22.1307	ID.22
1307	0.695414	1	2	wild	BranchStickTwig	-2.01824	ID.22.1307	ID.22
1307	0.695414	1	1	wild	Bark	-2.01824	ID.22.1307	ID.22
1307	0.695414	1	1	wild	BranchStickTwig	-2.01824	ID.22.1307	ID.22
1307	0.695414	1	1	wild	LeafDeadleaf	-2.01824	ID.22.1307	ID.22
1307	0.695414	1	2	wild	dead leaf	-2.01824	ID.22.1307	ID.22
1307	0.695414	1	1	wild	LeafDeadleaf	-2.01824	ID.22.1307	ID.22
1307	0.695414	1	1	wild	BranchStickTwig	-2.01824	ID.22.1307	ID.22
1307	0.695414	1	1	wild	BranchStickTwig	-2.01824	ID.22.1307	ID.22
1307	0.695414	1	2	wild	BranchStickTwig	-2.01824	ID.22.1307	ID.22
1307	0.695414	1	2	wild	LeafDeadleaf	-2.01824	ID.22.1307	ID.22
1307	0.695414	1	1	wild	BranchStickTwig	-2.01824	ID.22.1307	ID.22
1307	0.695414	1	2	wild	BranchStickTwig	-2.01824	ID.22.1307	ID.22
1307	0.695414	1	1	wild	LeafDeadleaf	-2.01824	ID.22.1307	ID.22
1307	0.695414	1	1	wild	LeafDeadleaf	-2.01824	ID.22.1307	ID.22
1290	3.62218	1	1	wild	BranchStickTwig	0.0181376	ID.25.1290	ID.25
1670	4.27652	1	3	wild	BranchStickTwig	0.22305	ID.16.1670	ID.16
1670	4.27652	1	1	wild	BranchStickTwig	0.22305	ID.16.1670	ID.16
1670	4.27652	1	2	wild	LeafDeadleaf	0.22305	ID.16.1670	ID.16
1670	4.27652	1	2	wild	Treefork	0.22305	ID.16.1670	ID.16
1670	4.27652	1	1	wild	BranchStickTwig	0.22305	ID.16.1670	ID.16
1670	4.27652	1	2	wild	LeafDeadleaf	0.22305	ID.16.1670	ID.16
1670	4.27652	1	2	wild	dead leaf	0.22305	ID.16.1670	ID.16
1670	4.27652	1	2	wild	LeafDeadleaf	0.22305	ID.16.1670	ID.16
1670	4.27652	1	2	wild	LeafDeadleaf	0.22305	ID.16.1670	ID.16
1670	4.27652	1	1	wild	Bark	0.22305	ID.16.1670	ID.16
1670	4.27652	1	3	wild	Bark	0.22305	ID.16.1670	ID.16
1670	4.27652	1	2	wild	BranchStickTwig	0.22305	ID.16.1670	ID.16
1670	4.27652	1	2	wild	LeafDeadleaf	0.22305	ID.16.1670	ID.16
1670	4.27652	1	2	wild	LeafDeadleaf	0.22305	ID.16.1670	ID.16
1670	4.27652	1	2	wild	Treefork	0.22305	ID.16.1670	ID.16
1670	4.27652	1	2	wild	Bark	0.22305	ID.16.1670	ID.16
1670	4.27652	1	2	wild	LeafDeadleaf	0.22305	ID.16.1670	ID.16
1670	4.27652	1	1	wild	Treefork	0.22305	ID.16.1670	ID.16
1670	4.27652	1	2	wild	Bark	0.22305	ID.16.1670	ID.16
1670	4.27652	1	1	wild	Bark	0.22305	ID.16.1670	ID.16
1670	4.27652	1	1	wild	Wood	0.22305	ID.16.1670	ID.16
1670	4.27652	1	2	wild	LeafDeadleaf	0.22305	ID.16.1670	ID.16
1670	4.27652	1	2	wild	BranchStickTwig	0.22305	ID.16.1670	ID.16
1670	4.27652	1	1	wild	Bark	0.22305	ID.16.1670	ID.16
1670	4.27652	1	1	wild	LeafDeadleaf	0.22305	ID.16.1670	ID.16
1670	4.27652	1	1	wild	LeafDeadleaf	0.22305	ID.16.1670	ID.16
1670	4.27652	1	1	wild	BranchStickTwig	0.22305	ID.16.1670	ID.16
1670	4.27652	1	2	wild	Treefork	0.22305	ID.16.1670	ID.16
1670	4.27652	1	2	wild	BranchStickTwig	0.22305	ID.16.1670	ID.16
1670	4.27652	1	2	wild	BranchStickTwig	0.22305	ID.16.1670	ID.16
1670	4.27652	1	1	wild	LeafDeadleaf	0.22305	ID.16.1670	ID.16
1670	4.27652	1	1	wild	BranchStickTwig	0.22305	ID.16.1670	ID.16
1670	4.27652	1	1	wild	BranchStickTwig	0.22305	ID.16.1670	ID.16
1670	4.27652	1	2	wild	BranchStickTwig	0.22305	ID.16.1670	ID.16
1670	4.27652	1	1	wild	Bark	0.22305	ID.16.1670	ID.16
1670	4.27652	1	1	wild	BranchStickTwig	0.22305	ID.16.1670	ID.16
1674	4.27926	1	1	wild	BranchStickTwig	0.223839	ID.16.1674	ID.16
1674	4.27926	1	1	wild	Treefork	0.223839	ID.16.1674	ID.16
1674	4.27926	1	1	wild	dead leaf	0.223839	ID.16.1674	ID.16
1674	4.27926	1	1	wild	BranchStickTwig	0.223839	ID.16.1674	ID.16
1674	4.27926	1	2	wild	BranchStickTwig	0.223839	ID.16.1674	ID.16
1674	4.27926	1	1	wild	LeafDeadleaf	0.223839	ID.16.1674	ID.16
1674	4.27926	1	1	wild	Bark	0.223839	ID.16.1674	ID.16
1674	4.27926	1	1	wild	BranchStickTwig	0.223839	ID.16.1674	ID.16
1674	4.27926	1	1	wild	BranchStickTwig	0.223839	ID.16.1674	ID.16
1674	4.27926	1	3	wild	Treefork	0.223839	ID.16.1674	ID.16
1674	4.27926	1	1	wild	LeafDeadleaf	0.223839	ID.16.1674	ID.16
1674	4.27926	1	1	wild	LeafDeadleaf	0.223839	ID.16.1674	ID.16
1674	4.27926	1	2	wild	LeafDeadleaf	0.223839	ID.16.1674	ID.16
1674	4.27926	1	2	wild	BranchStickTwig	0.223839	ID.16.1674	ID.16
1674	4.27926	1	1	wild	LeafDeadleaf	0.223839	ID.16.1674	ID.16
1674	4.27926	1	1	wild	Bark	0.223839	ID.16.1674	ID.16
1674	4.27926	1	2	wild	LeafDeadleaf	0.223839	ID.16.1674	ID.16
1674	4.27926	1	1	wild	LeafDeadleaf	0.223839	ID.16.1674	ID.16
1674	4.27926	1	1	wild	BranchStickTwig	0.223839	ID.16.1674	ID.16
1674	4.27926	1	1	wild	BranchStickTwig	0.223839	ID.16.1674	ID.16
1674	4.27926	1	4	wild	LeafDeadleaf	0.223839	ID.16.1674	ID.16
1674	4.27926	1	3	wild	BranchStickTwig	0.223839	ID.16.1674	ID.16
1674	4.27926	1	2	wild	BranchStickTwig	0.223839	ID.16.1674	ID.16
1674	4.27926	1	2	wild	BranchStickTwig	0.223839	ID.16.1674	ID.16
1674	4.27926	1	1	wild	dead leaf	0.223839	ID.16.1674	ID.16
1674	4.27926	1	1	wild	BranchStickTwig	0.223839	ID.16.1674	ID.16
1674	4.27926	1	2	wild	LeafDeadleaf	0.223839	ID.16.1674	ID.16
1674	4.27926	1	2	wild	BranchStickTwig	0.223839	ID.16.1674	ID.16
1674	4.27926	1	1	wild	BranchStickTwig	0.223839	ID.16.1674	ID.16
1674	4.27926	1	2	wild	BranchStickTwig	0.223839	ID.16.1674	ID.16
1674	4.27926	1	2	wild	BranchStickTwig	0.223839	ID.16.1674	ID.16
1674	4.27926	1	1	wild	dead leaf	0.223839	ID.16.1674	ID.16
1674	4.27926	1	1	wild	BranchStickTwig	0.223839	ID.16.1674	ID.16
1674	4.27926	1	1	wild	BranchStickTwig	0.223839	ID.16.1674	ID.16
1674	4.27926	1	1	wild	BranchStickTwig	0.223839	ID.16.1674	ID.16
1674	4.27926	1	4	wild	BranchStickTwig	0.223839	ID.16.1674	ID.16
1674	4.27926	1	3	wild	BranchStickTwig	0.223839	ID.16.1674	ID.16
1674	4.27926	1	2	wild	BranchStickTwig	0.223839	ID.16.1674	ID.16
1674	4.27926	1	1	wild	Treefork	0.223839	ID.16.1674	ID.16
1676	4.282	1	1	wild	Bark	0.224629	ID.16.1676	ID.16
1676	4.282	1	2	wild	Treefork	0.224629	ID.16.1676	ID.16
1676	4.282	1	3	wild	BranchStickTwig	0.224629	ID.16.1676	ID.16
1676	4.282	1	1	wild	LeafDeadleaf	0.224629	ID.16.1676	ID.16
1676	4.282	1	1	wild	BranchStickTwig	0.224629	ID.16.1676	ID.16
1676	4.282	1	2	wild	BranchStickTwig	0.224629	ID.16.1676	ID.16
1676	4.282	1	1	wild	LeafDeadleaf	0.224629	ID.16.1676	ID.16
1676	4.282	1	2	wild	Bark	0.224629	ID.16.1676	ID.16
1680	4.28747	1	4	wild	LeafDeadleaf	0.226205	ID.16.1680	ID.16
1680	4.28747	1	1	wild	LeafDeadleaf	0.226205	ID.16.1680	ID.16
1680	4.28747	1	2	wild	Bark	0.226205	ID.16.1680	ID.16
1680	4.28747	1	2	wild	LeafDeadleaf	0.226205	ID.16.1680	ID.16
1680	4.28747	1	1	wild	BranchStickTwig	0.226205	ID.16.1680	ID.16
1680	4.28747	1	1	wild	Treefork	0.226205	ID.16.1680	ID.16
1680	4.28747	1	2	wild	Bark	0.226205	ID.16.1680	ID.16
1680	4.28747	1	2	wild	BranchStickTwig	0.226205	ID.16.1680	ID.16
1680	4.28747	1	1	wild	LeafDeadleaf	0.226205	ID.16.1680	ID.16
1680	4.28747	1	2	wild	LeafDeadleaf	0.226205	ID.16.1680	ID.16
1680	4.28747	1	2	wild	LeafDeadleaf	0.226205	ID.16.1680	ID.16
1680	4.28747	1	2	wild	dead leaf	0.226205	ID.16.1680	ID.16
1680	4.28747	1	1	wild	BranchStickTwig	0.226205	ID.16.1680	ID.16
1680	4.28747	1	3	wild	BranchStickTwig	0.226205	ID.16.1680	ID.16
1680	4.28747	1	2	wild	Bark	0.226205	ID.16.1680	ID.16
1680	4.28747	1	3	wild	Bark	0.226205	ID.16.1680	ID.16
1680	4.28747	1	1	wild	dead leaf	0.226205	ID.16.1680	ID.16
1680	4.28747	1	1	wild	LeafDeadleaf	0.226205	ID.16.1680	ID.16
1680	4.28747	1	1	wild	BranchStickTwig	0.226205	ID.16.1680	ID.16
1680	4.28747	1	1	wild	BranchStickTwig	0.226205	ID.16.1680	ID.16
1680	4.28747	1	2	wild	Treetrunk	0.226205	ID.16.1680	ID.16
1680	4.28747	1	1	wild	BranchStickTwig	0.226205	ID.16.1680	ID.16
1680	4.28747	1	1	wild	LeafDeadleaf	0.226205	ID.16.1680	ID.16
1680	4.28747	1	1	wild	dead leaf	0.226205	ID.16.1680	ID.16
1680	4.28747	1	1	wild	Bark	0.226205	ID.16.1680	ID.16
1682	4.29021	1	1	wild	LeafDeadleaf	0.226993	ID.16.1682	ID.16
1682	4.29021	1	1	wild	Bark	0.226993	ID.16.1682	ID.16
1682	4.29021	1	1	wild	BranchStickTwig	0.226993	ID.16.1682	ID.16
1682	4.29021	1	1	wild	BranchStickTwig	0.226993	ID.16.1682	ID.16
1682	4.29021	1	5	wild	Bark	0.226993	ID.16.1682	ID.16
1682	4.29021	1	5	wild	Bark	0.226993	ID.16.1682	ID.16
1682	4.29021	1	5	wild	Bark	0.226993	ID.16.1682	ID.16
1682	4.29021	1	1	wild	dead leaf	0.226993	ID.16.1682	ID.16
1682	4.29021	1	2	wild	BranchStickTwig	0.226993	ID.16.1682	ID.16
1682	4.29021	1	3	wild	BranchStickTwig	0.226993	ID.16.1682	ID.16
1682	4.29021	1	2	wild	BranchStickTwig	0.226993	ID.16.1682	ID.16
1682	4.29021	1	1	wild	LeafDeadleaf	0.226993	ID.16.1682	ID.16
1682	4.29021	1	1	wild	LeafDeadleaf	0.226993	ID.16.1682	ID.16
1682	4.29021	1	2	wild	BranchStickTwig	0.226993	ID.16.1682	ID.16
1682	4.29021	1	2	wild	LeafDeadleaf	0.226993	ID.16.1682	ID.16
1682	4.29021	1	2	wild	LeafDeadleaf	0.226993	ID.16.1682	ID.16
1684	4.30938	1	1	wild	LeafDeadleaf	0.232493	ID.16.1684	ID.16
1684	4.30938	1	2	wild	BranchStickTwig	0.232493	ID.16.1684	ID.16
1684	4.30938	1	2	wild	BranchStickTwig	0.232493	ID.16.1684	ID.16
1684	4.30938	1	2	wild	LeafDeadleaf	0.232493	ID.16.1684	ID.16
1684	4.30938	1	2	wild	LeafDeadleaf	0.232493	ID.16.1684	ID.16
1684	4.30938	1	1	wild	BranchStickTwig	0.232493	ID.16.1684	ID.16
1684	4.30938	1	3	wild	LeafDeadleaf	0.232493	ID.16.1684	ID.16
1686	4.31212	1	1	wild	Bark	0.233277	ID.16.1686	ID.16
1686	4.31212	1	1	wild	BranchStickTwig	0.233277	ID.16.1686	ID.16
1686	4.31212	1	1	wild	BranchStickTwig	0.233277	ID.16.1686	ID.16
1686	4.31212	1	1	wild	BranchStickTwig	0.233277	ID.16.1686	ID.16
1686	4.31212	1	1	wild	BranchStickTwig	0.233277	ID.16.1686	ID.16
1686	4.31212	1	2	wild	BranchStickTwig	0.233277	ID.16.1686	ID.16
1686	4.31212	1	1	wild	BranchStickTwig	0.233277	ID.16.1686	ID.16
1686	4.31212	1	1	wild	Bark	0.233277	ID.16.1686	ID.16
1686	4.31212	1	1	wild	LeafDeadleaf	0.233277	ID.16.1686	ID.16
1686	4.31212	1	4	wild	Bark	0.233277	ID.16.1686	ID.16
1686	4.31212	1	4	wild	Bark	0.233277	ID.16.1686	ID.16
1686	4.31212	1	2	wild	BranchStickTwig	0.233277	ID.16.1686	ID.16
1686	4.31212	1	2	wild	Treefork	0.233277	ID.16.1686	ID.16
1686	4.31212	1	2	wild	Treefork	0.233277	ID.16.1686	ID.16
1686	4.31212	1	1	wild	BranchStickTwig	0.233277	ID.16.1686	ID.16
1686	4.31212	1	1	wild	BranchStickTwig	0.233277	ID.16.1686	ID.16
1686	4.31212	1	1	wild	BranchStickTwig	0.233277	ID.16.1686	ID.16
1686	4.31212	1	2	wild	LeafDeadleaf	0.233277	ID.16.1686	ID.16
1686	4.31212	1	2	wild	Bark	0.233277	ID.16.1686	ID.16
1686	4.31212	1	2	wild	Bark	0.233277	ID.16.1686	ID.16
1686	4.31212	1	1	wild	Bark	0.233277	ID.16.1686	ID.16
1686	4.31212	1	2	wild	BranchStickTwig	0.233277	ID.16.1686	ID.16
1686	4.31212	1	2	wild	BranchStickTwig	0.233277	ID.16.1686	ID.16
1686	4.31212	1	1	wild	Treefork	0.233277	ID.16.1686	ID.16
1686	4.31212	1	3	wild	LeafDeadleaf	0.233277	ID.16.1686	ID.16
1686	4.31212	1	1	wild	LeafDeadleaf	0.233277	ID.16.1686	ID.16
1688	4.31485	1	1	wild	LeafDeadleaf	0.23406	ID.16.1688	ID.16
1688	4.31485	1	1	wild	BranchStickTwig	0.23406	ID.16.1688	ID.16
1688	4.31485	1	1	wild	LeafDeadleaf	0.23406	ID.16.1688	ID.16
1688	4.31485	1	1	wild	BranchStickTwig	0.23406	ID.16.1688	ID.16
1688	4.31485	1	2	wild	LeafDeadleaf	0.23406	ID.16.1688	ID.16
1688	4.31485	1	3	wild	BranchStickTwig	0.23406	ID.16.1688	ID.16
1688	4.31485	1	2	wild	dead leaf	0.23406	ID.16.1688	ID.16
1688	4.31485	1	1	wild	LeafDeadleaf	0.23406	ID.16.1688	ID.16
1688	4.31485	1	3	wild	BranchStickTwig	0.23406	ID.16.1688	ID.16
1688	4.31485	1	1	wild	BranchStickTwig	0.23406	ID.16.1688	ID.16
1688	4.31485	1	1	wild	Treetrunk	0.23406	ID.16.1688	ID.16
1688	4.31485	1	2	wild	BranchStickTwig	0.23406	ID.16.1688	ID.16
1688	4.31485	1	1	wild	dead leaf	0.23406	ID.16.1688	ID.16
1688	4.31485	1	2	wild	LeafDeadleaf	0.23406	ID.16.1688	ID.16
1688	4.31485	1	2	wild	Bark	0.23406	ID.16.1688	ID.16
1688	4.31485	1	2	wild	Bark	0.23406	ID.16.1688	ID.16
1688	4.31485	1	3	wild	Treetrunk	0.23406	ID.16.1688	ID.16
1688	4.31485	1	2	wild	Treetrunk	0.23406	ID.16.1688	ID.16
1688	4.31485	1	1	wild	Bark	0.23406	ID.16.1688	ID.16
1688	4.31485	1	2	wild	BranchStickTwig	0.23406	ID.16.1688	ID.16
1688	4.31485	1	1	wild	BranchStickTwig	0.23406	ID.16.1688	ID.16
1688	4.31485	1	1	wild	BranchStickTwig	0.23406	ID.16.1688	ID.16
1688	4.31485	1	1	wild	BranchStickTwig	0.23406	ID.16.1688	ID.16
1688	4.31485	1	2	wild	BranchStickTwig	0.23406	ID.16.1688	ID.16
1688	4.31485	1	1	wild	BranchStickTwig	0.23406	ID.16.1688	ID.16
1688	4.31485	1	2	wild	LeafDeadleaf	0.23406	ID.16.1688	ID.16
1688	4.31485	1	2	wild	LeafDeadleaf	0.23406	ID.16.1688	ID.16
1688	4.31485	1	2	wild	BranchStickTwig	0.23406	ID.16.1688	ID.16
1688	4.31485	1	1	wild	BranchStickTwig	0.23406	ID.16.1688	ID.16
1688	4.31485	1	2	wild	BranchStickTwig	0.23406	ID.16.1688	ID.16
1688	4.31485	1	1	wild	BranchStickTwig	0.23406	ID.16.1688	ID.16
1688	4.31485	1	3	wild	LeafDeadleaf	0.23406	ID.16.1688	ID.16
1688	4.31485	1	4	wild	BranchStickTwig	0.23406	ID.16.1688	ID.16
1688	4.31485	1	1	wild	BranchStickTwig	0.23406	ID.16.1688	ID.16
1688	4.31485	1	2	wild	BranchStickTwig	0.23406	ID.16.1688	ID.16
1688	4.31485	1	2	wild	Bark	0.23406	ID.16.1688	ID.16
1688	4.31485	1	1	wild	Treefork	0.23406	ID.16.1688	ID.16
1836	4.90349	1	1	wild	Treetrunk	0.391859	ID.10.1836	ID.10
1688	4.31485	1	2	wild	LeafDeadleaf	0.23406	ID.16.1688	ID.16
1688	4.31485	1	2	wild	LeafDeadleaf	0.23406	ID.16.1688	ID.16
1839	4.90623	1	1	wild	Treetrunk	0.392548	ID.10.1839	ID.10
1688	4.31485	1	2	wild	Bark	0.23406	ID.16.1688	ID.16
1688	4.31485	1	1	wild	BranchStickTwig	0.23406	ID.16.1688	ID.16
1688	4.31485	1	1	wild	BranchStickTwig	0.23406	ID.16.1688	ID.16
1688	4.31485	1	2	wild	BranchStickTwig	0.23406	ID.16.1688	ID.16
1688	4.31485	1	1	wild	BranchStickTwig	0.23406	ID.16.1688	ID.16
1688	4.31485	1	2	wild	Treefork	0.23406	ID.16.1688	ID.16
1688	4.31485	1	2	wild	BranchStickTwig	0.23406	ID.16.1688	ID.16
1688	4.31485	1	1	wild	BranchStickTwig	0.23406	ID.16.1688	ID.16
1688	4.31485	1	1	wild	BranchStickTwig	0.23406	ID.16.1688	ID.16
1839	4.90623	1	1	wild	BranchStickTwig	0.392548	ID.10.1839	ID.10
1290	3.62218	1	2	wild	LeafDeadleaf	0.0181376	ID.25.1290	ID.25
1695	4.67077	1	2	wild	Treefork	0.331862	ID.10.1695	ID.10
1695	4.67077	1	2	wild	LeafDeadleaf	0.331862	ID.10.1695	ID.10
1695	4.67077	1	3	wild	LeafDeadleaf	0.331862	ID.10.1695	ID.10
1695	4.67077	1	1	wild	BranchStickTwig	0.331862	ID.10.1695	ID.10
1695	4.67077	1	1	wild	BranchStickTwig	0.331862	ID.10.1695	ID.10
1695	4.67077	1	1	wild	BranchStickTwig	0.331862	ID.10.1695	ID.10
1695	4.67077	1	1	wild	BranchStickTwig	0.331862	ID.10.1695	ID.10
1695	4.67077	1	1	wild	BranchStickTwig	0.331862	ID.10.1695	ID.10
1695	4.67077	1	1	wild	dead leaf	0.331862	ID.10.1695	ID.10
1695	4.67077	1	1	wild	BranchStickTwig	0.331862	ID.10.1695	ID.10
1695	4.67077	1	4	wild	BranchStickTwig	0.331862	ID.10.1695	ID.10
1695	4.67077	1	1	wild	dead leaf	0.331862	ID.10.1695	ID.10
1695	4.67077	1	2	wild	Bark	0.331862	ID.10.1695	ID.10
1695	4.67077	1	1	wild	BranchStickTwig	0.331862	ID.10.1695	ID.10
1695	4.67077	1	2	wild	BranchStickTwig	0.331862	ID.10.1695	ID.10
1695	4.67077	1	1	wild	BranchStickTwig	0.331862	ID.10.1695	ID.10
1695	4.67077	1	2	wild	dead leaf	0.331862	ID.10.1695	ID.10
1695	4.67077	1	2	wild	BranchStickTwig	0.331862	ID.10.1695	ID.10
1695	4.67077	1	1	wild	BranchStickTwig	0.331862	ID.10.1695	ID.10
1695	4.67077	1	2	wild	BranchStickTwig	0.331862	ID.10.1695	ID.10
1695	4.67077	1	1	wild	Bark	0.331862	ID.10.1695	ID.10
1695	4.67077	1	2	wild	BranchStickTwig	0.331862	ID.10.1695	ID.10
1695	4.67077	1	2	wild	BranchStickTwig	0.331862	ID.10.1695	ID.10
1695	4.67077	1	3	wild	BranchStickTwig	0.331862	ID.10.1695	ID.10
1695	4.67077	1	3	wild	BranchStickTwig	0.331862	ID.10.1695	ID.10
1695	4.67077	1	2	wild	BranchStickTwig	0.331862	ID.10.1695	ID.10
1695	4.67077	1	2	wild	BranchStickTwig	0.331862	ID.10.1695	ID.10
1695	4.67077	1	3	wild	BranchStickTwig	0.331862	ID.10.1695	ID.10
1695	4.67077	1	2	wild	Bark	0.331862	ID.10.1695	ID.10
1695	4.67077	1	3	wild	BranchStickTwig	0.331862	ID.10.1695	ID.10
1695	4.67077	1	2	wild	Bark	0.331862	ID.10.1695	ID.10
1695	4.67077	1	2	wild	BranchStickTwig	0.331862	ID.10.1695	ID.10
1695	4.67077	1	1	wild	BranchStickTwig	0.331862	ID.10.1695	ID.10
1290	3.62218	1	1	wild	BranchStickTwig	0.0181376	ID.25.1290	ID.25
1844	6.58179	1	1	wild	Bark	0.755077	ID.25.1844	ID.25
1701	6.36003	1	1	wild	Treefork	0.712785	ID.25.1701	ID.25
1703	6.36276	1	2	wild	Bark	0.713316	ID.25.1703	ID.25
1855	2.39288	1	1	wild	BranchStickTwig	-0.493419	ID.21.1855	ID.21
1731	4.82135	1	1	wild	BranchStickTwig	0.371015	ID.10.1731	ID.10
1731	4.82135	1	1	wild	BranchStickTwig	0.371015	ID.10.1731	ID.10
1731	4.82135	1	1	wild	BranchStickTwig	0.371015	ID.10.1731	ID.10
1731	4.82135	1	2	wild	Bark	0.371015	ID.10.1731	ID.10
1731	4.82135	1	3	wild	Bark	0.371015	ID.10.1731	ID.10
1731	4.82135	1	2	wild	Bark	0.371015	ID.10.1731	ID.10
1731	4.82135	1	2	wild	BranchStickTwig	0.371015	ID.10.1731	ID.10
1731	4.82135	1	2	wild	BranchStickTwig	0.371015	ID.10.1731	ID.10
1731	4.82135	1	1	wild	BranchStickTwig	0.371015	ID.10.1731	ID.10
1731	4.82135	1	2	wild	BranchStickTwig	0.371015	ID.10.1731	ID.10
1731	4.82135	1	2	wild	BranchStickTwig	0.371015	ID.10.1731	ID.10
1731	4.82135	1	2	wild	BranchStickTwig	0.371015	ID.10.1731	ID.10
1731	4.82135	1	1	wild	Bark	0.371015	ID.10.1731	ID.10
1731	4.82135	1	2	wild	Treefork	0.371015	ID.10.1731	ID.10
1731	4.82135	1	1	wild	BranchStickTwig	0.371015	ID.10.1731	ID.10
1731	4.82135	1	1	wild	Bark	0.371015	ID.10.1731	ID.10
1731	52.0684	1	2	wild	Bark	3.30715	ID.38.1731	ID.38
1731	4.82135	1	4	wild	Bark	0.371015	ID.10.1731	ID.10
1731	4.82135	1	4	wild	Bark	0.371015	ID.10.1731	ID.10
1731	4.82135	1	1	wild	LeafDeadleaf	0.371015	ID.10.1731	ID.10
1731	4.82135	1	2	wild	Bark	0.371015	ID.10.1731	ID.10
1731	4.82135	1	1	wild	LeafDeadleaf	0.371015	ID.10.1731	ID.10
1733	4.82409	1	3	wild	Bark	0.371716	ID.10.1733	ID.10
1733	4.82409	1	2	wild	BranchStickTwig	0.371716	ID.10.1733	ID.10
1733	4.82409	1	1	wild	Bark	0.371716	ID.10.1733	ID.10
1733	4.82409	1	2	wild	BranchStickTwig	0.371716	ID.10.1733	ID.10
1733	4.82409	1	1	wild	LeafDeadleaf	0.371716	ID.10.1733	ID.10
1733	4.82409	1	1	wild	dead leaf	0.371716	ID.10.1733	ID.10
1733	4.82409	1	3	wild	Bark	0.371716	ID.10.1733	ID.10
1733	4.82409	1	3	wild	Bark	0.371716	ID.10.1733	ID.10
1733	4.82409	1	1	wild	BranchStickTwig	0.371716	ID.10.1733	ID.10
1733	4.82409	1	2	wild	Bark	0.371716	ID.10.1733	ID.10
1733	4.82409	1	3	wild	Bark	0.371716	ID.10.1733	ID.10
1733	4.82409	1	3	wild	Bark	0.371716	ID.10.1733	ID.10
1733	4.82409	1	2	wild	BranchStickTwig	0.371716	ID.10.1733	ID.10
1740	6.49418	1	3	wild	BranchStickTwig	0.738542	ID.25.1740	ID.25
1740	6.49418	1	2	wild	BranchStickTwig	0.738542	ID.25.1740	ID.25
1740	6.49418	1	3	wild	BranchStickTwig	0.738542	ID.25.1740	ID.25
1740	6.49418	1	3	wild	BranchStickTwig	0.738542	ID.25.1740	ID.25
1740	6.49418	1	2	wild	BranchStickTwig	0.738542	ID.25.1740	ID.25
1740	6.49418	1	1	wild	BranchStickTwig	0.738542	ID.25.1740	ID.25
1740	6.49418	1	1	wild	BranchStickTwig	0.738542	ID.25.1740	ID.25
1740	6.49418	1	5	wild	BranchStickTwig	0.738542	ID.25.1740	ID.25
1740	6.49418	1	2	wild	BranchStickTwig	0.738542	ID.25.1740	ID.25
1740	6.49418	1	3	wild	LeafDeadleaf	0.738542	ID.25.1740	ID.25
1740	6.49418	1	2	wild	Bark	0.738542	ID.25.1740	ID.25
1740	6.49418	1	3	wild	BranchStickTwig	0.738542	ID.25.1740	ID.25
1740	6.49418	1	3	wild	BranchStickTwig	0.738542	ID.25.1740	ID.25
1740	6.49418	1	2	wild	BranchStickTwig	0.738542	ID.25.1740	ID.25
1740	6.49418	1	3	wild	BranchStickTwig	0.738542	ID.25.1740	ID.25
1740	6.49418	1	1	wild	Bark	0.738542	ID.25.1740	ID.25
1742	6.49692	1	1	wild	Bark	0.739062	ID.25.1742	ID.25
1742	6.49692	1	2	wild	Treefork	0.739062	ID.25.1742	ID.25
1742	6.49692	1	3	wild	BranchStickTwig	0.739062	ID.25.1742	ID.25
1742	6.49692	1	2	wild	LeafDeadleaf	0.739062	ID.25.1742	ID.25
1742	6.49692	1	4	wild	LeafDeadleaf	0.739062	ID.25.1742	ID.25
1742	6.49692	1	4	wild	LeafDeadleaf	0.739062	ID.25.1742	ID.25
1742	6.49692	1	1	wild	BranchStickTwig	0.739062	ID.25.1742	ID.25
1742	6.49692	1	3	wild	Bark	0.739062	ID.25.1742	ID.25
1742	6.49692	1	3	wild	Bark	0.739062	ID.25.1742	ID.25
1742	6.49692	1	3	wild	BranchStickTwig	0.739062	ID.25.1742	ID.25
1742	6.49692	1	3	wild	Bark	0.739062	ID.25.1742	ID.25
1742	6.49692	1	2	wild	LeafDeadleaf	0.739062	ID.25.1742	ID.25
1745	2.24777	1	7	wild	BranchStickTwig	-0.570611	ID.21.1745	ID.21
1745	2.24777	1	2	wild	BranchStickTwig	-0.570611	ID.21.1745	ID.21
1745	2.24777	1	1	wild	LeafDeadleaf	-0.570611	ID.21.1745	ID.21
1745	2.24777	1	3	wild	BranchStickTwig	-0.570611	ID.21.1745	ID.21
1745	2.24777	1	2	wild	LeafDeadleaf	-0.570611	ID.21.1745	ID.21
1745	2.24777	1	4	wild	BranchStickTwig	-0.570611	ID.21.1745	ID.21
1745	2.24777	1	2	wild	BranchStickTwig	-0.570611	ID.21.1745	ID.21
1745	2.24777	1	4	wild	BranchStickTwig	-0.570611	ID.21.1745	ID.21
1745	2.24777	1	3	wild	LeafDeadleaf	-0.570611	ID.21.1745	ID.21
1745	2.24777	1	3	wild	LeafDeadleaf	-0.570611	ID.21.1745	ID.21
1745	2.24777	1	2	wild	BranchStickTwig	-0.570611	ID.21.1745	ID.21
1745	2.24777	1	3	wild	BranchStickTwig	-0.570611	ID.21.1745	ID.21
1745	2.24777	1	6	wild	LeafDeadleaf	-0.570611	ID.21.1745	ID.21
1745	2.24777	1	2	wild	BranchStickTwig	-0.570611	ID.21.1745	ID.21
1745	2.24777	1	3	wild	BranchStickTwig	-0.570611	ID.21.1745	ID.21
1745	2.24777	1	1	wild	BranchStickTwig	-0.570611	ID.21.1745	ID.21
1745	2.24777	1	2	wild	BranchStickTwig	-0.570611	ID.21.1745	ID.21
1745	2.24777	1	3	wild	BranchStickTwig	-0.570611	ID.21.1745	ID.21
1745	2.24777	1	2	wild	BranchStickTwig	-0.570611	ID.21.1745	ID.21
1745	2.24777	1	2	wild	Bark	-0.570611	ID.21.1745	ID.21
1745	2.24777	1	3	wild	BranchStickTwig	-0.570611	ID.21.1745	ID.21
1745	2.24777	1	2	wild	LeafDeadleaf	-0.570611	ID.21.1745	ID.21
1742	6.49692	1	2	wild	LeafDeadleaf	0.739062	ID.25.1742	ID.25
1742	6.49692	1	1	wild	Bark	0.739062	ID.25.1742	ID.25
1742	6.49692	1	2	wild	LeafDeadleaf	0.739062	ID.25.1742	ID.25
1747	6.49966	1	2	wild	BranchStickTwig	0.739582	ID.25.1747	ID.25
1747	6.49966	1	2	wild	dead leaf	0.739582	ID.25.1747	ID.25
1747	6.49966	1	5	wild	Bark	0.739582	ID.25.1747	ID.25
1747	6.49966	1	1	wild	LeafDeadleaf	0.739582	ID.25.1747	ID.25
1747	6.49966	1	5	wild	Treetrunk	0.739582	ID.25.1747	ID.25
1752	2.25325	1	3	wild	BranchStickTwig	-0.567608	ID.21.1752	ID.21
1752	2.25325	1	1	wild	LeafDeadleaf	-0.567608	ID.21.1752	ID.21
1752	2.25325	1	2	wild	BranchStickTwig	-0.567608	ID.21.1752	ID.21
1752	2.25325	1	3	wild	BranchStickTwig	-0.567608	ID.21.1752	ID.21
1752	2.25325	1	1	wild	LeafDeadleaf	-0.567608	ID.21.1752	ID.21
1752	2.25325	1	3	wild	BranchStickTwig	-0.567608	ID.21.1752	ID.21
1752	2.25325	1	2	wild	BranchStickTwig	-0.567608	ID.21.1752	ID.21
1752	2.25325	1	3	wild	BranchStickTwig	-0.567608	ID.21.1752	ID.21
1752	2.25325	1	2	wild	BranchStickTwig	-0.567608	ID.21.1752	ID.21
1752	2.25325	1	2	wild	BranchStickTwig	-0.567608	ID.21.1752	ID.21
1752	2.25325	1	1	wild	BranchStickTwig	-0.567608	ID.21.1752	ID.21
1752	2.25325	1	3	wild	BranchStickTwig	-0.567608	ID.21.1752	ID.21
1752	2.25325	1	2	wild	BranchStickTwig	-0.567608	ID.21.1752	ID.21
1752	2.25325	1	3	wild	BranchStickTwig	-0.567608	ID.21.1752	ID.21
1752	2.25325	1	4	wild	BranchStickTwig	-0.567608	ID.21.1752	ID.21
1752	2.25325	1	2	wild	BranchStickTwig	-0.567608	ID.21.1752	ID.21
1752	2.25325	1	3	wild	LeafDeadleaf	-0.567608	ID.21.1752	ID.21
1752	2.25325	1	3	wild	LeafDeadleaf	-0.567608	ID.21.1752	ID.21
1752	2.25325	1	2	wild	BranchStickTwig	-0.567608	ID.21.1752	ID.21
1752	2.25325	1	1	wild	LeafDeadleaf	-0.567608	ID.21.1752	ID.21
1747	6.49966	1	1	wild	BranchStickTwig	0.739582	ID.25.1747	ID.25
1747	6.49966	1	4	wild	Treetrunk	0.739582	ID.25.1747	ID.25
1754	6.50513	1	1	wild	BranchStickTwig	0.740621	ID.25.1754	ID.25
1754	6.50513	1	2	wild	Bark	0.740621	ID.25.1754	ID.25
1754	6.50513	1	1	wild	BranchStickTwig	0.740621	ID.25.1754	ID.25
1754	6.50513	1	2	wild	BranchStickTwig	0.740621	ID.25.1754	ID.25
1754	6.50513	1	2	wild	BranchStickTwig	0.740621	ID.25.1754	ID.25
1754	6.50513	1	2	wild	Bark	0.740621	ID.25.1754	ID.25
1754	6.50513	1	1	wild	BranchStickTwig	0.740621	ID.25.1754	ID.25
1754	6.50513	1	2	wild	BranchStickTwig	0.740621	ID.25.1754	ID.25
1754	6.50513	1	2	wild	LeafDeadleaf	0.740621	ID.25.1754	ID.25
1754	6.50513	1	2	wild	BranchStickTwig	0.740621	ID.25.1754	ID.25
1754	6.50513	1	1	wild	LeafDeadleaf	0.740621	ID.25.1754	ID.25
1754	6.50513	1	1	wild	BranchStickTwig	0.740621	ID.25.1754	ID.25
1754	6.50513	1	3	wild	dead leaf	0.740621	ID.25.1754	ID.25
1754	6.50513	1	1	wild	dead leaf	0.740621	ID.25.1754	ID.25
1754	6.50513	1	1	wild	BranchStickTwig	0.740621	ID.25.1754	ID.25
1756	6.50787	1	1	wild	BranchStickTwig	0.74114	ID.25.1756	ID.25
1756	6.50787	1	1	wild	Bark	0.74114	ID.25.1756	ID.25
1756	6.50787	1	1	wild	Bark	0.74114	ID.25.1756	ID.25
1756	6.50787	1	2	wild	BranchStickTwig	0.74114	ID.25.1756	ID.25
1756	6.50787	1	2	wild	BranchStickTwig	0.74114	ID.25.1756	ID.25
1756	6.50787	1	2	wild	BranchStickTwig	0.74114	ID.25.1756	ID.25
1756	6.50787	1	2	wild	BranchStickTwig	0.74114	ID.25.1756	ID.25
1756	6.50787	1	3	wild	BranchStickTwig	0.74114	ID.25.1756	ID.25
1756	6.50787	1	1	wild	BranchStickTwig	0.74114	ID.25.1756	ID.25
1756	6.50787	1	1	wild	BranchStickTwig	0.74114	ID.25.1756	ID.25
1756	6.50787	1	1	wild	BranchStickTwig	0.74114	ID.25.1756	ID.25
1756	6.50787	1	1	wild	Treetrunk	0.74114	ID.25.1756	ID.25
1756	6.50787	1	2	wild	LeafDeadleaf	0.74114	ID.25.1756	ID.25
1756	6.50787	1	2	wild	BranchStickTwig	0.74114	ID.25.1756	ID.25
1756	6.50787	1	3	wild	Bark	0.74114	ID.25.1756	ID.25
1756	6.50787	1	1	wild	BranchStickTwig	0.74114	ID.25.1756	ID.25
1756	6.50787	1	2	wild	LeafDeadleaf	0.74114	ID.25.1756	ID.25
1756	6.50787	1	2	wild	BranchStickTwig	0.74114	ID.25.1756	ID.25
1756	6.50787	1	2	wild	BranchStickTwig	0.74114	ID.25.1756	ID.25
1756	6.50787	1	2	wild	BranchStickTwig	0.74114	ID.25.1756	ID.25
1756	6.50787	1	1	wild	BranchStickTwig	0.74114	ID.25.1756	ID.25
1756	6.50787	1	1	wild	Treetrunk	0.74114	ID.25.1756	ID.25
1756	6.50787	1	4	wild	Bark	0.74114	ID.25.1756	ID.25
1756	6.50787	1	3	wild	BranchStickTwig	0.74114	ID.25.1756	ID.25
1756	6.50787	1	4	wild	Bark	0.74114	ID.25.1756	ID.25
1756	6.50787	1	1	wild	BranchStickTwig	0.74114	ID.25.1756	ID.25
1756	6.50787	1	2	wild	Treefork	0.74114	ID.25.1756	ID.25
1758	2.25599	1	2	wild	BranchStickTwig	-0.56611	ID.21.1758	ID.21
1758	2.25599	1	3	wild	BranchStickTwig	-0.56611	ID.21.1758	ID.21
1758	2.25599	1	1	wild	BranchStickTwig	-0.56611	ID.21.1758	ID.21
1758	2.25599	1	3	wild	Wood	-0.56611	ID.21.1758	ID.21
1758	2.25599	1	3	wild	LeafDeadleaf	-0.56611	ID.21.1758	ID.21
1758	2.25599	1	4	wild	BranchStickTwig	-0.56611	ID.21.1758	ID.21
1758	2.25599	1	2	wild	BranchStickTwig	-0.56611	ID.21.1758	ID.21
1758	2.25599	1	2	wild	BranchStickTwig	-0.56611	ID.21.1758	ID.21
1758	2.25599	1	2	wild	BranchStickTwig	-0.56611	ID.21.1758	ID.21
1758	2.25599	1	2	wild	LeafDeadleaf	-0.56611	ID.21.1758	ID.21
1758	2.25599	1	2	wild	LeafDeadleaf	-0.56611	ID.21.1758	ID.21
1758	2.25599	1	2	wild	BranchStickTwig	-0.56611	ID.21.1758	ID.21
1758	2.25599	1	3	wild	BranchStickTwig	-0.56611	ID.21.1758	ID.21
1758	2.25599	1	1	wild	BranchStickTwig	-0.56611	ID.21.1758	ID.21
1758	2.25599	1	2	wild	BranchStickTwig	-0.56611	ID.21.1758	ID.21
1758	2.25599	1	3	wild	BranchStickTwig	-0.56611	ID.21.1758	ID.21
1758	2.25599	1	1	wild	LeafDeadleaf	-0.56611	ID.21.1758	ID.21
1758	2.25599	1	4	wild	BranchStickTwig	-0.56611	ID.21.1758	ID.21
1758	2.25599	1	2	wild	BranchStickTwig	-0.56611	ID.21.1758	ID.21
1758	2.25599	1	3	wild	BranchStickTwig	-0.56611	ID.21.1758	ID.21
1758	2.25599	1	2	wild	BranchStickTwig	-0.56611	ID.21.1758	ID.21
1758	2.25599	1	4	wild	BranchStickTwig	-0.56611	ID.21.1758	ID.21
1758	2.25599	1	3	wild	BranchStickTwig	-0.56611	ID.21.1758	ID.21
1756	6.50787	1	2	wild	Treefork	0.74114	ID.25.1756	ID.25
1756	6.50787	1	3	wild	dead leaf	0.74114	ID.25.1756	ID.25
1756	6.50787	1	1	wild	Bark	0.74114	ID.25.1756	ID.25
1756	6.50787	1	1	wild	BranchStickTwig	0.74114	ID.25.1756	ID.25
1764	6.51335	1	1	wild	BranchStickTwig	0.742178	ID.25.1764	ID.25
1764	6.51335	1	2	wild	Treetrunk	0.742178	ID.25.1764	ID.25
1764	6.51335	1	2	wild	BranchStickTwig	0.742178	ID.25.1764	ID.25
1766	2.26146	1	2	wild	Bark	-0.563118	ID.21.1766	ID.21
1766	2.26146	1	1	wild	LeafDeadleaf	-0.563118	ID.21.1766	ID.21
1766	2.26146	1	2	wild	LeafDeadleaf	-0.563118	ID.21.1766	ID.21
1766	2.26146	1	3	wild	LeafDeadleaf	-0.563118	ID.21.1766	ID.21
1766	2.26146	1	2	wild	BranchStickTwig	-0.563118	ID.21.1766	ID.21
1766	2.26146	1	2	wild	BranchStickTwig	-0.563118	ID.21.1766	ID.21
1766	2.26146	1	1	wild	LeafDeadleaf	-0.563118	ID.21.1766	ID.21
1766	2.26146	1	1	wild	LeafDeadleaf	-0.563118	ID.21.1766	ID.21
1766	2.26146	1	2	wild	LeafDeadleaf	-0.563118	ID.21.1766	ID.21
1766	2.26146	1	3	wild	LeafDeadleaf	-0.563118	ID.21.1766	ID.21
1766	2.26146	1	1	wild	LeafDeadleaf	-0.563118	ID.21.1766	ID.21
1766	2.26146	1	3	wild	BranchStickTwig	-0.563118	ID.21.1766	ID.21
1766	2.26146	1	3	wild	BranchStickTwig	-0.563118	ID.21.1766	ID.21
1766	2.26146	1	3	wild	BranchStickTwig	-0.563118	ID.21.1766	ID.21
1766	2.26146	1	2	wild	BranchStickTwig	-0.563118	ID.21.1766	ID.21
1766	2.26146	1	3	wild	BranchStickTwig	-0.563118	ID.21.1766	ID.21
1766	2.26146	1	2	wild	BranchStickTwig	-0.563118	ID.21.1766	ID.21
1766	2.26146	1	4	wild	BranchStickTwig	-0.563118	ID.21.1766	ID.21
1766	2.26146	1	3	wild	BranchStickTwig	-0.563118	ID.21.1766	ID.21
1766	2.26146	1	1	wild	BranchStickTwig	-0.563118	ID.21.1766	ID.21
1766	2.26146	1	2	wild	Bark	-0.563118	ID.21.1766	ID.21
1766	2.26146	1	2	wild	BranchStickTwig	-0.563118	ID.21.1766	ID.21
1766	2.26146	1	4	wild	BranchStickTwig	-0.563118	ID.21.1766	ID.21
1766	2.26146	1	3	wild	BranchStickTwig	-0.563118	ID.21.1766	ID.21
1766	2.26146	1	3	wild	Treetrunk	-0.563118	ID.21.1766	ID.21
1766	2.26146	1	3	wild	LeafDeadleaf	-0.563118	ID.21.1766	ID.21
1766	2.26146	1	3	wild	BranchStickTwig	-0.563118	ID.21.1766	ID.21
1766	2.26146	1	1	wild	BranchStickTwig	-0.563118	ID.21.1766	ID.21
1766	2.26146	1	2	wild	BranchStickTwig	-0.563118	ID.21.1766	ID.21
1766	2.26146	1	3	wild	BranchStickTwig	-0.563118	ID.21.1766	ID.21
1766	2.26146	1	3	wild	BranchStickTwig	-0.563118	ID.21.1766	ID.21
1766	2.26146	1	1	wild	BranchStickTwig	-0.563118	ID.21.1766	ID.21
1766	2.26146	1	2	wild	BranchStickTwig	-0.563118	ID.21.1766	ID.21
1766	2.26146	1	1	wild	BranchStickTwig	-0.563118	ID.21.1766	ID.21
1766	2.26146	1	2	wild	BranchStickTwig	-0.563118	ID.21.1766	ID.21
1766	2.26146	1	2	wild	BranchStickTwig	-0.563118	ID.21.1766	ID.21
1766	2.26146	1	2	wild	BranchStickTwig	-0.563118	ID.21.1766	ID.21
1766	2.26146	1	1	wild	BranchStickTwig	-0.563118	ID.21.1766	ID.21
1770	2.2642	1	3	wild	BranchStickTwig	-0.561625	ID.21.1770	ID.21
1770	2.2642	1	1	wild	LeafDeadleaf	-0.561625	ID.21.1770	ID.21
1770	2.2642	1	1	wild	BranchStickTwig	-0.561625	ID.21.1770	ID.21
1770	2.2642	1	1	wild	Treetrunk	-0.561625	ID.21.1770	ID.21
1770	2.2642	1	3	wild	BranchStickTwig	-0.561625	ID.21.1770	ID.21
1770	2.2642	1	2	wild	BranchStickTwig	-0.561625	ID.21.1770	ID.21
1770	2.2642	1	3	wild	BranchStickTwig	-0.561625	ID.21.1770	ID.21
1770	2.2642	1	5	wild	BranchStickTwig	-0.561625	ID.21.1770	ID.21
1764	6.51335	1	3	wild	Bark	0.742178	ID.25.1764	ID.25
1772	6.51882	1	1	wild	Treetrunk	0.743215	ID.25.1772	ID.25
1772	6.51882	1	4	wild	BranchStickTwig	0.743215	ID.25.1772	ID.25
1772	6.51882	1	2	wild	Treetrunk	0.743215	ID.25.1772	ID.25
1772	6.51882	1	3	wild	BranchStickTwig	0.743215	ID.25.1772	ID.25
1772	6.51882	1	1	wild	Treetrunk	0.743215	ID.25.1772	ID.25
1772	6.51882	1	2	wild	BranchStickTwig	0.743215	ID.25.1772	ID.25
1772	6.51882	1	1	wild	BranchStickTwig	0.743215	ID.25.1772	ID.25
1772	6.51882	1	5	wild	BranchStickTwig	0.743215	ID.25.1772	ID.25
1772	6.51882	1	1	wild	BranchStickTwig	0.743215	ID.25.1772	ID.25
1772	6.51882	1	3	wild	BranchStickTwig	0.743215	ID.25.1772	ID.25
1772	6.51882	1	2	wild	Treetrunk	0.743215	ID.25.1772	ID.25
1772	6.51882	1	4	wild	BranchStickTwig	0.743215	ID.25.1772	ID.25
1772	6.51882	1	3	wild	BranchStickTwig	0.743215	ID.25.1772	ID.25
1772	6.51882	1	2	wild	Bark	0.743215	ID.25.1772	ID.25
1772	6.51882	1	1	wild	BranchStickTwig	0.743215	ID.25.1772	ID.25
1772	6.51882	1	2	wild	Bark	0.743215	ID.25.1772	ID.25
1772	6.51882	1	2	wild	BranchStickTwig	0.743215	ID.25.1772	ID.25
1772	6.51882	1	2	wild	BranchStickTwig	0.743215	ID.25.1772	ID.25
1772	6.51882	1	2	wild	BranchStickTwig	0.743215	ID.25.1772	ID.25
1772	6.51882	1	2	wild	Bark	0.743215	ID.25.1772	ID.25
1772	6.51882	1	1	wild	BranchStickTwig	0.743215	ID.25.1772	ID.25
1772	6.51882	1	1	wild	Bark	0.743215	ID.25.1772	ID.25
1772	6.51882	1	2	wild	BranchStickTwig	0.743215	ID.25.1772	ID.25
1773	2.26694	1	2	wild	BranchStickTwig	-0.560135	ID.21.1773	ID.21
1773	2.26694	1	1	wild	LeafDeadleaf	-0.560135	ID.21.1773	ID.21
1773	2.26694	1	1	wild	Bark	-0.560135	ID.21.1773	ID.21
1773	2.26694	1	2	wild	Bark	-0.560135	ID.21.1773	ID.21
1773	2.26694	1	1	wild	LeafDeadleaf	-0.560135	ID.21.1773	ID.21
1773	2.26694	1	3	wild	LeafDeadleaf	-0.560135	ID.21.1773	ID.21
1773	2.26694	1	3	wild	LeafDeadleaf	-0.560135	ID.21.1773	ID.21
1773	2.26694	1	2	wild	LeafDeadleaf	-0.560135	ID.21.1773	ID.21
1773	2.26694	1	3	wild	BranchStickTwig	-0.560135	ID.21.1773	ID.21
1773	2.26694	1	1	wild	BranchStickTwig	-0.560135	ID.21.1773	ID.21
1773	2.26694	1	2	wild	BranchStickTwig	-0.560135	ID.21.1773	ID.21
1773	2.26694	1	2	wild	Bark	-0.560135	ID.21.1773	ID.21
1773	2.26694	1	2	wild	Bark	-0.560135	ID.21.1773	ID.21
1773	2.26694	1	1	wild	Bark	-0.560135	ID.21.1773	ID.21
1773	2.26694	1	2	wild	BranchStickTwig	-0.560135	ID.21.1773	ID.21
1773	2.26694	1	3	wild	BranchStickTwig	-0.560135	ID.21.1773	ID.21
1773	2.26694	1	1	wild	BranchStickTwig	-0.560135	ID.21.1773	ID.21
1773	2.26694	1	1	wild	LeafDeadleaf	-0.560135	ID.21.1773	ID.21
1774	2.26968	1	2	wild	LeafDeadleaf	-0.558645	ID.21.1774	ID.21
1774	2.26968	1	1	wild	BranchStickTwig	-0.558645	ID.21.1774	ID.21
1774	2.26968	1	2	wild	LeafDeadleaf	-0.558645	ID.21.1774	ID.21
1774	2.26968	1	2	wild	LeafDeadleaf	-0.558645	ID.21.1774	ID.21
1774	2.26968	1	2	wild	BranchStickTwig	-0.558645	ID.21.1774	ID.21
1774	2.26968	1	2	wild	BranchStickTwig	-0.558645	ID.21.1774	ID.21
1774	2.26968	1	1	wild	LeafDeadleaf	-0.558645	ID.21.1774	ID.21
1774	2.26968	1	2	wild	LeafDeadleaf	-0.558645	ID.21.1774	ID.21
1774	2.26968	1	2	wild	LeafDeadleaf	-0.558645	ID.21.1774	ID.21
1774	2.26968	1	3	wild	Bark	-0.558645	ID.21.1774	ID.21
1774	2.26968	1	3	wild	LeafDeadleaf	-0.558645	ID.21.1774	ID.21
1774	2.26968	1	1	wild	LeafDeadleaf	-0.558645	ID.21.1774	ID.21
1774	2.26968	1	1	wild	BranchStickTwig	-0.558645	ID.21.1774	ID.21
1774	2.26968	1	1	wild	Bark	-0.558645	ID.21.1774	ID.21
1774	2.26968	1	1	wild	BranchStickTwig	-0.558645	ID.21.1774	ID.21
1774	2.26968	1	2	wild	LeafDeadleaf	-0.558645	ID.21.1774	ID.21
1774	2.26968	1	4	wild	LeafDeadleaf	-0.558645	ID.21.1774	ID.21
1774	2.26968	1	2	wild	Bark	-0.558645	ID.21.1774	ID.21
1774	2.26968	1	3	wild	Bark	-0.558645	ID.21.1774	ID.21
1774	2.26968	1	2	wild	LeafDeadleaf	-0.558645	ID.21.1774	ID.21
1774	2.26968	1	1	wild	BranchStickTwig	-0.558645	ID.21.1774	ID.21
1774	2.26968	1	1	wild	BranchStickTwig	-0.558645	ID.21.1774	ID.21
1774	2.26968	1	1	wild	Bark	-0.558645	ID.21.1774	ID.21
1774	2.26968	1	1	wild	dead leaf	-0.558645	ID.21.1774	ID.21
1774	2.26968	1	3	wild	BranchStickTwig	-0.558645	ID.21.1774	ID.21
1774	2.26968	1	3	wild	BranchStickTwig	-0.558645	ID.21.1774	ID.21
1774	2.26968	1	1	wild	Bark	-0.558645	ID.21.1774	ID.21
1774	2.26968	1	1	wild	BranchStickTwig	-0.558645	ID.21.1774	ID.21
1774	2.26968	1	1	wild	BranchStickTwig	-0.558645	ID.21.1774	ID.21
1774	2.26968	1	2	wild	BranchStickTwig	-0.558645	ID.21.1774	ID.21
1774	2.26968	1	2	wild	BranchStickTwig	-0.558645	ID.21.1774	ID.21
1772	6.51882	1	2	wild	BranchStickTwig	0.743215	ID.25.1772	ID.25
1772	6.51882	1	2	wild	Treetrunk	0.743215	ID.25.1772	ID.25
1772	6.51882	1	3	wild	BranchStickTwig	0.743215	ID.25.1772	ID.25
1772	6.51882	1	2	wild	BranchStickTwig	0.743215	ID.25.1772	ID.25
1772	6.51882	1	3	wild	BranchStickTwig	0.743215	ID.25.1772	ID.25
1778	6.5243	1	3	wild	BranchStickTwig	0.744251	ID.25.1778	ID.25
1778	6.5243	1	1	wild	Treetrunk	0.744251	ID.25.1778	ID.25
1778	6.5243	1	3	wild	BranchStickTwig	0.744251	ID.25.1778	ID.25
1778	6.5243	1	1	wild	Bark	0.744251	ID.25.1778	ID.25
1778	6.5243	1	1	wild	BranchStickTwig	0.744251	ID.25.1778	ID.25
1778	6.5243	1	2	wild	BranchStickTwig	0.744251	ID.25.1778	ID.25
1778	6.5243	1	4	wild	BranchStickTwig	0.744251	ID.25.1778	ID.25
1778	6.5243	1	3	wild	BranchStickTwig	0.744251	ID.25.1778	ID.25
1778	6.5243	1	2	wild	BranchStickTwig	0.744251	ID.25.1778	ID.25
1778	6.5243	1	2	wild	BranchStickTwig	0.744251	ID.25.1778	ID.25
1778	6.5243	1	2	wild	BranchStickTwig	0.744251	ID.25.1778	ID.25
1778	6.5243	1	2	wild	BranchStickTwig	0.744251	ID.25.1778	ID.25
1778	6.5243	1	2	wild	BranchStickTwig	0.744251	ID.25.1778	ID.25
1778	6.5243	1	2	wild	BranchStickTwig	0.744251	ID.25.1778	ID.25
1778	6.5243	1	2	wild	Bark	0.744251	ID.25.1778	ID.25
1778	6.5243	1	2	wild	BranchStickTwig	0.744251	ID.25.1778	ID.25
1778	6.5243	1	2	wild	BranchStickTwig	0.744251	ID.25.1778	ID.25
1778	6.5243	1	1	wild	Wood	0.744251	ID.25.1778	ID.25
1778	6.5243	1	2	wild	BranchStickTwig	0.744251	ID.25.1778	ID.25
1778	6.5243	1	1	wild	BranchStickTwig	0.744251	ID.25.1778	ID.25
1779	2.27242	1	1	wild	LeafDeadleaf	-0.557158	ID.21.1779	ID.21
1779	2.27242	1	2	wild	BranchStickTwig	-0.557158	ID.21.1779	ID.21
1779	2.27242	1	2	wild	BranchStickTwig	-0.557158	ID.21.1779	ID.21
1779	2.27242	1	3	wild	BranchStickTwig	-0.557158	ID.21.1779	ID.21
1779	2.27242	1	3	wild	BranchStickTwig	-0.557158	ID.21.1779	ID.21
1779	2.27242	1	2	wild	BranchStickTwig	-0.557158	ID.21.1779	ID.21
1779	2.27242	1	1	wild	LeafDeadleaf	-0.557158	ID.21.1779	ID.21
1779	2.27242	1	2	wild	BranchStickTwig	-0.557158	ID.21.1779	ID.21
1779	2.27242	1	2	wild	BranchStickTwig	-0.557158	ID.21.1779	ID.21
1779	2.27242	1	2	wild	BranchStickTwig	-0.557158	ID.21.1779	ID.21
1779	2.27242	1	1	wild	LeafDeadleaf	-0.557158	ID.21.1779	ID.21
1779	2.27242	1	1	wild	LeafDeadleaf	-0.557158	ID.21.1779	ID.21
1779	2.27242	1	2	wild	Treefork	-0.557158	ID.21.1779	ID.21
1779	2.27242	1	1	wild	LeafDeadleaf	-0.557158	ID.21.1779	ID.21
1779	2.27242	1	2	wild	BranchStickTwig	-0.557158	ID.21.1779	ID.21
1779	2.27242	1	1	wild	BranchStickTwig	-0.557158	ID.21.1779	ID.21
1778	6.5243	1	2	wild	BranchStickTwig	0.744251	ID.25.1778	ID.25
1778	6.5243	1	3	wild	BranchStickTwig	0.744251	ID.25.1778	ID.25
1778	6.5243	1	3	wild	BranchStickTwig	0.744251	ID.25.1778	ID.25
1778	6.5243	1	2	wild	Bark	0.744251	ID.25.1778	ID.25
1778	6.5243	1	2	wild	BranchStickTwig	0.744251	ID.25.1778	ID.25
1782	6.52704	1	2	wild	BranchStickTwig	0.744769	ID.25.1782	ID.25
1782	6.52704	1	3	wild	BranchStickTwig	0.744769	ID.25.1782	ID.25
1782	6.52704	1	2	wild	Treetrunk	0.744769	ID.25.1782	ID.25
1782	6.52704	1	1	wild	BranchStickTwig	0.744769	ID.25.1782	ID.25
1782	6.52704	1	3	wild	BranchStickTwig	0.744769	ID.25.1782	ID.25
1782	6.52704	1	1	wild	BranchStickTwig	0.744769	ID.25.1782	ID.25
1782	6.52704	1	1	wild	BranchStickTwig	0.744769	ID.25.1782	ID.25
1782	6.52704	1	3	wild	BranchStickTwig	0.744769	ID.25.1782	ID.25
1782	6.52704	1	3	wild	BranchStickTwig	0.744769	ID.25.1782	ID.25
1782	6.52704	1	2	wild	BranchStickTwig	0.744769	ID.25.1782	ID.25
1782	6.52704	1	3	wild	BranchStickTwig	0.744769	ID.25.1782	ID.25
1782	6.52704	1	2	wild	BranchStickTwig	0.744769	ID.25.1782	ID.25
1782	6.52704	1	3	wild	BranchStickTwig	0.744769	ID.25.1782	ID.25
1782	6.52704	1	3	wild	BranchStickTwig	0.744769	ID.25.1782	ID.25
1782	6.52704	1	1	wild	BranchStickTwig	0.744769	ID.25.1782	ID.25
1782	6.52704	1	2	wild	BranchStickTwig	0.744769	ID.25.1782	ID.25
1782	6.52704	1	2	wild	BranchStickTwig	0.744769	ID.25.1782	ID.25
1782	6.52704	1	2	wild	BranchStickTwig	0.744769	ID.25.1782	ID.25
1782	6.52704	1	2	wild	BranchStickTwig	0.744769	ID.25.1782	ID.25
1782	6.52704	1	2	wild	Bark	0.744769	ID.25.1782	ID.25
1782	6.52704	1	1	wild	Bark	0.744769	ID.25.1782	ID.25
1782	6.52704	1	3	wild	BranchStickTwig	0.744769	ID.25.1782	ID.25
1782	6.52704	1	1	wild	Bark	0.744769	ID.25.1782	ID.25
1782	6.52704	1	2	wild	BranchStickTwig	0.744769	ID.25.1782	ID.25
1782	6.52704	1	1	wild	BranchStickTwig	0.744769	ID.25.1782	ID.25
1782	6.52704	1	2	wild	BranchStickTwig	0.744769	ID.25.1782	ID.25
1782	6.52704	1	2	wild	BranchStickTwig	0.744769	ID.25.1782	ID.25
1782	6.52704	1	2	wild	BranchStickTwig	0.744769	ID.25.1782	ID.25
1782	6.52704	1	3	wild	Treetrunk	0.744769	ID.25.1782	ID.25
1782	6.52704	1	2	wild	BranchStickTwig	0.744769	ID.25.1782	ID.25
1782	6.52704	1	3	wild	BranchStickTwig	0.744769	ID.25.1782	ID.25
1782	6.52704	1	2	wild	BranchStickTwig	0.744769	ID.25.1782	ID.25
1782	6.52704	1	2	wild	BranchStickTwig	0.744769	ID.25.1782	ID.25
1782	6.52704	1	3	wild	Treetrunk	0.744769	ID.25.1782	ID.25
1782	6.52704	1	1	wild	BranchStickTwig	0.744769	ID.25.1782	ID.25
1782	6.52704	1	2	wild	BranchStickTwig	0.744769	ID.25.1782	ID.25
1782	6.52704	1	2	wild	Treetrunk	0.744769	ID.25.1782	ID.25
1782	6.52704	1	2	wild	BranchStickTwig	0.744769	ID.25.1782	ID.25
1782	6.52704	1	2	wild	BranchStickTwig	0.744769	ID.25.1782	ID.25
1782	6.52704	1	3	wild	BranchStickTwig	0.744769	ID.25.1782	ID.25
1782	6.52704	1	2	wild	LeafDeadleaf	0.744769	ID.25.1782	ID.25
1782	6.52704	1	3	wild	BranchStickTwig	0.744769	ID.25.1782	ID.25
1782	6.52704	1	3	wild	BranchStickTwig	0.744769	ID.25.1782	ID.25
1786	6.52977	1	3	wild	BranchStickTwig	0.745286	ID.25.1786	ID.25
1786	6.52977	1	3	wild	BranchStickTwig	0.745286	ID.25.1786	ID.25
1786	6.52977	1	2	wild	BranchStickTwig	0.745286	ID.25.1786	ID.25
1786	6.52977	1	2	wild	BranchStickTwig	0.745286	ID.25.1786	ID.25
1786	6.52977	1	1	wild	Treetrunk	0.745286	ID.25.1786	ID.25
1786	6.52977	1	2	wild	BranchStickTwig	0.745286	ID.25.1786	ID.25
1786	6.52977	1	2	wild	BranchStickTwig	0.745286	ID.25.1786	ID.25
1786	6.52977	1	3	wild	BranchStickTwig	0.745286	ID.25.1786	ID.25
1786	6.52977	1	2	wild	BranchStickTwig	0.745286	ID.25.1786	ID.25
1786	6.52977	1	4	wild	LeafDeadleaf	0.745286	ID.25.1786	ID.25
1786	6.52977	1	2	wild	BranchStickTwig	0.745286	ID.25.1786	ID.25
1786	6.52977	1	3	wild	LeafDeadleaf	0.745286	ID.25.1786	ID.25
1786	6.52977	1	2	wild	BranchStickTwig	0.745286	ID.25.1786	ID.25
1786	6.52977	1	2	wild	BranchStickTwig	0.745286	ID.25.1786	ID.25
1786	6.52977	1	3	wild	BranchStickTwig	0.745286	ID.25.1786	ID.25
1789	2.27789	1	2	wild	LeafDeadleaf	-0.554188	ID.21.1789	ID.21
1789	2.27789	1	4	wild	LeafDeadleaf	-0.554188	ID.21.1789	ID.21
1789	2.27789	1	1	wild	BranchStickTwig	-0.554188	ID.21.1789	ID.21
1789	2.27789	1	2	wild	BranchStickTwig	-0.554188	ID.21.1789	ID.21
1789	2.27789	1	2	wild	Bark	-0.554188	ID.21.1789	ID.21
1789	2.27789	1	1	wild	LeafDeadleaf	-0.554188	ID.21.1789	ID.21
1789	2.27789	1	2	wild	BranchStickTwig	-0.554188	ID.21.1789	ID.21
1791	4.86242	1	4	wild	Bark	0.381481	ID.10.1791	ID.10
1791	4.86242	1	1	wild	Bark	0.381481	ID.10.1791	ID.10
1791	4.86242	1	2	wild	BranchStickTwig	0.381481	ID.10.1791	ID.10
1791	4.86242	1	1	wild	BranchStickTwig	0.381481	ID.10.1791	ID.10
1791	4.86242	1	1	wild	BranchStickTwig	0.381481	ID.10.1791	ID.10
1791	4.86242	1	2	wild	LeafDeadleaf	0.381481	ID.10.1791	ID.10
1791	4.86242	1	2	wild	Treetrunk	0.381481	ID.10.1791	ID.10
1795	4.86516	1	2	wild	BranchStickTwig	0.382176	ID.10.1795	ID.10
1795	4.86516	1	2	wild	BranchStickTwig	0.382176	ID.10.1795	ID.10
1795	4.86516	1	2	wild	BranchStickTwig	0.382176	ID.10.1795	ID.10
1795	4.86516	1	2	wild	BranchStickTwig	0.382176	ID.10.1795	ID.10
1795	4.86516	1	2	wild	Bark	0.382176	ID.10.1795	ID.10
1795	4.86516	1	1	wild	BranchStickTwig	0.382176	ID.10.1795	ID.10
1795	4.86516	1	2	wild	BranchStickTwig	0.382176	ID.10.1795	ID.10
1795	4.86516	1	2	wild	BranchStickTwig	0.382176	ID.10.1795	ID.10
1795	4.86516	1	2	wild	BranchStickTwig	0.382176	ID.10.1795	ID.10
1795	4.86516	1	3	wild	Bark	0.382176	ID.10.1795	ID.10
1795	4.86516	1	1	wild	Birdnest	0.382176	ID.10.1795	ID.10
1795	4.86516	1	2	wild	BranchStickTwig	0.382176	ID.10.1795	ID.10
1795	4.86516	1	1	wild	LeafDeadleaf	0.382176	ID.10.1795	ID.10
1795	4.86516	1	3	wild	LeafDeadleaf	0.382176	ID.10.1795	ID.10
1795	4.86516	1	2	wild	LeafDeadleaf	0.382176	ID.10.1795	ID.10
1795	4.86516	1	2	wild	BranchStickTwig	0.382176	ID.10.1795	ID.10
1795	4.86516	1	2	wild	BranchStickTwig	0.382176	ID.10.1795	ID.10
1795	4.86516	1	2	wild	BranchStickTwig	0.382176	ID.10.1795	ID.10
1798	4.8679	1	3	wild	Bark	0.38287	ID.10.1798	ID.10
1798	4.8679	1	3	wild	BranchStickTwig	0.38287	ID.10.1798	ID.10
1798	4.8679	1	4	wild	BranchStickTwig	0.38287	ID.10.1798	ID.10
1798	4.8679	1	3	wild	Bark	0.38287	ID.10.1798	ID.10
1798	4.8679	1	2	wild	BranchStickTwig	0.38287	ID.10.1798	ID.10
1798	4.8679	1	2	wild	BranchStickTwig	0.38287	ID.10.1798	ID.10
1798	4.8679	1	2	wild	BranchStickTwig	0.38287	ID.10.1798	ID.10
1798	4.8679	1	2	wild	BranchStickTwig	0.38287	ID.10.1798	ID.10
1798	4.8679	1	3	wild	Bark	0.38287	ID.10.1798	ID.10
1798	4.8679	1	2	wild	BranchStickTwig	0.38287	ID.10.1798	ID.10
1798	4.8679	1	4	wild	Treetrunk	0.38287	ID.10.1798	ID.10
1798	4.8679	1	1	wild	dead leaf	0.38287	ID.10.1798	ID.10
1798	4.8679	1	2	wild	BranchStickTwig	0.38287	ID.10.1798	ID.10
1798	4.8679	1	2	wild	Bark	0.38287	ID.10.1798	ID.10
1786	6.52977	1	1	wild	BranchStickTwig	0.745286	ID.25.1786	ID.25
1786	6.52977	1	3	wild	BranchStickTwig	0.745286	ID.25.1786	ID.25
1786	6.52977	1	3	wild	BranchStickTwig	0.745286	ID.25.1786	ID.25
1786	6.52977	1	1	wild	BranchStickTwig	0.745286	ID.25.1786	ID.25
1800	6.53525	1	2	wild	BranchStickTwig	0.746321	ID.25.1800	ID.25
1800	6.53525	1	2	wild	BranchStickTwig	0.746321	ID.25.1800	ID.25
1800	6.53525	1	1	wild	Bark	0.746321	ID.25.1800	ID.25
1800	6.53525	1	2	wild	BranchStickTwig	0.746321	ID.25.1800	ID.25
1800	6.53525	1	2	wild	LeafDeadleaf	0.746321	ID.25.1800	ID.25
1800	6.53525	1	3	wild	BranchStickTwig	0.746321	ID.25.1800	ID.25
1800	6.53525	1	2	wild	BranchStickTwig	0.746321	ID.25.1800	ID.25
1800	6.53525	1	2	wild	BranchStickTwig	0.746321	ID.25.1800	ID.25
1800	6.53525	1	2	wild	BranchStickTwig	0.746321	ID.25.1800	ID.25
1800	6.53525	1	3	wild	BranchStickTwig	0.746321	ID.25.1800	ID.25
1800	6.53525	1	4	wild	BranchStickTwig	0.746321	ID.25.1800	ID.25
1800	6.53525	1	2	wild	BranchStickTwig	0.746321	ID.25.1800	ID.25
1800	6.53525	1	2	wild	BranchStickTwig	0.746321	ID.25.1800	ID.25
1800	6.53525	1	1	wild	Treetrunk	0.746321	ID.25.1800	ID.25
1800	6.53525	1	2	wild	BranchStickTwig	0.746321	ID.25.1800	ID.25
1800	6.53525	1	2	wild	Bark	0.746321	ID.25.1800	ID.25
1800	6.53525	1	2	wild	BranchStickTwig	0.746321	ID.25.1800	ID.25
1800	6.53525	1	5	wild	LeafDeadleaf	0.746321	ID.25.1800	ID.25
1800	6.53525	1	2	wild	BranchStickTwig	0.746321	ID.25.1800	ID.25
1800	6.53525	1	2	wild	BranchStickTwig	0.746321	ID.25.1800	ID.25
1800	6.53525	1	3	wild	BranchStickTwig	0.746321	ID.25.1800	ID.25
1800	6.53525	1	1	wild	BranchStickTwig	0.746321	ID.25.1800	ID.25
1800	6.53525	1	1	wild	BranchStickTwig	0.746321	ID.25.1800	ID.25
1800	6.53525	1	2	wild	BranchStickTwig	0.746321	ID.25.1800	ID.25
1800	6.53525	1	1	wild	BranchStickTwig	0.746321	ID.25.1800	ID.25
1800	6.53525	1	3	wild	BranchStickTwig	0.746321	ID.25.1800	ID.25
1800	6.53525	1	3	wild	BranchStickTwig	0.746321	ID.25.1800	ID.25
1800	6.53525	1	1	wild	Treetrunk	0.746321	ID.25.1800	ID.25
1879	5.00205	1	1	wild	Treetrunk	0.416416	ID.10.1879	ID.10
1890	2.26694	1	1	wild	Bark	-0.560135	ID.8.1890	ID.8
1804	4.87064	1	3	wild	BranchStickTwig	0.383564	ID.10.1804	ID.10
1804	4.87064	1	2	wild	BranchStickTwig	0.383564	ID.10.1804	ID.10
1804	4.87064	1	2	wild	BranchStickTwig	0.383564	ID.10.1804	ID.10
1804	4.87064	1	3	wild	BranchStickTwig	0.383564	ID.10.1804	ID.10
1804	4.87064	1	2	wild	BranchStickTwig	0.383564	ID.10.1804	ID.10
1804	4.87064	1	3	wild	BranchStickTwig	0.383564	ID.10.1804	ID.10
1804	4.87064	1	3	wild	BranchStickTwig	0.383564	ID.10.1804	ID.10
1804	4.87064	1	2	wild	BranchStickTwig	0.383564	ID.10.1804	ID.10
1804	4.87064	1	2	wild	BranchStickTwig	0.383564	ID.10.1804	ID.10
1804	4.87064	1	2	wild	Treetrunk	0.383564	ID.10.1804	ID.10
1804	4.87064	1	2	wild	BranchStickTwig	0.383564	ID.10.1804	ID.10
1804	4.87064	1	1	wild	Treetrunk	0.383564	ID.10.1804	ID.10
1804	4.87064	1	2	wild	Treetrunk	0.383564	ID.10.1804	ID.10
1804	4.87064	1	2	wild	BranchStickTwig	0.383564	ID.10.1804	ID.10
1804	4.87064	1	2	wild	BranchStickTwig	0.383564	ID.10.1804	ID.10
1804	4.87064	1	2	wild	BranchStickTwig	0.383564	ID.10.1804	ID.10
1804	4.87064	1	3	wild	BranchStickTwig	0.383564	ID.10.1804	ID.10
1804	4.87064	1	2	wild	BranchStickTwig	0.383564	ID.10.1804	ID.10
1804	4.87064	1	3	wild	BranchStickTwig	0.383564	ID.10.1804	ID.10
1804	4.87064	1	3	wild	BranchStickTwig	0.383564	ID.10.1804	ID.10
1804	4.87064	1	3	wild	BranchStickTwig	0.383564	ID.10.1804	ID.10
1804	4.87064	1	1	wild	BranchStickTwig	0.383564	ID.10.1804	ID.10
1804	4.87064	1	2	wild	BranchStickTwig	0.383564	ID.10.1804	ID.10
1804	4.87064	1	1	wild	Treetrunk	0.383564	ID.10.1804	ID.10
1804	4.87064	1	2	wild	Treetrunk	0.383564	ID.10.1804	ID.10
1804	4.87064	1	2	wild	BranchStickTwig	0.383564	ID.10.1804	ID.10
1804	4.87064	1	2	wild	Treetrunk	0.383564	ID.10.1804	ID.10
1806	4.87337	1	1	wild	BranchStickTwig	0.384257	ID.10.1806	ID.10
1806	4.87337	1	1	wild	BranchStickTwig	0.384257	ID.10.1806	ID.10
1806	4.87337	1	1	wild	BranchStickTwig	0.384257	ID.10.1806	ID.10
1806	4.87337	1	1	wild	dead leaf	0.384257	ID.10.1806	ID.10
1806	4.87337	1	2	wild	Bark	0.384257	ID.10.1806	ID.10
1806	4.87337	1	1	wild	BranchStickTwig	0.384257	ID.10.1806	ID.10
1806	4.87337	1	2	wild	BranchStickTwig	0.384257	ID.10.1806	ID.10
1806	4.87337	1	1	wild	BranchStickTwig	0.384257	ID.10.1806	ID.10
1806	4.87337	1	2	wild	LeafDeadleaf	0.384257	ID.10.1806	ID.10
1806	4.87337	1	3	wild	BranchStickTwig	0.384257	ID.10.1806	ID.10
1806	4.87337	1	1	wild	dead leaf	0.384257	ID.10.1806	ID.10
1806	4.87337	1	1	wild	dead leaf	0.384257	ID.10.1806	ID.10
1806	4.87337	1	1	wild	BranchStickTwig	0.384257	ID.10.1806	ID.10
1806	4.87337	1	3	wild	Bark	0.384257	ID.10.1806	ID.10
1806	4.87337	1	1	wild	BranchStickTwig	0.384257	ID.10.1806	ID.10
1806	4.87337	1	1	wild	dead leaf	0.384257	ID.10.1806	ID.10
1806	4.87337	1	2	wild	BranchStickTwig	0.384257	ID.10.1806	ID.10
1809	4.87611	1	2	wild	BranchStickTwig	0.38495	ID.10.1809	ID.10
1809	4.87611	1	2	wild	BranchStickTwig	0.38495	ID.10.1809	ID.10
1809	4.87611	1	2	wild	BranchStickTwig	0.38495	ID.10.1809	ID.10
1809	4.87611	1	1	wild	Treetrunk	0.38495	ID.10.1809	ID.10
1809	4.87611	1	2	wild	BranchStickTwig	0.38495	ID.10.1809	ID.10
1809	4.87611	1	3	wild	BranchStickTwig	0.38495	ID.10.1809	ID.10
1809	4.87611	1	3	wild	BranchStickTwig	0.38495	ID.10.1809	ID.10
1809	4.87611	1	2	wild	BranchStickTwig	0.38495	ID.10.1809	ID.10
1809	4.87611	1	2	wild	BranchStickTwig	0.38495	ID.10.1809	ID.10
1809	4.87611	1	1	wild	BranchStickTwig	0.38495	ID.10.1809	ID.10
1809	4.87611	1	2	wild	BranchStickTwig	0.38495	ID.10.1809	ID.10
1809	4.87611	1	2	wild	Treetrunk	0.38495	ID.10.1809	ID.10
1809	4.87611	1	3	wild	Treetrunk	0.38495	ID.10.1809	ID.10
1809	4.87611	1	2	wild	BranchStickTwig	0.38495	ID.10.1809	ID.10
1809	4.87611	1	2	wild	BranchStickTwig	0.38495	ID.10.1809	ID.10
1809	4.87611	1	3	wild	BranchStickTwig	0.38495	ID.10.1809	ID.10
1809	4.87611	1	2	wild	BranchStickTwig	0.38495	ID.10.1809	ID.10
1809	4.87611	1	2	wild	BranchStickTwig	0.38495	ID.10.1809	ID.10
1809	4.87611	1	2	wild	BranchStickTwig	0.38495	ID.10.1809	ID.10
1809	4.87611	1	2	wild	BranchStickTwig	0.38495	ID.10.1809	ID.10
1809	4.87611	1	1	wild	LeafDeadleaf	0.38495	ID.10.1809	ID.10
1809	4.87611	1	3	wild	BranchStickTwig	0.38495	ID.10.1809	ID.10
1809	4.87611	1	1	wild	BranchStickTwig	0.38495	ID.10.1809	ID.10
1809	4.87611	1	1	wild	LeafDeadleaf	0.38495	ID.10.1809	ID.10
1809	4.87611	1	1	wild	Treetrunk	0.38495	ID.10.1809	ID.10
1809	4.87611	1	1	wild	LeafDeadleaf	0.38495	ID.10.1809	ID.10
1809	4.87611	1	3	wild	BranchStickTwig	0.38495	ID.10.1809	ID.10
1811	2.29158	1	1	wild	LeafDeadleaf	-0.546795	ID.21.1811	ID.21
1811	2.29158	1	1	wild	dead leaf	-0.546795	ID.21.1811	ID.21
1811	2.29158	1	2	wild	Bark	-0.546795	ID.21.1811	ID.21
1811	2.29158	1	2	wild	BranchStickTwig	-0.546795	ID.21.1811	ID.21
1811	2.29158	1	1	wild	LeafDeadleaf	-0.546795	ID.21.1811	ID.21
1811	2.29158	1	2	wild	dead leaf	-0.546795	ID.21.1811	ID.21
1811	2.29158	1	1	wild	LeafDeadleaf	-0.546795	ID.21.1811	ID.21
1811	2.29158	1	4	wild	BranchStickTwig	-0.546795	ID.21.1811	ID.21
1811	2.29158	1	3	wild	Treefork	-0.546795	ID.21.1811	ID.21
1811	2.29158	1	1	wild	BranchStickTwig	-0.546795	ID.21.1811	ID.21
1811	2.29158	1	2	wild	LeafDeadleaf	-0.546795	ID.21.1811	ID.21
1811	2.29158	1	2	wild	LeafDeadleaf	-0.546795	ID.21.1811	ID.21
1811	2.29158	1	2	wild	BranchStickTwig	-0.546795	ID.21.1811	ID.21
1811	2.29158	1	1	wild	BranchStickTwig	-0.546795	ID.21.1811	ID.21
1811	2.29158	1	1	wild	LeafDeadleaf	-0.546795	ID.21.1811	ID.21
1811	2.29158	1	2	wild	BranchStickTwig	-0.546795	ID.21.1811	ID.21
1811	2.29158	1	2	wild	dead leaf	-0.546795	ID.21.1811	ID.21
1811	2.29158	1	2	wild	BranchStickTwig	-0.546795	ID.21.1811	ID.21
1811	2.29158	1	2	wild	Bark	-0.546795	ID.21.1811	ID.21
1811	2.29158	1	1	wild	BranchStickTwig	-0.546795	ID.21.1811	ID.21
1811	2.29158	1	1	wild	LeafDeadleaf	-0.546795	ID.21.1811	ID.21
1811	2.29158	1	2	wild	BranchStickTwig	-0.546795	ID.21.1811	ID.21
1811	2.29158	1	1	wild	BranchStickTwig	-0.546795	ID.21.1811	ID.21
1811	2.29158	1	7	wild	BranchStickTwig	-0.546795	ID.21.1811	ID.21
1811	2.29158	1	3	wild	LeafDeadleaf	-0.546795	ID.21.1811	ID.21
1811	2.29158	1	1	wild	LeafDeadleaf	-0.546795	ID.21.1811	ID.21
1811	2.29158	1	1	wild	BranchStickTwig	-0.546795	ID.21.1811	ID.21
1811	2.29158	1	1	wild	BranchStickTwig	-0.546795	ID.21.1811	ID.21
1811	2.29158	1	2	wild	BranchStickTwig	-0.546795	ID.21.1811	ID.21
1811	2.29158	1	2	wild	LeafDeadleaf	-0.546795	ID.21.1811	ID.21
1811	2.29158	1	1	wild	LeafDeadleaf	-0.546795	ID.21.1811	ID.21
1811	2.29158	1	1	wild	BranchStickTwig	-0.546795	ID.21.1811	ID.21
1811	2.29158	1	1	wild	LeafDeadleaf	-0.546795	ID.21.1811	ID.21
1812	2.29432	1	2	wild	BranchStickTwig	-0.545321	ID.21.1812	ID.21
1812	2.29432	1	2	wild	Bark	-0.545321	ID.21.1812	ID.21
1812	2.29432	1	2	wild	LeafDeadleaf	-0.545321	ID.21.1812	ID.21
1812	2.29432	1	2	wild	LeafDeadleaf	-0.545321	ID.21.1812	ID.21
1812	2.29432	1	1	wild	BranchStickTwig	-0.545321	ID.21.1812	ID.21
1812	2.29432	1	1	wild	BranchStickTwig	-0.545321	ID.21.1812	ID.21
1812	2.29432	1	1	wild	BranchStickTwig	-0.545321	ID.21.1812	ID.21
1812	2.29432	1	2	wild	BranchStickTwig	-0.545321	ID.21.1812	ID.21
1812	2.29432	1	2	wild	BranchStickTwig	-0.545321	ID.21.1812	ID.21
1812	2.29432	1	2	wild	BranchStickTwig	-0.545321	ID.21.1812	ID.21
1812	2.29432	1	1	wild	BranchStickTwig	-0.545321	ID.21.1812	ID.21
1812	2.29432	1	2	wild	BranchStickTwig	-0.545321	ID.21.1812	ID.21
1812	2.29432	1	1	wild	BranchStickTwig	-0.545321	ID.21.1812	ID.21
1812	2.29432	1	1	wild	Treefork	-0.545321	ID.21.1812	ID.21
1812	2.29432	1	1	wild	BranchStickTwig	-0.545321	ID.21.1812	ID.21
1812	2.29432	1	1	wild	Bark	-0.545321	ID.21.1812	ID.21
1812	2.29432	1	1	wild	BranchStickTwig	-0.545321	ID.21.1812	ID.21
1812	2.29432	1	1	wild	BranchStickTwig	-0.545321	ID.21.1812	ID.21
1812	2.29432	1	2	wild	BranchStickTwig	-0.545321	ID.21.1812	ID.21
1812	2.29432	1	3	wild	LeafDeadleaf	-0.545321	ID.21.1812	ID.21
1812	2.29432	1	2	wild	BranchStickTwig	-0.545321	ID.21.1812	ID.21
1812	2.29432	1	2	wild	BranchStickTwig	-0.545321	ID.21.1812	ID.21
1812	2.29432	1	3	wild	LeafDeadleaf	-0.545321	ID.21.1812	ID.21
1812	2.29432	1	2	wild	BranchStickTwig	-0.545321	ID.21.1812	ID.21
1812	2.29432	1	2	wild	BranchStickTwig	-0.545321	ID.21.1812	ID.21
1812	2.29432	1	1	wild	BranchStickTwig	-0.545321	ID.21.1812	ID.21
1812	2.29432	1	3	wild	Treefork	-0.545321	ID.21.1812	ID.21
1812	2.29432	1	1	wild	LeafDeadleaf	-0.545321	ID.21.1812	ID.21
1812	2.29432	1	2	wild	dead leaf	-0.545321	ID.21.1812	ID.21
1812	2.29432	1	1	wild	LeafDeadleaf	-0.545321	ID.21.1812	ID.21
1812	2.29432	1	2	wild	Treefork	-0.545321	ID.21.1812	ID.21
1812	2.29432	1	2	wild	Treetrunk	-0.545321	ID.21.1812	ID.21
1812	2.29432	1	1	wild	BranchStickTwig	-0.545321	ID.21.1812	ID.21
1812	2.29432	1	2	wild	BranchStickTwig	-0.545321	ID.21.1812	ID.21
1812	2.29432	1	3	wild	BranchStickTwig	-0.545321	ID.21.1812	ID.21
1812	2.29432	1	1	wild	BranchStickTwig	-0.545321	ID.21.1812	ID.21
1814	4.87885	1	2	wild	BranchStickTwig	0.385643	ID.10.1814	ID.10
1814	4.87885	1	1	wild	BranchStickTwig	0.385643	ID.10.1814	ID.10
1814	4.87885	1	1	wild	BranchStickTwig	0.385643	ID.10.1814	ID.10
1814	4.87885	1	3	wild	BranchStickTwig	0.385643	ID.10.1814	ID.10
1814	4.87885	1	2	wild	Bark	0.385643	ID.10.1814	ID.10
1814	4.87885	1	2	wild	Bark	0.385643	ID.10.1814	ID.10
1814	4.87885	1	2	wild	BranchStickTwig	0.385643	ID.10.1814	ID.10
1814	4.87885	1	2	wild	BranchStickTwig	0.385643	ID.10.1814	ID.10
1814	4.87885	1	2	wild	BranchStickTwig	0.385643	ID.10.1814	ID.10
1814	4.87885	1	2	wild	BranchStickTwig	0.385643	ID.10.1814	ID.10
1814	4.87885	1	1	wild	BranchStickTwig	0.385643	ID.10.1814	ID.10
1814	4.87885	1	3	wild	BranchStickTwig	0.385643	ID.10.1814	ID.10
1814	4.87885	1	2	wild	BranchStickTwig	0.385643	ID.10.1814	ID.10
1814	4.87885	1	2	wild	BranchStickTwig	0.385643	ID.10.1814	ID.10
1814	4.87885	1	2	wild	BranchStickTwig	0.385643	ID.10.1814	ID.10
1814	4.87885	1	2	wild	BranchStickTwig	0.385643	ID.10.1814	ID.10
1814	4.87885	1	2	wild	BranchStickTwig	0.385643	ID.10.1814	ID.10
1814	4.87885	1	2	wild	BranchStickTwig	0.385643	ID.10.1814	ID.10
1814	4.87885	1	1	wild	Bark	0.385643	ID.10.1814	ID.10
1814	4.87885	1	2	wild	Bark	0.385643	ID.10.1814	ID.10
1814	4.87885	1	2	wild	BranchStickTwig	0.385643	ID.10.1814	ID.10
1814	4.87885	1	2	wild	BranchStickTwig	0.385643	ID.10.1814	ID.10
1814	4.87885	1	2	wild	BranchStickTwig	0.385643	ID.10.1814	ID.10
1814	4.87885	1	1	wild	BranchStickTwig	0.385643	ID.10.1814	ID.10
1814	4.87885	1	1	wild	BranchStickTwig	0.385643	ID.10.1814	ID.10
1814	4.87885	1	2	wild	BranchStickTwig	0.385643	ID.10.1814	ID.10
1814	4.87885	1	3	wild	BranchStickTwig	0.385643	ID.10.1814	ID.10
1814	4.87885	1	1	wild	BranchStickTwig	0.385643	ID.10.1814	ID.10
1814	4.87885	1	1	wild	BranchStickTwig	0.385643	ID.10.1814	ID.10
1814	4.87885	1	4	wild	BranchStickTwig	0.385643	ID.10.1814	ID.10
1814	4.87885	1	3	wild	BranchStickTwig	0.385643	ID.10.1814	ID.10
1814	4.87885	1	2	wild	Bark	0.385643	ID.10.1814	ID.10
1816	2.29706	1	1	wild	BranchStickTwig	-0.54385	ID.21.1816	ID.21
1816	2.29706	1	4	wild	LeafDeadleaf	-0.54385	ID.21.1816	ID.21
1816	2.29706	1	2	wild	Treetrunk	-0.54385	ID.21.1816	ID.21
1816	2.29706	1	1	wild	BranchStickTwig	-0.54385	ID.21.1816	ID.21
1816	2.29706	1	1	wild	BranchStickTwig	-0.54385	ID.21.1816	ID.21
1816	2.29706	1	4	wild	BranchStickTwig	-0.54385	ID.21.1816	ID.21
1816	2.29706	1	1	wild	dead leaf	-0.54385	ID.21.1816	ID.21
1816	2.29706	1	4	wild	BranchStickTwig	-0.54385	ID.21.1816	ID.21
1816	2.29706	1	2	wild	BranchStickTwig	-0.54385	ID.21.1816	ID.21
1816	2.29706	1	1	wild	BranchStickTwig	-0.54385	ID.21.1816	ID.21
1816	2.29706	1	2	wild	LeafDeadleaf	-0.54385	ID.21.1816	ID.21
1816	2.29706	1	1	wild	BranchStickTwig	-0.54385	ID.21.1816	ID.21
1816	2.29706	1	2	wild	LeafDeadleaf	-0.54385	ID.21.1816	ID.21
1816	2.29706	1	3	wild	BranchStickTwig	-0.54385	ID.21.1816	ID.21
1816	2.29706	1	2	wild	BranchStickTwig	-0.54385	ID.21.1816	ID.21
1816	2.29706	1	2	wild	BranchStickTwig	-0.54385	ID.21.1816	ID.21
1816	2.29706	1	2	wild	LeafDeadleaf	-0.54385	ID.21.1816	ID.21
1816	2.29706	1	2	wild	BranchStickTwig	-0.54385	ID.21.1816	ID.21
1816	2.29706	1	1	wild	BranchStickTwig	-0.54385	ID.21.1816	ID.21
1816	2.29706	1	2	wild	BranchStickTwig	-0.54385	ID.21.1816	ID.21
1816	2.29706	1	2	wild	BranchStickTwig	-0.54385	ID.21.1816	ID.21
1816	2.29706	1	2	wild	BranchStickTwig	-0.54385	ID.21.1816	ID.21
1816	2.29706	1	2	wild	BranchStickTwig	-0.54385	ID.21.1816	ID.21
1816	2.29706	1	2	wild	BranchStickTwig	-0.54385	ID.21.1816	ID.21
1816	2.29706	1	3	wild	BranchStickTwig	-0.54385	ID.21.1816	ID.21
1816	2.29706	1	2	wild	BranchStickTwig	-0.54385	ID.21.1816	ID.21
1816	2.29706	1	2	wild	LeafDeadleaf	-0.54385	ID.21.1816	ID.21
1816	2.29706	1	3	wild	BranchStickTwig	-0.54385	ID.21.1816	ID.21
1816	2.29706	1	2	wild	BranchStickTwig	-0.54385	ID.21.1816	ID.21
1816	2.29706	1	2	wild	BranchStickTwig	-0.54385	ID.21.1816	ID.21
1820	2.2998	1	1	wild	BranchStickTwig	-0.54238	ID.21.1820	ID.21
1820	2.2998	1	2	wild	Bark	-0.54238	ID.21.1820	ID.21
1820	2.2998	1	1	wild	BranchStickTwig	-0.54238	ID.21.1820	ID.21
1820	2.2998	1	1	wild	BranchStickTwig	-0.54238	ID.21.1820	ID.21
1820	2.2998	1	1	wild	BranchStickTwig	-0.54238	ID.21.1820	ID.21
1820	2.2998	1	3	wild	Bark	-0.54238	ID.21.1820	ID.21
1820	2.2998	1	2	wild	LeafDeadleaf	-0.54238	ID.21.1820	ID.21
1820	2.2998	1	2	wild	BranchStickTwig	-0.54238	ID.21.1820	ID.21
1820	2.2998	1	3	wild	Bark	-0.54238	ID.21.1820	ID.21
1820	2.2998	1	1	wild	BranchStickTwig	-0.54238	ID.21.1820	ID.21
1820	2.2998	1	2	wild	LeafDeadleaf	-0.54238	ID.21.1820	ID.21
1820	2.2998	1	2	wild	BranchStickTwig	-0.54238	ID.21.1820	ID.21
1820	2.2998	1	2	wild	BranchStickTwig	-0.54238	ID.21.1820	ID.21
1820	2.2998	1	1	wild	dead leaf	-0.54238	ID.21.1820	ID.21
1820	2.2998	1	1	wild	dead leaf	-0.54238	ID.21.1820	ID.21
1820	2.2998	1	1	wild	LeafDeadleaf	-0.54238	ID.21.1820	ID.21
1820	2.2998	1	1	wild	LeafDeadleaf	-0.54238	ID.21.1820	ID.21
1820	2.2998	1	1	wild	BranchStickTwig	-0.54238	ID.21.1820	ID.21
1820	2.2998	1	1	wild	Bark	-0.54238	ID.21.1820	ID.21
1820	2.2998	1	2	wild	BranchStickTwig	-0.54238	ID.21.1820	ID.21
1820	2.2998	1	1	wild	Bark	-0.54238	ID.21.1820	ID.21
1820	2.2998	1	1	wild	BranchStickTwig	-0.54238	ID.21.1820	ID.21
1820	2.2998	1	1	wild	LeafDeadleaf	-0.54238	ID.21.1820	ID.21
1820	2.2998	1	1	wild	Bark	-0.54238	ID.21.1820	ID.21
1820	2.2998	1	1	wild	LeafDeadleaf	-0.54238	ID.21.1820	ID.21
1820	2.2998	1	1	wild	BranchStickTwig	-0.54238	ID.21.1820	ID.21
1820	2.2998	1	2	wild	LeafDeadleaf	-0.54238	ID.21.1820	ID.21
1820	2.2998	1	1	wild	BranchStickTwig	-0.54238	ID.21.1820	ID.21
1820	2.2998	1	1	wild	BranchStickTwig	-0.54238	ID.21.1820	ID.21
1820	2.2998	1	2	wild	Bark	-0.54238	ID.21.1820	ID.21
1820	2.2998	1	1	wild	LeafDeadleaf	-0.54238	ID.21.1820	ID.21
1824	4.8898	1	2	wild	Bark	0.38841	ID.10.1824	ID.10
1824	4.8898	1	2	wild	dead leaf	0.38841	ID.10.1824	ID.10
1824	4.8898	1	2	wild	Bark	0.38841	ID.10.1824	ID.10
1824	4.8898	1	2	wild	dead leaf	0.38841	ID.10.1824	ID.10
1824	4.8898	1	2	wild	BranchStickTwig	0.38841	ID.10.1824	ID.10
1824	4.8898	1	2	wild	LeafDeadleaf	0.38841	ID.10.1824	ID.10
1824	4.8898	1	1	wild	dead leaf	0.38841	ID.10.1824	ID.10
1824	4.8898	1	1	wild	LeafDeadleaf	0.38841	ID.10.1824	ID.10
1824	4.8898	1	1	wild	dead leaf	0.38841	ID.10.1824	ID.10
1824	4.8898	1	1	wild	LeafDeadleaf	0.38841	ID.10.1824	ID.10
1824	4.8898	1	2	wild	Bark	0.38841	ID.10.1824	ID.10
1824	4.8898	1	2	wild	BranchStickTwig	0.38841	ID.10.1824	ID.10
1824	4.8898	1	2	wild	Bark	0.38841	ID.10.1824	ID.10
1824	4.8898	1	2	wild	BranchStickTwig	0.38841	ID.10.1824	ID.10
1824	4.8898	1	2	wild	BranchStickTwig	0.38841	ID.10.1824	ID.10
1824	4.8898	1	1	wild	Bark	0.38841	ID.10.1824	ID.10
1824	4.8898	1	1	wild	BranchStickTwig	0.38841	ID.10.1824	ID.10
1824	4.8898	1	3	wild	Treefork	0.38841	ID.10.1824	ID.10
1824	4.8898	1	2	wild	Bark	0.38841	ID.10.1824	ID.10
1824	4.8898	1	2	wild	BranchStickTwig	0.38841	ID.10.1824	ID.10
1824	4.8898	1	1	wild	BranchStickTwig	0.38841	ID.10.1824	ID.10
1828	4.89254	1	3	wild	BranchStickTwig	0.3891	ID.10.1828	ID.10
1828	4.89254	1	2	wild	BranchStickTwig	0.3891	ID.10.1828	ID.10
1828	4.89254	1	4	wild	BranchStickTwig	0.3891	ID.10.1828	ID.10
1828	4.89254	1	2	wild	BranchStickTwig	0.3891	ID.10.1828	ID.10
1828	4.89254	1	2	wild	Bark	0.3891	ID.10.1828	ID.10
1828	4.89254	1	2	wild	BranchStickTwig	0.3891	ID.10.1828	ID.10
1828	4.89254	1	2	wild	Bark	0.3891	ID.10.1828	ID.10
1828	4.89254	1	2	wild	BranchStickTwig	0.3891	ID.10.1828	ID.10
1828	4.89254	1	3	wild	Bark	0.3891	ID.10.1828	ID.10
1828	4.89254	1	2	wild	BranchStickTwig	0.3891	ID.10.1828	ID.10
1828	4.89254	1	3	wild	BranchStickTwig	0.3891	ID.10.1828	ID.10
1828	4.89254	1	1	wild	Treetrunk	0.3891	ID.10.1828	ID.10
1828	4.89254	1	2	wild	BranchStickTwig	0.3891	ID.10.1828	ID.10
1828	4.89254	1	1	wild	Treetrunk	0.3891	ID.10.1828	ID.10
1828	4.89254	1	1	wild	Treetrunk	0.3891	ID.10.1828	ID.10
1828	4.89254	1	3	wild	BranchStickTwig	0.3891	ID.10.1828	ID.10
1828	4.89254	1	2	wild	Bark	0.3891	ID.10.1828	ID.10
1836	4.90349	1	4	wild	BranchStickTwig	0.391859	ID.10.1836	ID.10
1836	4.90349	1	1	wild	Treetrunk	0.391859	ID.10.1836	ID.10
1828	4.89254	1	1	wild	BranchStickTwig	0.3891	ID.10.1828	ID.10
1828	4.89254	1	2	wild	BranchStickTwig	0.3891	ID.10.1828	ID.10
1828	4.89254	1	2	wild	BranchStickTwig	0.3891	ID.10.1828	ID.10
1832	4.89528	1	5	wild	BranchStickTwig	0.389791	ID.10.1832	ID.10
1832	4.89528	1	2	wild	LeafDeadleaf	0.389791	ID.10.1832	ID.10
1832	4.89528	1	2	wild	BranchStickTwig	0.389791	ID.10.1832	ID.10
1832	4.89528	1	2	wild	BranchStickTwig	0.389791	ID.10.1832	ID.10
1832	4.89528	1	3	wild	BranchStickTwig	0.389791	ID.10.1832	ID.10
1832	4.89528	1	2	wild	BranchStickTwig	0.389791	ID.10.1832	ID.10
1832	4.89528	1	2	wild	BranchStickTwig	0.389791	ID.10.1832	ID.10
1832	4.89528	1	2	wild	LeafDeadleaf	0.389791	ID.10.1832	ID.10
1832	4.89528	1	2	wild	BranchStickTwig	0.389791	ID.10.1832	ID.10
1832	4.89528	1	2	wild	BranchStickTwig	0.389791	ID.10.1832	ID.10
1832	4.89528	1	2	wild	BranchStickTwig	0.389791	ID.10.1832	ID.10
1832	4.89528	1	2	wild	BranchStickTwig	0.389791	ID.10.1832	ID.10
1832	4.89528	1	2	wild	BranchStickTwig	0.389791	ID.10.1832	ID.10
1832	4.89528	1	2	wild	LeafDeadleaf	0.389791	ID.10.1832	ID.10
1832	4.89528	1	2	wild	BranchStickTwig	0.389791	ID.10.1832	ID.10
1832	4.89528	1	3	wild	BranchStickTwig	0.389791	ID.10.1832	ID.10
1832	4.89528	1	1	wild	BranchStickTwig	0.389791	ID.10.1832	ID.10
1832	4.89528	1	2	wild	LeafDeadleaf	0.389791	ID.10.1832	ID.10
1832	4.89528	1	2	wild	BranchStickTwig	0.389791	ID.10.1832	ID.10
1832	4.89528	1	1	wild	Treetrunk	0.389791	ID.10.1832	ID.10
1832	4.89528	1	2	wild	Bark	0.389791	ID.10.1832	ID.10
1832	4.89528	1	2	wild	Bark	0.389791	ID.10.1832	ID.10
1832	4.89528	1	3	wild	BranchStickTwig	0.389791	ID.10.1832	ID.10
1832	4.89528	1	1	wild	Bark	0.389791	ID.10.1832	ID.10
1832	4.89528	1	2	wild	Bark	0.389791	ID.10.1832	ID.10
1832	4.89528	1	1	wild	Bark	0.389791	ID.10.1832	ID.10
1832	4.89528	1	2	wild	BranchStickTwig	0.389791	ID.10.1832	ID.10
1832	4.89528	1	3	wild	BranchStickTwig	0.389791	ID.10.1832	ID.10
1832	4.89528	1	3	wild	Bark	0.389791	ID.10.1832	ID.10
1832	4.89528	1	2	wild	Bark	0.389791	ID.10.1832	ID.10
1832	4.89528	1	1	wild	BranchStickTwig	0.389791	ID.10.1832	ID.10
1832	4.89528	1	1	wild	Bark	0.389791	ID.10.1832	ID.10
1832	4.89528	1	2	wild	BranchStickTwig	0.389791	ID.10.1832	ID.10
1832	4.89528	1	2	wild	BranchStickTwig	0.389791	ID.10.1832	ID.10
1836	4.90349	1	2	wild	BranchStickTwig	0.391859	ID.10.1836	ID.10
1836	4.90349	1	5	wild	BranchStickTwig	0.391859	ID.10.1836	ID.10
1836	4.90349	1	4	wild	BranchStickTwig	0.391859	ID.10.1836	ID.10
1836	4.90349	1	2	wild	BranchStickTwig	0.391859	ID.10.1836	ID.10
[truncated: 1,646 more rows]

## Sheet: model 2c
followNr	AgeAtThatTime	NumberOfBodyParts	Wild_Zoo	z.log.AgeAtThatTime	follow.in.subj	FocalName
67	1.66461	1	wild	-1.02276	ID.38. 67	ID.38
126	2.41478	1	wild	-0.592862	ID.48. 126	ID.48
126	2.41478	1	wild	-0.592862	ID.48. 126	ID.48
126	2.41478	1	wild	-0.592862	ID.48. 126	ID.48
126	2.41478	1	wild	-0.592862	ID.48. 126	ID.48
132	2.423	1	wild	-0.588938	ID.48. 132	ID.48
136	2.42847	1	wild	-0.586329	ID.48. 136	ID.48
2895	59.5483	2	wild	3.11098	ID.36.2895	ID.36
164	6.75702	1	wild	0.596198	ID.42. 164	ID.42
164	6.75702	2	wild	0.596198	ID.42. 164	ID.42
164	6.75702	1	wild	0.596198	ID.42. 164	ID.42
164	6.75702	1	wild	0.596198	ID.42. 164	ID.42
172	8.81314	1	wild	0.903193	ID.49. 172	ID.49
172	8.81314	1	wild	0.903193	ID.49. 172	ID.49
174	8.81862	1	wild	0.903911	ID.49. 174	ID.49
184	5.03491	1	wild	0.256242	ID.20. 184	ID.20
184	5.03491	2	wild	0.256242	ID.20. 184	ID.20
186	2.03696	1	wild	-0.789485	ID.38. 186	ID.38
204	6.94045	1	wild	0.627151	ID.42. 204	ID.42
204	6.94045	1	wild	0.627151	ID.42. 204	ID.42
208	6.94593	1	wild	0.628062	ID.42. 208	ID.42
208	6.94593	1	wild	0.628062	ID.42. 208	ID.42
208	6.94593	1	wild	0.628062	ID.42. 208	ID.42
210	2.69952	1	wild	-0.464056	ID.48. 210	ID.48
214	2.70226	1	wild	-0.462884	ID.48. 214	ID.48
214	2.70226	1	wild	-0.462884	ID.48. 214	ID.48
214	2.70226	1	wild	-0.462884	ID.48. 214	ID.48
214	2.70226	1	wild	-0.462884	ID.48. 214	ID.48
214	2.70226	1	wild	-0.462884	ID.48. 214	ID.48
215	8.95825	2	wild	0.922065	ID.49. 215	ID.49
220	2.70773	1	wild	-0.460545	ID.48. 220	ID.48
228	2.71595	2	wild	-0.457045	ID.48. 228	ID.48
235	5.14168	1	wild	0.280493	ID.20. 235	ID.20
238	5.14442	1	wild	0.281108	ID.20. 238	ID.20
238	5.14442	1	wild	0.281108	ID.20. 238	ID.20
238	5.14442	1	wild	0.281108	ID.20. 238	ID.20
238	5.14442	1	wild	0.281108	ID.20. 238	ID.20
242	5.1499	1	wild	0.282337	ID.20. 242	ID.20
245	5.15264	1	wild	0.282951	ID.20. 245	ID.20
245	5.15264	1	wild	0.282951	ID.20. 245	ID.20
251	7.02532	1	wild	0.641197	ID.42. 251	ID.42
251	7.02532	1	wild	0.641197	ID.42. 251	ID.42
251	7.02532	1	wild	0.641197	ID.42. 251	ID.42
261	7.0527	2	wild	0.645692	ID.42. 261	ID.42
423	9.86174	2	wild	1.0331	ID.49. 423	ID.49
305	2.97604	3	wild	-0.351363	ID.48. 305	ID.48
305	2.97604	1	wild	-0.351363	ID.48. 305	ID.48
314	2.98973	1	wild	-0.34606	ID.48. 314	ID.48
314	2.98973	1	wild	-0.34606	ID.48. 314	ID.48
314	2.98973	1	wild	-0.34606	ID.48. 314	ID.48
314	2.98973	1	wild	-0.34606	ID.48. 314	ID.48
314	2.98973	1	wild	-0.34606	ID.48. 314	ID.48
314	2.98973	1	wild	-0.34606	ID.48. 314	ID.48
330	10.4476	1	wild	1.09979	ID.31. 330	ID.31
330	10.4476	1	wild	1.09979	ID.31. 330	ID.31
385	7.66324	1	wild	0.741633	ID.42. 385	ID.42
385	7.66324	1	wild	0.741633	ID.42. 385	ID.42
2895	59.5483	2	wild	3.11098	ID.36.2895	ID.36
430	3.6167	1	wild	-0.126062	ID.48. 430	ID.48
430	3.6167	1	wild	-0.126062	ID.48. 430	ID.48
430	3.6167	1	wild	-0.126062	ID.48. 430	ID.48
434	3.61944	1	wild	-0.125188	ID.48. 434	ID.48
436	3.62218	1	wild	-0.124314	ID.48. 436	ID.48
436	3.62218	1	wild	-0.124314	ID.48. 436	ID.48
447	7.91239	2	wild	0.778605	ID.42. 447	ID.42
514	10.1547	1	wild	1.06693	ID.49. 514	ID.49
515	10.1574	1	wild	1.06724	ID.49. 515	ID.49
638	11.7536	1	wild	1.2359	ID.49. 638	ID.49
639	11.7563	1	wild	1.23617	ID.49. 639	ID.49
645	7.93703	1	wild	0.782198	ID.20. 645	ID.20
645	7.93703	2	wild	0.782198	ID.20. 645	ID.20
645	7.93703	1	wild	0.782198	ID.20. 645	ID.20
646	7.93977	1	wild	0.782597	ID.20. 646	ID.20
651	12.8624	1	wild	1.34008	ID.47. 651	ID.47
651	12.8624	1	wild	1.34008	ID.47. 651	ID.47
656	5.54415	1	wild	0.36758	ID.48. 656	ID.48
656	5.54415	1	wild	0.36758	ID.48. 656	ID.48
656	5.54415	1	wild	0.36758	ID.48. 656	ID.48
656	5.54415	1	wild	0.36758	ID.48. 656	ID.48
656	5.54415	2	wild	0.36758	ID.48. 656	ID.48
656	5.54415	1	wild	0.36758	ID.48. 656	ID.48
656	5.54415	1	wild	0.36758	ID.48. 656	ID.48
656	5.54415	1	wild	0.36758	ID.48. 656	ID.48
658	5.54689	1	wild	0.368151	ID.48. 658	ID.48
658	5.54689	1	wild	0.368151	ID.48. 658	ID.48
658	5.54689	1	wild	0.368151	ID.48. 658	ID.48
658	5.54689	1	wild	0.368151	ID.48. 658	ID.48
658	5.54689	1	wild	0.368151	ID.48. 658	ID.48
658	5.54689	1	wild	0.368151	ID.48. 658	ID.48
658	5.54689	1	wild	0.368151	ID.48. 658	ID.48
658	5.54689	1	wild	0.368151	ID.48. 658	ID.48
658	5.54689	1	wild	0.368151	ID.48. 658	ID.48
658	5.54689	1	wild	0.368151	ID.48. 658	ID.48
658	5.54689	1	wild	0.368151	ID.48. 658	ID.48
658	5.54689	1	wild	0.368151	ID.48. 658	ID.48
658	5.54689	1	wild	0.368151	ID.48. 658	ID.48
658	5.54689	1	wild	0.368151	ID.48. 658	ID.48
658	5.54689	1	wild	0.368151	ID.48. 658	ID.48
658	5.54689	1	wild	0.368151	ID.48. 658	ID.48
659	5.54962	1	wild	0.368721	ID.48. 659	ID.48
659	5.54962	2	wild	0.368721	ID.48. 659	ID.48
659	5.54962	1	wild	0.368721	ID.48. 659	ID.48
659	5.54962	1	wild	0.368721	ID.48. 659	ID.48
659	5.54962	1	wild	0.368721	ID.48. 659	ID.48
659	5.54962	1	wild	0.368721	ID.48. 659	ID.48
659	5.54962	2	wild	0.368721	ID.48. 659	ID.48
659	5.54962	1	wild	0.368721	ID.48. 659	ID.48
659	5.54962	1	wild	0.368721	ID.48. 659	ID.48
659	5.54962	1	wild	0.368721	ID.48. 659	ID.48
659	5.54962	1	wild	0.368721	ID.48. 659	ID.48
659	5.54962	1	wild	0.368721	ID.48. 659	ID.48
659	5.54962	3	wild	0.368721	ID.48. 659	ID.48
662	5.5551	1	wild	0.36986	ID.48. 662	ID.48
662	5.5551	1	wild	0.36986	ID.48. 662	ID.48
662	5.5551	1	wild	0.36986	ID.48. 662	ID.48
662	5.5551	1	wild	0.36986	ID.48. 662	ID.48
662	5.5551	1	wild	0.36986	ID.48. 662	ID.48
662	5.5551	1	wild	0.36986	ID.48. 662	ID.48
664	5.55784	1	wild	0.37043	ID.48. 664	ID.48
664	5.55784	1	wild	0.37043	ID.48. 664	ID.48
664	5.55784	1	wild	0.37043	ID.48. 664	ID.48
1036	0.889802	1	wild	-1.74656	ID.19.1036	ID.19
664	5.55784	1	wild	0.37043	ID.48. 664	ID.48
664	5.55784	2	wild	0.37043	ID.48. 664	ID.48
664	5.55784	1	wild	0.37043	ID.48. 664	ID.48
664	5.55784	2	wild	0.37043	ID.48. 664	ID.48
664	5.55784	1	wild	0.37043	ID.48. 664	ID.48
664	5.55784	1	wild	0.37043	ID.48. 664	ID.48
664	5.55784	1	wild	0.37043	ID.48. 664	ID.48
664	5.55784	1	wild	0.37043	ID.48. 664	ID.48
664	5.55784	1	wild	0.37043	ID.48. 664	ID.48
664	5.55784	1	wild	0.37043	ID.48. 664	ID.48
664	5.55784	1	wild	0.37043	ID.48. 664	ID.48
664	5.55784	1	wild	0.37043	ID.48. 664	ID.48
675	11.8658	1	wild	1.24689	ID.49. 675	ID.49
676	11.8686	1	wild	1.24715	ID.49. 676	ID.49
676	11.8686	1	wild	1.24715	ID.49. 676	ID.49
678	8.03285	1	wild	0.796066	ID.20. 678	ID.20
682	11.8768	1	wild	1.24795	ID.49. 682	ID.49
684	5.62355	1	wild	0.384012	ID.48. 684	ID.48
684	5.62355	1	wild	0.384012	ID.48. 684	ID.48
684	5.62355	1	wild	0.384012	ID.48. 684	ID.48
684	5.62355	1	wild	0.384012	ID.48. 684	ID.48
684	5.62355	1	wild	0.384012	ID.48. 684	ID.48
686	5.62628	1	wild	0.384574	ID.48. 686	ID.48
686	5.62628	1	wild	0.384574	ID.48. 686	ID.48
686	5.62628	1	wild	0.384574	ID.48. 686	ID.48
686	5.62628	1	wild	0.384574	ID.48. 686	ID.48
686	5.62628	1	wild	0.384574	ID.48. 686	ID.48
686	5.62628	1	wild	0.384574	ID.48. 686	ID.48
686	5.62628	1	wild	0.384574	ID.48. 686	ID.48
686	5.62628	1	wild	0.384574	ID.48. 686	ID.48
686	5.62628	1	wild	0.384574	ID.48. 686	ID.48
686	5.62628	1	wild	0.384574	ID.48. 686	ID.48
686	5.62628	1	wild	0.384574	ID.48. 686	ID.48
686	5.62628	1	wild	0.384574	ID.48. 686	ID.48
686	5.62628	1	wild	0.384574	ID.48. 686	ID.48
686	5.62628	1	wild	0.384574	ID.48. 686	ID.48
686	5.62628	1	wild	0.384574	ID.48. 686	ID.48
686	5.62628	1	wild	0.384574	ID.48. 686	ID.48
686	5.62628	1	wild	0.384574	ID.48. 686	ID.48
686	5.62628	1	wild	0.384574	ID.48. 686	ID.48
686	5.62628	1	wild	0.384574	ID.48. 686	ID.48
686	5.62628	1	wild	0.384574	ID.48. 686	ID.48
688	5.62902	1	wild	0.385136	ID.48. 688	ID.48
688	5.62902	1	wild	0.385136	ID.48. 688	ID.48
688	5.62902	1	wild	0.385136	ID.48. 688	ID.48
688	5.62902	1	wild	0.385136	ID.48. 688	ID.48
688	5.62902	1	wild	0.385136	ID.48. 688	ID.48
688	5.62902	1	wild	0.385136	ID.48. 688	ID.48
688	5.62902	2	wild	0.385136	ID.48. 688	ID.48
688	5.62902	2	wild	0.385136	ID.48. 688	ID.48
690	5.63176	1	wild	0.385698	ID.48. 690	ID.48
690	5.63176	1	wild	0.385698	ID.48. 690	ID.48
690	5.63176	1	wild	0.385698	ID.48. 690	ID.48
692	8.04928	1	wild	0.798427	ID.20. 692	ID.20
692	8.04928	1	wild	0.798427	ID.20. 692	ID.20
692	8.04928	1	wild	0.798427	ID.20. 692	ID.20
692	8.04928	1	wild	0.798427	ID.20. 692	ID.20
692	8.04928	1	wild	0.798427	ID.20. 692	ID.20
692	8.04928	1	wild	0.798427	ID.20. 692	ID.20
692	8.04928	1	wild	0.798427	ID.20. 692	ID.20
692	8.04928	1	wild	0.798427	ID.20. 692	ID.20
692	8.04928	1	wild	0.798427	ID.20. 692	ID.20
692	8.04928	1	wild	0.798427	ID.20. 692	ID.20
692	8.04928	1	wild	0.798427	ID.20. 692	ID.20
695	8.05202	1	wild	0.79882	ID.20. 695	ID.20
695	8.05202	1	wild	0.79882	ID.20. 695	ID.20
705	12.9747	1	wild	1.35012	ID.47. 705	ID.47
707	12.9774	1	wild	1.35036	ID.47. 707	ID.47
707	12.9774	1	wild	1.35036	ID.47. 707	ID.47
712	12.9856	1	wild	1.3511	ID.47. 712	ID.47
712	12.9856	2	wild	1.3511	ID.47. 712	ID.47
712	12.9856	1	wild	1.3511	ID.47. 712	ID.47
718	11.9151	1	wild	1.25168	ID.49. 718	ID.49
721	11.9233	1	wild	1.25247	ID.49. 721	ID.49
721	11.9233	1	wild	1.25247	ID.49. 721	ID.49
721	11.9233	1	wild	1.25247	ID.49. 721	ID.49
721	11.9233	1	wild	1.25247	ID.49. 721	ID.49
721	11.9233	1	wild	1.25247	ID.49. 721	ID.49
723	11.9288	1	wild	1.253	ID.49. 723	ID.49
2745	27.1102	2	wild	2.20168	ID.41.2745	ID.41
2764	26.7871	2	wild	2.18783	ID.5.2764	ID.5
2946	27.2882	1	wild	2.20924	ID.5.2946	ID.5
1864	6.65571	3	wild	0.578743	ID.9.1864	ID.9
999	2.8501	1	wild	-0.40133	ID.9. 999	ID.9
736	0.52293	1	wild	-2.36081	ID.9. 736	ID.9
736	0.52293	1	wild	-2.36081	ID.9. 736	ID.9
736	0.52293	1	wild	-2.36081	ID.9. 736	ID.9
736	0.52293	1	wild	-2.36081	ID.9. 736	ID.9
736	0.52293	1	wild	-2.36081	ID.9. 736	ID.9
736	0.52293	1	wild	-2.36081	ID.9. 736	ID.9
736	0.52293	1	wild	-2.36081	ID.9. 736	ID.9
1036	0.889802	1	wild	-1.74656	ID.19.1036	ID.19
736	0.52293	1	wild	-2.36081	ID.9. 736	ID.9
736	0.52293	1	wild	-2.36081	ID.9. 736	ID.9
739	0.525667	1	wild	-2.35477	ID.9. 739	ID.9
739	0.525667	1	wild	-2.35477	ID.9. 739	ID.9
739	0.525667	1	wild	-2.35477	ID.9. 739	ID.9
739	0.525667	1	wild	-2.35477	ID.9. 739	ID.9
739	0.525667	1	wild	-2.35477	ID.9. 739	ID.9
739	0.525667	1	wild	-2.35477	ID.9. 739	ID.9
739	0.525667	1	wild	-2.35477	ID.9. 739	ID.9
739	0.525667	1	wild	-2.35477	ID.9. 739	ID.9
739	0.525667	1	wild	-2.35477	ID.9. 739	ID.9
739	0.525667	1	wild	-2.35477	ID.9. 739	ID.9
739	0.525667	1	wild	-2.35477	ID.9. 739	ID.9
739	0.525667	1	wild	-2.35477	ID.9. 739	ID.9
739	0.525667	1	wild	-2.35477	ID.9. 739	ID.9
739	0.525667	1	wild	-2.35477	ID.9. 739	ID.9
739	0.525667	1	wild	-2.35477	ID.9. 739	ID.9
739	0.525667	2	wild	-2.35477	ID.9. 739	ID.9
739	0.525667	1	wild	-2.35477	ID.9. 739	ID.9
739	0.525667	1	wild	-2.35477	ID.9. 739	ID.9
739	0.525667	1	wild	-2.35477	ID.9. 739	ID.9
739	0.525667	1	wild	-2.35477	ID.9. 739	ID.9
739	0.525667	1	wild	-2.35477	ID.9. 739	ID.9
739	0.525667	1	wild	-2.35477	ID.9. 739	ID.9
739	0.525667	1	wild	-2.35477	ID.9. 739	ID.9
739	0.525667	1	wild	-2.35477	ID.9. 739	ID.9
739	0.525667	1	wild	-2.35477	ID.9. 739	ID.9
739	0.525667	1	wild	-2.35477	ID.9. 739	ID.9
739	0.525667	1	wild	-2.35477	ID.9. 739	ID.9
739	0.525667	1	wild	-2.35477	ID.9. 739	ID.9
739	0.525667	1	wild	-2.35477	ID.9. 739	ID.9
739	0.525667	1	wild	-2.35477	ID.9. 739	ID.9
742	0.528405	1	wild	-2.34877	ID.9. 742	ID.9
742	0.528405	1	wild	-2.34877	ID.9. 742	ID.9
742	0.528405	1	wild	-2.34877	ID.9. 742	ID.9
742	0.528405	1	wild	-2.34877	ID.9. 742	ID.9
742	0.528405	1	wild	-2.34877	ID.9. 742	ID.9
742	0.528405	1	wild	-2.34877	ID.9. 742	ID.9
742	0.528405	1	wild	-2.34877	ID.9. 742	ID.9
742	0.528405	1	wild	-2.34877	ID.9. 742	ID.9
742	0.528405	1	wild	-2.34877	ID.9. 742	ID.9
742	0.528405	1	wild	-2.34877	ID.9. 742	ID.9
742	0.528405	1	wild	-2.34877	ID.9. 742	ID.9
742	0.528405	1	wild	-2.34877	ID.9. 742	ID.9
742	0.528405	1	wild	-2.34877	ID.9. 742	ID.9
742	0.528405	1	wild	-2.34877	ID.9. 742	ID.9
746	9.94935	1	wild	1.04332	ID.42. 746	ID.42
744	0.531143	1	wild	-2.3428	ID.9. 744	ID.9
744	0.531143	1	wild	-2.3428	ID.9. 744	ID.9
744	0.531143	1	wild	-2.3428	ID.9. 744	ID.9
744	0.531143	1	wild	-2.3428	ID.9. 744	ID.9
744	0.531143	1	wild	-2.3428	ID.9. 744	ID.9
747	0.533881	1	wild	-2.33686	ID.9. 747	ID.9
747	0.533881	1	wild	-2.33686	ID.9. 747	ID.9
747	0.533881	1	wild	-2.33686	ID.9. 747	ID.9
747	0.533881	1	wild	-2.33686	ID.9. 747	ID.9
747	0.533881	1	wild	-2.33686	ID.9. 747	ID.9
747	0.533881	1	wild	-2.33686	ID.9. 747	ID.9
747	0.533881	1	wild	-2.33686	ID.9. 747	ID.9
747	0.533881	1	wild	-2.33686	ID.9. 747	ID.9
747	0.533881	1	wild	-2.33686	ID.9. 747	ID.9
747	0.533881	1	wild	-2.33686	ID.9. 747	ID.9
747	0.533881	1	wild	-2.33686	ID.9. 747	ID.9
747	0.533881	1	wild	-2.33686	ID.9. 747	ID.9
747	0.533881	1	wild	-2.33686	ID.9. 747	ID.9
747	0.533881	1	wild	-2.33686	ID.9. 747	ID.9
747	0.533881	1	wild	-2.33686	ID.9. 747	ID.9
747	0.533881	1	wild	-2.33686	ID.9. 747	ID.9
747	0.533881	1	wild	-2.33686	ID.9. 747	ID.9
747	0.533881	1	wild	-2.33686	ID.9. 747	ID.9
747	0.533881	1	wild	-2.33686	ID.9. 747	ID.9
747	0.533881	1	wild	-2.33686	ID.9. 747	ID.9
747	0.533881	1	wild	-2.33686	ID.9. 747	ID.9
747	0.533881	1	wild	-2.33686	ID.9. 747	ID.9
747	0.533881	1	wild	-2.33686	ID.9. 747	ID.9
747	0.533881	1	wild	-2.33686	ID.9. 747	ID.9
747	0.533881	1	wild	-2.33686	ID.9. 747	ID.9
747	0.533881	1	wild	-2.33686	ID.9. 747	ID.9
747	0.533881	1	wild	-2.33686	ID.9. 747	ID.9
750	0.539357	1	wild	-2.32506	ID.9. 750	ID.9
750	0.539357	1	wild	-2.32506	ID.9. 750	ID.9
750	0.539357	1	wild	-2.32506	ID.9. 750	ID.9
750	0.539357	1	wild	-2.32506	ID.9. 750	ID.9
750	0.539357	1	wild	-2.32506	ID.9. 750	ID.9
750	0.539357	1	wild	-2.32506	ID.9. 750	ID.9
750	0.539357	1	wild	-2.32506	ID.9. 750	ID.9
750	0.539357	1	wild	-2.32506	ID.9. 750	ID.9
750	0.539357	1	wild	-2.32506	ID.9. 750	ID.9
750	0.539357	1	wild	-2.32506	ID.9. 750	ID.9
750	0.539357	1	wild	-2.32506	ID.9. 750	ID.9
750	0.539357	1	wild	-2.32506	ID.9. 750	ID.9
750	0.539357	1	wild	-2.32506	ID.9. 750	ID.9
750	0.539357	1	wild	-2.32506	ID.9. 750	ID.9
750	0.539357	1	wild	-2.32506	ID.9. 750	ID.9
750	0.539357	1	wild	-2.32506	ID.9. 750	ID.9
750	0.539357	1	wild	-2.32506	ID.9. 750	ID.9
750	0.539357	1	wild	-2.32506	ID.9. 750	ID.9
750	0.539357	1	wild	-2.32506	ID.9. 750	ID.9
750	0.539357	1	wild	-2.32506	ID.9. 750	ID.9
750	0.539357	1	wild	-2.32506	ID.9. 750	ID.9
750	0.539357	2	wild	-2.32506	ID.9. 750	ID.9
750	0.539357	1	wild	-2.32506	ID.9. 750	ID.9
750	0.539357	1	wild	-2.32506	ID.9. 750	ID.9
750	0.539357	1	wild	-2.32506	ID.9. 750	ID.9
750	0.539357	1	wild	-2.32506	ID.9. 750	ID.9
750	0.539357	1	wild	-2.32506	ID.9. 750	ID.9
750	0.539357	1	wild	-2.32506	ID.9. 750	ID.9
750	0.539357	1	wild	-2.32506	ID.9. 750	ID.9
750	0.539357	1	wild	-2.32506	ID.9. 750	ID.9
750	0.539357	1	wild	-2.32506	ID.9. 750	ID.9
750	0.539357	1	wild	-2.32506	ID.9. 750	ID.9
750	0.539357	1	wild	-2.32506	ID.9. 750	ID.9
750	0.539357	1	wild	-2.32506	ID.9. 750	ID.9
750	0.539357	1	wild	-2.32506	ID.9. 750	ID.9
750	0.539357	1	wild	-2.32506	ID.9. 750	ID.9
750	0.539357	2	wild	-2.32506	ID.9. 750	ID.9
750	0.539357	1	wild	-2.32506	ID.9. 750	ID.9
750	0.539357	1	wild	-2.32506	ID.9. 750	ID.9
750	0.539357	1	wild	-2.32506	ID.9. 750	ID.9
750	0.539357	1	wild	-2.32506	ID.9. 750	ID.9
750	0.539357	1	wild	-2.32506	ID.9. 750	ID.9
750	0.539357	1	wild	-2.32506	ID.9. 750	ID.9
750	0.539357	1	wild	-2.32506	ID.9. 750	ID.9
750	0.539357	1	wild	-2.32506	ID.9. 750	ID.9
750	0.539357	2	wild	-2.32506	ID.9. 750	ID.9
750	0.539357	1	wild	-2.32506	ID.9. 750	ID.9
750	0.539357	1	wild	-2.32506	ID.9. 750	ID.9
750	0.539357	1	wild	-2.32506	ID.9. 750	ID.9
750	0.539357	1	wild	-2.32506	ID.9. 750	ID.9
750	0.539357	1	wild	-2.32506	ID.9. 750	ID.9
750	0.539357	1	wild	-2.32506	ID.9. 750	ID.9
1038	0.892539	1	wild	-1.74301	ID.19.1038	ID.19
750	0.539357	1	wild	-2.32506	ID.9. 750	ID.9
752	0.542094	1	wild	-2.31921	ID.9. 752	ID.9
752	0.542094	1	wild	-2.31921	ID.9. 752	ID.9
752	0.542094	1	wild	-2.31921	ID.9. 752	ID.9
752	0.542094	1	wild	-2.31921	ID.9. 752	ID.9
752	0.542094	1	wild	-2.31921	ID.9. 752	ID.9
752	0.542094	1	wild	-2.31921	ID.9. 752	ID.9
752	0.542094	1	wild	-2.31921	ID.9. 752	ID.9
752	0.542094	1	wild	-2.31921	ID.9. 752	ID.9
752	0.542094	1	wild	-2.31921	ID.9. 752	ID.9
752	0.542094	1	wild	-2.31921	ID.9. 752	ID.9
752	0.542094	1	wild	-2.31921	ID.9. 752	ID.9
752	0.542094	1	wild	-2.31921	ID.9. 752	ID.9
752	0.542094	1	wild	-2.31921	ID.9. 752	ID.9
752	0.542094	1	wild	-2.31921	ID.9. 752	ID.9
752	0.542094	1	wild	-2.31921	ID.9. 752	ID.9
752	0.542094	1	wild	-2.31921	ID.9. 752	ID.9
752	0.542094	1	wild	-2.31921	ID.9. 752	ID.9
752	0.542094	1	wild	-2.31921	ID.9. 752	ID.9
752	0.542094	1	wild	-2.31921	ID.9. 752	ID.9
755	0.544832	1	wild	-2.31339	ID.9. 755	ID.9
755	0.544832	1	wild	-2.31339	ID.9. 755	ID.9
755	0.544832	1	wild	-2.31339	ID.9. 755	ID.9
755	0.544832	1	wild	-2.31339	ID.9. 755	ID.9
755	0.544832	1	wild	-2.31339	ID.9. 755	ID.9
755	0.544832	1	wild	-2.31339	ID.9. 755	ID.9
755	0.544832	1	wild	-2.31339	ID.9. 755	ID.9
755	0.544832	1	wild	-2.31339	ID.9. 755	ID.9
755	0.544832	1	wild	-2.31339	ID.9. 755	ID.9
755	0.544832	1	wild	-2.31339	ID.9. 755	ID.9
755	0.544832	1	wild	-2.31339	ID.9. 755	ID.9
755	0.544832	1	wild	-2.31339	ID.9. 755	ID.9
755	0.544832	1	wild	-2.31339	ID.9. 755	ID.9
755	0.544832	2	wild	-2.31339	ID.9. 755	ID.9
755	0.544832	1	wild	-2.31339	ID.9. 755	ID.9
755	0.544832	1	wild	-2.31339	ID.9. 755	ID.9
755	0.544832	1	wild	-2.31339	ID.9. 755	ID.9
755	0.544832	1	wild	-2.31339	ID.9. 755	ID.9
755	0.544832	1	wild	-2.31339	ID.9. 755	ID.9
755	0.544832	1	wild	-2.31339	ID.9. 755	ID.9
755	0.544832	1	wild	-2.31339	ID.9. 755	ID.9
755	0.544832	1	wild	-2.31339	ID.9. 755	ID.9
755	0.544832	1	wild	-2.31339	ID.9. 755	ID.9
755	0.544832	1	wild	-2.31339	ID.9. 755	ID.9
755	0.544832	1	wild	-2.31339	ID.9. 755	ID.9
755	0.544832	1	wild	-2.31339	ID.9. 755	ID.9
755	0.544832	1	wild	-2.31339	ID.9. 755	ID.9
755	0.544832	1	wild	-2.31339	ID.9. 755	ID.9
755	0.544832	1	wild	-2.31339	ID.9. 755	ID.9
755	0.544832	1	wild	-2.31339	ID.9. 755	ID.9
755	0.544832	1	wild	-2.31339	ID.9. 755	ID.9
757	0.54757	1	wild	-2.3076	ID.9. 757	ID.9
757	0.54757	1	wild	-2.3076	ID.9. 757	ID.9
757	0.54757	1	wild	-2.3076	ID.9. 757	ID.9
757	0.54757	1	wild	-2.3076	ID.9. 757	ID.9
757	0.54757	1	wild	-2.3076	ID.9. 757	ID.9
757	0.54757	1	wild	-2.3076	ID.9. 757	ID.9
757	0.54757	1	wild	-2.3076	ID.9. 757	ID.9
757	0.54757	1	wild	-2.3076	ID.9. 757	ID.9
758	9.97125	1	wild	1.04586	ID.42. 758	ID.42
758	9.97125	2	wild	1.04586	ID.42. 758	ID.42
758	9.97125	1	wild	1.04586	ID.42. 758	ID.42
758	9.97125	1	wild	1.04586	ID.42. 758	ID.42
758	9.97125	1	wild	1.04586	ID.42. 758	ID.42
758	9.97125	1	wild	1.04586	ID.42. 758	ID.42
758	9.97125	1	wild	1.04586	ID.42. 758	ID.42
758	9.97125	1	wild	1.04586	ID.42. 758	ID.42
760	9.97399	1	wild	1.04618	ID.42. 760	ID.42
760	9.97399	2	wild	1.04618	ID.42. 760	ID.42
760	9.97399	1	wild	1.04618	ID.42. 760	ID.42
760	9.97399	1	wild	1.04618	ID.42. 760	ID.42
766	5.73032	1	wild	0.405747	ID.48. 766	ID.48
766	5.73032	1	wild	0.405747	ID.48. 766	ID.48
766	5.73032	1	wild	0.405747	ID.48. 766	ID.48
766	5.73032	1	wild	0.405747	ID.48. 766	ID.48
766	5.73032	1	wild	0.405747	ID.48. 766	ID.48
766	5.73032	1	wild	0.405747	ID.48. 766	ID.48
766	5.73032	1	wild	0.405747	ID.48. 766	ID.48
766	5.73032	1	wild	0.405747	ID.48. 766	ID.48
766	5.73032	1	wild	0.405747	ID.48. 766	ID.48
766	5.73032	1	wild	0.405747	ID.48. 766	ID.48
766	5.73032	1	wild	0.405747	ID.48. 766	ID.48
766	5.73032	1	wild	0.405747	ID.48. 766	ID.48
766	5.73032	1	wild	0.405747	ID.48. 766	ID.48
766	5.73032	1	wild	0.405747	ID.48. 766	ID.48
766	5.73032	1	wild	0.405747	ID.48. 766	ID.48
766	5.73032	1	wild	0.405747	ID.48. 766	ID.48
766	5.73032	1	wild	0.405747	ID.48. 766	ID.48
766	5.73032	1	wild	0.405747	ID.48. 766	ID.48
766	5.73032	1	wild	0.405747	ID.48. 766	ID.48
766	5.73032	1	wild	0.405747	ID.48. 766	ID.48
766	5.73032	2	wild	0.405747	ID.48. 766	ID.48
766	5.73032	1	wild	0.405747	ID.48. 766	ID.48
766	5.73032	1	wild	0.405747	ID.48. 766	ID.48
766	5.73032	1	wild	0.405747	ID.48. 766	ID.48
766	5.73032	1	wild	0.405747	ID.48. 766	ID.48
766	5.73032	1	wild	0.405747	ID.48. 766	ID.48
766	5.73032	1	wild	0.405747	ID.48. 766	ID.48
766	5.73032	1	wild	0.405747	ID.48. 766	ID.48
766	5.73032	1	wild	0.405747	ID.48. 766	ID.48
766	5.73032	1	wild	0.405747	ID.48. 766	ID.48
766	5.73032	1	wild	0.405747	ID.48. 766	ID.48
768	5.73306	1	wild	0.406299	ID.48. 768	ID.48
768	5.73306	1	wild	0.406299	ID.48. 768	ID.48
768	5.73306	1	wild	0.406299	ID.48. 768	ID.48
768	5.73306	1	wild	0.406299	ID.48. 768	ID.48
768	5.73306	1	wild	0.406299	ID.48. 768	ID.48
768	5.73306	1	wild	0.406299	ID.48. 768	ID.48
768	5.73306	1	wild	0.406299	ID.48. 768	ID.48
768	5.73306	1	wild	0.406299	ID.48. 768	ID.48
768	5.73306	1	wild	0.406299	ID.48. 768	ID.48
768	5.73306	1	wild	0.406299	ID.48. 768	ID.48
768	5.73306	1	wild	0.406299	ID.48. 768	ID.48
768	5.73306	1	wild	0.406299	ID.48. 768	ID.48
768	5.73306	1	wild	0.406299	ID.48. 768	ID.48
768	5.73306	1	wild	0.406299	ID.48. 768	ID.48
768	5.73306	1	wild	0.406299	ID.48. 768	ID.48
768	5.73306	1	wild	0.406299	ID.48. 768	ID.48
768	5.73306	1	wild	0.406299	ID.48. 768	ID.48
768	5.73306	1	wild	0.406299	ID.48. 768	ID.48
768	5.73306	1	wild	0.406299	ID.48. 768	ID.48
768	5.73306	1	wild	0.406299	ID.48. 768	ID.48
768	5.73306	1	wild	0.406299	ID.48. 768	ID.48
768	5.73306	1	wild	0.406299	ID.48. 768	ID.48
768	5.73306	1	wild	0.406299	ID.48. 768	ID.48
768	5.73306	1	wild	0.406299	ID.48. 768	ID.48
768	5.73306	1	wild	0.406299	ID.48. 768	ID.48
768	5.73306	1	wild	0.406299	ID.48. 768	ID.48
1038	0.892539	1	wild	-1.74301	ID.19.1038	ID.19
787	13.1198	1	wild	1.36297	ID.47. 787	ID.47
788	13.1225	1	wild	1.36321	ID.47. 788	ID.47
788	13.1225	1	wild	1.36321	ID.47. 788	ID.47
788	13.1225	1	wild	1.36321	ID.47. 788	ID.47
793	10.0561	1	wild	1.05566	ID.42. 793	ID.42
793	10.0561	1	wild	1.05566	ID.42. 793	ID.42
793	10.0561	1	wild	1.05566	ID.42. 793	ID.42
793	10.0561	1	wild	1.05566	ID.42. 793	ID.42
793	10.0561	1	wild	1.05566	ID.42. 793	ID.42
793	10.0561	1	wild	1.05566	ID.42. 793	ID.42
797	10.0616	1	wild	1.05629	ID.42. 797	ID.42
1038	0.892539	1	wild	-1.74301	ID.19.1038	ID.19
797	10.0616	1	wild	1.05629	ID.42. 797	ID.42
797	10.0616	1	wild	1.05629	ID.42. 797	ID.42
797	10.0616	1	wild	1.05629	ID.42. 797	ID.42
797	10.0616	1	wild	1.05629	ID.42. 797	ID.42
798	10.0643	1	wild	1.0566	ID.42. 798	ID.42
798	10.0643	1	wild	1.0566	ID.42. 798	ID.42
798	10.0643	1	wild	1.0566	ID.42. 798	ID.42
798	10.0643	1	wild	1.0566	ID.42. 798	ID.42
798	10.0643	1	wild	1.0566	ID.42. 798	ID.42
803	8.22998	1	wild	0.824081	ID.20. 803	ID.20
803	8.22998	1	wild	0.824081	ID.20. 803	ID.20
803	8.22998	1	wild	0.824081	ID.20. 803	ID.20
803	8.22998	1	wild	0.824081	ID.20. 803	ID.20
803	8.22998	1	wild	0.824081	ID.20. 803	ID.20
803	8.22998	1	wild	0.824081	ID.20. 803	ID.20
806	8.23272	1	wild	0.824466	ID.20. 806	ID.20
806	8.23272	1	wild	0.824466	ID.20. 806	ID.20
813	12.1287	1	wild	1.2722	ID.49. 813	ID.49
757	0.54757	1	wild	-2.3076	ID.9. 757	ID.9
757	0.54757	1	wild	-2.3076	ID.9. 757	ID.9
757	0.54757	1	wild	-2.3076	ID.9. 757	ID.9
757	0.54757	1	wild	-2.3076	ID.9. 757	ID.9
757	0.54757	1	wild	-2.3076	ID.9. 757	ID.9
826	0.536619	1	wild	-2.33095	ID.9. 826	ID.9
826	0.536619	1	wild	-2.33095	ID.9. 826	ID.9
826	0.536619	1	wild	-2.33095	ID.9. 826	ID.9
826	0.536619	1	wild	-2.33095	ID.9. 826	ID.9
826	0.536619	1	wild	-2.33095	ID.9. 826	ID.9
826	0.536619	1	wild	-2.33095	ID.9. 826	ID.9
826	0.536619	1	wild	-2.33095	ID.9. 826	ID.9
826	0.536619	1	wild	-2.33095	ID.9. 826	ID.9
826	0.536619	1	wild	-2.33095	ID.9. 826	ID.9
826	0.536619	2	wild	-2.33095	ID.9. 826	ID.9
826	0.536619	1	wild	-2.33095	ID.9. 826	ID.9
826	0.536619	1	wild	-2.33095	ID.9. 826	ID.9
826	0.536619	1	wild	-2.33095	ID.9. 826	ID.9
826	0.536619	1	wild	-2.33095	ID.9. 826	ID.9
991	2.83915	2	wild	-0.405779	ID.9. 991	ID.9
991	2.83915	1	wild	-0.405779	ID.9. 991	ID.9
991	2.83915	1	wild	-0.405779	ID.9. 991	ID.9
991	2.83915	1	wild	-0.405779	ID.9. 991	ID.9
991	2.83915	1	wild	-0.405779	ID.9. 991	ID.9
991	2.83915	2	wild	-0.405779	ID.9. 991	ID.9
991	2.83915	1	wild	-0.405779	ID.9. 991	ID.9
991	2.83915	1	wild	-0.405779	ID.9. 991	ID.9
991	2.83915	1	wild	-0.405779	ID.9. 991	ID.9
991	2.83915	1	wild	-0.405779	ID.9. 991	ID.9
991	2.83915	2	wild	-0.405779	ID.9. 991	ID.9
991	2.83915	1	wild	-0.405779	ID.9. 991	ID.9
991	2.83915	2	wild	-0.405779	ID.9. 991	ID.9
991	2.83915	1	wild	-0.405779	ID.9. 991	ID.9
991	2.83915	1	wild	-0.405779	ID.9. 991	ID.9
991	2.83915	2	wild	-0.405779	ID.9. 991	ID.9
991	2.83915	1	wild	-0.405779	ID.9. 991	ID.9
991	2.83915	2	wild	-0.405779	ID.9. 991	ID.9
991	2.83915	1	wild	-0.405779	ID.9. 991	ID.9
993	2.84189	1	wild	-0.404665	ID.9. 993	ID.9
993	2.84189	1	wild	-0.404665	ID.9. 993	ID.9
993	2.84189	1	wild	-0.404665	ID.9. 993	ID.9
993	2.84189	1	wild	-0.404665	ID.9. 993	ID.9
993	2.84189	1	wild	-0.404665	ID.9. 993	ID.9
993	2.84189	1	wild	-0.404665	ID.9. 993	ID.9
993	2.84189	1	wild	-0.404665	ID.9. 993	ID.9
993	2.84189	2	wild	-0.404665	ID.9. 993	ID.9
993	2.84189	1	wild	-0.404665	ID.9. 993	ID.9
993	2.84189	1	wild	-0.404665	ID.9. 993	ID.9
993	2.84189	1	wild	-0.404665	ID.9. 993	ID.9
993	2.84189	1	wild	-0.404665	ID.9. 993	ID.9
993	2.84189	1	wild	-0.404665	ID.9. 993	ID.9
993	2.84189	1	wild	-0.404665	ID.9. 993	ID.9
993	2.84189	1	wild	-0.404665	ID.9. 993	ID.9
993	2.84189	1	wild	-0.404665	ID.9. 993	ID.9
993	2.84189	1	wild	-0.404665	ID.9. 993	ID.9
993	2.84189	1	wild	-0.404665	ID.9. 993	ID.9
993	2.84189	1	wild	-0.404665	ID.9. 993	ID.9
993	2.84189	1	wild	-0.404665	ID.9. 993	ID.9
993	2.84189	1	wild	-0.404665	ID.9. 993	ID.9
993	2.84189	1	wild	-0.404665	ID.9. 993	ID.9
993	2.84189	1	wild	-0.404665	ID.9. 993	ID.9
993	2.84189	1	wild	-0.404665	ID.9. 993	ID.9
993	2.84189	1	wild	-0.404665	ID.9. 993	ID.9
993	2.84189	1	wild	-0.404665	ID.9. 993	ID.9
993	2.84189	1	wild	-0.404665	ID.9. 993	ID.9
993	2.84189	1	wild	-0.404665	ID.9. 993	ID.9
993	2.84189	2	wild	-0.404665	ID.9. 993	ID.9
993	2.84189	1	wild	-0.404665	ID.9. 993	ID.9
993	2.84189	1	wild	-0.404665	ID.9. 993	ID.9
993	2.84189	1	wild	-0.404665	ID.9. 993	ID.9
993	2.84189	1	wild	-0.404665	ID.9. 993	ID.9
993	2.84189	1	wild	-0.404665	ID.9. 993	ID.9
993	2.84189	1	wild	-0.404665	ID.9. 993	ID.9
993	2.84189	1	wild	-0.404665	ID.9. 993	ID.9
993	2.84189	1	wild	-0.404665	ID.9. 993	ID.9
993	2.84189	2	wild	-0.404665	ID.9. 993	ID.9
993	2.84189	1	wild	-0.404665	ID.9. 993	ID.9
993	2.84189	1	wild	-0.404665	ID.9. 993	ID.9
993	2.84189	1	wild	-0.404665	ID.9. 993	ID.9
993	2.84189	1	wild	-0.404665	ID.9. 993	ID.9
993	2.84189	1	wild	-0.404665	ID.9. 993	ID.9
993	2.84189	1	wild	-0.404665	ID.9. 993	ID.9
993	2.84189	2	wild	-0.404665	ID.9. 993	ID.9
993	2.84189	2	wild	-0.404665	ID.9. 993	ID.9
993	2.84189	1	wild	-0.404665	ID.9. 993	ID.9
993	2.84189	1	wild	-0.404665	ID.9. 993	ID.9
993	2.84189	1	wild	-0.404665	ID.9. 993	ID.9
993	2.84189	1	wild	-0.404665	ID.9. 993	ID.9
993	2.84189	2	wild	-0.404665	ID.9. 993	ID.9
993	2.84189	1	wild	-0.404665	ID.9. 993	ID.9
993	2.84189	1	wild	-0.404665	ID.9. 993	ID.9
993	2.84189	1	wild	-0.404665	ID.9. 993	ID.9
993	2.84189	2	wild	-0.404665	ID.9. 993	ID.9
993	2.84189	1	wild	-0.404665	ID.9. 993	ID.9
993	2.84189	2	wild	-0.404665	ID.9. 993	ID.9
993	2.84189	1	wild	-0.404665	ID.9. 993	ID.9
993	2.84189	1	wild	-0.404665	ID.9. 993	ID.9
995	2.84463	1	wild	-0.403552	ID.9. 995	ID.9
995	2.84463	2	wild	-0.403552	ID.9. 995	ID.9
995	2.84463	1	wild	-0.403552	ID.9. 995	ID.9
995	2.84463	1	wild	-0.403552	ID.9. 995	ID.9
995	2.84463	1	wild	-0.403552	ID.9. 995	ID.9
995	2.84463	1	wild	-0.403552	ID.9. 995	ID.9
995	2.84463	1	wild	-0.403552	ID.9. 995	ID.9
995	2.84463	1	wild	-0.403552	ID.9. 995	ID.9
995	2.84463	1	wild	-0.403552	ID.9. 995	ID.9
995	2.84463	1	wild	-0.403552	ID.9. 995	ID.9
995	2.84463	1	wild	-0.403552	ID.9. 995	ID.9
995	2.84463	1	wild	-0.403552	ID.9. 995	ID.9
995	2.84463	1	wild	-0.403552	ID.9. 995	ID.9
995	2.84463	2	wild	-0.403552	ID.9. 995	ID.9
995	2.84463	1	wild	-0.403552	ID.9. 995	ID.9
995	2.84463	2	wild	-0.403552	ID.9. 995	ID.9
995	2.84463	1	wild	-0.403552	ID.9. 995	ID.9
995	2.84463	1	wild	-0.403552	ID.9. 995	ID.9
995	2.84463	1	wild	-0.403552	ID.9. 995	ID.9
995	2.84463	1	wild	-0.403552	ID.9. 995	ID.9
995	2.84463	1	wild	-0.403552	ID.9. 995	ID.9
995	2.84463	1	wild	-0.403552	ID.9. 995	ID.9
995	2.84463	1	wild	-0.403552	ID.9. 995	ID.9
995	2.84463	2	wild	-0.403552	ID.9. 995	ID.9
995	2.84463	1	wild	-0.403552	ID.9. 995	ID.9
995	2.84463	2	wild	-0.403552	ID.9. 995	ID.9
995	2.84463	2	wild	-0.403552	ID.9. 995	ID.9
995	2.84463	1	wild	-0.403552	ID.9. 995	ID.9
995	2.84463	1	wild	-0.403552	ID.9. 995	ID.9
995	2.84463	1	wild	-0.403552	ID.9. 995	ID.9
995	2.84463	1	wild	-0.403552	ID.9. 995	ID.9
995	2.84463	1	wild	-0.403552	ID.9. 995	ID.9
995	2.84463	2	wild	-0.403552	ID.9. 995	ID.9
995	2.84463	1	wild	-0.403552	ID.9. 995	ID.9
995	2.84463	1	wild	-0.403552	ID.9. 995	ID.9
995	2.84463	2	wild	-0.403552	ID.9. 995	ID.9
995	2.84463	2	wild	-0.403552	ID.9. 995	ID.9
995	2.84463	1	wild	-0.403552	ID.9. 995	ID.9
995	2.84463	1	wild	-0.403552	ID.9. 995	ID.9
995	2.84463	1	wild	-0.403552	ID.9. 995	ID.9
995	2.84463	1	wild	-0.403552	ID.9. 995	ID.9
995	2.84463	1	wild	-0.403552	ID.9. 995	ID.9
995	2.84463	1	wild	-0.403552	ID.9. 995	ID.9
995	2.84463	1	wild	-0.403552	ID.9. 995	ID.9
995	2.84463	3	wild	-0.403552	ID.9. 995	ID.9
995	2.84463	1	wild	-0.403552	ID.9. 995	ID.9
995	2.84463	1	wild	-0.403552	ID.9. 995	ID.9
995	2.84463	1	wild	-0.403552	ID.9. 995	ID.9
995	2.84463	1	wild	-0.403552	ID.9. 995	ID.9
995	2.84463	1	wild	-0.403552	ID.9. 995	ID.9
995	2.84463	1	wild	-0.403552	ID.9. 995	ID.9
995	2.84463	1	wild	-0.403552	ID.9. 995	ID.9
995	2.84463	1	wild	-0.403552	ID.9. 995	ID.9
995	2.84463	1	wild	-0.403552	ID.9. 995	ID.9
995	2.84463	1	wild	-0.403552	ID.9. 995	ID.9
995	2.84463	1	wild	-0.403552	ID.9. 995	ID.9
995	2.84463	2	wild	-0.403552	ID.9. 995	ID.9
995	2.84463	2	wild	-0.403552	ID.9. 995	ID.9
995	2.84463	1	wild	-0.403552	ID.9. 995	ID.9
995	2.84463	1	wild	-0.403552	ID.9. 995	ID.9
995	2.84463	1	wild	-0.403552	ID.9. 995	ID.9
995	2.84463	1	wild	-0.403552	ID.9. 995	ID.9
995	2.84463	2	wild	-0.403552	ID.9. 995	ID.9
995	2.84463	1	wild	-0.403552	ID.9. 995	ID.9
995	2.84463	2	wild	-0.403552	ID.9. 995	ID.9
995	2.84463	1	wild	-0.403552	ID.9. 995	ID.9
995	2.84463	1	wild	-0.403552	ID.9. 995	ID.9
995	2.84463	1	wild	-0.403552	ID.9. 995	ID.9
995	2.84463	2	wild	-0.403552	ID.9. 995	ID.9
995	2.84463	1	wild	-0.403552	ID.9. 995	ID.9
995	2.84463	2	wild	-0.403552	ID.9. 995	ID.9
995	2.84463	2	wild	-0.403552	ID.9. 995	ID.9
995	2.84463	1	wild	-0.403552	ID.9. 995	ID.9
995	2.84463	1	wild	-0.403552	ID.9. 995	ID.9
995	2.84463	2	wild	-0.403552	ID.9. 995	ID.9
995	2.84463	1	wild	-0.403552	ID.9. 995	ID.9
995	2.84463	1	wild	-0.403552	ID.9. 995	ID.9
995	2.84463	1	wild	-0.403552	ID.9. 995	ID.9
995	2.84463	1	wild	-0.403552	ID.9. 995	ID.9
995	2.84463	1	wild	-0.403552	ID.9. 995	ID.9
995	2.84463	1	wild	-0.403552	ID.9. 995	ID.9
995	2.84463	1	wild	-0.403552	ID.9. 995	ID.9
995	2.84463	1	wild	-0.403552	ID.9. 995	ID.9
995	2.84463	1	wild	-0.403552	ID.9. 995	ID.9
995	2.84463	2	wild	-0.403552	ID.9. 995	ID.9
995	2.84463	2	wild	-0.403552	ID.9. 995	ID.9
995	2.84463	1	wild	-0.403552	ID.9. 995	ID.9
999	2.8501	1	wild	-0.40133	ID.9. 999	ID.9
999	2.8501	1	wild	-0.40133	ID.9. 999	ID.9
999	2.8501	1	wild	-0.40133	ID.9. 999	ID.9
999	2.8501	1	wild	-0.40133	ID.9. 999	ID.9
999	2.8501	2	wild	-0.40133	ID.9. 999	ID.9
1044	2.91307	1	wild	-0.376076	ID.9.1044	ID.9
999	2.8501	1	wild	-0.40133	ID.9. 999	ID.9
999	2.8501	1	wild	-0.40133	ID.9. 999	ID.9
999	2.8501	1	wild	-0.40133	ID.9. 999	ID.9
999	2.8501	1	wild	-0.40133	ID.9. 999	ID.9
999	2.8501	1	wild	-0.40133	ID.9. 999	ID.9
999	2.8501	1	wild	-0.40133	ID.9. 999	ID.9
999	2.8501	1	wild	-0.40133	ID.9. 999	ID.9
999	2.8501	1	wild	-0.40133	ID.9. 999	ID.9
1001	2.85284	1	wild	-0.40022	ID.9.1001	ID.9
1001	2.85284	1	wild	-0.40022	ID.9.1001	ID.9
1001	2.85284	1	wild	-0.40022	ID.9.1001	ID.9
1001	2.85284	1	wild	-0.40022	ID.9.1001	ID.9
1001	2.85284	2	wild	-0.40022	ID.9.1001	ID.9
1001	2.85284	1	wild	-0.40022	ID.9.1001	ID.9
1001	2.85284	1	wild	-0.40022	ID.9.1001	ID.9
1001	2.85284	1	wild	-0.40022	ID.9.1001	ID.9
1001	2.85284	1	wild	-0.40022	ID.9.1001	ID.9
1001	2.85284	1	wild	-0.40022	ID.9.1001	ID.9
1001	2.85284	1	wild	-0.40022	ID.9.1001	ID.9
1001	2.85284	1	wild	-0.40022	ID.9.1001	ID.9
1001	2.85284	1	wild	-0.40022	ID.9.1001	ID.9
1001	2.85284	1	wild	-0.40022	ID.9.1001	ID.9
1001	2.85284	2	wild	-0.40022	ID.9.1001	ID.9
1001	2.85284	2	wild	-0.40022	ID.9.1001	ID.9
1001	2.85284	1	wild	-0.40022	ID.9.1001	ID.9
1001	2.85284	1	wild	-0.40022	ID.9.1001	ID.9
1001	2.85284	1	wild	-0.40022	ID.9.1001	ID.9
1001	2.85284	2	wild	-0.40022	ID.9.1001	ID.9
1001	2.85284	1	wild	-0.40022	ID.9.1001	ID.9
1001	2.85284	1	wild	-0.40022	ID.9.1001	ID.9
1001	2.85284	2	wild	-0.40022	ID.9.1001	ID.9
1001	2.85284	2	wild	-0.40022	ID.9.1001	ID.9
1001	2.85284	1	wild	-0.40022	ID.9.1001	ID.9
1001	2.85284	1	wild	-0.40022	ID.9.1001	ID.9
1001	2.85284	1	wild	-0.40022	ID.9.1001	ID.9
1001	2.85284	1	wild	-0.40022	ID.9.1001	ID.9
1001	2.85284	1	wild	-0.40022	ID.9.1001	ID.9
1001	2.85284	1	wild	-0.40022	ID.9.1001	ID.9
1001	2.85284	2	wild	-0.40022	ID.9.1001	ID.9
1001	2.85284	1	wild	-0.40022	ID.9.1001	ID.9
1001	2.85284	2	wild	-0.40022	ID.9.1001	ID.9
1001	2.85284	1	wild	-0.40022	ID.9.1001	ID.9
1001	2.85284	2	wild	-0.40022	ID.9.1001	ID.9
1001	2.85284	1	wild	-0.40022	ID.9.1001	ID.9
1001	2.85284	1	wild	-0.40022	ID.9.1001	ID.9
1001	2.85284	1	wild	-0.40022	ID.9.1001	ID.9
1001	2.85284	3	wild	-0.40022	ID.9.1001	ID.9
1001	2.85284	2	wild	-0.40022	ID.9.1001	ID.9
1001	2.85284	1	wild	-0.40022	ID.9.1001	ID.9
1001	2.85284	2	wild	-0.40022	ID.9.1001	ID.9
1001	2.85284	1	wild	-0.40022	ID.9.1001	ID.9
1001	2.85284	2	wild	-0.40022	ID.9.1001	ID.9
1001	2.85284	1	wild	-0.40022	ID.9.1001	ID.9
1001	2.85284	1	wild	-0.40022	ID.9.1001	ID.9
1001	2.85284	1	wild	-0.40022	ID.9.1001	ID.9
1001	2.85284	1	wild	-0.40022	ID.9.1001	ID.9
1001	2.85284	1	wild	-0.40022	ID.9.1001	ID.9
1001	2.85284	1	wild	-0.40022	ID.9.1001	ID.9
1001	2.85284	1	wild	-0.40022	ID.9.1001	ID.9
1001	2.85284	1	wild	-0.40022	ID.9.1001	ID.9
1001	2.85284	1	wild	-0.40022	ID.9.1001	ID.9
1001	2.85284	1	wild	-0.40022	ID.9.1001	ID.9
1001	2.85284	1	wild	-0.40022	ID.9.1001	ID.9
1001	2.85284	1	wild	-0.40022	ID.9.1001	ID.9
1001	2.85284	1	wild	-0.40022	ID.9.1001	ID.9
1001	2.85284	1	wild	-0.40022	ID.9.1001	ID.9
1001	2.85284	1	wild	-0.40022	ID.9.1001	ID.9
1001	2.85284	1	wild	-0.40022	ID.9.1001	ID.9
1001	2.85284	1	wild	-0.40022	ID.9.1001	ID.9
1001	2.85284	1	wild	-0.40022	ID.9.1001	ID.9
1001	2.85284	1	wild	-0.40022	ID.9.1001	ID.9
1001	2.85284	1	wild	-0.40022	ID.9.1001	ID.9
1001	2.85284	1	wild	-0.40022	ID.9.1001	ID.9
1001	2.85284	1	wild	-0.40022	ID.9.1001	ID.9
1001	2.85284	1	wild	-0.40022	ID.9.1001	ID.9
1001	2.85284	2	wild	-0.40022	ID.9.1001	ID.9
1001	2.85284	1	wild	-0.40022	ID.9.1001	ID.9
1001	2.85284	1	wild	-0.40022	ID.9.1001	ID.9
1001	2.85284	1	wild	-0.40022	ID.9.1001	ID.9
1001	2.85284	1	wild	-0.40022	ID.9.1001	ID.9
1014	0.865161	1	wild	-1.77901	ID.19.1014	ID.19
1014	0.865161	2	wild	-1.77901	ID.19.1014	ID.19
1014	0.865161	1	wild	-1.77901	ID.19.1014	ID.19
1014	0.865161	1	wild	-1.77901	ID.19.1014	ID.19
1014	0.865161	1	wild	-1.77901	ID.19.1014	ID.19
1014	0.865161	1	wild	-1.77901	ID.19.1014	ID.19
1014	0.865161	1	wild	-1.77901	ID.19.1014	ID.19
1014	0.865161	1	wild	-1.77901	ID.19.1014	ID.19
1014	0.865161	1	wild	-1.77901	ID.19.1014	ID.19
1014	0.865161	1	wild	-1.77901	ID.19.1014	ID.19
1014	0.865161	1	wild	-1.77901	ID.19.1014	ID.19
1014	0.865161	1	wild	-1.77901	ID.19.1014	ID.19
1014	0.865161	1	wild	-1.77901	ID.19.1014	ID.19
1014	0.865161	1	wild	-1.77901	ID.19.1014	ID.19
1014	0.865161	1	wild	-1.77901	ID.19.1014	ID.19
1014	0.865161	1	wild	-1.77901	ID.19.1014	ID.19
1014	0.865161	1	wild	-1.77901	ID.19.1014	ID.19
1014	0.865161	1	wild	-1.77901	ID.19.1014	ID.19
1014	0.865161	1	wild	-1.77901	ID.19.1014	ID.19
1014	0.865161	1	wild	-1.77901	ID.19.1014	ID.19
1014	0.865161	1	wild	-1.77901	ID.19.1014	ID.19
1014	0.865161	1	wild	-1.77901	ID.19.1014	ID.19
1014	0.865161	2	wild	-1.77901	ID.19.1014	ID.19
1014	0.865161	1	wild	-1.77901	ID.19.1014	ID.19
1014	0.865161	1	wild	-1.77901	ID.19.1014	ID.19
1014	0.865161	1	wild	-1.77901	ID.19.1014	ID.19
1014	0.865161	1	wild	-1.77901	ID.19.1014	ID.19
1014	0.865161	1	wild	-1.77901	ID.19.1014	ID.19
1014	0.865161	1	wild	-1.77901	ID.19.1014	ID.19
1014	0.865161	1	wild	-1.77901	ID.19.1014	ID.19
1014	0.865161	1	wild	-1.77901	ID.19.1014	ID.19
1014	0.865161	1	wild	-1.77901	ID.19.1014	ID.19
1014	0.865161	1	wild	-1.77901	ID.19.1014	ID.19
1014	0.865161	1	wild	-1.77901	ID.19.1014	ID.19
1014	0.865161	1	wild	-1.77901	ID.19.1014	ID.19
1014	0.865161	1	wild	-1.77901	ID.19.1014	ID.19
1014	0.865161	1	wild	-1.77901	ID.19.1014	ID.19
1014	0.865161	2	wild	-1.77901	ID.19.1014	ID.19
1014	0.865161	1	wild	-1.77901	ID.19.1014	ID.19
1014	0.865161	1	wild	-1.77901	ID.19.1014	ID.19
1014	0.865161	1	wild	-1.77901	ID.19.1014	ID.19
1014	0.865161	1	wild	-1.77901	ID.19.1014	ID.19
1018	0.867899	1	wild	-1.77536	ID.19.1018	ID.19
1018	0.867899	1	wild	-1.77536	ID.19.1018	ID.19
1018	0.867899	1	wild	-1.77536	ID.19.1018	ID.19
1018	0.867899	1	wild	-1.77536	ID.19.1018	ID.19
1018	0.867899	1	wild	-1.77536	ID.19.1018	ID.19
1018	0.867899	1	wild	-1.77536	ID.19.1018	ID.19
1018	0.867899	1	wild	-1.77536	ID.19.1018	ID.19
1018	0.867899	1	wild	-1.77536	ID.19.1018	ID.19
1018	0.867899	1	wild	-1.77536	ID.19.1018	ID.19
1018	0.867899	1	wild	-1.77536	ID.19.1018	ID.19
1018	0.867899	1	wild	-1.77536	ID.19.1018	ID.19
1018	0.867899	1	wild	-1.77536	ID.19.1018	ID.19
1018	0.867899	1	wild	-1.77536	ID.19.1018	ID.19
1018	0.867899	1	wild	-1.77536	ID.19.1018	ID.19
1018	0.867899	1	wild	-1.77536	ID.19.1018	ID.19
1018	0.867899	2	wild	-1.77536	ID.19.1018	ID.19
1018	0.867899	1	wild	-1.77536	ID.19.1018	ID.19
1018	0.867899	1	wild	-1.77536	ID.19.1018	ID.19
1018	0.867899	1	wild	-1.77536	ID.19.1018	ID.19
1018	0.867899	1	wild	-1.77536	ID.19.1018	ID.19
1018	0.867899	1	wild	-1.77536	ID.19.1018	ID.19
1018	0.867899	2	wild	-1.77536	ID.19.1018	ID.19
1018	0.867899	1	wild	-1.77536	ID.19.1018	ID.19
1018	0.867899	1	wild	-1.77536	ID.19.1018	ID.19
1018	0.867899	1	wild	-1.77536	ID.19.1018	ID.19
1018	0.867899	1	wild	-1.77536	ID.19.1018	ID.19
1018	0.867899	1	wild	-1.77536	ID.19.1018	ID.19
1018	0.867899	1	wild	-1.77536	ID.19.1018	ID.19
1018	0.867899	2	wild	-1.77536	ID.19.1018	ID.19
1018	0.867899	1	wild	-1.77536	ID.19.1018	ID.19
1018	0.867899	1	wild	-1.77536	ID.19.1018	ID.19
1018	0.867899	2	wild	-1.77536	ID.19.1018	ID.19
1018	0.867899	1	wild	-1.77536	ID.19.1018	ID.19
1018	0.867899	1	wild	-1.77536	ID.19.1018	ID.19
1018	0.867899	1	wild	-1.77536	ID.19.1018	ID.19
1024	0.876112	1	wild	-1.76447	ID.19.1024	ID.19
1024	0.876112	1	wild	-1.76447	ID.19.1024	ID.19
1024	0.876112	1	wild	-1.76447	ID.19.1024	ID.19
1024	0.876112	1	wild	-1.76447	ID.19.1024	ID.19
1024	0.876112	1	wild	-1.76447	ID.19.1024	ID.19
1024	0.876112	1	wild	-1.76447	ID.19.1024	ID.19
1024	0.876112	1	wild	-1.76447	ID.19.1024	ID.19
1024	0.876112	2	wild	-1.76447	ID.19.1024	ID.19
1024	0.876112	1	wild	-1.76447	ID.19.1024	ID.19
1024	0.876112	1	wild	-1.76447	ID.19.1024	ID.19
1024	0.876112	1	wild	-1.76447	ID.19.1024	ID.19
1024	0.876112	1	wild	-1.76447	ID.19.1024	ID.19
1024	0.876112	1	wild	-1.76447	ID.19.1024	ID.19
1024	0.876112	1	wild	-1.76447	ID.19.1024	ID.19
1024	0.876112	1	wild	-1.76447	ID.19.1024	ID.19
1024	0.876112	1	wild	-1.76447	ID.19.1024	ID.19
1024	0.876112	1	wild	-1.76447	ID.19.1024	ID.19
1024	0.876112	1	wild	-1.76447	ID.19.1024	ID.19
1024	0.876112	1	wild	-1.76447	ID.19.1024	ID.19
1024	0.876112	1	wild	-1.76447	ID.19.1024	ID.19
1024	0.876112	1	wild	-1.76447	ID.19.1024	ID.19
1024	0.876112	1	wild	-1.76447	ID.19.1024	ID.19
1024	0.876112	1	wild	-1.76447	ID.19.1024	ID.19
1024	0.876112	1	wild	-1.76447	ID.19.1024	ID.19
1024	0.876112	1	wild	-1.76447	ID.19.1024	ID.19
1024	0.876112	2	wild	-1.76447	ID.19.1024	ID.19
1024	0.876112	2	wild	-1.76447	ID.19.1024	ID.19
1024	0.876112	1	wild	-1.76447	ID.19.1024	ID.19
1024	0.876112	1	wild	-1.76447	ID.19.1024	ID.19
1029	0.881588	1	wild	-1.75727	ID.19.1029	ID.19
1029	0.881588	1	wild	-1.75727	ID.19.1029	ID.19
1029	0.881588	1	wild	-1.75727	ID.19.1029	ID.19
1029	0.881588	2	wild	-1.75727	ID.19.1029	ID.19
1029	0.881588	1	wild	-1.75727	ID.19.1029	ID.19
1029	0.881588	1	wild	-1.75727	ID.19.1029	ID.19
1029	0.881588	2	wild	-1.75727	ID.19.1029	ID.19
1029	0.881588	2	wild	-1.75727	ID.19.1029	ID.19
1029	0.881588	1	wild	-1.75727	ID.19.1029	ID.19
1029	0.881588	2	wild	-1.75727	ID.19.1029	ID.19
1029	0.881588	1	wild	-1.75727	ID.19.1029	ID.19
1029	0.881588	1	wild	-1.75727	ID.19.1029	ID.19
1029	0.881588	1	wild	-1.75727	ID.19.1029	ID.19
1029	0.881588	1	wild	-1.75727	ID.19.1029	ID.19
1029	0.881588	1	wild	-1.75727	ID.19.1029	ID.19
1029	0.881588	3	wild	-1.75727	ID.19.1029	ID.19
1029	0.881588	1	wild	-1.75727	ID.19.1029	ID.19
1029	0.881588	1	wild	-1.75727	ID.19.1029	ID.19
1029	0.881588	1	wild	-1.75727	ID.19.1029	ID.19
1029	0.881588	1	wild	-1.75727	ID.19.1029	ID.19
1029	0.881588	1	wild	-1.75727	ID.19.1029	ID.19
1029	0.881588	1	wild	-1.75727	ID.19.1029	ID.19
1029	0.881588	1	wild	-1.75727	ID.19.1029	ID.19
1029	0.881588	2	wild	-1.75727	ID.19.1029	ID.19
1029	0.881588	3	wild	-1.75727	ID.19.1029	ID.19
1029	0.881588	1	wild	-1.75727	ID.19.1029	ID.19
1029	0.881588	1	wild	-1.75727	ID.19.1029	ID.19
1029	0.881588	1	wild	-1.75727	ID.19.1029	ID.19
1029	0.881588	1	wild	-1.75727	ID.19.1029	ID.19
1029	0.881588	1	wild	-1.75727	ID.19.1029	ID.19
1029	0.881588	1	wild	-1.75727	ID.19.1029	ID.19
1029	0.881588	2	wild	-1.75727	ID.19.1029	ID.19
1029	0.881588	1	wild	-1.75727	ID.19.1029	ID.19
1029	0.881588	1	wild	-1.75727	ID.19.1029	ID.19
1029	0.881588	1	wild	-1.75727	ID.19.1029	ID.19
1029	0.881588	2	wild	-1.75727	ID.19.1029	ID.19
1029	0.881588	1	wild	-1.75727	ID.19.1029	ID.19
1029	0.881588	2	wild	-1.75727	ID.19.1029	ID.19
1029	0.881588	1	wild	-1.75727	ID.19.1029	ID.19
1029	0.881588	1	wild	-1.75727	ID.19.1029	ID.19
1029	0.881588	1	wild	-1.75727	ID.19.1029	ID.19
1029	0.881588	1	wild	-1.75727	ID.19.1029	ID.19
1029	0.881588	1	wild	-1.75727	ID.19.1029	ID.19
1029	0.881588	1	wild	-1.75727	ID.19.1029	ID.19
1029	0.881588	1	wild	-1.75727	ID.19.1029	ID.19
1029	0.881588	1	wild	-1.75727	ID.19.1029	ID.19
1029	0.881588	1	wild	-1.75727	ID.19.1029	ID.19
1029	0.881588	1	wild	-1.75727	ID.19.1029	ID.19
1029	0.881588	1	wild	-1.75727	ID.19.1029	ID.19
1029	0.881588	1	wild	-1.75727	ID.19.1029	ID.19
1029	0.881588	1	wild	-1.75727	ID.19.1029	ID.19
1029	0.881588	1	wild	-1.75727	ID.19.1029	ID.19
1029	0.881588	1	wild	-1.75727	ID.19.1029	ID.19
1029	0.881588	2	wild	-1.75727	ID.19.1029	ID.19
1029	0.881588	1	wild	-1.75727	ID.19.1029	ID.19
[truncated: 10,998 more rows]

## Sheet: model 2d
Zoo_Wild	nr.objects	FollowNr	AgeAtThatTime	bin.resp	z.log.AgeAtThatTime	follow.in.subj	FocalName
[truncated: 12,486 more rows]

[truncated: 1 more sheets: model 3a and 3b]
